# Supplementary material
Source: PubMed Central journal article supplement (PMC6918093)
Supplement: mBio.02994-19-st003.pdf [file mBio.02994-19-st003.pdf]

**Table S3** Histopathological changes in tissue samples obtained on scheduled necropsy days. To evaluate the degree of change for each described feature the following scale was used: 0- no lesion/change; 1-minimal change; 2- mild change; 3- moderate change; 4- marked change; and 5-severe change.

| Model development experiment           | Kp1-Day 9<br>10 <sup>8</sup> CFU | Kp2-Day 5<br>10 <sup>8</sup> CFU | Kp3-Day 13<br>10 <sup>8</sup> CFU | Kp4-Day 13<br>10 <sup>10</sup> CFU | Kp5-Day 9<br>10 <sup>10</sup> CFU | Kp6-Day 5<br>10 <sup>10</sup> CFU | Vaccination experiment                 | Kp13-Day 3<br>Sham | Kp14-Day 3<br>Sham | Kp7-Day 3<br>CPS2 | Kp11-Day 3<br>CPS2 | Kp12-Day 5<br>Sham | Kp10-Day 5<br>CPS2 | Kp15-Day 7<br>Sham | Kp16-Day 7<br>Sham | Kp8-Day 7<br>CPS2 | Kp9-Day 7<br>CPS2 |
|----------------------------------------|----------------------------------|----------------------------------|-----------------------------------|------------------------------------|-----------------------------------|-----------------------------------|----------------------------------------|--------------------|--------------------|-------------------|--------------------|--------------------|--------------------|--------------------|--------------------|-------------------|-------------------|
| Cervical LN                            |                                  |                                  |                                   |                                    |                                   | not examined                      | Cervical LN                            |                    |                    |                   | not examined       |                    |                    |                    |                    |                   |                   |
| active germinal centers                | 2                                | 2                                | 1                                 | 3                                  | 0                                 |                                   | hyperplasia                            | 0                  | 1                  | 0                 |                    | 0                  | 1                  | 1                  | 1                  | 0                 | 2                 |
| draining neutrophils                   | 0                                | 0                                | 0                                 | 1                                  | 2                                 |                                   | draining neutrophils                   | 0                  | 0                  | 0                 |                    | 1                  | 1                  | 2                  | 2                  | 0                 | 1                 |
|                                        |                                  |                                  |                                   |                                    |                                   |                                   | edema                                  | 0                  | 0                  | 0                 |                    | 1                  | 0                  | 0                  | 0                  | 0                 | 0                 |
| Mediastinal LN                         |                                  |                                  |                                   |                                    |                                   |                                   | Mediastinal LN                         |                    |                    |                   |                    |                    |                    |                    |                    |                   |                   |
| edema                                  | 0                                | 0                                | 0                                 | 0                                  | 0                                 | 0                                 | edema                                  | 2                  | 0                  | 2                 | 0                  | 1                  | 2                  | 0                  | 0                  | 1                 | 0                 |
| draining neutrophils                   | 1                                | 0                                | 0                                 | 1                                  | 0                                 | 3                                 | draining neutrophils                   | 2                  | 1                  | 0                 | 1                  | 0                  | 0                  | 0                  | 0                  | 0                 | 0                 |
| draining eosinophils                   | 2                                | 1                                | 0                                 | 1                                  | 0                                 | 0                                 | draining eosinophils                   | 0                  | 0                  | 0                 | 0                  | 0                  | 0                  | 1                  | 0                  | 0                 | 0                 |
| draining macrophages                   | 0                                | 0                                | 0                                 | 0                                  | 0                                 | 2                                 | draining macrophages                   | 0                  | 2                  | 0                 | 0                  | 0                  | 0                  | 0                  | 0                  | 0                 | 0                 |
| medullary cord hyperplasia             | 2                                | 2                                | 2                                 | 2                                  | 2                                 | 2                                 | hyperplasia                            | 0                  | 0                  | 2                 | 0                  | 2                  | 1                  | 1                  | 0                  | 2                 | 0                 |
| Trachea                                |                                  |                                  |                                   |                                    |                                   |                                   | Trachea                                |                    |                    |                   |                    |                    |                    |                    |                    |                   |                   |
| tracheitis                             | 1                                | 1                                | 1                                 | 1                                  | 1                                 | 1                                 | tracheitis                             | 0                  | 2                  | 0                 | 1                  | 0                  | 0                  | 1                  | 0                  | 0                 | 1                 |
| Heart                                  |                                  |                                  |                                   |                                    |                                   |                                   | Heart                                  |                    |                    |                   |                    |                    |                    |                    |                    |                   |                   |
| inflammation                           | 0                                | 0                                | 0                                 | 1                                  | 0                                 | 0                                 | inflammation                           | 0                  | 0                  | 0                 | 0                  | 0                  | 0                  | 0                  | 0                  | 1                 | 0                 |
| Lungs-Right Upper Lobe                 |                                  |                                  |                                   |                                    |                                   |                                   | Lungs-Right Upper Lobe                 |                    |                    |                   |                    |                    |                    |                    |                    |                   |                   |
| neutrophil infiltrates                 | 1                                | 2                                | 1                                 | 0                                  | 1                                 | 4                                 | neutrophil infiltrates                 | 4                  | 2                  | 2                 | 4                  | 1                  | 0                  | 0                  | 0                  | 1                 | 0                 |
| lymphocytic infiltrates                | 2                                | 1                                | 1                                 | 1                                  | 1                                 | 1                                 | lymphocytic infiltrates                | 2                  | 2                  | 1                 | 2                  | 2                  | 2                  | 2                  | 2                  | 2                 | 2                 |
| macrophage infiltrates                 | 2                                | 2                                | 1                                 | 1                                  | 2                                 | 2                                 | macrophage infiltrates                 | 3                  | 3                  | 2                 | 4                  | 3                  | 4                  | 2                  | 3                  | 4                 | 2                 |
| airway edema                           | 0                                | 0                                | 0                                 | 0                                  | 0                                 | 0                                 | airway edema                           | 3                  | 1                  | 0                 | 2                  | 2                  | 3                  | 0                  | 0                  | 3                 | 0                 |
| bronchiolitis/peribronchiolitis        | 2                                | 2                                | 1                                 | 1                                  | 2                                 | 4                                 | bronchiolitis/peribronchiolitis        | 2                  | 2                  | 2                 | 2                  | 2                  | 2                  | 1                  | 0                  | 3                 | 1                 |
| thickened alveolar septae              | 0                                | 2                                | 1                                 | 2                                  | 1                                 | 2                                 | thickened alveolar septae              | 2                  | 0                  | 2                 | 3                  | 2                  | 3                  | 2                  | 2                  | 3                 | 2                 |
| organized fibrin                       | 0                                | 2                                | 1                                 | 0                                  | 1                                 | 2                                 | organized fibrin                       | 2                  | 2                  | 0                 | 2                  | 2                  | 4                  | 1                  | 0                  | 3                 | 0                 |
| bronchiolitis obliterans               | 0                                | 0                                | 0                                 | 0                                  | 0                                 | 0                                 | bronchiolitis obliterans               | 0                  | 0                  | 0                 | 0                  | 0                  | 0                  | 0                  | 0                  | 3                 | 0                 |
| type II pneumocyte hyperplasia         | 0                                | 2                                | 0                                 | 1                                  | 1                                 | 3                                 | type II pneumocyte hyperplasia         | 3                  | 0                  | 0                 | 3                  | 2                  | 2                  | 2                  | 2                  | 3                 | 1                 |
| lymphocytic infiltrates/perivasculitis | 1                                | 2                                | 1                                 | 1                                  | 1                                 | 1                                 | lymphocytic infiltrates/perivasculitis | 2                  | 1                  | 2                 | 3                  | 2                  | 2                  | 2                  | 1                  | 3                 | 2                 |
| aspiration pneumonia                   | 2                                | 0                                | 0                                 | 0                                  | 0                                 | 0                                 | aspiration pneumonia                   | 0                  | 0                  | 0                 | 0                  | 0                  | 0                  | 0                  | 0                  | 0                 | 0                 |
| pleuritis                              | 1                                | 0                                | 1                                 | 2                                  | 2                                 | 1                                 | pleuritis                              | 1                  | 0                  | 0                 | 1                  | 0                  | 1                  | 1                  | 1                  | 4                 | 1                 |
| Lungs-Right Middle Lobe                |                                  |                                  |                                   |                                    |                                   |                                   | Lungs-Right Middle Lobe                |                    |                    |                   |                    |                    |                    |                    |                    |                   |                   |
| neutrophil infiltrates                 | 1                                | 1                                | 0                                 | 0                                  | 1                                 | 3                                 | neutrophil infiltrates                 | 3                  | 3                  | 3                 | 3                  | 2                  | 0                  | 0                  | 0                  | 1                 | 0                 |
| lymphocytic infiltrates                | 2                                | 1                                | 1                                 | 1                                  | 1                                 | 1                                 | lymphocytic infiltrates                | 2                  | 2                  | 2                 | 2                  | 2                  | 2                  | 2                  | 2                  | 2                 | 2                 |
| macrophage infiltrates                 | 2                                | 2                                | 1                                 | 2                                  | 2                                 | 3                                 | macrophage infiltrates                 | 3                  | 3                  | 3                 | 4                  | 3                  | 3                  | 3                  | 3                  | 4                 | 2                 |
| airway edema                           | 0                                | 0                                | 0                                 | 0                                  | 0                                 | 0                                 | airway edema                           | 1                  | 2                  | 0                 | 0                  | 0                  | 0                  | 0                  | 0                  | 3                 | 0                 |
| bronchiolitis/peribronchiolitis        | 2                                | 2                                | 1                                 | 0                                  | 2                                 | 2                                 | bronchiolitis/peribronchiolitis        | 2                  | 2                  | 2                 | 2                  | 2                  | 1                  | 1                  | 1                  | 2                 | 1                 |
| thickened alveolar septae              | 2.5                              | 2                                | 1                                 | 1                                  | 2                                 | 2                                 | thickened alveolar septae              | 2                  | 2                  | 2                 | 3                  | 2                  | 3                  | 3                  | 2                  | 2                 | 2                 |
| organized fibrin                       | 0                                | 1                                | 0                                 | 0                                  | 2                                 | 1                                 | organized fibrin                       | 1                  | 2                  | 1                 | 2                  | 2                  | 2                  | 2                  | 1                  | 3                 | 1                 |
| bronchiolitis obliterans               | 2                                | 0                                | 0                                 | 0                                  | 3                                 | 1                                 | bronchiolitis obliterans               | 0                  | 0                  | 0                 | 0                  | 0                  | 0                  | 1                  | 0                  | 3                 | 1                 |
| type II pneumocyte hyperplasia         | 2                                | 2                                | 1                                 | 1                                  | 2                                 | 2                                 | type II pneumocyte hyperplasia         | 3                  | 3                  | 2                 | 3                  | 3                  | 3                  | 3                  | 2                  | 3                 | 2                 |
| lymphocytic infiltrates/perivasculitis | 2.5                              | 1                                | 1                                 | 2                                  | 2                                 | 2                                 | lymphocytic infiltrates/perivasculitis | 2                  | 2                  | 3                 | 2                  | 2                  | 2                  | 2                  | 1                  | 3                 | 3                 |
| aspiration pneumonia                   | 0                                | 0                                | 0                                 | 0                                  | 0                                 | 0                                 | aspiration pneumonia                   | 0                  | 0                  | 0                 | 0                  | 3                  | 0                  | 0                  | 0                  | 0                 | 0                 |
| pleuritis                              | 2                                | 1                                | 2                                 | 3                                  | 4                                 | 4                                 | pleuritis                              | 1                  | 1                  | 2                 | 1                  | 1                  | 1                  | 1                  | 2                  | 3                 | 2                 |
| Lungs-Right Lower Lobe                 |                                  |                                  |                                   |                                    |                                   |                                   | Lungs-Right Lower Lobe                 |                    |                    |                   |                    |                    |                    |                    |                    |                   |                   |
| neutrophil infiltrates                 | 2                                | 1                                | 0                                 | 0                                  | 2                                 | 4                                 | neutrophil infiltrates                 | 4                  | 3                  | 3                 | 4                  | 2                  | 0                  | 0                  | 0                  | 1                 | 0                 |
| lymphocytic infiltrates                | 0                                | 1                                | 1                                 | 1                                  | 1                                 | 1                                 | lymphocytic infiltrates                | 2                  | 1                  | 2                 | 2                  | 2                  | 2                  | 2                  | 2                  | 3                 | 2                 |
| macrophage infiltrates                 | 3                                | 2                                | 1                                 | 2                                  | 4                                 | 4                                 | macrophage infiltrates                 | 3                  | 3                  | 3                 | 4                  | 3                  | 4                  | 4                  | 3                  | 4                 | 3                 |
| airway edema                           | 0                                | 0                                | 0                                 | 0                                  | 4                                 | 2                                 | airway edema                           | 3                  | 2                  | 1                 | 3                  | 0                  | 0                  | 2                  | 0                  | 3                 | 0                 |
| bronchiolitis/peribronchiolitis        | 2                                | 2                                | 1                                 | 1                                  | 4                                 | 4                                 | bronchiolitis/peribronchiolitis        | 3                  | 2                  | 0                 | 2                  | 1                  | 1                  | 2                  | 1                  | 2                 | 0                 |
| thickened alveolar septae              | 2                                | 2                                | 1                                 | 2                                  | 4                                 | 3                                 | thickened alveolar septae              | 2                  | 2                  | 2                 | 3                  | 2                  | 2                  | 3                  | 2                  | 3                 | 3                 |
| organized fibrin                       | 0                                | 0                                | 0                                 | 0                                  | 4                                 | 2                                 | organized fibrin                       | 2                  | 2                  | 0                 | 3                  | 2                  | 2                  | 3                  | 2                  | 4                 | 0                 |
| bronchiolitis obliterans               | 4                                | 0                                | 0                                 | 5                                  | 4                                 | 2                                 | bronchiolitis obliterans               | 0                  | 0                  | 0                 | 0                  | 0                  | 0                  | 4                  | 1                  | 4                 | 2                 |
| type II pneumocyte hyperplasia         | 0                                | 2                                | 1                                 | 2                                  | 4                                 | 3                                 | type II pneumocyte hyperplasia         | 2                  | 3                  | 2                 | 3                  | 2                  | 3                  | 4                  | 3                  | 3                 | 3                 |
| lymphocytic infiltrates/perivasculitis | 2                                | 1                                | 1.5                               | 2.5                                | 2                                 | 2                                 | lymphocytic infiltrates/perivasculitis | 2                  | 2                  | 3                 | 2                  | 2                  | 2                  | 2                  | 1                  | 3                 | 2                 |
| aspiration pneumonia                   | 1                                | 0                                | 0                                 | 0                                  | 0                                 | 0                                 | aspiration pneumonia                   | 0                  | 0                  | 0                 | 0                  | 0                  | 0                  | 0                  | 0                  | 0                 | 0                 |
| pleuritis                              | 4                                | 1                                | 2                                 | 2                                  | 4                                 | 5                                 | pleuritis                              | 2                  | 1                  | 2                 | 3                  | 1                  | 1                  | 2                  | 2                  | 4                 | 3                 |
| Lungs-Left Upper Lobe                  |                                  |                                  |                                   |                                    |                                   |                                   | Lungs-Left Upper Lobe                  |                    |                    |                   |                    |                    |                    |                    |                    |                   |                   |
| neutrophil infiltrates                 | 1                                | 2                                | 0                                 | 0                                  | 1                                 | 3                                 | neutrophil infiltrates                 | 4                  | 3                  | 3                 | 4                  | 1                  | 0                  | 0                  | 0                  | 0                 | 0                 |
| lymphocytic infiltrates                | 2                                | 2                                | 1                                 | 1                                  | 1                                 | 1                                 | lymphocytic infiltrates                | 1                  | 1                  | 2                 | 2                  | 2                  | 2                  | 1                  | 2                  | 1                 | 2                 |
| macrophage infiltrates                 | 2                                | 4                                | 1                                 | 2                                  | 2                                 | 3                                 | macrophage infiltrates                 | 4                  | 3                  | 3                 | 4                  | 3                  | 2                  | 1                  | 2                  | 1                 | 2                 |
| airway edema                           | 0                                | 3                                | 0                                 | 0                                  | 0                                 | 0                                 | airway edema                           | 3                  | 2                  | 1                 | 3                  | 1                  | 0                  | 0                  | 0                  | 0                 | 0                 |
| bronchiolitis/peribronchiolitis        | 2                                | 4                                | 0                                 | 1                                  | 2                                 | 3                                 | bronchiolitis/peribronchiolitis        | 2                  | 2                  | 2                 | 3                  | 2                  | 0                  | 1                  | 0                  | 1                 | 1                 |
| thickened alveolar septae              | 0                                | 3                                | 0                                 | 1                                  | 1                                 | 2                                 | thickened alveolar septae              | 3                  | 2                  | 2                 | 0                  | 3                  | 0                  | 0                  | 2                  | 0                 | 2                 |
| organized fibrin                       | 0                                | 3                                | 0                                 | 0                                  | 1                                 | 1                                 | organized fibrin                       | 3                  | 2                  | 0                 | 3                  | 2                  | 0                  | 0                  | 0                  | 0                 | 0                 |
| bronchiolitis obliterans               | 0                                | 0                                | 0                                 | 0                                  | 0                                 | 2                                 | bronchiolitis obliterans               | 0                  | 0                  | 0                 | 0                  | 0                  | 0                  | 0                  | 0                  | 0                 | 0                 |
| type II pneumocyte hyperplasia         | 0                                | 4                                | 0                                 | 1                                  | 1                                 | 2                                 | type II pneumocyte hyperplasia         | 2                  | 0                  | 0                 | 0                  | 4                  | 0                  | 0                  | 2                  | 0                 | 2                 |

|                                        |   |               |   |   |   |               |                                        |               |               |               |               |               |               |               |               |               |               |
|----------------------------------------|---|---------------|---|---|---|---------------|----------------------------------------|---------------|---------------|---------------|---------------|---------------|---------------|---------------|---------------|---------------|---------------|
| lymphocytic infiltrates/perivasculitis | 1 | 2.5           | 1 | 1 | 2 | 2             | lymphocytic infiltrates/perivasculitis | 2             | 2             | 3             | 2             | 2             | 1             | 1             | 1             | 1             | 2             |
| aspiration pneumonia                   | 1 | 0             | 0 | 0 | 0 | 0             | aspiration pneumonia                   | 0             | 0             | 0             | 0             | 0             | 0             | 0             | 0             | 0             | 0             |
| pleuritis                              | 1 | 2             | 1 | 1 | 1 | 2             | pleuritis                              | 3             | 1             | 1             | 2             | 1             | 0             | 1             | 1             | 1             | 1             |
| Lungs-Left Middle Lobe                 |   |               |   |   |   |               | Lungs-Left Middle Lobe                 |               |               |               |               |               |               |               |               |               |               |
| neutrophil infiltrates                 | 1 | 2             | 0 | 0 | 2 | 4             | neutrophil infiltrates                 | 4             | 3             | 3             | 4             | 1             | 0             | 0             | 0             | 0             | 0             |
| lymphocytic infiltrates                | 2 | 2             | 1 | 1 | 1 | 1             | lymphocytic infiltrates                | 1             | 2             | 2             | 2             | 2             | 2             | 1             | 2             | 2             | 1             |
| macrophage infiltrates                 | 2 | 3             | 1 | 2 | 2 | 2             | macrophage infiltrates                 | 4             | 3             | 3             | 4             | 4             | 2             | 2             | 3             | 2             | 2             |
| airway edema                           | 0 | 0             | 0 | 0 | 0 | 1             | airway edema                           | 3             | 1             | 0             | 3             | 1             | 0             | 0             | 0             | 0             | 0             |
| bronchiolitis/peribronchiolitis        | 2 | 3             | 1 | 2 | 1 | 2             | bronchiolitis/peribronchiolitis        | 2             | 1             | 2             | 2             | 1             | 0             | 1             | 0             | 2             | 1             |
| thickened alveolar septae              | 0 | 2             | 0 | 1 | 2 | 2             | thickened alveolar septae              | 3             | 2             | 2             | 3             | 3             | 2             | 2             | 2             | 0             | 0             |
| organized fibrin                       | 0 | 1             | 0 | 0 | 1 | 1             | organized fibrin                       | 3             | 2             | 1             | 3             | 2             | 0             | 0             | 1             | 0             | 1             |
| bronchiolitis obliterans               | 0 | 0             | 0 | 0 | 0 | 0             | bronchiolitis obliterans               | 0             | 0             | 0             | 0             | 0             | 0             | 0             | 0             | 0             | 0             |
| type II pneumocyte hyperplasia         | 0 | 3             | 0 | 1 | 2 | 3             | type II pneumocyte hyperplasia         | 2             | 2             | 1             | 2             | 4             | 1             | 2             | 2             | 1             | 1             |
| lymphocytic infiltrates/perivasculitis | 0 | 2             | 1 | 1 | 1 | 2             | lymphocytic infiltrates/perivasculitis | 2             | 2             | 3             | 2             | 2             | 2             | 1             | 2             | 2             | 1             |
| aspiration pneumonia                   | 2 | 0             | 0 | 0 | 0 | 0             | aspiration pneumonia                   | 2             | 2             | 3             | 2             | 2             | 2             | 1             | 2             | 2             | 1             |
| pleuritis                              | 0 | 1             | 0 | 1 | 1 | 3             | pleuritis                              | 2             | 1             | 1             | 0             | 2             | 1             | 0             | 1             | 1             | 1             |
| Lungs-Left Lower Lobe                  |   |               |   |   |   |               | Lungs-Left Lower Lobe                  |               |               |               |               |               |               |               |               |               |               |
| neutrophil infiltrates                 | 2 | 2             | 0 | 0 | 2 | 4             | neutrophil infiltrates                 | 4             | 4             | 3             | 4             | 1             | 1             | 0             | 0             | 0             | 0             |
| lymphocytic infiltrates                | 2 | 2             | 1 | 1 | 1 | 1             | lymphocytic infiltrates                | 1             | 2             | 2             | 2             | 2             | 2             | 1             | 2             | 2             | 2             |
| macrophage infiltrates                 | 2 | 4             | 1 | 2 | 2 | 3             | macrophage infiltrates                 | 4             | 4             | 3             | 4             | 4             | 3             | 2             | 3             | 2             | 3             |
| airway edema                           | 0 | 3             | 0 | 0 | 0 | 2             | airway edema                           | 4             | 3             | 1             | 2             | 1             | 1             | 0             | 0             | 1             | 0             |
| bronchiolitis/peribronchiolitis        | 2 | 4             | 0 | 2 | 3 | 4             | bronchiolitis/peribronchiolitis        | 3             | 2             | 2             | 3             | 1             | 2             | 1             | 1             | 2             | 1             |
| thickened alveolar septae              | 0 | 2             | 1 | 1 | 2 | 3             | thickened alveolar septae              | 3             | 3             | 2             | 2             | 3             | 3             | 2             | 3             | 1             | 2             |
| organized fibrin                       | 0 | 3             | 0 | 0 | 2 | 2             | organized fibrin                       | 3             | 1             | 1             | 3             | 2             | 3             | 0             | 2             | 1             | 0             |
| bronchiolitis obliterans               | 0 | 0             | 0 | 0 | 4 | 2             | bronchiolitis obliterans               | 2             | 0             | 0             | 0             | 0             | 1             | 1             | 2             | 1             | 0             |
| type II pneumocyte hyperplasia         | 0 | 3             | 1 | 1 | 3 | 3             | type II pneumocyte hyperplasia         | 3             | 3             | 1             | 2             | 5             | 4             | 2             | 3             | 1             | 2             |
| lymphocytic infiltrates/perivasculitis | 1 | 2.5           | 1 | 1 | 2 | 2             | lymphocytic infiltrates/perivasculitis | 2             | 2             | 3             | 2             | 2             | 2             | 1             | 1             | 2             | 2             |
| aspiration pneumonia                   | 1 | 0             | 0 | 0 | 0 | 0             | aspiration pneumonia                   | 0             | 0             | 0             | 0             | 0             | 0             | 0             | 0             | 0             | 0             |
| pleuritis                              | 2 | 1             | 2 | 2 | 1 | 4             | pleuritis                              | 4             | 2             | 1             | 1             | 2             | 1             | 1             | 1             | 1             | 2             |
| Liver                                  |   |               |   |   |   |               | Liver                                  |               |               |               |               |               |               |               |               |               |               |
| hepatocyte degeneration                | 0 | 0             | 0 | 0 | 0 | 0             | hepatocyte degeneration                | 0             | 0             | 0             | 0             | 0             | 0             | 0             | 0             | 0             | 0             |
| glycogen accumulation                  | 1 | 4             | 3 | 3 | 2 | 0             | glycogen accumulation                  | 0             | 0             | 3             | 0             | 2             | 3             | 4             | 4             | 2             | 2             |
| lipidosis                              | 0 | 2             | 0 | 0 | 0 | 2             | lipidosis                              | 2             | 3             | 0             | 1             | 0             | 0             | 2             | 0             | 0             | 0             |
| inflammation                           | 0 | 0             | 0 | 0 | 1 | 1             | inflammation                           | 0             | 1             | 0             | 0             | 0             | 0             | 0             | 0             | 0             | 0             |
| Spleen                                 |   |               |   |   |   |               | Spleen                                 |               |               |               |               |               |               |               |               |               |               |
| inflammation                           | 0 | 0             | 0 | 0 | 0 | 0             | inflammation                           | 0             | 1             | 1             | 0             | 0             | 0             | 0             | 0             | 0             | 0             |
| Kidney                                 |   |               |   |   |   |               | Kidney                                 |               |               |               |               |               |               |               |               |               |               |
| degeneration/necrosis                  | 0 | 0             | 0 | 0 | 0 | 0             | degeneration/necrosis                  | 0             | 0             | 0             | 0             | 0             | 0             | 0             | 0             | 0             | 0             |
| Bladder                                |   |               |   |   |   |               | Bladder                                |               |               |               |               |               |               |               |               |               |               |
|                                        | 0 | 1             | 1 | 0 | 0 | 0             |                                        | 0             | 0             | 0             | 1             | 0             | 1             | 0             | 0             | 1             | 0             |
| Nasal                                  |   |               |   |   |   |               | Nasal                                  |               |               |               |               |               |               |               |               |               |               |
| not collected                          | 3 | not collected | 2 | 1 | 3 | not collected | not collected                          | not collected | not collected | not collected | not collected | not collected | not collected | not collected | not collected | not collected | not collected |
| Brain                                  |   |               |   |   |   |               | Brain                                  |               |               |               |               |               |               |               |               |               |               |
|                                        | 0 | 0             | 0 | 0 | 1 | 0             | Vaccine injection site                 |               |               |               |               |               |               |               |               |               |               |
|                                        |   |               |   |   |   |               | skin                                   |               |               |               |               |               |               |               |               |               |               |
|                                        |   |               |   |   |   |               |                                        | 2             | 0             | 3             | 0             | 0             | 0             | 0             | 0             | 0             | 4             |

Index:  
0 = no lesion  
1 = minimal change  
2 = mild change  
3 = moderate change  
4 = marked change  
5 = severe change

Index:  
0 = no lesion  
1 = minimal change  
2 = mild change  
3 = moderate change  
4 = marked change  
5 = severe change
