# Supplementary material
Source: PubMed Central journal article supplement (PMC6918093)
Supplement: mBio.02994-19-st004.pdf [file mBio.02994-19-st004.pdf]

| Gene symbol  | Gene name                                    | chr_start_end          | Day3 adjusted P-value | Day3 fold change | Day5 adjusted P-value | Day5 fold change | Day7 adjusted P-value | Day7 fold change |
|--------------|----------------------------------------------|------------------------|-----------------------|------------------|-----------------------|------------------|-----------------------|------------------|
| LOC102118714 | 60S ribosomal protein L23a                   | 11 89441228 89441698   | 0.000000              | -12.74           | 0.910687              | -1.04            | 0.000000              | 13.58            |
| MGLL         | monoglyceride lipase isoform X1              | 11 89383882 89517769   | 0.000000              | -3.18            | 0.075024              | -1.43            | 0.000000              | 2.49             |
| PHF24        | PHD finger protein 24 isoform X1             | 15 44176397 44254142   | 0.000000              | -23.13           | 0.000000              | -12.56           | 0.981436              | -1.01            |
| SYN2         | synapsin-2 isoform X2                        | 2 142968548 143209400  | 0.000000              | -4.17            | 0.407480              | -1.38            | 0.114558              | -1.47            |
| FAM162B      | protein FAM162B                              | 4 20768072 20780742    | 0.000000              | 23.50            | 0.000002              | 16.62            | 0.116915              | -2.54            |
| SLITRK5      | SLIT and NTRK-like protein 5                 | 17 70199863 70202739   | 0.000000              | 5.54             | 0.376147              | 1.55             | 0.168188              | 1.68             |
| LOC102142292 |                                              | 2 26306217 26379169    | 0.000000              | -15.78           | 0.000028              | 13.03            | 0.137694              | 2.03             |
| ALAS2        | 5-aminolevulinatase synthase, erythroid-spe  | X 54121306 54138797    | 0.000000              | 10.23            | 0.000003              | 19.11            | 0.514744              | 1.39             |
| HBB          | hemoglobin subunit beta                      | 14 65216148 65217580   | 0.000000              | 10.59            | 0.005897              | 5.66             | 0.691654              | -1.27            |
| GPRCSB       | G-protein coupled receptor family C grou     | 20 19239153 19251458   | 0.000000              | 2.34             | 0.106950              | -1.52            | 0.423865              | -1.17            |
| LOC102140389 | patr class I histocompatibility antigen, B-1 | 4 43067 43502          | 0.000000              | 11.79            | 0.704153              | 1.41             | 0.992051              | -1.01            |
| LOC101925788 |                                              | 16 73941203 73967447   | 0.000000              | 2.01             | 0.005107              | 1.67             | 0.321500              | -1.17            |
| GLRX2        | glutaredoxin 2                               | 1 51279869 51289151    | 0.000000              | -1.91            | 0.528260              | 1.17             | 0.917232              | 1.02             |
| PLD5         | inactive phospholipase D5 isoform X1         | 1 6924114 7341970      | 0.000000              | -3.45            | 0.813398              | -1.15            | 0.225222              | 1.42             |
| LOC107126511 |                                              | 10 29392484 29395450   | 0.000000              | 2.55             | 0.145308              | -1.43            | 0.068356              | -1.35            |
| MAN1C1       | mannosyl-oligosaccharide 1,2-alpha-man       | 1 202581158 202753926  | 0.000000              | 1.45             | 0.137055              | -1.20            | 0.957256              | 1.01             |
| LOC102116582 | protein ZNF365 isoform X1                    | 9 73628639 73652151    | 0.000000              | -3.02            | 0.735924              | 1.15             | 0.095604              | 1.39             |
| LOC102130440 | leukotriene-B(4) omega-hydroxylase 1-lik     | 19 15939173 15962346   | 0.000000              | 3.35             | 0.490438              | 1.38             | 0.823617              | -1.08            |
| LOC107127313 | uncharacterized protein LOC107127313         | 14 52052596 52113987   | 0.000000              | 44.03            | 0.402053              | 2.65             | 0.262693              | -2.57            |
| HERC6        | probable E3 ubiquitin-protein ligase HER     | 5 87489265 87584164    | 0.000000              | -2.17            | 0.059142              | 1.62             | 0.997149              | 1.00             |
| GFRA2        | GDNF family receptor alpha-2                 | 8 21808886 21906970    | 0.000000              | 2.19             | 0.001487              | -1.91            | 0.000000              | 2.23             |
| LFRN1        | leucine-rich repeat and fibronectin type III | 19 39804090 39812066   | 0.000000              | 1.78             | 0.621810              | 1.15             | 0.771876              | 1.06             |
| LOC102136846 | hemoglobin subunit alpha-1/2/3               | 20 143279 143967       | 0.000000              | 6.92             | 0.010719              | 4.90             | 0.620711              | -1.32            |
| FUT1         | galactoside 2-alpha-L-fucosyltransferase 1   | 19 49591980 49593080   | 0.000000              | 4.03             | 0.033099              | 2.86             | 0.491458              | 1.30             |
| LOC102131610 | collagen alpha-2(IV) chain-like              | 19 40617531 40617923   | 0.000000              | -3.50            | 0.601790              | 1.35             | 0.481776              | -1.29            |
| CCDC149      | coiled-coil domain-containing protein 149    | 5 24001628 24068604    | 0.000000              | 1.77             | 0.813275              | -1.08            | 0.009188              | -1.42            |
| LOC107128597 |                                              | 4 1 1724               | 0.000000              | 2.64             | 0.812968              | 1.13             | 0.290246              | -1.33            |
| SMYD2        | N-lysine methyltransferase SMYD2             | 1 72856264 72911321    | 0.000000              | -1.56            | 0.096018              | 1.31             | 0.316644              | -1.13            |
| LOC102143405 | patr class I histocompatibility antigen, A-5 | 4 4639 5905            | 0.000000              | 3.20             | 0.996456              | -1.00            | 0.252869              | -1.45            |
| SPTBN2       | spectrin beta chain, non-erythrocytic 2 iso  | 14 7770272 7806793     | 0.000001              | 2.85             | 0.074334              | -1.96            | 0.001040              | 2.36             |
| ALPL         | alkaline phosphatase, tissue-nonspecific iso | 1 206856558 206880050  | 0.000001              | 3.03             | 0.084795              | 2.09             | 0.911338              | -1.04            |
| CROCC2       | LOW QUALITY PROTEIN: putative cili           | 12 130843557 130931967 | 0.000001              | 8.33             | 0.934271              | -1.13            | 0.138467              | -2.40            |
| LOC107128611 |                                              | 9 39611 49242          | 0.000001              | -7.32            | 0.663275              | 1.51             | 0.561647              | 1.40             |
| NTRK2        | BDNF/NT-3 growth factors receptor isofo      | 15 95490938 95856427   | 0.000001              | 3.82             | 0.521114              | 1.49             | 0.000762              | 2.76             |
| HAL          | histidine ammonia-lyase isoform X2           | 11 99667588 99693352   | 0.000001              | -2.10            | 0.000000              | 3.71             | 0.003373              | 1.72             |
| FCGBP        | IgGfC-binding protein                        | 19 40332064 40438294   | 0.000001              | 9.62             | 0.966785              | -1.07            | 0.844967              | 1.16             |
| USP18        | ubl carboxyl-terminal hydrolase 18 isofo     | 10 32556737 32577920   | 0.000001              | -2.45            | 0.012498              | 2.21             | 0.690186              | 1.12             |
| CAS4         | cas scaffolding protein family member 4 i    | 10 88251964 88298313   | 0.000001              | 1.78             | 0.336148              | 1.27             | 0.023625              | 1.38             |
| GNG10        | guanine nucleotide-binding protein G(I)/G    | 15 25907066 25912691   | 0.000001              | -3.15            | 0.051512              | 2.28             | 0.761992              | 1.12             |
| CD207        | C-type lectin domain family 4 member K       | 13 39030185 39034904   | 0.000001              | -175.33          | 0.211831              | -15.40           | 0.910990              | 1.18             |
| LOC102143672 | Ig kappa chain V-II region RPMI 6410-lik     | 13 18274238 18275146   | 0.000001              | 4.05             | 0.651922              | -1.30            | 0.502643              | -1.26            |
| LOC102132468 | LOW QUALITY PROTEIN: ankyrin rep             | 9 37965217 38066334    | 0.000001              | -86.22           | 0.387765              | 3.24             | 0.533592              | 1.79             |
| C6H5orf49    | uncharacterized protein C5orf49 homolog      | 6 7803910 7822326      | 0.000002              | 4.89             | 0.796230              | -1.27            | 0.073229              | -2.15            |
| PIGF         | phosphatidylinositol-glycan biosynthesis s   | 13 63767752 63801481   | 0.000002              | -1.41            | 0.590771              | 1.09             | 0.866299              | 1.02             |
| NT5C         | 5'(3')-deoxyribonucleotidase, cytosolic typ  | 16 72403986 72405218   | 0.000002              | -1.60            | 0.039798              | -1.44            | 0.582030              | -1.09            |
| F8           | coagulation factor VIII isoform X1           | X 151719232 151918232  | 0.000002              | 2.03             | 0.001815              | 2.10             | 0.951197              | -1.02            |
| LOC107128701 |                                              | 0 8021 12109           | 0.000002              | -3.96            | 0.944149              | 1.07             | 0.138411              | -1.77            |
| IFI44        | interferon-induced protein 44 isoform X2     | 1 148576720 148590215  | 0.000002              | -2.12            | 0.053753              | 1.73             | 0.798030              | 1.07             |
| LOC102146186 | Ig kappa chain V-II region RPMI 6410-lik     | 13 18592285 18593095   | 0.000002              | 4.03             | 0.962212              | -1.05            | 0.040433              | 2.01             |
| P2RX1        | P2X purinoceptor 1 isoform X2                | 16 3832087 3852093     | 0.000002              | 2.06             | 0.001382              | -2.19            | 0.078389              | 1.42             |
| TRIM13       | uncharacterized protein LOC101925265         | 4 30009204 30009263    | 0.000003              | -1.88            | 0.064890              | 1.56             | 0.710680              | -1.08            |
| PIGR         | polymeric immunoglobulin receptor            | 1 65508851 65520918    | 0.000003              | 3.43             | 0.297004              | -1.75            | 0.095629              | 1.77             |
| CXCR1        | C-X-C chemokine receptor type 1              | 12 107808337 107809392 | 0.000003              | 2.73             | 0.480028              | 1.41             | 0.315661              | 1.38             |
| HEBP2        | heme-binding protein 2                       | 4 42732025 42740630    | 0.000003              | -1.68            | 0.248808              | -1.29            | 0.912802              | -1.02            |
| DNA2         | DNA replication ATP-dependent helicase       | 9 67489946 67553997    | 0.000004              | -2.12            | 0.895931              | -1.07            | 0.666982              | 1.11             |
| LOC102127135 | Ig kappa chain V region 3381-like            | 13 17816977 17817500   | 0.000004              | 15.50            | 0.020063              | -6.70            | 0.609581              | 1.43             |
| TACR2        | substance-K receptor isoform X3              | 9 66279636 66291030    | 0.000005              | -10.50           | 0.895927              | -1.23            | 0.577878              | -1.49            |
| PLD4         | phospholipase D4 isoform X1                  | 7 170301927 170309893  | 0.000005              | 2.04             | 0.321766              | -1.39            | 0.009575              | 1.63             |
| NGFR         | tumor necrosis factor receptor superfamily   | 16 34879660 34897945   | 0.000006              | 2.05             | 0.464965              | -1.29            | 0.158713              | 1.35             |
| PAK1         | serine/threonine-protein kinase PAK 1 iso    | 14 72651361 72718586   | 0.000006              | 1.52             | 0.877723              | -1.04            | 0.332791              | 1.13             |
| CISD1        | CDGSH iron-sulfur domain-containing pr       | 9 77865090 77884018    | 0.000006              | -1.50            | 0.012238              | -1.44            | 0.539660              | -1.08            |
| CDK5RAP2     | CDK5 regulatory subunit-associated prote     | 15 16740994 16934592   | 0.000007              | 1.35             | 0.613430              | -1.08            | 0.517746              | -1.06            |
| LOC102122815 | eosinophil cationic protein                  | 7 84449557 84450039    | 0.000008              | -20.91           | 0.068699              | 9.87             | 0.007370              | -8.35            |
| KIAA1147     | uncharacterized protein LOC101926154         | 3 174715088 174735704  | 0.000008              | 1.51             | 0.666384              | 1.10             | 0.717767              | -1.05            |
| RPL23A       | 60S ribosomal protein L23a                   | 16 24969442 24973024   | 0.000009              | 1.60             | 0.379951              | -1.22            | 0.000001              | -1.69            |
| RSPH9        | radial spoke head protein 9 homolog isofo    | 4 126873603 126907521  | 0.000010              | 3.02             | 0.633346              | 1.34             | 0.097485              | -1.72            |
| SOD3         | extracellular superoxide dismutase [Cu-Zn    | 5 23992704 23993426    | 0.000010              | 2.03             | 0.742564              | 1.14             | 0.641584              | -1.12            |
| LOC102115574 | putative golgin subfamily A member 6C        | 2 99340063 99351704    | 0.000010              | -8.50            | 0.792464              | -1.35            | 0.102070              | -2.55            |
| NTF4         | neurotrophin-4                               | 19 49876726 49877358   | 0.000011              | 13.52            | 0.598121              | 1.89             | 0.911742              | -1.11            |
| ISG15        | ubiquitin-like protein ISG15 isoform X1      | 1 227410523 227411535  | 0.000011              | -4.43            | 0.846842              | 1.21             | 0.706477              | -1.22            |
| SDK1         | protein sidekick-1 isoform X2                | 3 38632839 39287934    | 0.000012              | 1.54             | 0.341101              | 1.22             | 0.424432              | 1.12             |
| RTKN2        | rhotekin-2 isoform X1                        | 9 73775448 73852593    | 0.000012              | -2.76            | 0.531421              | 1.38             | 0.966206              | -1.02            |
| TFE3         | trefoil factor 3                             | 3 4453812 4457240      | 0.000012              | 12.35            | 0.978151              | -1.05            | 0.560854              | -1.60            |
| PADI4        | protein-arginine deiminase type-4 isoform    | 1 211133963 211191645  | 0.000012              | 3.24             | 0.024763              | 2.81             | 0.261345              | 1.52             |
| MAL          | uncharacterized protein LOC101926035         | 13 399433 423998       | 0.000012              | -9.99            | 0.000000              | 799.48           | 0.056657              | -4.11            |
| NUDCD2       | uncharacterized protein LOC101926215         | 6 162879868 162886798  | 0.000013              | -1.54            | 0.610898              | 1.13             | 0.072824              | 1.25             |
| ADARB1       | double-stranded RNA-specific editase 1 is    | 3 1520061 1558711      | 0.000015              | 1.82             | 0.550974              | 1.20             | 0.387066              | 1.18             |
| ATG2A        | autophagy-related protein 2 homolog A is     | 14 9633296 9656537     | 0.000015              | 1.40             | 0.335826              | -1.17            | 0.632793              | -1.06            |
| ZDHHC21      | palmitoyltransferase ZDHHC21 isoform 2       | 15 64090784 64142253   | 0.000017              | -2.55            | 0.405278              | 1.46             | 0.316321              | 1.35             |
| MPLKIP       | M-phase-specific PLK1-interacting protei     | 3 80441169 80442662    | 0.000020              | -1.43            | 0.726181              | 1.08             | 0.636004              | 1.06             |
| DCHS1        | protocadherin-16 isoform X1                  | 14 61475714 61494724   | 0.000020              | 1.58             | 0.631386              | 1.13             | 0.561153              | 1.09             |
| NR1D1        | nuclear receptor subfamily 1 group D mem     | 16 51717297 51728204   | 0.000021              | 2.47             | 0.464313              | -1.40            | 0.217201              | 1.43             |
| LOC102137791 | uncharacterized protein LOC102137791 i       | 1 104147670 104157871  | 0.000021              | 1.90             | 0.070565              | 1.55             | 0.001348              | -1.70            |
| PERP         | uncharacterized protein LOC101865419         | 4 42399855 42414876    | 0.000022              | -1.68            | 0.919197              | -1.04            | 0.888522              | 1.03             |
| COQ2         |                                              | 5 51105950 51126831    | 0.000023              | -1.63            | 0.040297              | -1.51            | 0.651965              | 1.08             |
| LOC102140914 | Ig heavy chain V-I region 5-like             | 13 18062924 18063424   | 0.000028              | 28.32            | 0.707828              | 1.84             | 0.158713              | 3.08             |
| ANKRD11      | ankyrin repeat domain-containing protein     | 20 77687869 77738556   | 0.000029              | 1.23             | 0.566440              | -1.07            | 0.188927              | -1.09            |

| Gene symbol  | Gene name                                   | chr_start_end          | Day3 adjusted P-value | Day3 fold change | Day5 adjusted P-value | Day5 fold change | Day7 adjusted P-value | Day7 fold change |
|--------------|---------------------------------------------|------------------------|-----------------------|------------------|-----------------------|------------------|-----------------------|------------------|
| LOC101867462 | uncharacterized protein LOC101867462        | 12 24470776 24518823   | 0.000031              | -2.04            | 0.095290              | 1.67             | 0.339611              | 1.25             |
| TMEFF1       | tomoregulin-1 isoform X1                    | 15 37161114 37260379   | 0.000032              | -2.74            | 0.453986              | 1.47             | 0.794552              | -1.10            |
| ATP6V0A4     | V-type proton ATPase 116 kDa subunit a      | 3 171686569 171751768  | 0.000033              | 2.14             | 0.913369              | 1.06             | 0.252869              | -1.31            |
| LOC102131888 |                                             | 5 15359297 15364486    | 0.000033              | -2.29            | 0.865298              | 1.10             | 0.566852              | 1.18             |
| KDM6B        | lysine-specific demethylase 6B isoform X    | 16 7952119 7960247     | 0.000041              | 1.49             | 0.761411              | -1.08            | 0.620711              | -1.07            |
| PDCD6        | programmed cell death 6                     | 6 23824 88424          | 0.000041              | -1.35            | 0.673961              | 1.08             | 0.275957              | -1.11            |
| CHD3         | chromodomain-helicase-DNA-binding pr        | 16 7994320 8019018     | 0.000043              | 1.35             | 0.165141              | -1.21            | 0.821606              | -1.03            |
| DNAH9        | dynein heavy chain 9, axonemal isoform 2    | 16 11772025 12155703   | 0.000045              | 5.49             | 0.753713              | 1.41             | 0.612719              | -1.36            |
| ANKFN1       | ankyrin repeat and fibronectin type-III do  | 16 41836092 41959748   | 0.000046              | 10.19            | 0.397736              | -2.23            | 0.425410              | -1.65            |
| FAM26E       | protein FAM26E                              | 4 20536859 20541290    | 0.000046              | 1.86             | 0.001007              | 2.09             | 0.380188              | 1.20             |
| CHGA         | chromogranin-A                              | 7 157917011 157928498  | 0.000051              | 13.84            | 0.081368              | -7.50            | 0.061130              | -4.81            |
| C9H10orf88   | uncharacterized protein C10orf88 homolo     | 9 122221583 122240368  | 0.000054              | -1.64            | 0.795840              | 1.09             | 0.956217              | -1.01            |
| SEMA6C       | semaphorin-6C isoform X1                    | 1 100862120 100874474  | 0.000059              | 1.99             | 0.849569              | 1.10             | 0.931662              | -1.03            |
| CPT1C        | carmitine O-palmitoyltransferase 1, brain i | 19 50554283 50583317   | 0.000059              | 1.97             | 0.982409              | -1.01            | 0.056747              | -1.39            |
| CHAC2        | putative glutathione-specific gamma-gluta   | 13 56312272 56319192   | 0.000060              | -2.63            | 0.757184              | 1.20             | 0.941476              | -1.03            |
| LOC102121228 | LOW QUALITY PROTEIN: galactoside            | 19 49497355 49517412   | 0.000068              | 41.61            | 0.491444              | 4.36             | 0.966845              | 1.04             |
| HAUS1        | HAUS augmin-like complex subunit 1          | 18 35755673 35780734   | 0.000073              | -1.39            | 0.097252              | -1.28            | 0.708024              | 1.05             |
| CIC          | protein capicua homolog isoform X1          | 19 42796844 42820040   | 0.000077              | 1.37             | 0.865017              | -1.04            | 0.180724              | 1.15             |
| LOC107126637 |                                             | 11 9732831 9736535     | 0.000078              | -6.75            | 0.990598              | 1.02             | 0.864457              | 1.12             |
| LOC107129712 |                                             | 5 25126555 25134157    | 0.000079              | 1.83             | 0.597155              | 1.20             | 0.375831              | -1.20            |
| RSAD2        | radical S-adenosyl methionine domain-co     | 13 104139404 104163336 | 0.000079              | -3.46            | 0.633857              | 1.41             | 0.825602              | -1.12            |
| TTYH2        | protein twenty homolog 2                    | 16 71447389 71485514   | 0.000080              | -1.97            | 0.034619              | -1.86            | 0.217075              | -1.33            |
| FSD1L        |                                             | 15 32147763 32245264   | 0.000080              | -2.51            | 0.355201              | 1.54             | 0.617763              | -1.18            |
| LOC102133131 | pregnancy zone protein isoform X2           | 11 9437661 9498869     | 0.000084              | 2.07             | 0.000484              | 2.64             | 0.000000              | -3.38            |
| ALG6         | dolichyl pyrophosphate Man9GlcNAc2 al       | 1 163969231 164031809  | 0.000084              | -1.65            | 0.657067              | 1.14             | 0.297738              | 1.20             |
| ADAM28       | disintegrin and metalloproteinase domain-   | 8 24662400 24723223    | 0.000084              | -2.51            | 0.499887              | -1.40            | 0.000203              | 2.49             |
| MKKS         | McKusick-Kaufman/Bardet-Biedl syndro        | 10 52086479 52094753   | 0.000093              | -1.32            | 0.471336              | 1.11             | 0.722233              | -1.04            |
| PFKM         | ATP-dependent 6-phosphofructokinase, n      | 11 46868712 46912188   | 0.000093              | 1.45             | 0.804070              | 1.04             | 0.832052              | -1.03            |
| CAPS         | LOW QUALITY PROTEIN: calceyphosin           | 19 6064880 6066305     | 0.000102              | 2.27             | 0.425291              | 1.41             | 0.505648              | -1.22            |
| LOC102129582 | uncharacterized protein LOC102129582        | 4 160745637 161184286  | 0.000105              | 57.58            | 0.619237              | -3.19            | 0.846354              | 1.31             |
| PLA2G2D      | group IID secretory phospholipase A2        | 1 208298284 208304061  | 0.000116              | -3.28            | 0.416781              | -1.67            | 0.000068              | -3.48            |
| KREMEN1      | kremen protein 1                            | 10 22362781 22410434   | 0.000119              | 1.76             | 0.163696              | 1.46             | 0.864170              | 1.04             |
| BEAN1        | protein BEAN1                               | 20 54543584 54592320   | 0.000119              | -2.03            | 0.245817              | -1.50            | 0.488464              | 1.20             |
| SMPDL3B      | LOW QUALITY PROTEIN: acid sphing            | 1 200265793 200288111  | 0.000120              | -5.09            | 0.343862              | 2.18             | 0.227415              | -1.96            |
| WDR38        | WD repeat-containing protein 38 isoform     | 15 11232445 11236857   | 0.000120              | 12.94            | 0.979696              | -1.06            | 0.346385              | -2.33            |
| GALNT13      | polypeptide N-acetylglucosaminyltransf      | 12 42983412 43196535   | 0.000124              | -3.27            | 0.724454              | 1.30             | 0.860010              | 1.09             |
| SRP19        | signal recognition particle 19 kDa protein  | 6 111624857 111654603  | 0.000127              | -1.36            | 0.860222              | -1.04            | 0.926306              | 1.01             |
| PIAS2        | E3 SUMO-protein ligase PIAS2 isoform X      | 18 34958152 35037660   | 0.000134              | -1.59            | 0.034619              | 1.54             | 0.957048              | 1.01             |
| C1H1orf186   | uncharacterized protein C1orf186 homolo     | 1 64681035 64685184    | 0.000134              | 2.13             | 0.170727              | 1.63             | 0.043862              | 1.56             |
| TTYH1        | protein twenty homolog 1 isoform X2         | 19 55331367 55354272   | 0.000139              | -2.91            | 0.696049              | 1.31             | 0.462644              | -1.35            |
| PI4KA        | phosphatidylinositol 4-kinase alpha isof    | 10 30284089 30413017   | 0.000141              | 1.42             | 0.579596              | 1.12             | 0.583558              | -1.07            |
| TFAP2C       | transcription factor AP-2 gamma isoform     | 10 88496957 88509802   | 0.000157              | 3.97             | 0.853883              | 1.20             | 0.216848              | -1.74            |
| LOC107130946 | Ig lambda chain V-1 region WAH-like         | 10 29199408 29199990   | 0.000163              | 8.80             | 0.000205              | 10.20            | 0.881539              | -1.10            |
| LOC102125495 |                                             | 12 80881046 80957966   | 0.000164              | 2.97             | 0.100314              | 2.58             | 0.965116              | 1.03             |
| SLC24A4      | sodium/potassium/calcium exchanger 4 is     | 7 157296319 157465235  | 0.000164              | 2.15             | 0.576594              | -1.30            | 0.947082              | -1.03            |
| FAM174B      | membrane protein FAM174B                    | 7 73197134 73233739    | 0.000164              | 1.90             | 0.070565              | -1.69            | 0.030526              | 1.57             |
| MPHOSPH6     | M-phase phosphoprotein 6 isoform X1         | 20 70418254 70438946   | 0.000164              | -1.48            | 0.004901              | 1.59             | 0.366641              | 1.14             |
| TMEM64       | transmembrane protein 64 isoform X2         | 8 91798524 91819350    | 0.000164              | -1.73            | 0.019420              | 1.74             | 0.218283              | 1.26             |
| GDF15        | growth/differentiation factor 15            | 19 18823661 18826677   | 0.000164              | -2.31            | 0.244536              | -1.63            | 0.231905              | -1.41            |
| LOC102131260 | uncharacterized protein C11orf86 homolo     | 0 9615 10509           | 0.000164              | -6.84            | 0.159858              | -3.99            | 0.297847              | 2.03             |
| SETD1B       | histone-lysine N-methyltransferase SETD     | 11 125840297 125865743 | 0.000170              | 1.24             | 0.711897              | -1.05            | 0.027239              | 1.17             |
| LOC102117922 |                                             | 16 75529221 75545180   | 0.000170              | -2.03            | 0.199960              | -1.58            | 0.891488              | 1.04             |
| SNCB         | beta-synuclein isoform X3                   | 6 176397474 176406229  | 0.000170              | -9.47            | 0.195465              | 3.76             | 0.965046              | -1.04            |
| ARSI         | arylsulfatase I                             | 6 149646585 149651748  | 0.000178              | 1.88             | 0.261412              | -1.44            | 0.610462              | 1.13             |
| KIAA0141     | death ligand signal enhancer                | 6 141073915 141090129  | 0.000179              | 1.25             | 0.596937              | -1.07            | 0.912951              | -1.01            |
| IL17A        | interleukin-17A                             | 4 118460052 118462891  | 0.000183              | 6.44             | 0.797882              | -1.35            | 0.000029              | 5.21             |
| CLEC10A      | C-type lectin domain family 10 member A     | 16 71066505 7110315    | 0.000183              | 2.84             | 0.196887              | 2.00             | 0.281024              | -1.50            |
| PEG10        | retrotransposon-derived protein PEG10 is    | 3 117323448 117332505  | 0.000186              | 2.02             | 0.002665              | -2.29            | 0.001082              | 1.89             |
| FAM69C       | protein FAM69C                              | 18 5655559 5677025     | 0.000201              | -3.36            | 0.073105              | -2.78            | 0.287701              | 1.60             |
| TMEM41B      | transmembrane protein 41B isoform X1        | 14 58516804 58545602   | 0.000202              | -1.57            | 0.008513              | 1.65             | 0.735404              | -1.06            |
| LOC102122362 |                                             | 1 180395026 180404796  | 0.000202              | 24.71            | 0.910469              | 1.19             | 0.032949              | -4.12            |
| GBP2         | guanylate-binding protein 2                 | 1 138111371 138134131  | 0.000204              | 1.75             | 0.844205              | 1.08             | 0.019319              | 1.50             |
| CBS          | cystathionine beta-synthase                 | 3 3676185 3699585      | 0.000220              | 1.69             | 0.194362              | -1.41            | 0.561590              | 1.12             |
| LOC102124997 | double C2-like domain-containing protein    | 14 6809271 6813882     | 0.000220              | 4.15             | 0.846842              | 1.22             | 0.410824              | -1.53            |
| HACD1        | very-long-chain (3R)-3-hydroxyacyl-CoA      | 9 18152324 18179303    | 0.000225              | -2.05            | 0.778306              | 1.15             | 0.505046              | -1.20            |
| S100A2       | protein S100-A2                             | 1 98310119 98313168    | 0.000226              | -2.60            | 0.589283              | -1.36            | 0.345031              | 1.39             |
| LSAMP        | limbic system-associated membrane prote     | 2 155777451 156447984  | 0.000229              | 2.07             | 0.160711              | 1.66             | 0.851787              | 1.06             |
| GAS6         | growth arrest-specific protein 6            | 17 96240974 96374098   | 0.000229              | 2.05             | 0.664661              | 1.22             | 0.65258               | -1.13            |
| TRIM52       | tripartite motif-containing protein 52 isof | 6 181319691 181323252  | 0.000229              | -1.42            | 0.311393              | 1.21             | 0.829256              | -1.03            |
| LOC102146359 |                                             | 1 218809672 218828528  | 0.000230              | -2.00            | 0.471230              | 1.33             | 0.812552              | -1.08            |
| FDX1         | adrenodoxin, mitochondrial                  | 14 106415982 106451275 | 0.000233              | -1.55            | 0.403479              | 1.22             | 0.274108              | -1.19            |
| DHX38        | pre-mRNA-splicing factor ATP-dependen       | 20 60477823 60494152   | 0.000239              | 1.25             | 0.383161              | -1.12            | 0.717068              | -1.03            |
| LOC102141835 | HLA class I histocompatibility antigen, B   | 4 139566484 139670550  | 0.000246              | -2.99            | 0.814376              | -1.20            | 0.748530              | 1.15             |
| LOC107130744 |                                             | 9 1331786 1337585      | 0.000249              | -2.15            | 0.405840              | -1.45            | 0.098137              | -1.53            |
| CCDC40       | coiled-coil domain-containing protein 40    | 16 77587749 77651466   | 0.000250              | 3.65             | 0.075024              | -3.12            | 0.892493              | -1.08            |
| LOC102141103 | aldo-keto reductase family 1 member C1      | 9 5357415 5371868      | 0.000255              | 3.62             | 0.000010              | 8.79             | 0.000000              | -5.76            |
| LOC102138110 | zinc finger protein 419 isoform X1          | 19 58116218 58122321   | 0.000255              | 2.09             | 0.887997              | -1.08            | 0.081080              | 1.55             |
| DYNC1L1      | cytoplasmic dynein 1 light intermediate cl  | 2 14816891 14846665    | 0.000258              | -1.46            | 0.023242              | 1.47             | 0.109359              | 1.23             |
| PRRC2B       | protein PRRC2B isoform X4                   | 15 7396958 7463964     | 0.000261              | 1.33             | 0.994707              | -1.00            | 0.536390              | 1.07             |
| ZNF397       | zinc finger protein 397                     | 18 46749918 46753990   | 0.000303              | 1.53             | 0.202262              | 1.32             | 0.140710              | 1.25             |
| C2CD5        | C2 domain-containing protein 5 isoform X    | 11 23111312 23204704   | 0.000303              | -1.56            | 0.756286              | 1.10             | 0.184635              | 1.23             |
| TGM7         | protein-glutamine gamma-glutamyltransfe     | 7 20263165 20305635    | 0.000311              | 11.43            | 0.925158              | -1.25            | 0.761118              | 1.37             |
| MYO18A       | unconventional myosin-XVIIIa isoform X      | 16 25355400 25447698   | 0.000311              | 1.26             | 0.336337              | -1.13            | 0.749645              | 1.03             |
| ETFDH        | electron transfer flavoprotein-ubiquinone   | 5 157935694 157973455  | 0.000311              | -1.41            | 0.418541              | -1.17            | 0.423916              | 1.11             |
| STRA6        | stimulated by retinoic acid gene 6 protein  | 7 52200990 52228857    | 0.000313              | 5.39             | 0.112892              | -4.07            | 0.250701              | -1.98            |
| TREH         | trehalase                                   | 14 114673181 114701319 | 0.000314              | 7.96             | 0.006930              | -35.70           | 0.115838              | -3.01            |
| CMPK2        | UMP-CMP kinase 2, mitochondrial             | 13 104171350 104186237 | 0.000316              | -2.21            | 0.015165              | 2.39             | 0.325693              | 1.34             |

| Gene symbol  | Gene name                                    | chr_start_end          | Day3 adjusted P-value | Day3 fold change | Day5 adjusted P-value | Day5 fold change | Day7 adjusted P-value | Day7 fold change |
|--------------|----------------------------------------------|------------------------|-----------------------|------------------|-----------------------|------------------|-----------------------|------------------|
| JRKL         | jerky protein homolog-like                   | 14 92260624 92262198   | 0.000326              | -1.35            | 0.397736              | 1.15             | 0.405129              | 1.10             |
| TF1F1        | transcription termination factor 1 isoform   | 15 6421377 6456641     | 0.000341              | 1.42             | 0.980043              | -1.01            | 0.378875              | -1.12            |
| LRP10        | low-density lipoprotein receptor-related p   | 7 86559408 86565088    | 0.000341              | 1.36             | 0.898156              | -1.03            | 0.832835              | -1.03            |
| NMU          | neuromedin-U                                 | 5 78855826 78881050    | 0.000341              | -4.05            | 0.954772              | -1.08            | 0.178770              | 1.98             |
| ZNF329       | zinc finger protein 329                      | 19 58721484 58723109   | 0.000342              | 1.49             | 0.892366              | -1.04            | 0.786750              | 1.05             |
| KMT2A        | histone-lysine N-methyltransferase 2A iso    | 14 114465745 114516115 | 0.000342              | 1.41             | 0.938898              | 1.02             | 0.366024              | 1.12             |
| MPV17L       | mpv17-like protein isoform X1                | 20 15356979 15368975   | 0.000342              | -4.48            | 0.348039              | -1.84            | 0.559233              | 1.31             |
| UMAD1        | UBAP1-MVB12-associated (UMA)-doma            | 3 113201798 113414355  | 0.000347              | -1.59            | 0.259440              | 1.32             | 0.673937              | 1.08             |
| LOC102143277 | cytochrome P450 2A13-like                    | 0 10359 17815          | 0.000353              | 8.34             | 0.951046              | 1.13             | 0.275483              | -2.35            |
| MYOZ1        | myozenin-1                                   | 9 61901472 61910705    | 0.000354              | 4.65             | 0.886381              | -1.18            | 0.281197              | -1.80            |
| DUT          | deoxyuridine 5'-triphosphate nucleotidoh     | 7 25278401 25289181    | 0.000354              | -1.42            | 0.933686              | 1.03             | 0.787658              | -1.04            |
| ST20         | LOW QUALITY PROTEIN: suppressor of           | 7 58358184 58358398    | 0.000354              | -4.78            | 0.194808              | -3.54            | 0.999883              | -1.00            |
| PAPPA2       | pappalysin-2                                 | 1 34497509 34802128    | 0.000355              | -2.62            | 0.121058              | 1.94             | 0.383960              | 1.31             |
| ETAA1        | ewing's tumor-associated antigen 1 isoform   | 13 42538159 42550958   | 0.000359              | -1.95            | 0.198500              | 1.57             | 0.018682              | 1.66             |
| GP2          | pancreatic secretory granule membrane m      | 20 19720730 19735893   | 0.000361              | 25.02            | 0.948058              | 1.26             | 0.708461              | -1.65            |
| LOC102115890 | 60S ribosomal protein L29-like               | X 41376785 41377258    | 0.000363              | 1.41             | 0.629019              | -1.11            | 0.402496              | -1.11            |
| LOC102144847 | aflatoxin B1 aldehyde reductase member       | 1 209151313 209157326  | 0.000363              | -2.31            | 0.000362              | 3.46             | 0.254015              | -1.42            |
| SIKE1        | suppressor of IKBKE 1 isoform X1             | 1 111971831 111978473  | 0.000365              | -1.27            | 0.545091              | 1.09             | 0.677501              | 1.04             |
| LOC107127548 |                                              | 15 110035722 110043001 | 0.000365              | -2.57            | 0.015165              | -2.49            | 0.274899              | -1.53            |
| ST18         | suppression of tumorigenicity 18 protein     | 8 53073027 53180048    | 0.000365              | -5.55            | 0.043644              | -4.79            | 0.399524              | -1.61            |
| SLN          | sarcophilin                                  | 14 103759186 103759281 | 0.000365              | -10.50           | 0.021165              | 10.49            | 0.581343              | -1.54            |
| CSPG5        | chondroitin sulfate proteoglycan 5 (neuro    | 2 102603560 102619246  | 0.000389              | -2.18            | 0.297930              | -1.55            | 0.741799              | 1.11             |
| SLC26A4      | pendrin isoform X1                           | 3 140134819 140186708  | 0.000395              | 2.66             | 0.079323              | 2.55             | 0.629449              | -1.23            |
| LOC10210647  | dnaJ homolog subfamily C member 25           | 15 25921720 25941509   | 0.000399              | -1.44            | 0.763188              | -1.08            | 0.541410              | -1.09            |
| NCOA1        | nuclear receptor coactivator 1 isoform X2    | 13 86161744 86277561   | 0.000401              | 1.38             | 0.783896              | 1.06             | 0.909354              | -1.02            |
| IDO2         | indoleamine 2,3-dioxygenase 2 isoform X      | 8 40902293 40971342    | 0.000401              | -5.96            | 0.298232              | -2.89            | 0.707335              | 1.33             |
| MFF          | mitochondrial fission factor isoform X3      | 12 117124905 117152376 | 0.000406              | -1.42            | 0.488187              | 1.15             | 0.487056              | -1.10            |
| CRYM         | crystallin, mu                               | 20 20552356 20572114   | 0.000406              | 6.43             | 0.092349              | -3.56            | 0.419209              | -1.63            |
| LOC102139130 | putative V-set and immunoglobulin doma       | 0 582317 590785        | 0.000414              | 5.21             | 0.024207              | -5.17            | 0.676952              | 1.31             |
| LOC102121357 |                                              | 12 2936188 2949229     | 0.000424              | -93.16           | 0.467295              | -7.71            | 0.903446              | 1.34             |
| RAPGEFL1     | rap guanine nucleotide exchange factor-lil   | 16 51813841 51830415   | 0.000425              | 1.95             | 0.064805              | -1.83            | 0.101037              | -1.48            |
| FKBP3        | uncharacterized protein LOC101866842         | 7 109372716 109390851  | 0.000425              | -1.37            | 0.958714              | 1.02             | 0.340464              | 1.12             |
| TMEM108      | transmembrane protein 108                    | 2 35447984 35596367    | 0.000435              | 1.93             | 0.237744              | 1.51             | 0.847861              | -1.06            |
| CTBP2        | C-terminal-binding protein 2 isoform X1      | 9 124311696 124361423  | 0.000454              | -1.18            | 0.006589              | 1.22             | 0.829390              | 1.02             |
| NFATC1       | nuclear factor of activated T-cells, cytopla | 18 746617 867559       | 0.000463              | 1.36             | 0.592163              | -1.11            | 0.312343              | -1.13            |
| LOC102141215 |                                              | 14 125340069 125366150 | 0.000471              | -3.34            | 0.298899              | 1.76             | 0.926290              | 1.05             |
| CEPT1        | choline/ethanolaminephosphotransferase 1     | 1 115567530 115604654  | 0.000471              | -1.56            | 0.896708              | 1.05             | 0.669782              | 1.08             |
| POLR1E       | DNA-directed RNA polymerase I subunit        | 15 41487990 41505707   | 0.000474              | 1.51             | 0.748794              | 1.10             | 0.734374              | 1.06             |
| CC2D2A       | coiled-coil and C2 domain-containing pro     | 5 14570989 14698886    | 0.000480              | 1.57             | 0.856620              | 1.07             | 0.668883              | -1.08            |
| GALNT14      | polypeptide N-acetylgalactosaminyltransf     | 13 79602233 79828393   | 0.000485              | 5.77             | 0.514722              | 2.03             | 0.446095              | 1.67             |
| ELMOD2       | ELMO domain-containing protein 2             | 5 139870132 139895151  | 0.000493              | -1.65            | 0.486698              | 1.23             | 0.164883              | 1.29             |
| WARS         | tryptophan--rRNA ligase, cytoplasmic iso     | 7 165544958 165584367  | 0.000499              | 1.51             | 0.018714              | 1.57             | 0.133760              | 1.25             |
| LOC102143771 |                                              | 20 40893884 40904879   | 0.000502              | 5.54             | 0.501468              | -2.03            | 0.625402              | -1.41            |
| PIEZO2       | piezo-type mechanosensitive ion channel      | 18 72501058 72976170   | 0.000506              | 1.82             | 0.778065              | -1.13            | 0.277642              | 1.28             |
| LOC102132408 | HLA class I histocompatibility antigen, B    | 0 11364 13956          | 0.000506              | 1.59             | 0.893142              | -1.05            | 0.641584              | -1.09            |
| LOC102135104 | olfactory receptor 6K3-like                  | 1 92963707 92971868    | 0.000506              | -3.92            | 0.173656              | 2.64             | 0.812259              | -1.15            |
| HERC5        | E3 ISG15--protein ligase HERC5               | 5 87598648 87649310    | 0.000526              | -2.81            | 0.160902              | 2.16             | 0.583071              | 1.26             |
| PI4K2B       | phosphatidylinositol 4-kinase type 2-beta    | 5 24440434 24473310    | 0.000536              | -1.57            | 0.404319              | 1.24             | 0.273238              | 1.21             |
| LOC102130606 |                                              | 20 75925210 75954376   | 0.000544              | -1.66            | 0.649812              | -1.16            | 0.036499              | -1.43            |
| FANCL        | E3 ubiquitin-protein ligase FANCL isoform    | 13 51855731 51939585   | 0.000557              | -1.71            | 0.653994              | 1.17             | 0.391657              | 1.20             |
| PTRPF        | receptor-type tyrosine-protein phosphatase   | 1 183992055 184070621  | 0.000561              | 1.55             | 0.760043              | -1.10            | 0.131268              | -1.27            |
| BCAT1        | branched-chain-amino-acid aminotransfer      | 11 25465067 25597469   | 0.000564              | -1.87            | 0.602573              | 1.23             | 0.430027              | 1.21             |
| STYXL1       | uncharacterized protein LOC101926045         | 3 47324526 47363886    | 0.000566              | 1.94             | 0.987051              | -1.01            | 0.088621              | -1.40            |
| ELMOD2       | ELMO domain-containing protein 2             | 5 139870132 139895151  | 0.000566              | 1.37             | 0.893586              | 1.04             | 0.738855              | -1.05            |
| RIBC2        | uncharacterized protein LOC101926386         | 10 5543552 5564620     | 0.000577              | 4.18             | 0.831558              | -1.30            | 0.293571              | -1.84            |
| RPP40        | ribonuclease P protein subunit p40           | 4 166020577 166029147  | 0.000581              | -1.64            | 0.047221              | 1.63             | 0.015242              | -1.48            |
| FEZ1         | uncharacterized protein LOC101866156         | 14 121268620 121313043 | 0.000608              | 1.71             | 0.772415              | 1.12             | 0.647245              | 1.11             |
| LOC102115032 | uncharacterized protein LOC102115032         | 14 114711264 114713665 | 0.000614              | 5.06             | 0.007392              | -10.09           | 0.462554              | -1.58            |
| ZNF618       | zinc finger protein 618 isoform X21          | 15 23531871 23589526   | 0.000628              | 1.60             | 0.584741              | -1.18            | 0.427611              | 1.16             |
| MZT1         | mitotic-spindle organizing protein 1         | 17 55088563 55106551   | 0.000631              | -1.97            | 0.031991              | 2.01             | 0.653550              | 1.14             |
| SNX16        | sorting nexin-16 isoform X2                  | 8 82970108 83008771    | 0.000637              | -1.87            | 0.019972              | 2.02             | 0.518952              | 1.18             |
| LOC102142698 |                                              | 10 8926183 8964636     | 0.000637              | 1.42             | 0.285295              | -1.23            | 0.837772              | 1.03             |
| LOC107130469 |                                              | 7 152783824 152837771  | 0.000637              | -2.25            | 0.121136              | 1.91             | 0.524514              | 1.23             |
| CSF3         | granulocyte colony-stimulating factor        | 16 51631903 51633184   | 0.000658              | 4.57             | 0.886381              | -1.33            | 0.527377              | -1.60            |
| ZZEF1        | zinc finger ZZ-type and EF-hand domain-      | 16 3949084 4101311     | 0.000658              | 1.16             | 0.105866              | -1.14            | 0.289603              | -1.06            |
| OPN3         | opsin-3                                      | 1 7815986 7863086      | 0.000661              | -1.65            | 0.248808              | 1.37             | 0.824848              | -1.05            |
| TMEM14C      | transmembrane protein 14C                    | 4 160132665 160138722  | 0.000674              | -1.25            | 0.130731              | -1.19            | 0.740899              | 1.03             |
| NF2          | merlin isoform X3                            | 10 21783709 21889232   | 0.000678              | 1.21             | 0.456231              | -1.09            | 0.627187              | -1.04            |
| LOC107128255 |                                              | 19 36785306 36787640   | 0.000682              | 7.15             | 0.904043              | 1.22             | 0.549559              | -1.61            |
| NDUFC1       | NADH dehydrogenase [ubiquinone] 1 sub        | 5 138607161 138610355  | 0.000682              | -1.29            | 0.838962              | -1.04            | 0.965303              | -1.01            |
| LOC107130876 |                                              | 9 97279153 97285747    | 0.000692              | -3.57            | 0.596937              | -1.51            | 0.527174              | -1.35            |
| TMEM38B      | trimeric intracellular cation channel type B | 15 31941573 32017245   | 0.000698              | -1.97            | 0.904679              | -1.07            | 0.673650              | 1.13             |
| LOC101866998 | protein very KIND                            | 9 132681393 132708056  | 0.000709              | 3.55             | 0.848710              | -1.24            | 0.757686              | -1.18            |
| LOC107130656 |                                              | 8 96216429 96225732    | 0.000709              | 2.56             | 0.076923              | -2.28            | 0.533567              | -1.28            |
| PRKD2        | serine/threonine-protein kinase D2           | 19 47428654 47483817   | 0.000721              | 1.36             | 0.993119              | 1.00             | 0.372535              | 1.11             |
| AK8          | adenylate kinase 8 isoform X1                | 15 5916085 6078631     | 0.000730              | 2.42             | 0.537855              | -1.42            | 0.003025              | -2.32            |
| RHEBL1       | GTPase RhebL1 isoform X1                     | 11 47896626 47903279   | 0.000730              | 1.92             | 0.775061              | 1.15             | 0.658110              | 1.13             |
| LOC107127144 |                                              | 13 73475887 73483590   | 0.000737              | -1.37            | 0.688154              | 1.09             | 0.180615              | 1.17             |
| NRAS         | neuroblastoma RAS viral (v-ras) oncogen      | 1 112035825 112043934  | 0.000743              | -1.25            | 0.016950              | 1.29             | 0.663640              | -1.04            |
| SYNE1        | nesprin-1 isoform X9                         | 4 58316129 58865714    | 0.000746              | 1.47             | 0.444023              | -1.19            | 0.951616              | -1.01            |
| LOC102116245 | uncharacterized protein LOC102116245 i       | 12 1454759 1460909     | 0.000752              | -33.10           | 0.351804              | -7.77            | 0.741997              | -1.60            |
| DNAH3        | dynein heavy chain 3, axonemal isoform       | 20 20222782 20428807   | 0.000766              | 6.02             | 0.979402              | -1.05            | 0.329883              | -2.02            |
| MRGPRE       | mas-related G-protein coupled receptor m     | 14 3194657 3195592     | 0.000786              | 53.85            | 0.753407              | -2.92            | 0.493383              | 3.57             |
| LOC107130363 | T-cell receptor alpha chain V region PY1     | 7 85475329 85475862    | 0.000786              | 3.25             | 0.035299              | 3.04             | 0.628640              | -1.23            |
| ZNF706       | zinc finger protein 706                      | 8 102344592 102346353  | 0.000786              | -1.35            | 0.906596              | 1.03             | 0.329694              | 1.12             |
| EREG         | proepiregulin                                | 5 60093499 60112810    | 0.000787              | -4.36            | 0.044799              | -4.30            | 0.056657              | -2.68            |
| FCHO1        | F-BAR domain only protein 1                  | 19 18103669 18133813   | 0.000795              | 1.61             | 0.424752              | -1.25            | 0.167107              | 1.27             |



| Gene symbol  | Gene name                                    | chr_start_end          | Day3 adjusted P-value | Day3 fold change | Day5 adjusted P-value | Day5 fold change | Day7 adjusted P-value | Day7 fold change |
|--------------|----------------------------------------------|------------------------|-----------------------|------------------|-----------------------|------------------|-----------------------|------------------|
| UCHL5        | ubiquitin carboxyl-terminal hydrolase iso    | 1 51193207 51244361    | 0.000803              | -1.59            | 0.483580              | 1.22             | 0.584372              | 1.11             |
| CAPSL        | calcipodin-like protein                      | 6 36299999 36312920    | 0.000810              | 2.97             | 0.148746              | -2.38            | 0.295996              | -1.56            |
| EPT1         | ethanolaminephosphotransferase 1             | 13 84501776 84543732   | 0.000813              | -1.40            | 0.881859              | -1.04            | 0.722209              | -1.05            |
| LOC107129085 |                                              | 3 21413448 21426719    | 0.000813              | -3.47            | 0.421102              | 1.82             | 0.907242              | -1.07            |
| NLRP1        | NACHT, LRR and PYD domains-contain           | 16 5605368 5607834     | 0.000815              | 2.81             | 0.794819              | 1.22             | 0.750213              | 1.16             |
| SNX14        | sorting nexin-14 isoform X1                  | 4 88240920 88335293    | 0.000822              | -1.32            | 0.652026              | 1.09             | 0.896263              | 1.02             |
| LOC107130732 |                                              | 8 143618329 143620752  | 0.000822              | -7.78            | 0.731200              | 1.53             | 0.220999              | -2.26            |
| TTC25        | tetratricopeptide repeat protein 25          | 16 53630260 53673135   | 0.000832              | 2.68             | 0.966170              | -1.05            | 0.219818              | -1.60            |
| EMC9         | ER membrane protein complex subunit 9        | 7 87918925 87921214    | 0.000832              | -1.62            | 0.092740              | -1.51            | 0.789341              | -1.06            |
| FAM96A       | MIP18 family protein FAM96A                  | 7 41452074 41487573    | 0.000832              | -1.64            | 0.943002              | 1.03             | 0.770902              | 1.07             |
| COMMD8       | COMM domain-containing protein 8 isofo       | 5 47466374 47478398    | 0.000840              | -1.87            | 0.359513              | 1.40             | 0.320813              | 1.28             |
| LOC102142617 | HLA class I histocompatibility antigen, B    | 4 139547846 139570349  | 0.000857              | -2.05            | 0.739075              | 1.19             | 0.360673              | 1.30             |
| LOC107129932 | uncharacterized protein LOC107129932         | 6 43591540 43591977    | 0.000866              | 3.25             | 0.042720              | 3.44             | 0.999183              | -1.00            |
| SPATC1L      | speriolin-like protein isoform X1            | 3 610155 637451        | 0.000881              | -4.48            | 0.514352              | -1.71            | 0.001507              | 3.95             |
| SMIM5        | small integral membrane protein 5            | 16 72948214 72948910   | 0.000886              | 2.14             | 0.958714              | 1.04             | 0.622280              | -1.18            |
| NYNRIN       | protein NYNRIN                               | 7 88187067 88205873    | 0.000886              | 1.85             | 0.149512              | 1.61             | 0.865770              | -1.05            |
| FCRL5        | Fc receptor-like protein 5 isoform X1        | 1 94169746 94204301    | 0.000886              | 2.37             | 0.032428              | 2.45             | 0.019582              | 1.97             |
| TRMO         | nef-associated protein 1 isoform X2          | 15 39856766 39882002   | 0.000888              | -1.22            | 0.391542              | 1.11             | 0.911278              | -1.01            |
| LYRM4        | LYR motif-containing protein 4 isoform X     | 4 165724013 165877090  | 0.000892              | -1.41            | 0.856564              | -1.05            | 0.009535              | -1.35            |
| CTLA4        | cytotoxic T-lymphocyte protein 4 isoform     | 12 93413167 93418043   | 0.000900              | 2.51             | 0.605538              | -1.36            | 0.604891              | 1.22             |
| GNPAT        | dihydroxyacetone phosphate acyltransfera     | 1 18278862 18314025    | 0.000920              | -1.22            | 0.739874              | 1.05             | 0.282348              | -1.09            |
| LYZ          | lysozyme C                                   | 11 68408725 68414175   | 0.000920              | -2.05            | 0.193947              | 1.67             | 0.720965              | -1.12            |
| CLIC6        | LOW QUALITY PROTEIN: chloride intr           | 3 12065565 12110825    | 0.000924              | 4.64             | 0.160502              | -3.64            | 0.667948              | -1.32            |
| LOC102130734 | alpha-2-macroglobulin isoform X2             | 11 9354548 9400801     | 0.000924              | 1.43             | 0.001123              | -1.67            | 0.298630              | -1.16            |
| LOC102121775 | class I histocompatibility antigen, Gogo-B   | 0 3965 5050            | 0.000925              | -3.68            | 0.161205              | -2.69            | 0.000239              | 4.30             |
| CLEC12B      | C-type lectin domain family 12 member B      | 11 10352116 10360122   | 0.000929              | 7.19             | 0.847395              | 1.42             | 0.708865              | -1.38            |
| SUSD1        | sushi domain-containing protein 1 isoform    | 15 25391276 25533823   | 0.000930              | 1.41             | 0.632848              | -1.12            | 0.402502              | 1.12             |
| PAPD5        | non-canonical poly(A) RNA polymerase I       | 20 37953938 38040309   | 0.000940              | -1.64            | 0.269302              | 1.37             | 0.059880              | 1.00             |
| EPS8L3       | epidermal growth factor receptor kinase s    | 1 116979052 116990366  | 0.000967              | 24.79            | 1.000000              | -1.07            | 0.903352              | 1.23             |
| SF3A1        | splicing factor 3A subunit 1                 | 10 21104649 21125862   | 0.000967              | 1.36             | 0.395208              | -1.17            | 0.734133              | 1.05             |
| LOC107130949 | Ig lambda chain V-1 region BL2-like          | 10 29241652 29245641   | 0.000979              | 5.28             | 0.775645              | 1.41             | 0.994007              | -1.01            |
| RPP30        | ribonuclease P protein subunit p30 isoform   | 9 89416069 89446239    | 0.000984              | -1.41            | 0.956488              | -1.02            | 0.905322              | -1.02            |
| LOC107129249 |                                              | 1 59220902 59228233    | 0.000986              | 2.81             | 0.000484              | -3.71            | 0.067672              | 1.71             |
| WDR63        | WD repeat-containing protein 63              | 1 142112010 142176293  | 0.000986              | 2.39             | 0.560573              | 1.40             | 0.825448              | 1.09             |
| LOC107130954 | uncharacterized protein LOC107130954         | 10 230906 247780       | 0.000991              | 1.77             | 0.999136              | 1.00             | 0.002484              | 1.75             |
| SRGAP3       | SLIT-ROBO Rho GTPase-activating prot         | 2 139957961 140223237  | 0.000991              | 1.75             | 0.965362              | -1.03            | 0.116915              | 1.37             |
| TMEM14A      | transmembrane protein 14A isoform X2         | 4 117948759 117963681  | 0.001014              | -1.45            | 0.525948              | 1.16             | 0.174815              | -1.21            |
| VAPA         | vesicle-associated membrane protein-asso     | 18 71058878 71098766   | 0.001018              | -1.27            | 0.791391              | 1.05             | 0.409687              | -1.09            |
| LOC102130729 |                                              | 10 82102673 82123881   | 0.001018              | -2.08            | 0.827976              | -1.15            | 0.581822              | -1.20            |
| EPHB6        | ephrin type-B receptor 6 isoform X1          | 3 176128932 176137041  | 0.001018              | 1.85             | 0.719964              | 1.17             | 0.988815              | -1.00            |
| TTC28        | tetratricopeptide repeat protein 28 isoform  | 10 22836225 23546164   | 0.001064              | 1.62             | 0.579087              | 1.19             | 0.677555              | 1.09             |
| ZCCHC9       | zinc finger CCHC domain-containing pro       | 6 79576329 79583862    | 0.001064              | -1.23            | 0.857309              | -1.03            | 0.309841              | 1.09             |
| SFT2D1       | vesicle transport protein SFT2A              | 4 4419757 4442168      | 0.001064              | -1.32            | 0.853115              | -1.04            | 0.601392              | 1.06             |
| SKP2         | S-phase kinase-associated protein 2 isoform  | 6 36565890 36595851    | 0.001064              | -1.46            | 0.279752              | 1.27             | 0.657119              | 1.08             |
| MX2          | interferon-induced GTP-binding protein M     | 3 5341292 5370474      | 0.001064              | -2.34            | 0.343862              | 1.62             | 0.783397              | 1.11             |
| RASSF10      | ras association domain-containing protein    | 14 54727453 54728979   | 0.001064              | 4.08             | 0.883028              | 1.25             | 0.169107              | 2.02             |
| ANKMY1       | ankyrin repeat and MYND domain-contain       | 12 130337730 130428524 | 0.001064              | 2.55             | 0.643752              | -1.35            | 0.699274              | -1.17            |
| SLCSA6       | sodium-dependent multivitamin transport      | 13 83655185 83662383   | 0.001070              | -1.53            | 0.002427              | -1.79            | 0.965046              | 1.01             |
| CCDC146      | coiled-coil domain-containing protein 146    | 3 134988488 135145443  | 0.001074              | 4.04             | 0.956039              | -1.08            | 0.882032              | -1.11            |
| FXD6         | FXD domain-containing ion transport re       | 14 113804736 113807739 | 0.001074              | -2.22            | 0.083071              | 2.03             | 0.589313              | 1.20             |
| EXOC1        | exocyst complex component 1 isoform X        | 5 78556210 78605184    | 0.001074              | -1.38            | 0.768581              | 1.07             | 0.375831              | 1.12             |
| CCDC180      | LOW QUALITY PROTEIN: coiled-coil d           | 15 40397358 40482663   | 0.001087              | 3.35             | 0.156569              | -2.56            | 0.635123              | -1.28            |
| GOPC         | Golgi-associated PDZ and coiled-coil mo      | 4 21543266 21581537    | 0.001109              | -1.65            | 0.348271              | 1.32             | 0.599448              | 1.12             |
| C15Horf116   | UPF0691 protein C9orf116 homolog isofo       | 15 2861153 2865669     | 0.001120              | 2.65             | 0.830334              | -1.13            | 0.191154              | -1.66            |
| LOC107129018 |                                              | 2 192381975 192408233  | 0.001120              | -16.29           | 0.872607              | -1.37            | 0.320922              | -3.06            |
| DRAM2        | DNA damage-regulated autophagy modul         | 1 115620550 115635167  | 0.001124              | -1.47            | 0.855754              | -1.06            | 0.737854              | 1.06             |
| CD47         | leukocyte surface antigen CD47 isoform X     | 2 164116932 164161544  | 0.001130              | -1.32            | 0.798468              | 1.06             | 0.734816              | -1.04            |
| CFAP73       | coiled-coil domain-containing protein 42f    | 11 116869825 116877455 | 0.001153              | 5.38             | 0.831558              | -1.36            | 0.771476              | 1.25             |
| PTGDR2       | prostaglandin D2 receptor 2                  | 14 13433784 13434974   | 0.001186              | 4.06             | 0.303510              | 2.38             | 0.753431              | 1.22             |
| MAP1A        | microtubule-associated protein 1A isoform    | 7 20495690 20515254    | 0.001189              | 2.03             | 0.772467              | -1.17            | 0.372556              | 1.29             |
| MDH1B        | putative malate dehydrogenase 1B isoform     | 12 96329151 96388226   | 0.001205              | 3.13             | 0.929680              | 1.10             | 0.448501              | -1.44            |
| TRPM3        | transient receptor potential cation channel  | 15 81286273 81869069   | 0.001205              | 2.04             | 0.987179              | 1.01             | 0.854462              | 1.07             |
| EEF2         | elongation factor 2                          | 19 3986855 3995761     | 0.001208              | 1.32             | 0.212590              | -1.22            | 0.786692              | 1.04             |
| EPSTH1       | epithelial-stromal interaction protein 1 iso | 17 21943708 22168112   | 0.001223              | -1.71            | 0.493099              | -1.26            | 0.677559              | -1.10            |
| MUC16        | mucin-16                                     | 19 9152484 9300476     | 0.001240              | 6.17             | 0.289034              | 3.21             | 0.137694              | -2.83            |
| STRADB       | STE20-related kinase adapter protein beta    | 12 90823268 90848987   | 0.001277              | -1.43            | 0.958643              | -1.02            | 0.174843              | -1.21            |
| PDCD1        | programmed cell death 1                      | 12 131836451 131844230 | 0.001315              | 2.21             | 0.811321              | -1.14            | 0.048724              | 1.63             |
| LOC102136652 | arachidonate 12-lipoxygenase, 12S-type       | 16 7024410 7039468     | 0.001321              | 3.46             | 0.968746              | 1.05             | 0.024515              | -2.61            |
| DEGS2        | sphingolipid delta(4)-desaturase/C4-mono     | 7 165341301 165353725  | 0.001342              | 3.51             | 0.576398              | -1.62            | 0.165348              | -2.02            |
| LOC102124892 |                                              | 8 8302648 8308210      | 0.001351              | 25.77            | 0.048507              | 27.28            | 0.044371              | -6.87            |
| SLC38A9      | sodium-coupled neutral amino acid transp     | 6 55085208 55158585    | 0.001351              | -1.51            | 0.792304              | 1.09             | 0.957256              | -1.01            |
| XKR8         | XK-related protein 8                         | 1 200257410 200264546  | 0.001380              | -1.35            | 0.825061              | 1.06             | 0.922723              | -1.02            |
| SNN          | stannin isoform X1                           | 20 11950936 11953586   | 0.001383              | 1.46             | 0.813684              | -1.07            | 0.640607              | -1.08            |
| FERMT1       | fermitin family homolog 1 isoform X1         | 10 56367974 56417997   | 0.001414              | 7.71             | 0.702314              | 1.87             | 0.952455              | -1.06            |
| NUP214       | nuclear pore complex protein Nup214 iso      | 15 7727616 7840219     | 0.001414              | 1.19             | 0.945926              | -1.01            | 0.591473              | -1.04            |
| CREBZF       | CREB/ATF bZIP transcription factor isofo     | 14 81233122 81234408   | 0.001414              | -1.84            | 0.390165              | 1.38             | 0.642964              | 1.13             |
| LRR6C66      | leucine-rich repeat-containing protein 66    | 5 82498733 82528501    | 0.001416              | -3.95            | 0.870757              | -1.21            | 0.823804              | 1.16             |
| RAB36        | ras-related protein Rab-36 isoform X4        | 10 28154521 28171595   | 0.001423              | 2.72             | 0.641526              | 1.43             | 0.817276              | -1.13            |
| LOC102145967 |                                              | 1 142751425 142759908  | 0.001460              | -1.28            | 0.920988              | 1.02             | 0.930957              | -1.01            |
| UBA3         | NEDD8-activating enzyme E1 catalytic su      | 2 124708843 124733015  | 0.001460              | -1.41            | 0.336068              | 1.22             | 0.296854              | 1.16             |
| LILRB4       | leukocyte immunoglobulin-like receptor s     | 19 55567445 55572105   | 0.001460              | -3.50            | 0.172462              | -2.62            | 0.561450              | -1.37            |
| SETD2        | histone-lysine N-methyltransferase SETD      | 2 102015996 102132663  | 0.001489              | 1.25             | 0.535716              | -1.10            | 0.703160              | -1.04            |
| EIF4EBP1     | eukaryotic translation initiation factor 4E- | 8 38839141 38871050    | 0.001489              | -1.63            | 0.180146              | -1.45            | 0.932755              | -1.02            |
| KRT14        | keratin, type I cytoskeletal 14              | 16 53240832 53245172   | 0.001497              | 4.99             | 0.410375              | 2.50             | 0.007713              | -5.87            |
| PLBD1        | phospholipase B-like 1                       | 11 15123279 15177823   | 0.001497              | 1.55             | 0.875639              | 1.06             | 0.921411              | 1.02             |
| LOC102136483 | uncharacterized protein LOC102136483         | 0 302270 306066        | 0.001512              | 3.30             | 0.050408              | 3.22             | 0.398889              | 1.48             |
| RBM23        | probable RNA-binding protein 23 isoform      | 7 86592563 86604028    | 0.001518              | 1.23             | 0.388442              | -1.12            | 0.910890              | -1.01            |

| Gene symbol  | Gene name                                   | chr_start_end          | Day3 adjusted P-value | Day3 fold change | Day5 adjusted P-value | Day5 fold change | Day7 adjusted P-value | Day7 fold change |
|--------------|---------------------------------------------|------------------------|-----------------------|------------------|-----------------------|------------------|-----------------------|------------------|
| LOC102129505 |                                             | 16 13228987 13389092   | 0.001554              | 2.36             | 0.042671              | 2.72             | 0.548528              | 1.26             |
| RNLS         | renalase isoform X4                         | 9 86836516 87155622    | 0.001554              | -1.68            | 0.277856              | 1.39             | 0.168448              | -1.32            |
| CDK2AP1      | uncharacterized protein LOC101866723        | 11 127553295 127560774 | 0.001567              | -1.57            | 0.580925              | 1.19             | 0.464145              | 1.15             |
| CISH         | cytokine-inducible SH2-containing protein   | 2 105859945 105863780  | 0.001583              | 1.61             | 0.318241              | 1.34             | 0.187678              | -1.28            |
| LOC107126497 |                                             | 9 37771250 37797915    | 0.001589              | -31.45           | 0.919325              | 1.32             | 0.488464              | 2.37             |
| BAHCC1       | BAH and coiled-coil domain-containing p     | 16 79041811 79079675   | 0.001600              | 1.50             | 0.116618              | -1.42            | 0.901031              | -1.03            |
| SMIM3        | small integral membrane protein 3           | 6 150137678 150137860  | 0.001601              | -1.26            | 0.000151              | 1.48             | 0.433208              | 1.08             |
| LOC102142342 |                                             | 20 67946451 68041688   | 0.001611              | 2.36             | 0.021956              | 2.91             | 0.185636              | 1.55             |
| HSBP1        | heat shock factor-binding protein 1         | 20 72083626 72084982   | 0.001645              | -1.23            | 0.402723              | 1.12             | 0.455836              | 1.07             |
| TIAL1        | nucleolysin TIAR isoform X2                 | 9 118811476 118832681  | 0.001655              | -1.23            | 0.797559              | 1.04             | 0.515374              | -1.06            |
| MYBL1        | myb-related protein A isoform X4            | 8 67804558 67851069    | 0.001655              | -2.98            | 0.982164              | -1.02            | 0.985102              | 1.01             |
| C5H4orf46    | renal cancer differentiation gene 1 protein | 5 157932859 157935041  | 0.001670              | -1.48            | 0.975456              | 1.01             | 0.281261              | 1.19             |
| FLT4         | vascular endothelial growth factor recepto  | 6 180632816 180677189  | 0.001680              | 1.93             | 0.402511              | 1.42             | 0.175495              | 1.43             |
| SELL         | L-selectin isoform X2                       | 1 27644663 27664868    | 0.001686              | 2.41             | 0.979788              | 1.02             | 0.277229              | 1.48             |
| LOC102139009 |                                             | 0 4289 10189           | 0.001715              | -1.53            | 0.289491              | 1.31             | 0.722259              | 1.07             |
| DCLK1        | serine/threonine-protein kinase DCLK1 is    | 17 15252343 15593963   | 0.001742              | -3.07            | 0.877426              | 1.17             | 0.857193              | 1.10             |
| LOC102124195 |                                             | 5 98629849 98655620    | 0.001777              | 5.82             | 0.384721              | 2.63             | 0.183258              | 2.58             |
| SSTR4        | somatostatin receptor type 4                | 10 39245081 39246247   | 0.001777              | -11.70           | 0.133500              | 5.42             | 0.941476              | 1.08             |
| MSANTD3      | myb/SANT-like DNA-binding domain-co         | 15 37284258 37293231   | 0.001786              | -1.65            | 0.600706              | -1.20            | 0.258984              | -1.26            |
| SLC25A42     | mitochondrial coenzyme A transporter SL     | 19 195722110 19585251  | 0.001801              | 1.81             | 0.970711              | 1.02             | 0.905019              | -1.04            |
| CIITA        | MHC class II transactivator isoform X1      | 20 11139825 11194909   | 0.001811              | 1.67             | 0.805498              | 1.11             | 0.337903              | 1.23             |
| CHI3L2       | chitinase-3-like protein 2 isoform X3       | 1 115509254 115529579  | 0.001830              | 1.99             | 0.293629              | -1.56            | 0.062460              | 1.63             |
| EBAG9        | receptor-binding cancer antigen expressed   | 8 110662939 110688963  | 0.001869              | -1.28            | 0.084996              | 1.26             | 0.222452              | 1.13             |
| LOC102120132 |                                             | 0 6 823                | 0.001877              | 2.07             | 0.965551              | 1.03             | 0.955718              | -1.02            |
| PTGS1        | prostaglandin G/H synthase 1 isoform X2     | 15 14860279 14881861   | 0.001877              | 2.50             | 0.353120              | -1.70            | 0.743246              | 1.15             |
| MUC4         | mucin-4 isoform X1                          | 2 61849 82502          | 0.001877              | 2.46             | 0.966983              | -1.04            | 0.259114              | -1.53            |
| 9-Sep        | #N/A                                        | #N/A                   | 0.001877              | 1.44             | 0.763245              | -1.09            | 0.829031              | 1.04             |
| ZNF274       | neurotrophin receptor-interacting factor h  | 19 58780164 58811696   | 0.001877              | 1.31             | 0.966616              | -1.01            | 0.876483              | 1.02             |
| DTX4         | E3 ubiquitin-protein ligase DTX4            | 14 14789674 14822153   | 0.001880              | -1.66            | 0.030303              | -1.76            | 0.025844              | 1.51             |
| LOC101866362 |                                             | 18 6717 8492           | 0.001888              | -2.17            | 0.209165              | 1.77             | 0.578426              | 1.21             |
| C3H7orf60    | probable methyltransferase BTM2 homolo      | 3 145342685 145476463  | 0.001919              | -1.68            | 0.304505              | 1.39             | 0.530836              | 1.16             |
| SLC30A2      | zinc transporter 2                          | 1 202297771 202304338  | 0.001953              | 4.42             | 0.971540              | -1.07            | 0.479863              | 1.63             |
| LOC102140179 |                                             | 15 83080579 83094963   | 0.001954              | 9.64             | 0.294158              | 3.09             | 0.056501              | -3.34            |
| MINK1        | misshapen-like kinase 1 isoform X1          | 16 4888331 4954940     | 0.001973              | 1.24             | 0.564303              | 1.09             | 0.806601              | -1.03            |
| LOC102125000 |                                             | 14 17381626 17382573   | 0.002001              | -7.00            | 0.775331              | 1.58             | 0.033903              | -4.54            |
| SPTB         | spectrin beta chain, erythrocytic           | 7 129096855 129173405  | 0.002020              | 1.91             | 0.828849              | 1.13             | 0.075324              | 1.56             |
| DNAJB14      | uncharacterized protein LOC101864881        | 5 99170468 99216569    | 0.002031              | -1.95            | 0.169116              | 1.70             | 0.314031              | 1.33             |
| TMEM65       | transmembrane protein 65                    | 8 125672670 125731443  | 0.002039              | -2.11            | 0.011145              | 2.57             | 0.606861              | 1.19             |
| TMC5         | transmembrane channel-like protein 5 iso    | 20 18795014 18863149   | 0.002084              | 5.79             | 0.632020              | 1.86             | 0.564575              | -1.58            |
| AGPAT5       | 1-acyl-sn-glycerol-3-phosphate acyltransf   | 8 6885844 6996145      | 0.002094              | -1.58            | 0.341856              | 1.31             | 0.588963              | 1.12             |
| FAM122B      | protein FAM122B isoform X12                 | X 131690661 131715204  | 0.002113              | -1.56            | 0.851151              | 1.08             | 0.832857              | 1.05             |
| CCDC114      | coiled-coil domain-containing protein 114   | 19 49108948 49134287   | 0.002152              | 3.43             | 0.992155              | 1.01             | 0.281960              | -1.78            |
| C8H8orf37    | protein C8orf37 homolog isoform X3          | 8 96385752 96412524    | 0.002152              | -1.46            | 0.463875              | 1.20             | 0.252926              | 1.20             |
| PI16         | peptidase inhibitor 16 isoform X2           | 4 133771080 133780313  | 0.002158              | 1.84             | 0.523602              | 1.31             | 0.026527              | 1.68             |
| DUSP28       | dual specificity phosphatase 28             | 12 130431229 130432626 | 0.002158              | -1.39            | 0.475707              | 1.17             | 0.453589              | -1.12            |
| B3GNT8       | UDP-GlcNAc:betaGal beta-1,3-N-acetylgl      | 19 42001971 42003164   | 0.002158              | -1.67            | 0.437594              | -1.30            | 0.999302              | 1.00             |
| PPP2R2B      | serine/threonine-protein phosphatase 2A 5   | 6 145861901 146353203  | 0.002158              | -1.95            | 0.543152              | -1.31            | 0.639907              | -1.15            |
| NEK10        | serine/threonine-protein kinase Nek10 iso   | 2 20134506 20387281    | 0.002163              | 3.73             | 0.715069              | -1.47            | 0.217201              | -1.98            |
| TBL1XR1      | F-box-like/WD repeat-containing protein     | 2 81446923 81486782    | 0.002163              | -2.01            | 0.284079              | 1.58             | 0.389197              | 1.29             |
| NUMBL        | numb-like protein isoform X1                | 19 41180154 41205166   | 0.002170              | 1.82             | 0.130360              | 1.67             | 0.544715              | -1.17            |
| BAHD1        | bromo adjacent homology domain-contain      | 7 17255563 17282374    | 0.002170              | 1.23             | 0.539336              | -1.09            | 0.336347              | -1.09            |
| LRRN2        | leucine-rich repeat neuronal protein 2      | 1 63110026 63112167    | 0.002170              | -1.50            | 0.966785              | 1.02             | 0.000157              | -1.61            |
| GLT6D1       | glycosyltransferase 6 domain-containing p   | 6 121407105 121412579  | 0.002179              | 2.34             | 0.840825              | 1.16             | 0.250701              | -1.50            |
| SMG6         | telomerase-binding protein EST1A isoform    | 16 1966009 2213963     | 0.002183              | 1.27             | 0.757402              | -1.06            | 0.826296              | -1.03            |
| ATP2C2       | calcium-transporting ATPase type 2C mem     | 20 72660246 72750626   | 0.002183              | 1.94             | 0.899488              | 1.08             | 0.545283              | -1.20            |
| KANK4        | KN motif and ankyrin repeat domain-cont     | 1 165114014 165161226  | 0.002206              | 2.10             | 0.236399              | 1.71             | 0.789334              | 1.10             |
| MRPL1        | 39S ribosomal protein L1, mitochondrial     | 5 56528043 56617930    | 0.002206              | -1.39            | 0.295806              | 1.24             | 0.977740              | -1.01            |
| ATP2A3       | sarcoplasmic/endoplasmic reticulum calci    | 16 3864288 3901156     | 0.002214              | 1.54             | 0.876217              | -1.06            | 0.667218              | 1.09             |
| FOXK1        | forkhead box protein K1                     | 3 39718373 39800599    | 0.002214              | 1.35             | 0.290713              | -1.22            | 0.139423              | 1.20             |
| MCM8         | DNA helicase MCM8 isoform X2                | 10 56500074 56542619   | 0.002217              | -1.47            | 0.003033              | 1.76             | 0.922607              | 1.02             |
| PPP1R17      | uncharacterized protein LOC101926466        | 3 88962547 88977420    | 0.002219              | 21.43            | 0.664571              | -2.61            | 0.014508              | -14.27           |
| TES          | testin isoform X1                           | 3 148736548 148785331  | 0.002219              | -1.55            | 0.492393              | 1.22             | 0.491021              | 1.14             |
| CCDC89       | coiled-coil domain-containing protein 89    | 14 81255977 81257101   | 0.002226              | -1.78            | 0.403887              | 1.36             | 0.642795              | 1.13             |
| ANKRD45      | ankyrin repeat domain-containing protein    | 1 31547298 31596288    | 0.002239              | 7.46             | 0.567026              | -2.22            | 0.005203              | -9.36            |
| LOC107128465 |                                             | X 41789561 41792024    | 0.002260              | 2.26             | 0.030722              | 2.89             | 0.000000              | 4.86             |
| MRPS35       | uncharacterized protein LOC101866664        | 11 28402173 28443197   | 0.002260              | -1.26            | 0.323906              | 1.16             | 0.563394              | -1.06            |
| LOC101925688 |                                             | 6 1282571 1328909      | 0.002260              | 1.34             | 0.466527              | -1.15            | 0.975276              | -1.00            |
| AKAP13       | A-kinase anchor protein 13 isoform X1       | 7 65669082 65919149    | 0.002260              | 1.30             | 0.635746              | 1.09             | 0.789116              | -1.04            |
| IL10         | interleukin-10                              | 1 65340900 65344795    | 0.002260              | -3.26            | 0.517436              | -1.68            | 0.454482              | -1.47            |
| LOC102145854 |                                             | 2 27657894 27717381    | 0.002261              | 2.32             | 0.865298              | 1.15             | 0.044938              | -1.89            |
| TNRC18       | trinucleotide repeat-containing gene 18 pr  | 3 40690574 40812596    | 0.002261              | 1.39             | 0.675913              | -1.11            | 0.361225              | 1.14             |
| BLCAP        | bladder cancer-associated protein           | 10 69092959 69093222   | 0.002261              | -1.16            | 0.556607              | 1.06             | 0.043569              | -1.12            |
| SIX2         | homeobox protein SIX2                       | 13 65374600 65377546   | 0.002314              | 5.27             | 0.626802              | 2.03             | 0.967163              | -1.04            |
| PTPRO        | receptor-type tyrosine-protein phosphatase  | 11 15972403 16245203   | 0.002314              | 3.51             | 0.076022              | 3.39             | 0.360661              | 1.65             |
| CCR4         | C-C chemokine receptor type 4               | 2 14423869 14424951    | 0.002314              | 2.39             | 0.194808              | -2.00            | 0.014380              | 2.07             |
| C15H9orf40   | uncharacterized protein LOC101867488        | 15 85744394 85751481   | 0.002314              | -1.83            | 0.682763              | 1.20             | 0.587756              | 1.16             |
| ANO7         | anoctamin-7 isoform X1                      | 12 131139903 131182207 | 0.002328              | 2.35             | 0.987462              | 1.01             | 0.560222              | -1.26            |
| CHMP5        | charged multivesicular body protein 5       | 15 45592419 45609010   | 0.002328              | -1.40            | 0.094035              | 1.37             | 0.527555              | 1.10             |
| TMEM168      | transmembrane protein 168 isoform X1        | 3 145290654 145309991  | 0.002335              | -1.51            | 0.107575              | 1.46             | 0.230337              | 1.23             |
| PRPF39       | pre-mRNA-processing factor 39 isoform 1     | 7 109351167 109371424  | 0.002335              | -1.66            | 0.549012              | 1.23             | 0.876082              | -1.04            |
| MX1          | myxovirus (influenza virus) resistance 1, i | 3 5298759 5327477      | 0.002345              | -2.81            | 0.227021              | 2.13             | 0.790881              | 1.14             |
| CABIN1       | calcineurin-binding protein cabin-1 isoform | 0 482375 628217        | 0.002372              | 1.28             | 0.370723              | -1.15            | 0.923819              | 1.01             |
| IF144L       | interferon-induced protein 44-like          | 1 148599623 148613581  | 0.002377              | -2.18            | 0.012385              | 2.70             | 0.813728              | 1.10             |
| DPF2         | zinc finger protein ubi-d4 isoform X2       | 14 9178817 9196155     | 0.002382              | 1.20             | 0.158886              | -1.16            | 0.857637              | -1.02            |
| MCU          | calcium uniporter protein, mitochondrial i  | 9 62669341 62877369    | 0.002382              | -1.30            | 0.964150              | 1.01             | 0.400290              | -1.10            |
| ZBED2        | zinc finger BED domain-containing protei    | 2 160602211 160602867  | 0.002388              | 3.05             | 0.841810              | 1.22             | 0.971565              | 1.02             |
| C3H7orf73    | uncharacterized protein C7orf73 homolog     | 3 168639462 168651441  | 0.002393              | -1.41            | 0.753407              | 1.09             | 0.786694              | -1.05            |

| Gene symbol  | Gene name                                                                              | chr_start_end          | Day3 adjusted P-value | Day3 fold change | Day5 adjusted P-value | Day5 fold change | Day7 adjusted P-value | Day7 fold change |
|--------------|----------------------------------------------------------------------------------------|------------------------|-----------------------|------------------|-----------------------|------------------|-----------------------|------------------|
| LOC102121104 | aldo-keto reductase family 1 member B10                                                | 3 167415544 167426331  | 0.002397              | -1.77            | 0.003932              | -2.24            | 0.968019              | -1.01            |
| FASTKD1      | FAST kinase domain-containing protein 1                                                | 12 58379970 58429779   | 0.002399              | -1.33            | 0.444623              | 1.15             | 0.933345              | 1.01             |
| DLL4         | delta-like protein 4                                                                   | 7 17816285 17824736    | 0.002406              | 1.75             | 0.264616              | 1.47             | 0.618629              | 1.14             |
| RAPGEF2      | rap guanine nucleotide exchange factor 2                                               | 5 158364936 158625424  | 0.002407              | 1.35             | 0.566217              | 1.13             | 0.272346              | 1.15             |
| SLC25A20     | mitochondrial carnitine/acylcarnitine carrier 20                                       | 2 104001618 104044802  | 0.002414              | -1.36            | 0.688606              | -1.10            | 0.107014              | 1.22             |
| CFAP45       | cilia- and flagella-associated protein 45 isoform 1                                    | 1 91773928 91802094    | 0.002465              | 2.15             | 0.407774              | 1.54             | 0.412322              | -1.32            |
| IL17RD       | interleukin-17 receptor D isoform X2                                                   | 2 112419159 112488777  | 0.002501              | 2.09             | 0.760496              | 1.19             | 0.492448              | 1.24             |
| C18H1orf21   | UPF0711 protein C18orf21 homolog isoform 1                                             | 18 46020880 46027228   | 0.002507              | -1.31            | 0.929092              | -1.02            | 0.336193              | 1.12             |
| GRMC2        | membrane-associated progesterone receptor 2                                            | 5 127262850 127279893  | 0.002525              | -1.40            | 0.170938              | 1.31             | 0.812042              | 1.04             |
| LOC102129056 | dol-P-Glc:Glc(2)Man(9)GlcNAc(2)-PP-D                                                   | 11 34741923 34746241   | 0.002525              | -1.78            | 0.298708              | 1.45             | 0.845882              | 1.06             |
| OBSL1        | obscurin-like protein 1 isoform X2                                                     | 12 109236618 109257388 | 0.002549              | 1.62             | 0.600718              | 1.20             | 0.286232              | -1.24            |
| PANK2        | pancreatic acyl-CoA oxidase 2                                                          | 10 58552442 58592339   | 0.002559              | -1.22            | 0.745066              | 1.05             | 0.425449              | -1.07            |
| SERPINE2     | glia-derived nexin                                                                     | 12 113751755 113778296 | 0.002581              | 1.41             | 0.205168              | -1.30            | 0.812259              | 1.04             |
| LOC102115343 | zinc finger protein 316-like                                                           | 19 50944873 50963148   | 0.002594              | 3.13             | 0.775043              | -1.33            | 0.697442              | 1.25             |
| RAB20        | ras-related protein Rab-20                                                             | 17 92930053 92966308   | 0.002594              | -1.68            | 0.866137              | 1.08             | 0.467697              | -1.18            |
| C10H20orf194 | uncharacterized protein C20orf194 homolog 1                                            | 10 59092077 59254584   | 0.002619              | 1.64             | 0.758523              | 1.13             | 0.367898              | -1.22            |
| HCN4         | potassium/sodium hyperpolarization-activated cyclic nucleotide-gated channel subunit 4 | 7 51220499 51267730    | 0.002628              | 5.69             | 0.139927              | -3.79            | 0.669786              | -1.35            |
| MTN3         | LOW QUALITY PROTEIN: matrilin-3                                                        | 13 91004919 91025789   | 0.002628              | -2.28            | 0.000001              | 6.09             | 0.881747              | -1.07            |
| CCDC14       | coiled-coil domain-containing protein 14                                               | 2 148171179 148243861  | 0.002637              | -1.61            | 0.979469              | 1.01             | 0.573876              | 1.13             |
| ZC3H7B       | zinc finger CCCH domain-containing protein 7B                                          | 10 9755791 9803683     | 0.002654              | 1.47             | 0.973196              | 1.01             | 0.878823              | 1.03             |
| LRG1         | leucine-rich alpha-2-glycoprotein isoform 1                                            | 19 4610892 4612963     | 0.002655              | 3.32             | 0.929363              | -1.11            | 0.775471              | -1.18            |
| LOC107129348 |                                                                                        | 3 183700074 183701810  | 0.002665              | 4.15             | 0.319906              | 2.83             | 0.761417              | 1.25             |
| LOC102117156 |                                                                                        | 5 59580813 59636845    | 0.002671              | -2.42            | 0.656988              | 1.34             | 0.239196              | -1.54            |
| RASGRP2      | RAS guanyl-releasing protein 2 isoform X1                                              | 14 9817238 9836650     | 0.002683              | 1.65             | 0.579348              | 1.22             | 0.684026              | -1.10            |
| IPCEF1       | interactor protein for cytohesin exchange factor 1                                     | 4 60498262 60605083    | 0.002695              | 1.43             | 0.464569              | 1.19             | 0.717485              | 1.07             |
| ZMYND12      | zinc finger MYND domain-containing protein 12                                          | 1 185230240 185253829  | 0.002740              | -1.81            | 0.944153              | -1.04            | 0.553793              | 1.18             |
| MUC2         | mucin-2                                                                                | 14 909936 945593       | 0.002755              | 25.58            | 1.000000              | 3.40             | 0.618486              | -2.33            |
| MARCO        | macrophage receptor MARCO                                                              | 12 13198682 13258158   | 0.002755              | -3.04            | 0.778436              | -1.29            | 0.571853              | -1.33            |
| BNIP3        | LOW QUALITY PROTEIN: BCL2/adrenomedullary protein 3                                    | 9 131429140 131443438  | 0.002798              | -1.76            | 0.755853              | 1.15             | 0.665377              | 1.12             |
| ARL15        | ADP-ribosylation factor-like protein 15 isoform 1                                      | 6 53315093 53758878    | 0.002808              | -1.65            | 0.069115              | 1.66             | 0.797398              | 1.07             |
| STOX1        | storkhead-box protein 1                                                                | 9 66907493 66917429    | 0.002811              | 2.21             | 0.579401              | -1.35            | 0.957256              | -1.03            |
| FAR1         | fatty acyl-CoA reductase 1 isoform X2                                                  | 14 53979505 54014713   | 0.002811              | -1.68            | 0.149512              | 1.56             | 0.511382              | 1.17             |
| ADAMTSL1     | ADAMTS-like protein 1 isoform X1                                                       | 15 59870489 60818057   | 0.002811              | -2.53            | 0.462267              | 1.59             | 0.341788              | -1.47            |
| LOC102143228 | small integral membrane protein 20                                                     | 19 22593138 22593341   | 0.002817              | -160.22          | 1.000000              | 1.00             | 0.021785              | 80.19            |
| RCOR2        | REST corepressor 2 isoform X2                                                          | 14 10660102 10664830   | 0.002825              | 2.27             | 0.948497              | -1.05            | 0.200447              | 1.52             |
| FAT4         | protocadherin Fat 4 isoform X1                                                         | 5 124263495 124448811  | 0.002837              | 1.46             | 0.439460              | 1.21             | 0.004958              | 1.46             |
| SPTSSA       | serine palmitoyltransferase small subunit 1                                            | 7 98356050 98392595    | 0.002837              | -1.51            | 0.002930              | 1.83             | 0.962857              | 1.01             |
| IGSF3        | immunoglobulin superfamily member 3 isoform 1                                          | 1 110097267 110186788  | 0.002855              | 1.70             | 0.972166              | -1.02            | 0.789492              | 1.07             |
| CYSLTR2      | cysteinyl leukotriene receptor 2 isoform X1                                            | 17 27865944 27875506   | 0.002899              | 2.12             | 0.614014              | 1.31             | 0.424924              | 1.29             |
| PCYT1B       | choline-phosphate cytidylyltransferase B isoform 1                                     | X 22556071 22460922    | 0.002899              | 1.76             | 0.879961              | -1.08            | 0.039178              | 1.54             |
| ATP1B3       | uncharacterized protein LOC101865296                                                   | 2 44010210 44057680    | 0.002910              | -1.25            | 0.792175              | -1.05            | 0.025622              | -1.21            |
| TMEM132E     | transmembrane protein 132E                                                             | 16 30982781 30994904   | 0.002927              | 3.13             | 0.000543              | 9.20             | 0.827184              | -1.14            |
| C6H5orf30    | UNC119-binding protein C5orf30 homolog 1                                               | 6 101822798 101823418  | 0.002935              | -1.48            | 0.279324              | 1.30             | 0.455039              | 1.14             |
| RGS22        | regulator of G-protein signaling 22 isoform 1                                          | 8 101094257 101246382  | 0.002950              | 3.49             | 0.871598              | 1.21             | 0.935343              | -1.06            |
| LOC102133044 | HLA class II histocompatibility antigen, DRB1 gene                                     | 4 48970 49866          | 0.002957              | 1.82             | 0.007380              | -2.23            | 0.105545              | 1.46             |
| C16H17orf97  | protein LAT1 isoform X1                                                                | 16 283485 287962       | 0.003054              | 4.35             | 0.678835              | 1.64             | 0.313085              | -1.97            |
| ETNK1        | ethanolamine kinase 1                                                                  | 11 23314362 23349536   | 0.003094              | -1.92            | 0.149587              | 1.75             | 0.782650              | 1.09             |
| MAPRE3       | uncharacterized protein LOC101925557                                                   | 13 83850189 83854309   | 0.003106              | 1.63             | 0.811346              | 1.11             | 0.330093              | -1.23            |
| FTO          | alpha-ketoglutarate-dependent dioxygenase FTO                                          | 20 41564473 41985035   | 0.003113              | 1.29             | 0.993669              | 1.00             | 0.668883              | 1.05             |
| GRIK4        | glutamate receptor ionotropic, kainate 4 isoform 1                                     | 14 116729515 117059134 | 0.003166              | 2.66             | 0.318257              | 1.97             | 0.789512              | -1.15            |
| LOC102120083 | galectin-10                                                                            | 19 40145738 40150964   | 0.003167              | 9.96             | 0.133714              | 7.14             | 0.482639              | -1.90            |
| CFAP206      | UPF0704 protein C6orf165 homolog isoform 1                                             | 4 86451777 86512858    | 0.003172              | 2.73             | 0.491465              | -1.72            | 0.984587              | -1.01            |
| TMEM213      | transmembrane protein 213                                                              | 3 171778198 171783404  | 0.003172              | 2.06             | 0.699569              | 1.24             | 0.366641              | 1.33             |
| ENTPD6       | ectonucleoside triphosphate diphosphohydrolase 6                                       | 10 37118782 37148588   | 0.003175              | -1.29            | 0.314695              | -1.18            | 0.297888              | -1.12            |
| ABCG4        | ATP-binding cassette sub-family G member 4                                             | 14 115187396 115198329 | 0.003181              | 2.11             | 0.710923              | 1.25             | 0.556112              | -1.23            |
| CCDC88C      | protein Daple isoform X1                                                               | 7 156237400 156392753  | 0.003181              | 1.26             | 0.000000              | -1.69            | 0.110738              | 1.16             |
| LOC102137002 |                                                                                        | 14 9080090 9090513     | 0.003183              | -2.03            | 0.859681              | 1.12             | 0.393017              | -1.31            |
| SKI          | ski oncogene                                                                           | 1 226079464 226161511  | 0.003218              | 1.51             | 0.684858              | 1.14             | 0.402860              | 1.17             |
| TARS2        | threonine-tRNA ligase, mitochondrial isoform 1                                         | 1 101565880 101586995  | 0.003218              | 1.26             | 0.959668              | -1.01            | 0.425437              | 1.09             |
| BMI1         | polycomb complex protein BMI-1                                                         | 9 22841049 22844147    | 0.003218              | -1.46            | 0.027383              | 1.57             | 0.171586              | 1.24             |
| LOC102135631 | serpin B3                                                                              | 18 16671100 16676332   | 0.003221              | 5.40             | 0.494657              | -2.27            | 0.222323              | 2.48             |
| LAMTOR3      | regulator complex protein LAMTOR3 isoform 1                                            | 5 99151237 99163421    | 0.003293              | -1.39            | 0.530211              | 1.16             | 0.695793              | -1.06            |
| FAM135A      | protein FAM135A isoform X12                                                            | 4 103330772 103447365  | 0.003293              | -1.64            | 0.239996              | 1.44             | 0.918273              | -1.03            |
| DSN1         | kinetochore-associated protein DSN1 homolog 1                                          | 10 68330059 68348544   | 0.003297              | -1.25            | 0.958950              | 1.01             | 0.909040              | 1.01             |
| SPEF1        | sperm flagellar protein 1 isoform X1                                                   | 10 58710244 58714198   | 0.003327              | 3.57             | 0.882728              | -1.21            | 0.205036              | -2.12            |
| PQLC3        | PQ-loop repeat-containing protein 3 isoform 1                                          | 13 99801476 99824030   | 0.003372              | 1.23             | 0.553687              | 1.10             | 0.141707              | 1.14             |
| MGAM         | maltase-glucoamylase, intestinal isoform 1                                             | 3 175007490 175141629  | 0.003380              | 2.44             | 0.549363              | 1.48             | 0.400981              | 1.41             |
| GOLGB1       | golgin subfamily B member 1 isoform X1                                                 | 2 150477542 150550468  | 0.003415              | 1.28             | 0.781725              | -1.06            | 0.747297              | -1.04            |
| CLTCL1       | clathrin heavy chain 2 isoform X1                                                      | 10 32186674 32302662   | 0.003415              | -2.38            | 0.458909              | 1.56             | 0.921410              | 1.05             |
| LRR1M3       | leucine-rich repeat transmembrane neuron class 1 member 3                              | 9 68917470 69086492    | 0.003460              | 7.43             | 0.327647              | -3.07            | 0.211773              | -2.54            |
| LOC102131399 |                                                                                        | 0 4332 12057           | 0.003485              | 4.54             | 0.852596              | -1.29            | 0.619227              | -1.41            |
| ADGRE2       | adhesion G protein-coupled receptor E2 isoform 1                                       | 19 15155178 15175002   | 0.003501              | -1.77            | 0.459293              | -1.34            | 0.817276              | -1.07            |
| CPSF6        | cleavage and polyadenylation specificity factor 6                                      | 11 68283396 68307051   | 0.003540              | -1.54            | 0.549650              | 1.20             | 0.337687              | 1.20             |
| AKAP6        | A-kinase anchor protein 6 isoform X1                                                   | 7 96347350 96756778    | 0.003544              | 1.76             | 0.471673              | 1.32             | 0.481998              | -1.20            |
| C19H19orf35  | putative uncharacterized protein C19orf35                                              | 19 2146914 2152163     | 0.003544              | 1.75             | 0.361521              | 1.50             | 0.561590              | 1.19             |
| RAB2A        | ras-related protein Rab-2A                                                             | 8 61631380 61733174    | 0.003544              | -1.54            | 0.121122              | 1.48             | 0.583247              | 1.12             |
| PCGF6        | polycomb group RING finger protein 6 isoform 1                                         | 9 102360623 102402156  | 0.003544              | -1.65            | 0.546092              | 1.25             | 0.626278              | 1.12             |
| ACYP2        | acylphosphatase 2, muscle type                                                         | 13 55763584 55959465   | 0.003557              | -1.69            | 0.512719              | 1.26             | 0.157504              | -1.37            |
| LOC102119346 | cocaine esterase-like                                                                  | 20 55075763 55087076   | 0.003628              | 1.96             | 0.471956              | 1.40             | 0.037333              | -1.73            |
| MYO7B        | unconventional myosin-VIIb                                                             | 12 3988342 4074536     | 0.003630              | 1.65             | 0.918326              | 1.06             | 0.798034              | 1.07             |
| DPT          | dermatopontin                                                                          | 1 26669826 26703324    | 0.003637              | 2.16             | 0.861716              | 1.13             | 0.819121              | 1.09             |
| ERVFRD-1     | syncytin-2 precursor                                                                   | 4 159747084 159748697  | 0.003640              | 4.66             | 0.000562              | 13.90            | 0.253916              | -2.13            |
| BBIP1        | BBSome-interacting protein 1 isoform X1                                                | 9 110100092 110118289  | 0.003647              | -1.27            | 0.765297              | 1.07             | 0.403142              | 1.10             |
| C5H4orf27    | UPF0609 protein C4orf27 homolog isoform 1                                              | 5 168939570 168969943  | 0.003654              | -1.34            | 0.966374              | -1.01            | 0.024321              | 1.29             |
| LOC102140364 | uncharacterized protein LOC102140364                                                   | 3 145653915 145655469  | 0.003654              | -1.41            | 0.585586              | 1.15             | 0.751394              | 1.06             |
| LOC101925240 | uncharacterized protein LOC101925240                                                   | 4 139035867 139049762  | 0.003670              | 2.90             | 0.686655              | 1.27             | 0.552928              | -1.35            |
| MTA3         | metastasis-associated protein MTA3 isoform 1                                           | 13 67681585 67866244   | 0.003670              | 1.26             | 0.999575              | 1.00             | 0.353176              | -1.10            |



| Gene symbol  | Gene name                                    | chr_start_end          | Day3 adjusted P-value | Day3 fold change | Day5 adjusted P-value | Day5 fold change | Day7 adjusted P-value | Day7 fold change |
|--------------|----------------------------------------------|------------------------|-----------------------|------------------|-----------------------|------------------|-----------------------|------------------|
| LOC102139733 | signal-regulatory protein beta-1 isoform 3   | 10 60968239 60985629   | 0.003674              | 2.01             | 0.176558              | 1.81             | 0.106225              | 1.60             |
| MEMO1        | protein MEMO1                                | 13 78721278 78864457   | 0.003674              | -1.41            | 0.887889              | -1.05            | 0.901911              | 1.02             |
| RMDN1        | regulator of microtubule dynamics protein    | 8 87533421 87567281    | 0.003680              | -1.27            | 0.803911              | 1.05             | 0.370282              | -1.10            |
| CXCR2        | C-X-C chemokine receptor type 2              | 12 107777290 107778357 | 0.003698              | 3.53             | 0.755976              | 1.39             | 0.172096              | 2.11             |
| RTN1         | reticulon-1 isoform X1                       | 7 123875248 124155651  | 0.003704              | 1.46             | 0.135011              | -1.41            | 0.308763              | -1.19            |
| SOX17        | uncharacterized protein LOC101925698         | 8 55495531 55497376    | 0.003704              | -1.55            | 0.349160              | 1.32             | 0.821117              | 1.06             |
| MED7         | mediator of RNA polymerase II transcript     | 6 156528289 156528987  | 0.003739              | -1.33            | 0.613078              | 1.11             | 0.466553              | 1.10             |
| LOC107129826 |                                              | 5 138691310 138734498  | 0.003748              | -1.36            | 0.059572              | 1.39             | 0.118412              | -1.22            |
| ZRANB2       | zinc finger Ran-binding domain-containing    | 1 156256086 156271798  | 0.003748              | -1.85            | 0.229623              | 1.59             | 0.446273              | 1.24             |
| S100A12      | LOW QUALITY PROTEIN: protein S100            | 1 98496632 98497396    | 0.003759              | 3.80             | 0.571444              | 1.83             | 0.640196              | -1.40            |
| COLEC12      | collectin-12                                 | 18 61553001 61751192   | 0.003773              | 1.94             | 0.164228              | 1.75             | 0.513315              | 1.22             |
| TMEM161B     | transmembrane protein 161B isoform X1        | 6 86612942 86685180    | 0.003787              | -1.59            | 0.392503              | 1.30             | 0.356582              | 1.21             |
| MLF1         | myeloid leukemia factor 1 isoform X1         | 2 60924266 60960849    | 0.003843              | 2.34             | 0.915438              | -1.10            | 0.067237              | -1.88            |
| LBH          | protein LBH                                  | 13 80509843 80535999   | 0.003852              | 1.66             | 0.985772              | 1.01             | 0.187678              | 1.33             |
| UBE2G2       | ubiquitin-conjugating enzyme E2 G2           | 3 1937870 1969201      | 0.003852              | -1.19            | 0.446413              | 1.09             | 0.195229              | -1.10            |
| CDKL4        | cyclin-dependent kinase-like 4               | 13 71392764 71449605   | 0.003852              | -2.27            | 0.049494              | 2.49             | 0.873043              | 1.07             |
| MS4A2        | high affinity immunoglobulin epsilon rece    | 14 14084643 14091832   | 0.003860              | 5.42             | 0.687321              | 1.65             | 0.268199              | 2.15             |
| IFT140       | intraflagellar transport protein 140 homol   | 20 1555861 1661618     | 0.003868              | 1.49             | 0.174494              | -1.39            | 0.285841              | -1.20            |
| SACM1L       | phosphatidylinositol phosphatase SAC1        | 2 100696174 100751360  | 0.003868              | -1.42            | 0.843086              | 1.07             | 0.479413              | 1.12             |
| MAP4         | microtubule-associated protein 4 isoform     | 2 102924510 103081794  | 0.003899              | 1.30             | 0.553687              | 1.12             | 0.969366              | 1.01             |
| GPR180       | integral membrane protein GPR180             | 17 77222656 77250050   | 0.003902              | -1.90            | 0.217948              | 1.64             | 0.476052              | 1.23             |
| LOC107130505 |                                              | 1 213112993 213115631  | 0.003902              | -3.83            | 0.321766              | 3.53             | 0.622541              | 1.44             |
| LAMTOR5      | ragulator complex protein LAMTOR5            | 1 116325333 116331723  | 0.003914              | -1.38            | 0.987471              | 1.01             | 0.278678              | -1.17            |
| DNAJB13      | dnaJ homolog subfamily B member 13 iso       | 0 1162 20540           | 0.003918              | 4.10             | 0.451287              | -2.32            | 0.072824              | -3.02            |
| NTN1         | netrin-1                                     | 16 9152704 9383639     | 0.003918              | 2.28             | 0.347002              | 1.67             | 0.378479              | -1.38            |
| EHD3         | EH domain-containing protein 3               | 13 79476197 79506963   | 0.003926              | 2.02             | 0.538819              | 1.37             | 0.073431              | 1.67             |
| GUF1         | translation factor GUF1, mitochondrial iso   | 5 44555495 44575569    | 0.003929              | -1.52            | 0.544138              | 1.20             | 0.731580              | 1.07             |
| UNC119B      | protein unc-119 homolog B                    | 11 124659793 124668739 | 0.003937              | 1.29             | 0.256924              | -1.20            | 0.474031              | 1.09             |
| DMRTC2       | doublesex- and mab-3-related transcriptio    | 19 42343466 42348111   | 0.003939              | 25.46            | 1.000000              | -44.19           | 0.034150              | -15.79           |
| SYT2         | synaptotagmin-2                              | 1 60975790 60984780    | 0.004003              | 2.94             | 0.972212              | 1.05             | 0.207826              | -1.70            |
| GGH          | gamma-glutamyl hydrolase                     | 8 64127827 64151726    | 0.004034              | -1.55            | 0.827275              | 1.09             | 0.679551              | 1.09             |
| LOC102141318 |                                              | 0 59446 61706          | 0.004052              | -1.67            | 0.442823              | 1.31             | 0.439610              | 1.20             |
| ALDOC        | fructose-bisphosphate aldolase C isoform     | 16 24807041 24810571   | 0.004059              | -2.38            | 0.895774              | 1.12             | 0.268000              | 1.53             |
| LRRC55       | leucine-rich repeat-containing protein 55    | 14 16434378 16440136   | 0.004074              | 5.63             | 0.672273              | -1.72            | 0.750717              | 1.29             |
| DLEC1        | deleted in lung and esophageal cancer pro    | 2 92916809 92983153    | 0.004093              | 3.42             | 0.449409              | 1.91             | 0.126424              | -2.22            |
| KATNBL1      | KATNB1-like protein 1                        | 7 10802954 10824972    | 0.004121              | -1.77            | 0.599431              | 1.25             | 0.929519              | 1.03             |
| CPLX2        | uncharacterized protein LOC101865695         | 6 175589555 175590837  | 0.004126              | 20.46            | 0.360854              | -5.89            | 0.316854              | -4.33            |
| COL19A1      | collagen alpha-1(XI) chain isoform X1        | 4 103665336 103991131  | 0.004126              | 6.76             | 0.404300              | 2.81             | 0.085517              | -4.09            |
| LOC107131032 |                                              | 10 28789642 28790491   | 0.004126              | 3.01             | 0.257870              | 2.23             | 0.745153              | -1.19            |
| BPNT1        | 3(2'),5'-bisphosphate nucleotidase 1 isofo   | 1 78779270 78804452    | 0.004126              | -1.27            | 0.213076              | -1.20            | 0.325288              | 1.11             |
| MAL2         | protein MAL2 isoform X2                      | 8 120467947 120500927  | 0.004140              | -1.61            | 0.994670              | 1.00             | 0.708461              | 1.09             |
| TRAF3IP1     | TRAF3-interacting protein 1 isoform X5       | 12 128155191 128250594 | 0.004142              | 1.55             | 0.697444              | -1.15            | 0.641584              | -1.11            |
| LRRC6        | protein tllB homolog isoform X2              | 8 133953375 134047176  | 0.004144              | 2.30             | 0.272250              | -1.80            | 0.796250              | -1.11            |
| FGGY         | FGGY carbohydrate kinase domain-conta        | 1 167624359 168046100  | 0.004144              | -1.34            | 0.065526              | -1.35            | 0.016575              | -1.30            |
| TP63         | tumor protein 63 isoform X3                  | 2 7573970 7836164      | 0.004146              | 4.30             | 0.912228              | 1.19             | 0.906068              | 1.10             |
| CPM          | carboxypeptidase M                           | 11 67901097 67973987   | 0.004146              | -2.05            | 0.816784              | -1.16            | 0.224665              | -1.47            |
| PRR12        | proline-rich protein 12                      | 19 50437046 50469410   | 0.004150              | 1.43             | 0.566219              | -1.16            | 0.143389              | 1.25             |
| FRG1         | protein FRG1                                 | 5 189339486 189361943  | 0.004150              | -1.17            | 0.051463              | -1.20            | 0.034338              | -1.14            |
| P2RY2        | P2Y purinoceptor 2                           | 14 68458930 68460063   | 0.004150              | -1.59            | 0.865298              | -1.08            | 0.053072              | -1.44            |
| MTHFS        | 5-formyltetrahydrofolate cyclo-ligase isof   | 7 58305419 58356275    | 0.004161              | -1.41            | 0.023392              | -1.54            | 0.003102              | -1.45            |
| C1D          | C1D nuclear receptor corepressor             | 13 41908968 41913175   | 0.004161              | -1.49            | 0.141074              | 1.43             | 0.458356              | 1.15             |
| LOC102119686 |                                              | 9 56028450 56029144    | 0.004161              | -1.97            | 0.000000              | 50.76            | 0.596375              | -1.19            |
| DMKN         | dermokine isoform X4                         | 19 35947286 35962651   | 0.004161              | -3.03            | 0.793556              | 1.28             | 0.379567              | -1.56            |
| ZNF266       | zinc finger protein 266                      | 19 9708606 9715360     | 0.004163              | 1.34             | 0.395208              | 1.19             | 0.984304              | -1.00            |
| CDH10        | cadherin-10                                  | 6 24910225 25022650    | 0.004163              | -2.20            | 0.389142              | 1.57             | 0.029258              | 1.96             |
| YAF2         | uncharacterized protein LOC101865921         | 11 40696824 40776217   | 0.004225              | -1.63            | 0.365976              | 1.35             | 0.674176              | 1.11             |
| RUNDC3A      | RUN domain-containing protein 3A isofo       | 16 56102042 56107818   | 0.004236              | 3.76             | 0.526715              | -2.13            | 0.583275              | -1.38            |
| RHPN2        | rhopilin-2                                   | 19 33336931 33416038   | 0.004264              | 1.87             | 0.656406              | -1.24            | 0.633388              | 1.16             |
| KIAA1715     | protein lunapark isoform X3                  | 12 64882899 64960648   | 0.004264              | -1.63            | 0.617896              | 1.20             | 0.212916              | 1.31             |
| DNAH1        | dynein heavy chain 1, axonemal isoform 2     | 2 107595440 107671781  | 0.004283              | 3.14             | 0.990354              | -1.02            | 0.179750              | -1.99            |
| LRCH2        | leucine-rich repeat and calponin homolog     | X 112030120 112157048  | 0.004283              | -1.61            | 0.679647              | -1.16            | 0.327567              | 1.23             |
| COMMD10      | COMM domain-containing protein 10 iso        | 6 114978101 115235884  | 0.004288              | -1.76            | 0.632848              | 1.23             | 0.433101              | 1.23             |
| LOC107127815 |                                              | 16 41976548 41988764   | 0.004303              | 6.14             | 0.326266              | -3.99            | 0.460308              | -1.83            |
| LOC102120260 |                                              | 1 250856 257221        | 0.004331              | 3.50             | 0.022085              | 4.98             | 0.810973              | 1.17             |
| DAPK1        | death-associated protein kinase 1 isoform    | 15 98162288 98371567   | 0.004333              | 1.41             | 0.092590              | -1.41            | 0.211855              | -1.21            |
| LOC107127955 |                                              | 17 29258380 29264635   | 0.004369              | -2.71            | 0.203926              | 2.23             | 0.982723              | -1.01            |
| LOC102143239 |                                              | 11 6862291 6869296     | 0.004379              | -1.79            | 0.351612              | 1.44             | 0.187858              | 1.40             |
| SSC5D        | soluble scavenger receptor cysteine-rich d   | 19 56334623 56359683   | 0.004442              | 1.55             | 0.472790              | -1.24            | 0.137972              | 1.31             |
| FAM65B       | protein FAM65B isoform X4                    | 4 145520965 145763560  | 0.004449              | 1.72             | 0.733772              | 1.16             | 0.275957              | 1.30             |
| LOC101867150 |                                              | 20 55090660 55102701   | 0.004458              | 2.40             | 0.564564              | 1.50             | 0.651342              | -1.21            |
| LOC102137481 |                                              | 4 137807211 137809996  | 0.004458              | 2.02             | 0.880087              | -1.11            | 0.010731              | 1.97             |
| ERH          | enhancer of rudimentary homolog              | 7 133941042 133958574  | 0.004458              | -1.33            | 0.970690              | -1.01            | 0.923619              | 1.02             |
| MAP3K7       | mitogen-activated protein kinase kinase ki   | 4 83350588 83419938    | 0.004458              | -1.38            | 0.501667              | 1.17             | 0.673937              | 1.07             |
| RFX1         | MHC class II regulatory factor RFX1 iso1     | 19 14312438 14345965   | 0.004461              | 1.40             | 0.807442              | -1.08            | 0.514117              | 1.11             |
| SPTAN1       | spectrin alpha chain, non-erythrocytic 1 is  | 15 10541308 10624518   | 0.004463              | 1.38             | 0.747180              | 1.09             | 0.571561              | -1.09            |
| SORCS1       | VPS10 domain-containing receptor SorCS       | 9 105701539 106291920  | 0.004468              | 4.88             | 0.006930              | 16.10            | 0.356263              | -1.89            |
| DBP          | uncharacterized protein LOC101926570         | 19 49463997 49470773   | 0.004470              | 1.97             | 0.289491              | -1.60            | 0.687648              | -1.14            |
| CFAP46       | cilia- and flagella-associated protein 46 is | 9 132289951 132414471  | 0.004501              | 3.26             | 0.893639              | 1.17             | 0.502519              | -1.47            |
| LOC102142722 |                                              | 4 26520191 26534938    | 0.004501              | 2.80             | 0.768077              | 1.30             | 0.063184              | 2.38             |
| LOC102138293 |                                              | 14 49439406 49442048   | 0.004501              | -6.12            | 0.642529              | -2.47            | 0.938718              | 1.09             |
| TEKT4        | tektin-4                                     | 15 108672277 108677536 | 0.004518              | 3.95             | 0.745812              | 1.47             | 0.790941              | -1.22            |
| LOC102119952 |                                              | 3 108437294 108438049  | 0.004533              | 1.48             | 0.437141              | -1.24            | 0.508655              | 1.13             |
| LRIG1        | leucine-rich repeats and immunoglobulin-     | 2 121979035 122103738  | 0.004561              | 1.66             | 0.929140              | 1.05             | 0.978558              | 1.01             |
| CLCA4        | calcium-activated chloride channel regula    | 1 140719107 140754989  | 0.004562              | -6.78            | 0.920804              | -1.20            | 0.552928              | -1.65            |
| GTPBP1       | GTP-binding protein 1 isoform X2             | 10 12483786 12515168   | 0.004565              | 1.28             | 0.390165              | -1.16            | 0.995497              | -1.00            |
| CTN          | cingulin                                     | 1 100440191 100459772  | 0.004567              | 1.68             | 0.662401              | 1.19             | 0.908879              | -1.03            |
| TMEM260      | transmembrane protein 260 isoform X1         | 7 120847683 120909721  | 0.004567              | -1.36            | 0.602755              | -1.13            | 0.420083              | -1.12            |

| Gene symbol  | Gene name                                   | chr_start_end          | Day3 adjusted P-value | Day3 fold change | Day5 adjusted P-value | Day5 fold change | Day7 adjusted P-value | Day7 fold change |
|--------------|---------------------------------------------|------------------------|-----------------------|------------------|-----------------------|------------------|-----------------------|------------------|
| ARHGEF37     | rho guanine nucleotide exchange factor 37   | 6 148927057 148965399  | 0.004630              | 2.22             | 0.987179              | -1.01            | 0.442264              | -1.33            |
| MRS2         | magnesium transporter MRS2 homolog, n       | 4 146158268 146175379  | 0.004630              | -1.33            | 0.321264              | 1.21             | 0.435147              | 1.11             |
| LOC101867390 |                                             | 6 37335 74977          | 0.004673              | -2.83            | 0.690954              | 1.39             | 0.193160              | -1.80            |
| USP11        | ubiquitin carboxyl-terminal hydrolase 11    | X 45689773 45706452    | 0.004693              | 1.30             | 0.903627              | 1.03             | 0.426678              | -1.10            |
| MBNL1        | muscleblind-like protein 1 isoform X9       | 2 54617550 54818962    | 0.004693              | -1.55            | 0.471328              | 1.25             | 0.658072              | 1.10             |
| LOC102142105 | Ig heavy chain V-I region 5-like            | 13 18966461 18966963   | 0.004707              | 3.38             | 0.145692              | -2.64            | 0.495055              | -1.40            |
| STX12        | syntaxin-12 isoform X1                      | 1 200392753 200443708  | 0.004707              | -1.29            | 0.001252              | 1.52             | 0.894922              | -1.02            |
| C1SD2        | uncharacterized protein LOC101926114        | 5 102189977 102209499  | 0.004707              | -1.46            | 0.937967              | 1.03             | 0.802958              | 1.05             |
| C5H4orf3     | uncharacterized protein C4orf3 homolog      | 5 118453150 118454933  | 0.004707              | -1.48            | 0.548535              | 1.19             | 0.474043              | 1.14             |
| CLCA2        | calcium-activated chloride channel regula   | 1 140843605 140873988  | 0.004729              | 3.86             | 0.494657              | -1.96            | 0.176913              | 2.23             |
| LOC102142509 | Ig heavy chain V-I region 5-like            | 13 18949481 18949982   | 0.004729              | 3.55             | 0.787544              | 1.33             | 0.624738              | 1.34             |
| DCAF17       | DDB1- and CUL4-associated factor 17         | 12 60396820 60420100   | 0.004729              | -1.46            | 0.035299              | -1.58            | 0.605166              | 1.10             |
| C4H6orf141   | uncharacterized protein C6orf141 homolo     | 4 121065158 121065895  | 0.004729              | -2.54            | 0.085276              | -2.71            | 0.507636              | -1.34            |
| LOC107130511 | putative V-set and immunoglobulin doma      | 7 171303866 171304434  | 0.004760              | 3.30             | 0.913575              | -1.13            | 0.750778              | -1.19            |
| RAB14        | ras-related protein Rab-14                  | 15 16103676 16116482   | 0.004760              | -1.34            | 0.366808              | 1.20             | 0.655711              | 1.07             |
| CD244        | natural killer cell receptor 2B4 isoform X  | 1 90773178 90806829    | 0.004774              | 1.57             | 0.973774              | 1.02             | 0.026812              | 1.48             |
| SRCAP        | helicase SRCAP isoform X1                   | 20 29327850 29370379   | 0.004774              | 1.20             | 0.199566              | -1.16            | 0.356645              | -1.08            |
| SMIM20       | small integral membrane protein 20          | 5 25134358 25149082    | 0.004774              | -1.24            | 0.883156              | -1.03            | 0.326111              | -1.10            |
| CCNH         | cyclin-H                                    | 6 85769821 85788195    | 0.004774              | -1.31            | 0.645797              | 1.10             | 0.593831              | -1.07            |
| LOC107129552 |                                             | 4 129416180 129419495  | 0.004774              | -1.71            | 0.005945              | 2.32             | 0.001503              | -2.00            |
| LOC102146407 |                                             | 11 16731050 16838603   | 0.004774              | -3.59            | 0.878397              | 1.21             | 0.191375              | -1.98            |
| EXOSC8       | exosome complex component RRP43             | 17 16399124 16407778   | 0.004824              | -1.28            | 0.193414              | -1.23            | 0.735513              | 1.04             |
| LOC102127781 | tripartite motif-containing protein 60      | 5 164312450 164313874  | 0.004843              | -4.23            | 0.387726              | 2.37             | 0.615304              | 1.42             |
| SCARB1       | scavenger receptor class B member 1 isofo   | 11 129147658 129235039 | 0.004845              | 1.26             | 0.886381              | 1.03             | 0.398809              | -1.09            |
| CPNE3        | copine-3                                    | 8 87588743 87619987    | 0.004861              | -1.43            | 0.984610              | 1.01             | 0.799393              | 1.05             |
| STIM1        | stromal interaction molecule 1 isoform X    | 14 66550745 66769687   | 0.004869              | 1.33             | 0.988609              | -1.00            | 0.698932              | 1.06             |
| NHLRC1       | E3 ubiquitin-protein ligase NHLRC1          | 4 152525915 152527102  | 0.004898              | -1.55            | 0.981574              | -1.01            | 0.917642              | -1.03            |
| LOC107127721 | cytochrome b5 domain-containing protein     | 16 7964673 7984746     | 0.004920              | 1.41             | 0.480222              | 1.20             | 0.978457              | -1.01            |
| UBE2V2       | uncharacterized protein LOC101866470        | 8 48866543 48924671    | 0.004920              | -1.52            | 0.499887              | 1.23             | 0.475898              | 1.15             |
| FGFR1        | fibroblast growth factor receptor 1 isoform | 8 39233441 39278727    | 0.004971              | 1.60             | 0.280787              | -1.40            | 0.496163              | 1.16             |
| SLC44A4      | choline transporter-like protein 4          | 4 138977701 138996552  | 0.004981              | 1.67             | 0.518475              | -1.28            | 0.003100              | -1.77            |
| NUDT12       | peroxisomal NADH pyrophosphatase NU         | 6 102099422 102108752  | 0.005002              | -1.66            | 0.139927              | 1.59             | 0.092252              | 1.44             |
| KIAA1211     | uncharacterized protein KIAA1211 homo       | 5 78090018 78130272    | 0.005028              | 1.65             | 0.904352              | -1.06            | 0.018348              | 1.61             |
| TMEM50A      | transmembrane protein 50A                   | 1 203048728 203069804  | 0.005028              | -1.25            | 0.552139              | 1.10             | 0.502621              | 1.07             |
| LOC102121713 | pulmonary surfactant-associated protein A   | 9 56071137 56073839    | 0.005053              | -2.10            | 0.608292              | 1.34             | 0.569134              | -1.23            |
| STG6ALNAC1   | alpha-N-acetylgalactosaminide alpha-2,6-    | 16 74004984 74022956   | 0.005072              | 3.05             | 0.096847              | -3.19            | 0.336347              | -1.64            |
| LOC102127857 |                                             | 3 103159702 103315119  | 0.005101              | 5.89             | 0.071489              | -6.68            | 0.021223              | -5.13            |
| BAG6         | large proline-rich protein BAG6 isoform     | 4 139220460 139234977  | 0.005104              | 1.23             | 0.587854              | -1.09            | 0.933589              | -1.01            |
| NLRC3        | LOW QUALITY PROTEIN: protein NLR            | 20 3800798 3836148     | 0.005108              | 1.98             | 0.327427              | -1.54            | 0.054932              | 1.68             |
| LOXHD1       | lipoygenase homology domain-containin       | 18 35214722 35398023   | 0.005113              | 2.09             | 0.035315              | -2.49            | 0.430559              | 1.32             |
| HOGA1        | 4-hydroxy-2-oxoglutarate aldolase, mitoc    | 9 96397568 96426253    | 0.005165              | 2.12             | 0.904679              | -1.10            | 0.415197              | -1.31            |
| MAP6         | microtubule-associated protein 6 isoform    | 14 70895953 70977197   | 0.005165              | 1.88             | 0.785012              | -1.16            | 0.464074              | 1.24             |
| LVRN         | aminopeptidase Q                            | 6 114848225 114919587  | 0.005198              | 6.18             | 0.899803              | -1.26            | 0.052417              | -4.23            |
| RSPO1        | R-spondin-1                                 | 1 190187259 190203828  | 0.005216              | 3.06             | 0.280291              | 2.24             | 0.657910              | -1.28            |
| LOC102136769 | olfactory receptor 1411-like                | 1 1648667 1649614      | 0.005236              | -3.31            | 0.976357              | -1.04            | 0.171931              | -1.97            |
| LOC102119554 |                                             | 2 124909927 124916492  | 0.005236              | -6.50            | 0.865298              | 1.28             | 0.053072              | -3.23            |
| CHD8         | chromodomain-helicase-DNA-binding pro       | 7 84962938 85006027    | 0.005267              | 1.26             | 0.583525              | -1.10            | 0.959604              | 1.01             |
| YAE1D1       | LOW QUALITY PROTEIN: yae1 domain            | 3 80859217 80905543    | 0.005268              | -1.36            | 0.810974              | 1.07             | 0.769279              | 1.05             |
| ASH1L        | histone-lysine N-methyltransferase ASH1     | 1 96285051 96471896    | 0.005273              | 1.21             | 0.572754              | 1.09             | 0.823357              | 1.02             |
| PUS7L        |                                             | 11 42208517 42338749   | 0.005273              | -1.53            | 0.982070              | -1.01            | 0.091327              | 1.36             |
| L1TD1        | LINE-1 type transposase domain-containi     | 1 165197302 165202105  | 0.005359              | 5.59             | 0.863047              | 1.27             | 0.694970              | -1.34            |
| MAP3K7CL     | MAP3K7 C-terminal-like protein isoform      | 3 17771413 17812406    | 0.005360              | -2.59            | 0.886381              | 1.14             | 0.898966              | 1.07             |
| LOC102119605 | Ig lambda chain V-III region LOI-like       | 10 20203 20934         | 0.005417              | 3.51             | 0.135350              | 3.24             | 0.628846              | -1.34            |
| LOC102125237 |                                             | 4 133835 141251        | 0.005417              | -1.83            | 0.413423              | -1.43            | 0.480659              | -1.23            |
| SPR          | sepiapterin reductase                       | 13 36971048 36975080   | 0.005422              | -1.51            | 0.814321              | -1.09            | 0.855975              | 1.04             |
| PRR16        | protein Largen isoform X1                   | 6 119457788 119669900  | 0.005438              | -2.16            | 0.000501              | 4.32             | 0.320845              | 1.42             |
| LOC102116403 |                                             | 6 80612152 80657769    | 0.005455              | -2.46            | 0.486224              | 1.55             | 0.006071              | 2.49             |
| LOC102139585 | pseudouridine-5'-phosphatase                | 18 42361411 42362055   | 0.005456              | 1.91             | 0.573604              | -1.32            | 0.361333              | 1.32             |
| CD79A        | B-cell antigen receptor complex-associat    | 19 42375114 42377589   | 0.005464              | 2.72             | 0.458135              | -1.70            | 0.602729              | 1.29             |
| SLC4A8       | electroneutral sodium bicarbonate exchan    | 11 50332117 50414034   | 0.005485              | 3.48             | 0.942289              | 1.10             | 0.999780              | -1.00            |
| IIPKB        | inositol-trisphosphate 3-kinase B           | 1 85501096 85603830    | 0.005486              | 1.56             | 0.746254              | 1.13             | 0.551230              | 1.14             |
| ATXN2L       | ataxin-2-like protein isoform X13           | 20 27508777 27522889   | 0.005579              | 1.20             | 0.378056              | -1.12            | 0.950912              | -1.01            |
| SAA1         | serum amyloid A-1 protein                   | 14 49418219 49421125   | 0.005634              | -9.25            | 0.660491              | 2.82             | 0.703497              | -1.52            |
| JAML         | junctional adhesion molecule-like isoform   | 14 114172212 114193475 | 0.005664              | 1.90             | 0.297373              | -1.57            | 0.826537              | 1.08             |
| LOC102128790 |                                             | 19 35660874 35680964   | 0.005671              | 1.86             | 0.112633              | -1.75            | 0.265739              | -1.34            |
| CCDC8        | coiled-coil domain-containing protein 8     | 19 47167142 47168782   | 0.005671              | 1.43             | 0.242505              | -1.31            | 0.337435              | 1.17             |
| BCR          | breakpoint cluster region protein           | 10 28001765 28135507   | 0.005671              | 1.31             | 0.526059              | 1.14             | 0.001503              | -1.37            |
| REEP4        | receptor expression-enhancing protein 4     | 8 22275258 22278255    | 0.005671              | -1.46            | 0.166789              | -1.39            | 0.509465              | -1.13            |
| LOC102133235 | steroid 17-alpha-hydroxylase/17,20 lyase    | 9 101863817 101870740  | 0.005671              | -2.82            | 0.635906              | -1.51            | 0.897947              | -1.09            |
| RIMKLA       | N-acetylaspartylglutamate synthase A        | 1 185269569 185303664  | 0.005671              | -3.16            | 0.741371              | 1.46             | 0.167031              | 2.01             |
| LOC102129780 | serpin B8                                   | 18 16307995 16319548   | 0.005673              | -1.77            | 0.714529              | -1.19            | 0.745641              | -1.10            |
| WDR73        | WD repeat-containing protein 73             | 7 65131782 65143347    | 0.005679              | 1.29             | 0.993669              | 1.00             | 0.623927              | -1.07            |
| RAB31        | ras-related protein Rab-31                  | 18 70857665 71006283   | 0.005680              | -1.29            | 0.074388              | -1.32            | 0.000000              | 1.56             |
| LOC101925283 |                                             | 2 95386408 95394599    | 0.005720              | -1.79            | 0.000000              | -36.14           | 0.137332              | -1.46            |
| NAPG         | gamma-soluble NSF attachment protein        | 18 71664511 71687983   | 0.005728              | -1.51            | 0.297373              | 1.34             | 0.968081              | -1.01            |
| BOK          | bcl-2-related ovarian killer protein        | 12 131554135 131564246 | 0.005737              | -1.78            | 0.285787              | -1.51            | 0.000469              | -2.07            |
| TLR7         | tolllike receptor 7 isoform X1              | X 10612111 10633028    | 0.005744              | 1.97             | 0.986603              | -1.01            | 0.063819              | 1.70             |
| MBD6         | methyl-CpG-binding domain protein 6 iso     | 11 56505981 56510906   | 0.005744              | 1.21             | 0.261244              | -1.16            | 0.355333              | -1.09            |
| SKP1         | S-phase kinase-associated protein 1         | 6 133175536 133191340  | 0.005793              | -1.24            | 0.047496              | 1.29             | 0.523674              | 1.07             |
| INSIG2       | insulin-induced gene 2 protein isoform X    | 12 14095045 14107197   | 0.005793              | -1.43            | 0.980407              | 1.01             | 0.476549              | 1.13             |
| SELP         | P-selectin                                  | 1 27542456 27582768    | 0.005798              | 1.59             | 0.006889              | 1.97             | 0.339303              | -1.23            |
| UBE2D2       | ubiquitin-conjugating enzyme E2 D2 isof     | 6 138682417 138748453  | 0.005798              | -1.24            | 0.664661              | 1.08             | 0.419209              | 1.09             |
| PLPP6        | presqualene diphosphate phosphatase         | 15 74434383 74435273   | 0.005815              | -1.28            | 0.023139              | -1.38            | 0.837472              | -1.03            |
| LOC102119576 | T-cell receptor beta chain V region A20.2   | 3 175439295 175440073  | 0.005827              | -5.40            | 0.816727              | -1.43            | 0.885010              | -1.14            |
| BFAR         | bifunctional apoptosis regulator            | 20 15069325 15093441   | 0.005878              | -1.20            | 0.488582              | 1.10             | 0.188993              | -1.11            |
| ZFAND1       | AN1-type zinc finger protein 1 isoform X    | 8 82880050 82898298    | 0.005878              | -1.59            | 0.605365              | 1.20             | 0.959604              | -1.01            |
| LOC107128707 | cytochrome P450 2F5-like                    | 0 4227 4702            | 0.005898              | 25.68            | 1.000000              | -3.86            | 0.667700              | -2.06            |



| Gene symbol  | Gene name                                   | chr_start_end          | Day3 adjusted P-value | Day3 fold change | Day5 adjusted P-value | Day5 fold change | Day7 adjusted P-value | Day7 fold change |
|--------------|---------------------------------------------|------------------------|-----------------------|------------------|-----------------------|------------------|-----------------------|------------------|
| LOC102122997 | aldo-keto reductase family 1 member B10     | 3 167497180 167511480  | 0.005898              | -2.06            | 0.792531              | -1.19            | 0.980404              | -1.01            |
| TGDS         | uncharacterized protein LOC101926513        | 17 77196495 77217277   | 0.005923              | -1.34            | 0.369764              | 1.20             | 0.475706              | 1.11             |
| LOC102147033 | 10 kDa heat shock protein, mitochondrial    | 12 86691091 86693868   | 0.005923              | -1.45            | 0.773144              | 1.10             | 0.810309              | 1.05             |
| SRP9         | signal recognition particle 9 kDa protein   | 1 84585872 84598143    | 0.005926              | -1.75            | 0.428707              | 1.37             | 0.449625              | 1.22             |
| KCNE1        | potassium voltage-gated channel, Isk-relat  | 3 12320876 12327371    | 0.005927              | -1.76            | 0.280076              | 1.51             | 0.375862              | -1.27            |
| RNF223       | RING finger protein 223                     | 1 227351571 227352320  | 0.005970              | -6.32            | 0.335543              | -4.59            | 0.444922              | 1.95             |
| VPS29        | vacuolar protein sorting-associated protein | 11 114100688 114111632 | 0.005976              | -1.38            | 0.676597              | 1.11             | 0.713543              | 1.06             |
| SPTLC3       | serine palmitoyltransferase 3 isoform X1    | 10 49323088 49490780   | 0.006003              | 2.70             | 0.530675              | -1.51            | 0.287932              | 1.54             |
| MGATA4       | alpha-1,3-mannosyl-glycoprotein 4-beta-N    | 13 2851042 2970543     | 0.006016              | -1.67            | 0.760039              | 1.15             | 0.679770              | -1.11            |
| CLUAP1       | clusterin-associated protein 1 isoform X1   | 20 3755029 3793367     | 0.006036              | 1.46             | 0.976357              | -1.01            | 0.833176              | -1.04            |
| DCUN1D1      | DCN1-like protein 1 isoform X3              | 2 87584788 87620415    | 0.006036              | -1.51            | 0.224218              | 1.39             | 0.583858              | 1.12             |
| LOC102131829 | trafficking protein particle complex subun  | 1 133983215 133983778  | 0.006042              | 3.61             | 0.628119              | -1.59            | 0.623602              | -1.35            |
| ATG4C        | cysteine protease ATG4C isoform X1          | 1 164502775 164602432  | 0.006042              | -1.49            | 0.329284              | 1.31             | 0.246756              | 1.24             |
| AGK          | acylglycerol kinase, mitochondrial isoform  | 3 174608073 174705522  | 0.006042              | -1.59            | 0.339717              | -1.36            | 0.031104              | -1.51            |
| ASIP         | agouti-signaling protein                    | 10 65664826 65681219   | 0.006061              | 2.62             | 0.000974              | 5.77             | 0.211854              | -1.73            |
| CATIP        | ciliogenesis-associated TTC17-interacting   | 12 108007898 108021711 | 0.006065              | 4.14             | 0.809413              | 1.43             | 0.161653              | -2.58            |
| ARHGEF18     | rho guanine nucleotide exchange factor 18   | 19 7630552 7783209     | 0.006096              | 1.74             | 0.493075              | 1.32             | 0.906633              | -1.04            |
| MRPS36       | 28S ribosomal protein S36, mitochondria     | 6 69036017 69048340    | 0.006096              | -1.24            | 0.741002              | 1.06             | 0.922154              | -1.01            |
| DCTN6        | dynactin subunit 6 isoform X2               | 8 30713052 30741744    | 0.006108              | -1.24            | 0.207748              | 1.20             | 0.900691              | 1.02             |
| CIH1orf228   | uncharacterized protein C1orf228 homolo     | 1 182814844 182849029  | 0.006154              | 2.95             | 0.578551              | 1.55             | 0.517925              | -1.39            |
| KIF1A        | kinesin-like protein KIF1A isoform X13      | 12 130646663 130734145 | 0.006154              | 2.13             | 0.362561              | 1.60             | 0.279311              | 1.45             |
| HAS3         | hyaluronan synthase 3                       | 20 57392610 57399087   | 0.006154              | 1.67             | 0.546203              | -1.26            | 0.915396              | 1.03             |
| TIGIT        | T-cell immunoreceptor with Ig and ITIM      | 2 157957021 157969586  | 0.006170              | 2.11             | 0.137359              | -1.99            | 0.859395              | -1.07            |
| HK3          | hexokinase-3                                | 6 176666792 176681514  | 0.006170              | -2.11            | 0.761647              | -1.22            | 0.737723              | -1.14            |
| LOC102121891 | histone H2B type 1-F/J/L-like               | 4 144325155 144325535  | 0.006197              | -2.75            | 0.779716              | -1.27            | 0.494070              | 1.39             |
| ACPI         | low molecular weight phosphotyrosine pr     | 13 110932482 110946932 | 0.006234              | -1.29            | 0.944153              | 1.02             | 0.709882              | 1.05             |
| TECPR1       | tectonin beta-propeller repeat-containing p | 3 42419244 42453737    | 0.006234              | 1.38             | 0.027592              | -1.51            | 0.791927              | -1.05            |
| LOC102144925 | 0 131 3218                                  | 0 131 3218             | 0.006239              | -1.74            | 0.075557              | -1.79            | 0.368655              | 1.29             |
| LOC102131772 | LOW QUALITY PROTEIN: L-lactate de           | 12 38487739 38488826   | 0.006239              | -2.15            | 0.974839              | 1.03             | 0.474043              | 1.30             |
| DPY19L3      | probable C-mannosyltransferase DPY19L       | 19 32741182 32816496   | 0.006258              | -1.36            | 0.416588              | 1.19             | 0.137298              | 1.22             |
| NAE1         | NEDD8-activating enzyme E1 regulatory       | 20 54941860 54971520   | 0.006258              | -1.41            | 0.816784              | 1.08             | 0.268000              | 1.19             |
| GLOD4        | glyoxalase domain-containing protein 4 is   | 16 572465 592133       | 0.006258              | -1.45            | 0.736979              | -1.11            | 0.631186              | -1.09            |
| CMAS         | N-acylneuraminatase cytidylyltransferase    | 11 22742644 22761149   | 0.006258              | -1.43            | 0.761411              | 1.10             | 0.462360              | 1.14             |
| ICT1         | peptidyl-tRNA hydrolase ICT1, mitochon      | 16 72258490 72269934   | 0.006263              | -1.23            | 0.003432              | -1.39            | 0.686273              | 1.04             |
| TMEM52       | transmembrane protein S2 isoform X1         | 1 226503774 226505135  | 0.006329              | 3.15             | 0.963658              | -1.06            | 0.909238              | -1.07            |
| SPIDR        | DNA repair-scaffolding protein isoform X    | 8 48230517 48557635    | 0.006387              | -1.66            | 0.057868              | -1.78            | 0.492094              | 1.18             |
| NANOS1       | nanos homolog 1                             | 9 118240412 118247164  | 0.006409              | -2.10            | 0.399171              | 1.54             | 0.722467              | 1.14             |
| RAB27B       | ras-related protein Rab-27B                 | 18 25678537 25691110   | 0.006469              | 1.86             | 0.038089              | 2.12             | 0.439883              | 1.25             |
| ARL6IP6      | ADP-ribosylation factor-like protein 6-int  | 12 41466185 41508048   | 0.006469              | -1.32            | 0.346545              | 1.20             | 0.845229              | 1.03             |
| CALM2        | uncharacterized protein LOC101865168        | 13 63214827 63229392   | 0.006469              | -1.36            | 0.511316              | 1.16             | 0.810939              | 1.04             |
| GMNN         | geminin                                     | 4 145787150 145795667  | 0.006469              | -1.45            | 0.190049              | -1.37            | 0.553204              | 1.12             |
| DNASE2B      | deoxyribonuclease-2-beta isoform X2         | 1 142841951 142858344  | 0.006473              | 1.84             | 0.028401              | 2.16             | 0.221893              | -1.41            |
| NOTCH1       | neurogenic locus notch homolog protein 1    | 15 1795344 1846965     | 0.006473              | 1.40             | 0.600038              | 1.15             | 0.221250              | 1.21             |
| NBR1         | next to BRCA1 gene 1 protein isoform X      | 16 54933909 54967276   | 0.006473              | 1.30             | 0.756266              | -1.07            | 0.897257              | 1.02             |
| TMCO1        | uncharacterized protein LOC101926540        | 1 23800667 23840488    | 0.006502              | -1.29            | 0.973217              | -1.01            | 0.820660              | 1.03             |
| LOC102146409 | 4 638696 657413                             | 0.006550               | -6.28                 | 0.989138         | 1.03                  | 0.325523         | -2.19                 |                  |
| MRPS10       | mitochondrial ribosomal protein S10         | 4 128395145 128409152  | 0.006557              | -1.31            | 0.981651              | -1.01            | 0.410944              | 1.11             |
| TEX26        | testis-expressed sequence 26 protein isofo  | 17 10519347 10561313   | 0.006623              | -2.11            | 0.001222              | 4.57             | 0.462187              | -1.31            |
| LOC102139546 | 7 164705143 164707092                       | 0.006637               | -3.21                 | 0.003216         | -9.78                 | 0.857310         | -1.12                 |                  |
| PLEKH6       | pleckstrin homology domain-containing f     | 1 62701987 62853130    | 0.006666              | 1.90             | 0.458135              | 1.42             | 0.903112              | -1.05            |
| CRAMP1       | protein cramped-like isoform X1             | 20 1667569 1729719     | 0.006666              | 1.28             | 0.448966              | -1.15            | 0.443425              | -1.10            |
| SMARCC2      | SWI/SNF complex subunit SMARCC2 iso         | 11 55085689 55111640   | 0.006666              | 1.27             | 0.792076              | -1.06            | 0.850281              | 1.03             |
| DMBT1        | deleted in malignant brain tumors 1 protei  | 9 121863878 121969707  | 0.006678              | 11.97            | 0.102010              | 15.40            | 0.115180              | 5.62             |
| LOC102120222 | 11 131518390 131564248                      | 0.006678               | -2.94                 | 0.716372         | 1.41                  | 0.689996         | -1.26                 |                  |
| LOC107128788 | 2 26290423 26306201                         | 0.006678               | -6.33                 | 0.031991         | 16.42                 | 0.460714         | 1.77                  |                  |
| LOC102129462 | NACHT, LRR and PYD domains-contain          | 0 1959 7153            | 0.006678              | 2.59             | 0.588651              | -1.62            | 0.678032              | 1.26             |
| BLOC1S2      | biogenesis of lysosome-related organelles   | 9 99186087 99195121    | 0.006680              | -1.30            | 0.947258              | -1.02            | 0.823012              | -1.03            |
| LOC102133947 | Ig heavy chain V-II region COR-like         | 0 54423 54964          | 0.006697              | 3.32             | 0.936995              | -1.10            | 0.001418              | 3.37             |
| TEK12        | tektin-2 isoform X1                         | 1 191775919 191779018  | 0.006697              | 2.22             | 0.967726              | 1.04             | 0.001404              | -2.83            |
| LOC102121133 | uncharacterized protein LOC102121133        | 4 144060494 144115506  | 0.006697              | 1.55             | 0.970871              | 1.02             | 0.684166              | 1.10             |
| BTG3         | protein BTG3                                | 3 29666724 29682111    | 0.006709              | -1.35            | 0.311814              | -1.23            | 0.278495              | -1.16            |
| BCL9         | B-cell CLL/lymphoma 9 protein isoform 1     | 1 103447640 103460730  | 0.006760              | 1.21             | 0.360675              | -1.13            | 0.014623              | 1.21             |
| ELFN2        | protein phosphatase 1 regulatory subunit 2  | 10 13896718 13899180   | 0.006810              | 2.45             | 0.416165              | -1.72            | 0.387130              | -1.44            |
| MCC          | colorectal mutant cancer protein isoform X  | 6 111787653 112265775  | 0.006840              | 1.72             | 0.273590              | 1.51             | 0.309049              | 1.30             |
| RUBCN        | run domain Beclin-1 interacting and cyste   | 6 135160668 135197435  | 0.006840              | 1.17             | 0.444522              | -1.09            | 0.117250              | -1.12            |
| FAM200B      | protein FAM200B isoform X2                  | 5 14777937 14786805    | 0.006855              | -1.48            | 0.919108              | -1.04            | 0.455467              | 1.15             |
| LOC102124737 | putative V-set and immunoglobulin doma      | 0 510131 511242        | 0.006907              | 2.89             | 0.900496              | 1.14             | 0.563120              | 1.35             |
| ACACA        | acetyl-CoA carboxylase 1 isoform X4         | 16 48519901 48848382   | 0.006907              | 1.43             | 0.187260              | -1.37            | 0.512225              | -1.12            |
| MFS8         | major facilitator superfamily domain-cont   | 5 126862389 126915615  | 0.006907              | -1.45            | 0.741584              | 1.11             | 0.726581              | -1.07            |
| CD40LG       | CD40 ligand                                 | X 133428387 133439513  | 0.006957              | 1.78             | 0.337563              | -1.46            | 0.000092              | 2.16             |
| LOC107129729 | 5 60312303 60317949                         | 0.006957               | -1.55                 | 0.258493         | 1.41                  | 0.180751         | -1.31                 |                  |
| F10          | coagulation factor X                        | 17 95616155 95644246   | 0.006986              | 2.78             | 0.439886              | 1.79             | 0.458372              | 1.46             |
| JADE2        | protein Jade-2 isoform X2                   | 6 133580936 133633277  | 0.006986              | 1.23             | 0.107372              | 1.23             | 0.375426              | 1.09             |
| SLC38A6      | probable sodium-coupled neutral amino a     | 7 125299789 125355072  | 0.006986              | -2.09            | 0.919974              | 1.08             | 0.863779              | 1.07             |
| CBX3         | chromobox protein homolog 3 isoform X       | 3 94565321 94574402    | 0.007024              | -1.45            | 0.533741              | 1.19             | 0.455484              | 1.14             |
| CLSTN2       | calyntenin-2 isoform X1                     | 2 42082368 42719330    | 0.007033              | 2.85             | 0.473787              | 1.75             | 0.821796              | -1.14            |
| GJB4         | gap junction beta-4 protein                 | 1 193164184 193164984  | 0.007033              | -3.01            | 0.753713              | -1.36            | 0.637212              | -1.29            |
| LKAAEAR1     | LOW QUALITY PROTEIN: protein LKA            | 10 96304835 96305817   | 0.007065              | 7.99             | 0.697829              | 2.05             | 0.925059              | -1.12            |
| LOC107128595 | 4 27118 33791                               | 0.007124               | -2.28                 | 0.545603         | -1.48                 | 0.905989         | 1.06                  |                  |
| MERTK        | tyrosine-protein kinase Mer                 | 13 16074960 16208151   | 0.007132              | -1.85            | 0.732975              | 1.20             | 0.442221              | 1.26             |
| LOC102140310 | 7 170036440 170067295                       | 0.007282               | -2.33                 | 0.778436         | -1.25                 | 0.301520         | -1.54                 |                  |
| FAM169A      | soluble lamin-associated protein of 75 kD   | 6 72997482 73056344    | 0.007284              | -3.05            | 0.312996              | 2.45             | 0.403142              | 1.56             |
| ABL2         | Abelson tyrosine-protein kinase 2 isoform   | 1 37047943 37169722    | 0.007326              | -1.27            | 0.615291              | 1.10             | 0.005290              | -1.30            |
| KLHL23       | kelch-like protein 23                       | 12 58614219 58629142   | 0.007326              | -1.65            | 0.167735              | 1.57             | 0.213336              | 1.34             |
| CHRD1L       | chordin-like protein 1 isoform X2           | X 107754349 107869782  | 0.007365              | 1.58             | 0.076022              | 1.65             | 0.563302              | 1.14             |
| MFSD10       | major facilitator superfamily domain-cont   | 5 3015887 3019902      | 0.007365              | 1.31             | 0.052284              | -1.38            | 0.673016              | -1.06            |
| USP46        | ubiquitin carboxyl-terminal hydrolase 46    | 5 81856431 81923998    | 0.007379              | -1.34            | 0.682007              | -1.11            | 0.070562              | 1.26             |

| Gene symbol  | Gene name                                    | chr_start_end          | Day3 adjusted P-value | Day3 fold change | Day5 adjusted P-value | Day5 fold change | Day7 adjusted P-value | Day7 fold change |
|--------------|----------------------------------------------|------------------------|-----------------------|------------------|-----------------------|------------------|-----------------------|------------------|
| TTC39B       | tetrapeptide repeat protein 39B isoform      | 15 63464040 63605414   | 0.007400              | -1.53            | 0.205168              | 1.43             | 0.251850              | 1.26             |
| LOC102118943 |                                              | 10 87440941 87463255   | 0.007400              | -2.85            | 0.312314              | 2.10             | 0.648591              | -1.28            |
| USMG5        | up-regulated during skeletal muscle growth   | 9 102450056 102450319  | 0.007409              | -1.29            | 0.740921              | -1.08            | 0.931069              | -1.01            |
| LOC102127938 | mitochondrial inner membrane protein OX      | 7 86447953 86453759    | 0.007455              | 1.20             | 0.264616              | -1.15            | 0.969193              | 1.00             |
| TUBB2A       | tubulin beta-2A chain                        | 4 167929220 167934404  | 0.007498              | -1.65            | 0.884951              | 1.08             | 0.251876              | -1.31            |
| KLHL28       | uncharacterized protein LOC101866978         | 7 109180074 109296489  | 0.007498              | -1.67            | 0.190971              | 1.57             | 0.249085              | 1.32             |
| TAGAP        | T-cell activation Rho GTPase-activating p    | 4 11759924 11768684    | 0.007561              | 1.57             | 0.652354              | 1.18             | 0.356582              | 1.22             |
| HYDIN        | hydrocephalus-inducing protein homolog       | 20 61430556 61819472   | 0.007569              | 4.79             | 0.932102              | 1.16             | 0.281197              | -2.26            |
| LOC102172816 |                                              | 16 42732789 42752414   | 0.007569              | 2.07             | 0.058741              | -2.04            | 0.004606              | -2.25            |
| CDC47L       | cell division cycle-associated 7-like protei | 3 98789061 98832582    | 0.007569              | 1.35             | 0.156866              | -1.31            | 0.699682              | -1.06            |
| SPATA5L1     | spermatogenesis-associated protein 5-like    | 7 22309289 22327874    | 0.007569              | -1.34            | 0.817301              | 1.07             | 0.657041              | 1.07             |
| RFK          | riboflavin kinase isoform X2                 | 15 87170302 87176690   | 0.007569              | -2.01            | 0.369856              | 1.57             | 0.882399              | 1.06             |
| FEM1C        | protein fem-1 homolog C                      | 6 114360776 114379465  | 0.007631              | -1.66            | 0.326725              | 1.42             | 0.094298              | 1.46             |
| CAPN13       | calpain-13 isoform X1                        | 13 79942356 79999092   | 0.007635              | 8.78             | 0.831014              | -1.56            | 0.806828              | -1.35            |
| SERPIN2      | plasminogen activator inhibitor 2            | 18 16446288 16458989   | 0.007653              | -3.19            | 0.000562              | 8.93             | 0.058093              | -2.58            |
| SLC2A9       | solute carrier family 2, facilitated glucose | 5 8962754 8992127      | 0.007661              | 1.91             | 0.788238              | -1.17            | 0.031492              | 1.81             |
| CERKL        | ceramide kinase-like protein isoform X1      | 12 70509578 70639412   | 0.007722              | 3.49             | 0.911867              | -1.18            | 0.969454              | 1.03             |
| ABHD3        | phospholipase ABHD3 isoform X3               | 18 60622251 60672362   | 0.007722              | -1.33            | 0.851741              | 1.05             | 0.832835              | -1.03            |
| TFPI         | trefoil factor 1                             | 3 4402693 4406969      | 0.007730              | -3.37            | 0.037576              | -4.09            | 0.362408              | -1.77            |
| SLC16A11     | LOW QUALITY PROTEIN: monocarbox              | 16 7070169 7072077     | 0.007734              | 4.26             | 0.474399              | -2.17            | 0.010736              | -4.40            |
| LSM1         | U6 snRNA-associated Sm-like protein LS       | 8 38975334 38988599    | 0.007760              | -1.19            | 0.842269              | 1.04             | 0.137694              | -1.13            |
| TSPAN13      | tetraspanin-13                               | 3 103951299 103981065  | 0.007780              | -1.69            | 0.286745              | 1.48             | 0.980663              | -1.01            |
| SNRNP200     | U5 small nuclear ribonucleoprotein 200 k     | 13 1088803 1118600     | 0.007870              | 1.32             | 0.909986              | -1.03            | 0.699682              | 1.06             |
| LOC102131789 | cytochrome P450 26B1 isoform X1              | 13 37763418 37778985   | 0.007870              | 2.97             | 0.701682              | 1.43             | 0.420083              | -1.55            |
| ZNF518A      | zinc finger protein 518A                     | 9 94855916 94860361    | 0.007870              | -1.50            | 0.256208              | 1.37             | 0.712788              | 1.08             |
| FBR3         | probable fibrosin-1                          | 20 29282856 29293428   | 0.007892              | 1.18             | 0.425170              | -1.11            | 0.951616              | -1.01            |
| EFCAB12      | EF-hand calcium-binding domain-contain       | 11 87737803 87764907   | 0.007953              | 2.59             | 0.630243              | 1.47             | 0.554936              | -1.34            |
| IP6K1        | inositol hexakisphosphate kinase 1           | 2 104954578 104979706  | 0.007953              | 1.17             | 0.520720              | -1.08            | 0.602332              | -1.04            |
| GMFB         | glia maturation factor beta isoform X3       | 7 118687329 118698445  | 0.007969              | -2.20            | 0.130038              | 2.17             | 0.418211              | 1.37             |
| LOC102145105 | inaD-like protein isoform X2                 | 1 165520620 165625661  | 0.008015              | 1.82             | 0.785607              | -1.16            | 0.844368              | 1.07             |
| LOC102130761 | mucin-16-like                                | 0 516 1749             | 0.008052              | 11.84            | 1.000000              | 1.87             | 0.234346              | -3.26            |
| VWA5A        | von Willebrand factor A domain-containi      | 14 119965225 119989516 | 0.008063              | 1.33             | 0.086271              | -1.36            | 0.605549              | 1.08             |
| KATNAL1      | katanin p60 ATPase-containing subunit A      | 17 9805302 9874892     | 0.008063              | -1.38            | 0.081238              | 1.42             | 0.986724              | 1.00             |
| SERPING1     | plasma protease C1 inhibitor                 | 14 16001381 16017859   | 0.008077              | 1.57             | 0.859712              | 1.08             | 0.814219              | 1.06             |
| ALG2         | alpha-1,3/1,6-mannosyltransferase ALG2       | 15 38545402 38549359   | 0.008119              | -1.40            | 0.787544              | 1.09             | 0.941476              | 1.02             |
| ZFAND6       | ANI-type zinc finger protein 6 isoform X     | 7 58584002 58601364    | 0.008132              | -1.48            | 0.406989              | 1.27             | 0.615134              | 1.11             |
| LOC102130541 | rho guanine nucleotide exchange factor 10    | 8 1790418 1801723      | 0.008157              | 1.72             | 0.162030              | 1.67             | 0.453589              | 1.23             |
| KCNQ1        | potassium voltage-gated channel subfamil     | 14 2387924 2808478     | 0.008179              | 1.50             | 0.020486              | 1.73             | 0.018328              | -1.49            |
| GRAP2        | GRB2-related adapter protein 2 isoform X     | 10 11189882 11233010   | 0.008188              | 1.61             | 0.579343              | -1.23            | 0.118738              | 1.39             |
| TAF1         | transcription initiation factor TFIID subun  | X 68372877 68470318    | 0.008230              | 1.25             | 0.635262              | 1.09             | 0.305326              | 1.12             |
| TMPRSS4      | transmembrane protease serine 4              | 14 114074480 114094549 | 0.008260              | 4.62             | 0.884096              | 1.27             | 0.001790              | -7.20            |
| GPC3         | glypican-3 isoform X1                        | X 130459368 130919014  | 0.008288              | 1.74             | 0.133450              | 1.72             | 0.520841              | 1.20             |
| CFAP77       | uncharacterized protein C9orf171 homolo      | 15 6243548 6320532     | 0.008293              | 3.38             | 0.676324              | 1.57             | 0.483679              | -1.55            |
| NUMA1        | nuclear mitotic apparatus protein 1 isoform  | 14 67132982 67166983   | 0.008442              | 1.35             | 0.557811              | -1.15            | 0.991297              | -1.00            |
| MXRA8        | matrix-remodeling-associated protein 8 iso   | 1 227061485 227066696  | 0.008442              | 1.33             | 0.000576              | -1.68            | 0.734399              | 1.05             |
| KCTD2        | BTB/POZ domain-containing protein KC         | 16 72298071 72315705   | 0.008465              | 1.38             | 0.798192              | 1.08             | 0.137694              | -1.25            |
| CHCHD1       | uncharacterized protein LOC101926265         | 9 61839113 61840211    | 0.008465              | -1.30            | 0.331237              | -1.20            | 0.583146              | -1.08            |
| TP53BP1      | tumor suppressor p53-binding protein 1 is    | 7 20363985 20475915    | 0.008521              | 1.20             | 0.907073              | -1.02            | 0.629393              | -1.05            |
| CD163L1      | scavenger receptor cysteine-rich type 1 pr   | 11 7775915 7855675     | 0.008537              | -2.41            | 0.590328              | -1.46            | 0.667589              | 1.22             |
| WDR19        | WD repeat-containing protein 19 isoform      | 5 38809347 38895921    | 0.008572              | 1.34             | 0.271539              | -1.26            | 0.649142              | -1.07            |
| UBE2A        | ubiquitin-conjugating enzyme E2 A isoform    | X 116279989 116289212  | 0.008572              | -1.27            | 0.586876              | 1.11             | 0.559233              | 1.07             |
| LOC102136916 |                                              | 1 174191208 174195849  | 0.008572              | -4.40            | 0.710945              | -1.59            | 0.250446              | -2.34            |
| CYFIP2       | cytoplasmic FMR1-interacting protein 2 is    | 6 156680169 156791984  | 0.008581              | 1.40             | 0.090823              | -1.43            | 0.658264              | 1.08             |
| LOC102122037 | Golgi integral membrane protein 4-like       | 0 38927 82629          | 0.008622              | -1.83            | 0.489111              | 1.37             | 0.506967              | 1.22             |
| MYH10        | myosin-10 isoform X3                         | 16 8601884 8754032     | 0.008624              | 1.82             | 0.363008              | 1.48             | 0.987662              | 1.01             |
| LOC102140021 |                                              | 14 32362359 32379339   | 0.008675              | -3.17            | 0.582956              | -1.66            | 0.723541              | 1.24             |
| LOC102135287 | pregnancy-specific beta-1-glycoprotein 2-    | 19 43995965 44012346   | 0.008682              | -28.83           | 0.071489              | 44.27            | 0.350078              | 3.98             |
| LOC107128352 |                                              | 20 18420225 18424890   | 0.008709              | 3.29             | 0.000461              | -81.05           | 0.016897              | -3.53            |
| SLC25A46     | solute carrier family 25 member 46 isoform   | 6 109462255 109488877  | 0.008709              | -1.90            | 0.180264              | 1.78             | 0.304659              | 1.37             |
| KACNA2D1     | voltage-dependent calcium channel subun      | 3 129653590 130153404  | 0.008723              | -1.71            | 0.204682              | 1.59             | 0.660406              | 1.13             |
| KCNIP4       | Kv channel-interacting protein 4             | 5 19890131 21123672    | 0.008723              | -5.48            | 0.030336              | 9.31             | 0.689178              | -1.43            |
| SLC2A5       | solute carrier family 2, facilitated glucose | 1 219201326 219239790  | 0.008725              | -2.94            | 0.906731              | -1.15            | 0.844389              | 1.13             |
| LOC102129412 | LIM domain-containing protein 1              | 2 100670289 100683798  | 0.008802              | -1.23            | 0.724475              | -1.07            | 0.911372              | -1.01            |
| ALOX15       | arachidonate 15-lipoxygenase                 | 16 4673979 4684465     | 0.008804              | 6.71             | 0.186690              | 5.39             | 0.484567              | -1.94            |
| PPP3CB       | serine/threonine-protein phosphatase 2B c    | 9 62055616 62100171    | 0.008804              | -1.35            | 0.163281              | 1.32             | 0.584277              | 1.09             |
| PCMT1        | protein-L-isopartate(D-aspartate) O-met      | 4 55714896 55775023    | 0.008804              | -1.37            | 0.440071              | 1.20             | 0.842485              | -1.04            |
| CPEB2        | cytoplasmic polyadenylation element-bind     | 5 14101447 14163733    | 0.008804              | -1.69            | 0.747864              | 1.16             | 0.284517              | 1.31             |
| DPCR1        | diffuse panbronchiolitis critical region pro | 4 140017832 140028291  | 0.008804              | -4.90            | 0.540722              | -2.23            | 0.717485              | -1.40            |
| CFAP157      | uncharacterized protein C9orf117 homolo      | 15 101058390 101065314 | 0.008807              | 6.76             | 0.978777              | -1.07            | 0.291697              | -2.72            |
| SALL2        | sal-like protein 2 isoform X1                | 7 85097600 85114414    | 0.008807              | 1.54             | 0.453986              | -1.27            | 0.960113              | -1.10            |
| SUMO1        | small ubiquitin-related modifier 1 isoform   | 12 91651106 91685230   | 0.008807              | -1.27            | 0.337401              | 1.18             | 0.979518              | -1.00            |
| LOC102126287 |                                              | 14 383171 385973       | 0.008807              | -3.45            | 0.954772              | 1.09             | 0.288513              | 1.88             |
| APLN         | apelin                                       | X 126523750 126529751  | 0.008856              | 2.25             | 0.134806              | 2.21             | 0.697643              | 1.18             |
| AFMID        | kynurenine formamidase                       | 16 75565571 75582000   | 0.008856              | 1.83             | 0.339562              | 1.52             | 0.701902              | -1.13            |
| TAF1D        | TATA box-binding protein-associated fac      | 14 89613800 89616927   | 0.008856              | -1.73            | 0.613561              | 1.25             | 0.864170              | -1.06            |
| PODN         | podocan                                      | 1 174352398 174372510  | 0.008859              | 1.89             | 0.233206              | 1.69             | 0.989703              | 1.01             |
| RNF146       | E3 ubiquitin-protein ligase RNF146 isofo     | 4 31381456 31388783    | 0.008859              | -1.28            | 0.653806              | 1.10             | 0.248947              | 1.15             |
| SNRNP2       | U2 small nuclear ribonucleoprotein B"        | 10 45525840 45535057   | 0.008871              | -1.25            | 0.856639              | 1.04             | 0.633388              | 1.06             |
| FAM174A      | membrane protein FAM174A                     | 6 99042659 99085984    | 0.008871              | -1.43            | 0.063099              | 1.52             | 0.339303              | 1.18             |
| CAPN9        | calpain-9 isoform X1                         | 1 18766179 18819979    | 0.008871              | -3.08            | 0.802222              | -1.30            | 0.906876              | -2.29            |
| CIH1orf64    | uncharacterized protein C1orf64 homolog      | 1 212411602 212413911  | 0.008871              | -4.20            | 0.154981              | 4.35             | 0.040315              | 3.45             |
| XRCC6BP1     | mitochondrial inner membrane protease A      | 11 56949785 56963692   | 0.008891              | -1.52            | 0.856618              | 1.08             | 0.991390              | 1.00             |
| PACS1        | phosphofurin acidic cluster sorting protei   | 14 8255935 8308685     | 0.008920              | 1.28             | 0.103576              | -1.30            | 0.678300              | 1.06             |
| LGALS8       | galactin-8 isoform X4                        | 1 12938595 12958617    | 0.008920              | 1.18             | 0.397691              | 1.11             | 0.580083              | -1.05            |
| RC3H1        | roquin-1 isoform X6                          | 1 31879607 31936932    | 0.008939              | -1.50            | 0.299528              | 1.35             | 0.938265              | 1.02             |
| MURC         | muscle-related coiled-coil protein           | 15 37151658 37159916   | 0.008990              | -1.92            | 0.468755              | 1.42             | 0.184407              | -1.50            |
| LOC102132661 | inaD-like protein isoform X2                 | 1 96411 151395         | 0.009018              | 1.64             | 0.813109              | -1.12            | 0.894926              | 1.04             |

| Gene symbol  | Gene name                                                                  | chr_start_end          | Day3 adjusted P-value | Day3 fold change | Day5 adjusted P-value | Day5 fold change | Day7 adjusted P-value | Day7 fold change |
|--------------|----------------------------------------------------------------------------|------------------------|-----------------------|------------------|-----------------------|------------------|-----------------------|------------------|
| CA11         | carbonic anhydrase-related protein 11 isoform X1                           | 19 49471813 49480227   | 0.009047              | 1.66             | 0.917594              | 1.06             | 0.058401              | -1.53            |
| NMRK2        | nicotinamide riboside kinase 2 isoform X1                                  | 19 3942059 3946151     | 0.009047              | -5.01            | 0.908135              | -1.16            | 0.089106              | 3.07             |
| UBE2F        | NEDD8-conjugating enzyme UBE2F isoform X1                                  | 12 127814759 127883944 | 0.009049              | -1.21            | 0.248150              | -1.17            | 0.193215              | -1.13            |
| C7H14orf142  | uncharacterized protein C14orf142 homolog 1                                | 7 158218741 158222098  | 0.009049              | -1.29            | 0.669107              | 1.10             | 0.555037              | 1.08             |
| ROBO2        | roundabout homolog 2 isoform X9                                            | 2 190445386 191806671  | 0.009049              | -2.00            | 0.814566              | -1.16            | 0.492094              | 1.27             |
| NDUFA5       | NADH dehydrogenase [ubiquinone] 1 alpha subunit                            | 3 156343402 156359868  | 0.009050              | -1.42            | 0.061996              | 1.50             | 0.551381              | 1.11             |
| STX3         | syntaxin-3 isoform X5                                                      | 14 14298535 14353390   | 0.009062              | -1.56            | 0.051634              | -1.70            | 0.528399              | -1.15            |
| LOC102121902 | Ig lambda chain V-II region MGC-like                                       | 10 8332 9042           | 0.009089              | 6.84             | 0.995631              | 1.01             | 0.280431              | -2.70            |
| CHGB         | secretogranin-1 isoform X3                                                 | 10 56572663 56586141   | 0.009107              | 7.33             | 0.165285              | -11.85           | 0.302006              | -2.84            |
| LOC107130720 |                                                                            | 8 146504423 146510835  | 0.009215              | -3.73            | 0.573770              | 1.73             | 0.241042              | -1.98            |
| PCNP         | PEST proteolytic signal-containing nuclear protein                         | 2 170553248 170571224  | 0.009217              | -1.54            | 0.111181              | 1.57             | 0.509872              | 1.16             |
| BRD2         | uncharacterized protein LOC101865351                                       | 4 137834826 137841694  | 0.009261              | 1.18             | 0.512911              | -1.09            | 0.930758              | 1.01             |
| TCEB1        | transcription elongation factor B polypeptide 1                            | 8 75119497 75131928    | 0.009289              | -1.26            | 0.784782              | 1.06             | 0.605589              | -1.07            |
| CHIC2        | cysteine-rich hydrophobic domain-containing protein 2                      | 5 80432842 80481424    | 0.009289              | -1.37            | 0.468676              | 1.19             | 0.946167              | 1.01             |
| UBE2E1       | ubiquitin-conjugating enzyme E2 E1 isoform X1                              | 2 23541966 23671731    | 0.009289              | -1.46            | 0.328141              | 1.30             | 0.521149              | 1.13             |
| WDFY1        | WD repeat and FYVE domain-containing protein 1                             | 12 113651015 113719234 | 0.009310              | -1.53            | 0.324287              | 1.35             | 0.115637              | 1.36             |
| CCDC81       | coiled-coil domain-containing protein 81                                   | 14 81946949 81994467   | 0.009417              | 4.63             | 0.995190              | 1.01             | 0.707769              | -1.39            |
| ABAT         | 4-aminobutyrate aminotransferase, mitochondrial                            | 20 9040086 9088847     | 0.009417              | 1.57             | 0.875055              | -1.08            | 0.580115              | 1.14             |
| ZFX4         | zinc finger homeobox protein 4 isoform X1                                  | 8 77867894 78031584    | 0.009430              | -4.49            | 0.656415              | 1.77             | 0.914982              | -1.10            |
| MED12        | mediator of RNA polymerase II transcription subunit 12                     | X 68118462 68141549    | 0.009544              | 1.22             | 0.557811              | -1.10            | 0.834287              | 1.02             |
| MYOC         | myocilin                                                                   | 1 29616693 29632117    | 0.009550              | 3.83             | 0.636992              | -1.69            | 0.471056              | -1.65            |
| KIAA0922     | transmembrane protein 131-like isoform X1                                  | 5 152704838 152876523  | 0.009550              | 1.26             | 0.453770              | 1.14             | 0.628090              | 1.06             |
| GBF1         | Golgi-specific brefeldin A-resistance guanine nucleotide exchange factor 1 | 9 101258403 101384812  | 0.009550              | 1.20             | 0.651759              | -1.07            | 0.951126              | 1.01             |
| NIPA1        | magnesium transporter NIPA1 isoform X1                                     | 7 873922 891084        | 0.009550              | -1.28            | 0.480212              | 1.14             | 0.530384              | 1.08             |
| RECK         | reversion-inducing cysteine-rich protein with Kazal motifs                 | 15 42927143 43015537   | 0.009583              | 1.67             | 0.021931              | 2.03             | 0.439516              | 1.22             |
| ASB2         | ankyrin repeat and SOCS box protein 2 isoform X1                           | 7 158965773 158997154  | 0.009583              | 1.64             | 0.954085              | 1.03             | 0.773588              | -1.08            |
| TXNDC15      | thioredoxin domain-containing protein 15                                   | 6 133944409 133969096  | 0.009667              | -1.25            | 0.439131              | 1.14             | 0.185636              | 1.15             |
| SPHAR        | protein SPHAR                                                              | 1 20281437 20281664    | 0.009716              | -3.96            | 0.140985              | 3.82             | 0.665168              | 1.37             |
| LOC102126540 |                                                                            | 0 177592 242877        | 0.009738              | 10.62            | 0.283433              | -4.73            | 0.581822              | -1.73            |
| PLXNA4       | plexin-A4                                                                  | 3 164924371 165305280  | 0.009738              | 2.13             | 0.962660              | 1.05             | 0.848046              | -1.09            |
| SLC9B2       | mitochondrial sodium/hydrogen exchanger 2                                  | 5 102368111 102405915  | 0.009738              | -1.61            | 0.404759              | -1.34            | 0.703160              | -1.10            |
| LOC107128640 | Ig heavy chain V-III region 23-like                                        | 0 195344 195904        | 0.009794              | 4.77             | 0.683225              | -1.58            | 0.845059              | -1.15            |
| TTC32        | tetratricopeptide repeat protein 32                                        | 13 91105590 91110339   | 0.009794              | -1.56            | 0.397328              | 1.32             | 0.681137              | -1.10            |
| LOC102138750 | histone H1.2                                                               | 4 144516119 144516760  | 0.009840              | -1.66            | 0.520208              | -1.29            | 0.533079              | 1.18             |
| DRC3         | leucine-rich repeat-containing protein 48 isoform X1                       | 16 18306823 18353181   | 0.009852              | 4.37             | 0.631188              | 1.85             | 0.215695              | -2.45            |
| EFHC2        | EF-hand domain-containing family member 2                                  | X 42433905 42619468    | 0.009852              | 1.83             | 0.694214              | -1.24            | 0.724838              | 1.13             |
| CLCA1        | calcium-activated chloride channel regulator 1                             | 1 140797020 140830670  | 0.009866              | 17.29            | 0.624033              | 3.23             | 0.825602              | 1.44             |
| TEF          | thyrotroph embryonic factor isoform X3                                     | 10 9712379 9740771     | 0.009927              | 2.16             | 0.917974              | 1.09             | 0.623602              | 1.22             |
| NOG          | noggin                                                                     | 16 42073415 42074113   | 0.009935              | -2.80            | 0.909992              | 1.14             | 0.453100              | 1.46             |
| LOC102141792 | uncharacterized protein LOC102141792 isoform X1                            | 3 30658698 30820412    | 0.009938              | -2.32            | 0.879651              | 1.14             | 0.847820              | -1.10            |
| TSN          | translin isoform X2                                                        | 12 10289493 10322100   | 0.009960              | -1.31            | 0.922695              | 1.03             | 0.353176              | 1.13             |
| MYO10        | unconventional myosin-X isoform X2                                         | 6 17095606 17376588    | 0.010043              | 1.43             | 0.646108              | -1.15            | 0.135974              | 1.28             |
| FAM193A      | protein FAM193A isoform X1                                                 | 5 2629874 2784015      | 0.010058              | 1.21             | 0.873950              | 1.03             | 0.915854              | -1.01            |
| KRAS         | GTPase KRas isoform X2                                                     | 11 25857881 25895774   | 0.010058              | -1.52            | 0.399171              | 1.30             | 0.467419              | 1.17             |
| CCNC         | cyclin-C isoform X1                                                        | 4 74242291 74267221    | 0.010071              | -1.58            | 0.557811              | 1.24             | 0.874898              | 1.04             |
| RHOD         | rho-related GTP-binding protein RhoD isoform X1                            | 14 7422308 7438523     | 0.010112              | -1.57            | 0.658921              | -1.18            | 0.001798              | -1.74            |
| IFI6         | uncharacterized protein LOC101925937 isoform X1                            | 1 200556323 200559260  | 0.010112              | -1.87            | 0.596444              | 1.31             | 0.566235              | -1.21            |
| ABHD12B      | abhydrolase domain-containing protein 12B                                  | 7 115084031 115113829  | 0.010112              | -3.57            | 0.795840              | 1.37             | 0.240661              | -2.05            |
| BARD1        | BRC1-associated RING domain protein 1                                      | 12 104332224 104416360 | 0.010127              | -1.53            | 0.912276              | 1.05             | 0.124602              | 1.37             |
| SLIT3        | slit homolog 3 protein                                                     | 6 168241980 168851577  | 0.010129              | 1.90             | 0.806946              | 1.16             | 0.681411              | -1.15            |
| RBX1         | ring-box 1, E3 ubiquitin protein ligase                                    | 10 10180584 10203512   | 0.010164              | -1.27            | 0.866264              | 1.04             | 0.004902              | -1.31            |
| SMNDC1       | survival of motor neuron-related-splicing factor 1                         | 9 109478420 109487925  | 0.010171              | -1.63            | 0.179139              | 1.56             | 0.492448              | 1.19             |
| CTSL         | cathepsin L1                                                               | 15 98392771 98396608   | 0.010200              | -3.89            | 0.550531              | -1.92            | 0.834202              | -1.18            |
| LOC107126545 | zinc finger protein 665                                                    | 19 50943419 50944831   | 0.010226              | 2.02             | 0.529887              | -1.43            | 0.887510              | 1.06             |
| LOC102139381 | Ig kappa chain V-II region Cum-like                                        | 13 17990439 17991278   | 0.010246              | 3.91             | 0.375557              | 2.39             | 0.486799              | 1.57             |
| NDST2        | bifunctional heparan sulfate N-deacetylase                                 | 9 61812301 61823996    | 0.010246              | 1.21             | 0.310621              | -1.16            | 0.022976              | 1.21             |
| FAM163B      | protein FAM163B                                                            | 15 5078612 5079795     | 0.010259              | 3.17             | 0.034674              | 5.33             | 0.613190              | -1.39            |
| ATP6V1G1     | V-type proton ATPase subunit G 1                                           | 15 22978986 22988404   | 0.010265              | -1.48            | 0.999136              | 1.00             | 0.806828              | -1.06            |
| DCHS2        | protocadherin-23 isoform X1                                                | 5 153464153 153731637  | 0.010290              | 2.97             | 0.351605              | 2.13             | 0.413640              | 1.54             |
| ACTR6        | actin-related protein 6 isoform X3                                         | 11 103975454 103999442 | 0.010290              | -1.66            | 0.298899              | 1.46             | 0.511909              | 1.19             |
| BEST1        | bestrophin-1 isoform X2                                                    | 14 12250954 12265177   | 0.010290              | -2.23            | 0.859712              | -1.16            | 0.965308              | -1.02            |
| LOC101926212 | uncharacterized protein LOC101926212 isoform X1                            | 1 65727491 65765923    | 0.010348              | 3.50             | 0.668957              | -1.58            | 0.000000              | 48.14            |
| LOC102133490 |                                                                            | 9 94548617 94566692    | 0.010348              | -3.27            | 0.814566              | -1.36            | 0.291611              | -1.76            |
| NFE2         | transcription factor NF-E2 45 kDa subunit                                  | 11 53206128 53209337   | 0.010368              | 2.47             | 0.016241              | 3.75             | 0.555399              | -1.33            |
| MCEE         | methylmalonyl-CoA epimerase, mitochondrial                                 | 13 38790461 38806603   | 0.010390              | -1.22            | 0.954110              | -1.01            | 0.337435              | -1.10            |
| LOC102128651 |                                                                            | 9 96545167 96549512    | 0.010475              | -1.36            | 0.652908              | 1.13             | 0.688003              | -1.07            |
| CBFA2T2      | protein CBFA2T2 isoform X1                                                 | 10 64936203 64981770   | 0.010530              | 1.31             | 0.788446              | -1.07            | 0.668883              | 1.06             |
| LOC102124328 |                                                                            | 5 51171430 51178180    | 0.010542              | -3.65            | 0.006898              | -9.82            | 0.995872              | 1.00             |
| LOC102126915 | tripartite motif-containing protein 60                                     | 5 164284854 164286266  | 0.010582              | -15.02           | 1.000000              | 3.51             | 1.000000              | 3.74             |
| LOC102132587 | cytochrome c oxidase assembly protein COX6B                                | 16 40433918 40471208   | 0.010618              | -1.40            | 0.105452              | 1.43             | 0.923819              | 1.02             |
| LOC102115582 | choline transporter-like protein 2 isoform X1                              | 19 10885636 10919054   | 0.010660              | 1.76             | 0.954800              | 1.04             | 0.505907              | 1.21             |
| LOC102120751 | leucine-rich repeat-containing protein 47-1                                | 20 20968 21339         | 0.010660              | 1.69             | 0.921315              | 1.06             | 0.681690              | 1.12             |
| CROCC        | rotletin isoform X3                                                        | 1 211542023 211593169  | 0.010660              | 1.52             | 0.770629              | -1.12            | 0.851787              | -1.05            |
| TBX1         | T-box transcription factor TBX1                                            | 10 31681660 31708532   | 0.010678              | 1.85             | 0.594690              | -1.31            | 0.966399              | -1.02            |
| MAP3K4       | mitogen-activated protein kinase kinase kinase 4                           | 4 9840937 9967483      | 0.010688              | 1.28             | 0.732489              | -1.08            | 0.951736              | -1.01            |
| TNFAIP8L1    | tumor necrosis factor alpha-induced protein 8-like 1                       | 19 4734876 4735436     | 0.010734              | 1.70             | 0.995631              | -1.00            | 0.675303              | -1.12            |
| ZNF766       | zinc finger protein 766 isoform X1                                         | 19 52989278 53002381   | 0.010747              | 1.17             | 0.649346              | -1.06            | 0.595931              | 1.05             |
| TSPAN9       | tetraspanin-9 isoform X1                                                   | 11 3401456 3481480     | 0.010823              | 1.40             | 0.590757              | 1.16             | 0.442221              | 1.14             |
| FAM184A      | protein FAM184A isoform X6                                                 | 4 22939335 23065129    | 0.010859              | 2.08             | 0.668138              | -1.31            | 0.085131              | -1.78            |
| BANK1        | B-cell scaffold protein with ankyrin repeats                               | 5 101095386 101411273  | 0.010859              | 1.74             | 0.357235              | -1.47            | 0.542628              | -1.19            |
| LOC107128046 |                                                                            | 1 199245001 199251889  | 0.010861              | 2.51             | 0.132622              | -2.89            | 0.446146              | -1.44            |
| CYSRT1       | cysteine-rich tail protein 1                                               | 15 1051680 1052114     | 0.010861              | -3.04            | 0.404952              | 2.02             | 0.122516              | -2.23            |
| RBM15        | putative RNA-binding protein 15                                            | 1 116384378 116391293  | 0.010913              | -1.48            | 0.894518              | 1.06             | 0.997204              | 1.00             |
| TIRAP        | toll/interleukin-1 receptor domain-containing adapter protein 1            | 14 122117349 122120104 | 0.010940              | 1.47             | 0.832133              | -1.09            | 0.379748              | 1.19             |
| VASH1        | vasohibin-1 isoform X1                                                     | 7 141495596 141511114  | 0.010940              | 1.35             | 0.235680              | -1.28            | 0.781869              | -1.05            |
| YOD1         | ubiquitin thioesterase OTU1                                                | 1 65627573 65629588    | 0.010940              | -1.85            | 0.568053              | 1.33             | 0.569550              | 1.20             |
| ZNF548       | zinc finger protein 548 isoform X2                                         | 19 58047591 58058037   | 0.010945              | 1.80             | 0.992863              | -1.01            | 0.372985              | 1.31             |



| Gene symbol  | Gene name                                                         | chr_start_end          | Day3 adjusted P-value | Day3 fold change | Day5 adjusted P-value | Day5 fold change | Day7 adjusted P-value | Day7 fold change |
|--------------|-------------------------------------------------------------------|------------------------|-----------------------|------------------|-----------------------|------------------|-----------------------|------------------|
| LOC101865759 |                                                                   | 14 11406210 11410436   | 0.010980              | -1.58            | 0.320885              | 1.40             | 0.288667              | -1.27            |
| GIPR         | gastric inhibitory polypeptide receptor                           | 19 46485603 46501523   | 0.010997              | 2.82             | 0.701804              | -1.44            | 0.924825              | 1.05             |
| B4GALNT1     | beta-1,4 N-acetylgalactosaminyltransferase                        | 11 56611863 56617377   | 0.011003              | 1.62             | 0.754222              | -1.15            | 0.130652              | 1.41             |
| HNRNPDL      | heterogeneous nuclear ribonucleoprotein L                         | 5 52030461 52034144    | 0.011020              | -1.34            | 0.175800              | 1.32             | 0.569720              | 1.09             |
| LOC102119006 |                                                                   | 15 32935545 32945646   | 0.011067              | -2.24            | 0.625736              | 1.39             | 0.705558              | -1.18            |
| PENK         | proenkephalin-A isoform X1                                        | 8 57499856 57504589    | 0.011081              | 9.27             | 0.566440              | -3.20            | 0.796194              | -1.48            |
| SHISA8       | putative protein shisa-8                                          | 10 9158962 9163706     | 0.011081              | 6.29             | 0.644927              | -2.13            | 0.570345              | 1.58             |
| LOC102146902 | T-cell receptor beta chain V region C5-like                       | 3 17542477 17542538    | 0.011081              | 3.50             | 0.766102              | -1.35            | 0.018397              | 3.11             |
| CFAP58       | cilia- and flagella-associated protein 58 isoform 1               | 9 103433986 103544542  | 0.011081              | 2.50             | 0.062620              | 3.14             | 0.141263              | -1.92            |
| TMEM94       | uncharacterized protein KIAA0195 homolog                          | 16 72766664 72795423   | 0.011081              | 1.29             | 0.315580              | -1.21            | 0.728621              | -1.05            |
| SUPT5H       | transcription elongation factor SPT5 isoform 1                    | 19 39955960 39991645   | 0.011081              | 1.25             | 0.509813              | -1.12            | 0.700692              | 1.05             |
| LOC102115861 | histone-lysine N-methyltransferase 2B                             | 19 36171265 36188125   | 0.011081              | 1.19             | 0.538770              | -1.09            | 0.870609              | -1.02            |
| DEGS1        | sphingolipid delta(4)-desaturase DES1                             | 1 82816765 82825957    | 0.011081              | -1.30            | 0.230254              | 1.25             | 0.506092              | 1.09             |
| LOC107127325 | uncharacterized protein LOC107127325                              | 1 7832574 7833635      | 0.011081              | -1.45            | 0.681721              | 1.14             | 0.991297              | 1.00             |
| VARS2        | valine--tRNA ligase, mitochondrial isoform 4                      | 4 140042895 140054977  | 0.011081              | -1.96            | 0.521284              | -1.41            | 0.855099              | 1.08             |
| CAAP1        | caspase activity and apoptosis inhibitor 1                        | 15 51898884 51950284   | 0.011131              | -1.62            | 0.174128              | 1.57             | 0.396819              | 1.23             |
| LOC107127076 | Ig kappa chain V-III region VG-like                               | 13 19257987 19258509   | 0.011159              | 3.39             | 0.072251              | 2.94             | 0.131723              | 1.85             |
| BRPF3        | bromodomain and PHD finger-containing protein 3                   | 4 134511232 134544703  | 0.011373              | 1.37             | 0.908403              | 1.04             | 0.778641              | -1.05            |
| CUTC         | copper homeostasis protein cutC homolog                           | 9 98614405 98636234    | 0.011373              | -1.23            | 0.150351              | 1.23             | 0.582030              | 1.06             |
| NXP3         | neurexophilin-3                                                   | 16 34956885 34959954   | 0.011475              | 1.85             | 0.628597              | 1.29             | 0.407622              | 1.30             |
| SH3BP4       | SH3 domain-binding protein 4                                      | 12 124848610 124867533 | 0.011520              | 1.44             | 0.878397              | 1.06             | 0.717485              | 1.08             |
| LOC102125344 |                                                                   | 11 66613846 66635054   | 0.011549              | -7.53            | 0.279617              | 3.75             | 0.859925              | -1.17            |
| DNAI2        | dynein intermediate chain 2, axonemal                             | 16 71506725 71543714   | 0.011569              | 2.86             | 0.747510              | -1.38            | 0.561791              | 1.40             |
| TMEM170B     | transmembrane protein 170B                                        | 4 159275940 159311184  | 0.011575              | -1.79            | 0.042192              | 2.11             | 0.232331              | 1.41             |
| KIAA2012     | uncharacterized protein KIAA2012 homolog                          | 12 91505590 91648524   | 0.011589              | 3.79             | 0.552743              | 2.13             | 0.523406              | -1.59            |
| LOC107130914 | protein very KIND-like                                            | 9 132634122 132657584  | 0.011603              | 8.27             | 1.000000              | 1.41             | 0.848046              | -1.23            |
| LRP2BP       | LRP2-binding protein isoform X2                                   | 5 184755325 184765484  | 0.011603              | 1.66             | 0.928207              | 1.05             | 0.253916              | -1.33            |
| ICAM3        | intercellular adhesion molecule 3                                 | 19 10611783 10621362   | 0.011603              | 1.53             | 0.539409              | -1.24            | 0.052417              | 1.46             |
| SERAC1       | protein SERAC1 isoform X2                                         | 4 64527061 64575990    | 0.011603              | -1.27            | 0.775061              | 1.07             | 0.998297              | 1.00             |
| SRSF2        | serine/arginine-rich splicing factor 2 isoform 1                  | 16 74117285 74118284   | 0.011603              | -1.34            | 0.633991              | 1.13             | 0.883132              | 1.03             |
| ST6GALNAC4   | ST6 (alpha-N-acetylneuraminyl-2,3-beta-D-galactosyl)transferase 4 | 15 100831193 100839810 | 0.011603              | -1.35            | 0.029023              | -1.50            | 0.233914              | -1.19            |
| SNAPC3       | snRNA-activating protein complex subunit 3                        | 15 63268278 63315020   | 0.011607              | -1.30            | 0.887333              | -1.04            | 0.532488              | 1.09             |
| METTL7B      | methyltransferase-like protein 7B                                 | 11 54576100 54578355   | 0.011607              | -1.67            | 0.211340              | -1.55            | 0.905144              | -1.04            |
| DDX52        | probable ATP-dependent RNA helicase DDX52                         | 16 49060931 49092017   | 0.011638              | -1.32            | 0.871866              | -1.05            | 0.170525              | 1.20             |
| ATN1         | atrophin-1 isoform X1                                             | 11 7243292 7251152     | 0.011657              | 1.26             | 0.779127              | -1.06            | 0.741790              | -1.04            |
| DONSON       | protein downstream neighbor of Son                                | 3 13173151 13183100    | 0.011672              | -1.39            | 0.909241              | 1.04             | 0.585283              | -1.10            |
| PPM1F        | protein phosphatase 1F                                            | 10 29782839 29806649   | 0.011680              | 1.30             | 0.095207              | 1.34             | 0.618523              | 1.07             |
| GON4L        | GON-4-like protein isoform X1                                     | 1 95931441 96032290    | 0.011680              | 1.20             | 0.959075              | -1.01            | 0.997677              | 1.00             |
| LOC102125757 | olfactory receptor 140-like                                       | 14 17330568 17357840   | 0.011680              | -8.08            | 0.129800              | 18.33            | 0.000244              | -30.65           |
| CCDC9        | coiled-coil domain-containing protein 9 isoform 1                 | 19 48058834 48072663   | 0.011714              | 1.27             | 0.948058              | -1.02            | 0.381375              | -1.11            |
| LIN7C        | protein lin-7 homolog C                                           | 14 39987300 39995212   | 0.011714              | -1.74            | 0.053753              | 1.97             | 0.596078              | 1.17             |
| PAX9         | paired box protein Pax-9                                          | 7 100624158 100638524  | 0.011745              | 5.67             | 0.560816              | -2.42            | 0.643912              | 1.59             |
| SAMD4B       | protein Smad4 homolog 2 isoform X1                                | 19 39861252 39894825   | 0.011745              | 1.25             | 0.846266              | -1.05            | 0.755566              | -1.04            |
| DMGDH        | dimethylglycine dehydrogenase, mitochondrial                      | 6 77290007 77360256    | 0.011768              | 2.37             | 0.719964              | 1.32             | 0.976496              | 1.02             |
| KIAA1217     | sickle tail protein homolog                                       | 9 24566806 25059884    | 0.011768              | 1.49             | 0.790546              | -1.11            | 0.906068              | -1.03            |
| SGMS2        | phosphatidylcholine:ceramide cholinephosphotransferase 2          | 5 107283412 107297435  | 0.011775              | -1.79            | 0.133441              | 1.81             | 0.418257              | -1.27            |
| FAM3D        | protein FAM3D isoform X2                                          | 2 114012355 114034519  | 0.011781              | 6.10             | 0.201736              | 5.69             | 0.439936              | -2.07            |
| RBM26        | RNA-binding protein 26 isoform X14                                | 17 61861610 61953053   | 0.011782              | -1.41            | 0.466139              | 1.22             | 0.361389              | 1.17             |
| LOC107129867 |                                                                   | 5 183742458 183753925  | 0.011802              | -1.67            | 0.033765              | -2.00            | 0.250701              | -1.34            |
| LOC102136915 | Ig heavy chain V-III region 23-like isoform 1                     | 7 171609206 171609779  | 0.011816              | 2.75             | 0.902110              | 1.15             | 0.514603              | 1.41             |
| ADARB2       | double-stranded RNA-specific adenosine deaminase 2                | 9 1378114 1915644      | 0.011819              | 3.97             | 0.116618              | 4.38             | 0.233882              | 2.96             |
| EIF5A2       | eukaryotic translation initiation factor 5A-2                     | 2 75088010 75102801    | 0.011900              | -1.90            | 0.324253              | 1.61             | 0.447304              | 1.29             |
| LOC107130427 |                                                                   | 7 122542979 122551040  | 0.011912              | 2.20             | 0.663338              | -1.34            | 0.191438              | 1.65             |
| PCSK6        | proprotein convertase subtilisin/kexin type 6                     | 7 82274341 82425232    | 0.011917              | 1.74             | 0.588688              | 1.29             | 0.816647              | -1.08            |
| LOC101865543 |                                                                   | 1 140412860 140463261  | 0.011927              | -1.43            | 0.241653              | 1.35             | 0.731933              | 1.07             |
| LOC107130355 | T-cell receptor alpha chain V region HPB                          | 7 85789399 85790091    | 0.011929              | -2.03            | 0.811909              | -1.18            | 0.347719              | 1.39             |
| PIFO         | protein pitchfork isoform X1                                      | 1 115422614 115440325  | 0.011998              | 1.95             | 0.269302              | -1.71            | 0.213963              | -1.51            |
| SS18L1       | calcium-responsive transactivator isoform 1                       | 10 94126893 94150817   | 0.011998              | -1.43            | 0.795294              | -1.10            | 0.317837              | -1.20            |
| VCPKM7       | protein-lysine methyltransferase METTL2                           | 7 114320045 114327217  | 0.011998              | -1.68            | 0.150662              | 1.68             | 0.889881              | 1.05             |
| ZNF609       | zinc finger protein 609 isoform X1                                | 7 41946508 42147678    | 0.012037              | 1.27             | 0.929174              | -1.02            | 0.857760              | 1.03             |
| ZNF367       | zinc finger protein 367                                           | 15 110536718 110564853 | 0.012040              | -1.93            | 0.633694              | 1.30             | 0.439091              | 1.30             |
| SMIM12       | small integral membrane protein 12                                | 1 193069163 193069441  | 0.012053              | -1.23            | 0.865661              | -1.04            | 0.101594              | -1.17            |
| LOC102119992 | Ig lambda chain V-II region BUR-like                              | 10 7681 8387           | 0.012058              | 3.25             | 0.385622              | 2.14             | 0.805761              | 1.18             |
| CEACAM8      | carcinoembryonic antigen-related cell adhesion molecule 8         | 19 43122585 43134304   | 0.012058              | 2.59             | 0.529535              | 1.64             | 0.509872              | 1.41             |
| RNF44        | RING finger protein 44 isoform X1                                 | 6 176296222 176299424  | 0.012058              | 1.27             | 0.509050              | -1.14            | 0.518414              | 1.09             |
| RAC1         | uncharacterized LOC101866593                                      | 3 41695514 41715044    | 0.012058              | -1.12            | 0.474258              | 1.07             | 0.063664              | -1.10            |
| SNRNP27      | U4/U6.U5 small nuclear ribonucleoprotein 27                       | 13 40039800 40049443   | 0.012058              | -1.24            | 0.271883              | 1.19             | 0.671697              | 1.05             |
| TRMT13       | tRNA:m(4)X modification enzyme TRMT13                             | 1 126697021 126712608  | 0.012058              | -1.62            | 0.691084              | 1.19             | 0.416031              | 1.23             |
| TMEM167A     | protein kish-A                                                    | 6 81325502 81347481    | 0.012058              | -1.64            | 0.345872              | 1.42             | 0.583858              | 1.16             |
| TMED5        | transmembrane emp24 domain-containing protein 5                   | 1 133779620 133780737  | 0.012058              | -2.00            | 0.192053              | 1.89             | 0.654744              | 1.18             |
| SKIL         | ski-like protein isoform X1                                       | 2 74584870 74615802    | 0.012058              | -2.05            | 0.110948              | 2.15             | 0.584625              | 1.23             |
| GPC5         | glypican-5 isoform X1                                             | 17 74072974 75496498   | 0.012080              | -2.12            | 0.163868              | -2.03            | 0.438689              | 1.34             |
| SLCO1A2      | solute carrier organic anion transporter family 1 member 2        | 11 21980957 22042530   | 0.012135              | 5.94             | 0.469689              | 3.58             | 0.864170              | -1.21            |
| RFC3         | uncharacterized protein LOC101865965                              | 17 13364238 13382454   | 0.012192              | -1.56            | 0.861085              | 1.09             | 0.606913              | 1.13             |
| CCDC82       | coiled-coil domain-containing protein 82                          | 14 92230395 92254750   | 0.012227              | -1.51            | 0.874985              | 1.07             | 0.217201              | 1.29             |
| B3GNT2       | N-acetyllactosaminide beta-1,3-N-acetylglucosaminyltransferase II | 13 47815355 47816548   | 0.012354              | -1.54            | 0.199566              | 1.48             | 0.111444              | 1.39             |
| RAP2C        | ras-related protein Rap-2c isoform X1                             | X 129108348 129111466  | 0.012361              | -2.06            | 0.289491              | 1.76             | 0.646875              | 1.20             |
| RHEB         | GTP-binding protein Rheb                                          | 3 184173468 184225807  | 0.012409              | -1.29            | 0.779716              | 1.07             | 0.715813              | 1.05             |
| BRMS1L       | breast cancer metastasis-suppressor 1-like protein 1              | 7 99781732 99831495    | 0.012563              | -1.52            | 0.324204              | 1.36             | 0.695135              | 1.10             |
| AGAP1        | arf-GAP with GTPase, ANK repeat and PDZ domain                    | 12 125320784 125970039 | 0.012581              | 1.32             | 0.762494              | 1.08             | 0.959944              | 1.01             |
| DAXX         | death domain-associated protein 6 isoform 1                       | 4 137462006 137466161  | 0.012581              | 1.19             | 0.407480              | -1.12            | 0.712788              | -1.04            |
| LOC102119102 |                                                                   | 5 8722 14508           | 0.012670              | -1.66            | 0.608270              | 1.24             | 0.481898              | -1.21            |
| PPP2R1B      | serine/threonine-protein phosphatase 2A regulatory subunit 1B     | 14 107690515 107740182 | 0.012720              | -1.30            | 0.343862              | 1.21             | 0.896210              | 1.02             |
| CIB3         | calcium and integrin-binding family member 3                      | 19 16411961 16420475   | 0.012791              | 10.34            | 0.917294              | 1.40             | 0.674607              | -1.85            |
| TMEM70       | transmembrane protein 70, mitochondrial                           | 8 75149886 75155216    | 0.012791              | -1.48            | 0.957725              | -1.03            | 0.303419              | 1.23             |
| LOC102143631 | leukocyte immunoglobulin-like receptor 5                          | 19 55499209 55515064   | 0.012841              | -2.13            | 0.958714              | -1.05            | 0.926624              | -1.04            |
| MOK          | MAPK/MAK/MRK overlapping kinase isoform 1                         | 7 167450928 167527198  | 0.012881              | 1.48             | 0.447555              | 1.25             | 0.557783              | -1.13            |

| Gene symbol  | Gene name                                                               | chr_start_end          | Day3 adjusted P-value | Day3 fold change | Day5 adjusted P-value | Day5 fold change | Day7 adjusted P-value | Day7 fold change |
|--------------|-------------------------------------------------------------------------|------------------------|-----------------------|------------------|-----------------------|------------------|-----------------------|------------------|
| C3           | complement C3                                                           | 19 6869966 6920218     | 0.012888              | 1.88             | 0.416165              | 1.49             | 0.735404              | -1.13            |
| C1H8orf59    | uncharacterized protein LOC101925831                                    | 1 82264092 82264394    | 0.012888              | -1.29            | 0.851892              | -1.05            | 0.881222              | 1.02             |
| NDUFA4       | uncharacterized protein LOC101926042                                    | 4 76926371 76933006    | 0.012888              | -1.49            | 0.407480              | 1.29             | 0.814366              | 1.06             |
| MEGF6        | multiple epidermal growth factor-like domain                            | 1 224870641 224992546  | 0.012901              | 1.64             | 0.581528              | -1.26            | 0.190998              | 1.37             |
| ST6GALNAC2   | alpha-N-acetylgalactosaminide alpha-2,6-galactosyltransferase 2         | 16 73949051 73968781   | 0.012932              | 2.15             | 0.394750              | -1.72            | 0.398829              | -1.42            |
| LOC102145470 | uncharacterized protein LOC102145470                                    | 8 96312855 96360609    | 0.012932              | -1.82            | 0.575340              | -1.31            | 0.013960              | -1.86            |
| ARHGAP10     | rho GTPase-activating protein 10 isoform 1                              | 5 146908796 147253345  | 0.012997              | -1.29            | 0.884951              | -1.04            | 0.142309              | -1.20            |
| SMARCD1      | SWI/SNF-related matrix-associated actin-dependent nuclear corepressor 1 | 11 48943222 48957040   | 0.013105              | 1.20             | 0.966374              | 1.01             | 0.305610              | 1.10             |
| CLOCK        | circadian locomotor output cycles protein                               | 5 78998365 79046534    | 0.013105              | -1.40            | 0.059608              | 1.52             | 0.569612              | 1.11             |
| LOC102138476 | ovostatin homolog 2-like                                                | 11 9858989 9906273     | 0.013105              | 7.90             | 0.600387              | 3.14             | 0.169107              | 4.57             |
| MAPK8IP1     | C-Jun-amino-terminal kinase-interacting protein 1                       | 14 21698062 21706977   | 0.013154              | 1.44             | 0.938287              | 1.03             | 0.548572              | -1.12            |
| EEF1E1       | eukaryotic translation elongation factor 1 epsilon                      | 4 162841648 162864358  | 0.013154              | -1.42            | 0.557014              | 1.19             | 0.733130              | 1.07             |
| ADORA2B      | adenosine receptor A2b                                                  | 16 16904333 16933701   | 0.013154              | -1.83            | 1.000000              | -1.00            | 0.557288              | -1.21            |
| HSPA14       | heat shock 70 kDa protein 14                                            | 9 15358388 15390610    | 0.013174              | -1.30            | 0.782746              | 1.07             | 0.500001              | 1.10             |
| LRRN4CL      | LRRN4 C-terminal-like protein                                           | 14 11580205 11580921   | 0.013220              | 2.90             | 0.557614              | 1.69             | 0.650395              | -1.29            |
| BCORL1       | BCL-6 corepressor-like protein 1 isoform 1                              | X 126875244 126927215  | 0.013220              | 1.39             | 0.975344              | 1.01             | 0.741699              | 1.06             |
| GSAP         | gamma-secretase-activating protein isoform 1                            | 3 134861631 134972482  | 0.013220              | -1.42            | 0.560019              | -1.19            | 0.393101              | -1.17            |
| LOC102119426 | mannose-binding protein A-like                                          | 9 55987862 55990875    | 0.013228              | -2.55            | 0.996470              | 1.00             | 0.684414              | -1.24            |
| LOC102123205 | uncharacterized protein LOC102123205                                    | 16 73491465 73503369   | 0.013269              | 3.76             | 0.777477              | -1.48            | 0.320969              | -1.97            |
| BTG2         | protein BTG2                                                            | 1 61776947 61778712    | 0.013269              | 1.32             | 0.855754              | -1.05            | 0.082351              | -1.25            |
| PKP4         | plakophilin 4                                                           | 12 47213244 47441080   | 0.013292              | 1.35             | 0.109547              | 1.39             | 0.992051              | 1.00             |
| LOC102138752 | uncharacterized protein CXorf21                                         | X 78329193 78330098    | 0.013292              | -2.67            | 0.559345              | 1.65             | 0.471757              | 1.48             |
| MICU3        | calcium uptake protein 3, mitochondrial isoform 1                       | 8 17014296 17104749    | 0.013297              | -1.69            | 0.332591              | 1.48             | 0.246756              | 1.36             |
| LOC107130822 | uncharacterized protein LOC107130822                                    | 9 46904738 46907924    | 0.013351              | 18.93            | 1.000000              | -5.79            | 0.199640              | -7.09            |
| LRRC56       | leucine-rich repeat-containing protein 56 isoform 1                     | 14 359020 370906       | 0.013351              | 1.53             | 0.888987              | -1.07            | 0.173848              | -1.34            |
| KCTD7        | BTB/POZ domain-containing protein KCTD7                                 | 3 55665185 55684728    | 0.013351              | 1.44             | 0.968876              | -1.02            | 0.995800              | -1.00            |
| RNF167       | E3 ubiquitin-protein ligase RNF167 isoform 1                            | 16 5018687 5022730     | 0.013351              | 1.26             | 0.536254              | -1.12            | 0.508805              | -1.08            |
| FAM49A       | protein FAM49A                                                          | 13 94369743 94404378   | 0.013351              | 1.24             | 0.597149              | 1.10             | 0.226002              | 1.14             |
| TRIM44       | tripartite motif-containing protein 44 isoform 1                        | 14 31558093 31765148   | 0.013351              | 1.18             | 0.939276              | 1.01             | 0.129051              | 1.13             |
| TARDBP       | TAR DNA-binding protein 43                                              | 1 217115901 217127571  | 0.013351              | -1.14            | 0.202262              | 1.13             | 0.629475              | 1.04             |
| RIOK1        | uncharacterized protein LOC101925429                                    | 4 163546121 163574461  | 0.013351              | -1.19            | 0.296776              | 1.15             | 0.033381              | -1.18            |
| INTS2        | integrator complex subunit 2 isoform X1                                 | 16 45888415 45953085   | 0.013351              | -1.36            | 0.285892              | 1.28             | 0.239377              | 1.20             |
| SNX3         | sorting nexin-3 isoform X2                                              | 4 12137236 12186193    | 0.013351              | -1.38            | 0.492464              | 1.19             | 0.795293              | 1.05             |
| TADA1        | transcriptional adapter 1                                               | 1 24811331 24829759    | 0.013351              | -1.40            | 0.613947              | 1.16             | 0.093960              | 1.31             |
| ARL5A        | ADP-ribosylation factor-like protein 5A                                 | 12 40530617 40555857   | 0.013351              | -1.53            | 0.180865              | 1.49             | 0.869070              | 1.04             |
| HECTD2       | probable E3 ubiquitin-protein ligase HECT domain-containing protein 2   | 9 89941607 90033304    | 0.013351              | -1.71            | 0.779787              | 1.15             | 0.853324              | 1.06             |
| TARM1        | LOW QUALITY PROTEIN: T-cell-interacting protein 1                       | 19 54917835 54932826   | 0.013365              | 5.36             | 0.956172              | 1.13             | 0.971841              | 1.04             |
| C1H1orf52    | UPF0690 protein C1orf52 homolog                                         | 1 141988954 141995678  | 0.013406              | -1.49            | 0.179340              | 1.46             | 0.493802              | 1.15             |
| LOC102132107 | uncharacterized protein LOC102132107                                    | 9 37897517 37941913    | 0.013410              | -10.39           | 0.668025              | 2.35             | 0.281676              | 3.32             |
| BAZZA        | bromodomain adjacent to zinc finger domain 1                            | 11 55554738 55596316   | 0.013497              | 1.27             | 0.695969              | 1.09             | 0.287784              | 1.14             |
| MTRF1        | mitochondrial ribosomal protein MTRF1                                   | 17 20468477 20515596   | 0.013497              | -1.31            | 0.405680              | 1.18             | 0.442129              | 1.12             |
| MSI1         | RNA-binding protein Musashi homolog 1                                   | 11 124233595 124260763 | 0.013539              | 2.01             | 0.531860              | 1.46             | 0.790881              | -1.11            |
| PHF2         | lysine-specific demethylase PHF2                                        | 15 107712753 107743300 | 0.013539              | 1.30             | 0.583525              | 1.13             | 0.362950              | 1.13             |
| FCMR         | fas apoptotic inhibitory molecule 3 isoform 1                           | 1 65482701 65499650    | 0.013574              | 2.05             | 0.245817              | -1.83            | 0.895624              | 1.06             |
| GJB3         | gap junction beta-3 protein                                             | 1 193140499 193141311  | 0.013574              | -1.73            | 0.736976              | 1.19             | 0.513948              | -1.21            |
| LSM6         | U6 snRNA-associated Sm-like protein LSM6                                | 5 145289817 145297059  | 0.013658              | -1.30            | 0.854152              | 1.05             | 0.842610              | -1.03            |
| PAIP2B       | polyadenylate-binding protein-interacting protein 2B                    | 13 38686531 38718295   | 0.013684              | 1.66             | 0.711897              | 1.19             | 0.389197              | 1.25             |
| LOC102122229 | zinc finger protein 252-like isoform X2                                 | 8 146668655 146708256  | 0.013731              | 1.27             | 0.155379              | 1.28             | 0.063692              | -1.23            |
| LOC102135323 | ryanodine receptor 1-like                                               | 0 2333 4896            | 0.013738              | 2.70             | 0.810543              | -1.32            | 0.942130              | -1.05            |
| LOC102115910 | V-set and immunoglobulin domain-containing protein 1                    | 0 1754 12983           | 0.013738              | 1.51             | 0.821908              | 1.10             | 0.367213              | 1.21             |
| ASPH         | aspartyl/asparaginyl beta-hydroxylase isoform 1                         | 8 62583315 62812272    | 0.013738              | -1.35            | 0.671579              | 1.12             | 0.507636              | 1.11             |
| LOC102141621 | uncharacterized protein LOC102141621                                    | 14 125506412 125525986 | 0.013745              | -3.37            | 0.313180              | -2.27            | 0.871675              | -1.12            |
| LOC107129315 | T-cell receptor beta chain V region CTL-1                               | 3 175616083 175616725  | 0.013773              | -2.18            | 0.385124              | -1.71            | 0.643038              | 1.22             |
| LOC107129939 | uncharacterized protein LOC107129939                                    | 6 60032601 60034665    | 0.013813              | 6.01             | 0.866137              | -1.61            | 0.368758              | -3.42            |
| LOC102143072 | prostaglandin F synthase 1-like                                         | 9 5545897 5570395      | 0.013813              | 3.17             | 0.162303              | 3.29             | 0.027981              | -3.44            |
| MAK          | serine/threonine-protein kinase MAK isoform 1                           | 4 160022492 160088290  | 0.013813              | 2.21             | 0.009468              | 4.08             | 0.270088              | -1.59            |
| SUPT20H      | transcription factor SPT20 homolog isoform 1                            | 17 16408142 16450980   | 0.013813              | -1.15            | 0.716056              | 1.05             | 0.357669              | 1.07             |
| TRNT1        | CCA tRNA nucleotidyltransferase 1, mitochondrial                        | 2 134015359 134038735  | 0.013813              | -1.47            | 0.398113              | 1.29             | 0.390517              | 1.19             |
| HIGD1A       | HIG1 domain family member 1A, mitochondrial                             | 2 97718166 97725915    | 0.013813              | -1.48            | 0.405762              | 1.29             | 0.372870              | 1.20             |
| AP3S1        | AP-3 complex subunit sigma-1 isoform X1                                 | 6 114685835 114755873  | 0.013813              | -1.56            | 0.753040              | 1.14             | 0.614013              | 1.13             |
| BET1         | BET1 homolog                                                            | 3 117972480 117981899  | 0.013813              | -1.67            | 0.325413              | 1.46             | 0.655207              | 1.14             |
| DNAL1I       | axonemal dynein light intermediate polypeptide 1                        | 1 190251761 190260719  | 0.013848              | 2.47             | 0.352499              | -1.91            | 0.128837              | -1.95            |
| PHOSPHO1     | phosphoethanolamine/phosphocholine phosphatase                          | 16 34599765 34602203   | 0.013848              | 2.10             | 0.186453              | 2.10             | 0.654537              | 1.22             |
| GLT1D1       | glycosyltransferase 1 domain-containing protein 1                       | 11 133230757 133353105 | 0.013888              | 1.97             | 0.189849              | -1.90            | 0.315566              | 1.43             |
| ZMYND10      | zinc finger MYND domain-containing protein 10                           | 2 105590085 105594254  | 0.014011              | 2.83             | 0.895774              | 1.17             | 0.115637              | -2.24            |
| NR4A2        | nuclear receptor subfamily 4 group A member 2                           | 12 45089746 45094119   | 0.014011              | 1.61             | 0.742766              | 1.16             | 0.497314              | -1.18            |
| CNT2         | cyclin-T2 isoform X1                                                    | 12 21263950 21299479   | 0.014011              | -1.45            | 0.574687              | 1.19             | 0.823804              | 1.05             |
| EIF2AK2      | interferon-induced, double-stranded RNA-dependent protein kinase 2      | 13 73537200 73583304   | 0.014011              | -1.49            | 0.133778              | 1.52             | 0.217173              | 1.28             |
| STX5         | syntaxin-5                                                              | 14 11429167 11455395   | 0.014034              | 1.20             | 0.356989              | -1.14            | 0.410944              | -1.08            |
| HS3ST1       | heparan sulfate glucosamine 3-O-sulfotransferase 1                      | 5 10507613 10508536    | 0.014039              | 1.90             | 0.749415              | -1.22            | 0.815426              | 1.09             |
| LOC102124849 | choline transporter-like protein 2                                      | 0 1802 2412            | 0.014082              | 1.78             | 0.768384              | 1.18             | 0.496770              | 1.23             |
| OSBPL5       | oxysterol-binding protein-related protein 5                             | 14 3048109 3094322     | 0.014116              | 1.67             | 0.339645              | 1.45             | 0.969224              | -1.01            |
| REEP3        | receptor expression-enhancing protein 3 isoform 1                       | 9 72406768 72509051    | 0.014189              | -1.50            | 0.031991              | 1.74             | 0.423065              | 1.19             |
| FAM160B1     | protein FAM160B1 isoform X1                                             | 9 114025998 114069414  | 0.014284              | -1.51            | 0.130059              | 1.54             | 0.358387              | 1.22             |
| LOC102132836 | prothymosin alpha-like                                                  | 8 59653688 59654017    | 0.014284              | -1.54            | 0.965864              | 1.02             | 0.000238              | -1.93            |
| TRAF5        | TNF receptor-associated factor 5 isoform 1                              | 1 69897614 69943263    | 0.014288              | 1.40             | 0.876217              | 1.06             | 0.222760              | 1.22             |
| ZNF776       | zinc finger protein 776 isoform X1                                      | 19 58404434 58412937   | 0.014288              | 1.35             | 0.648439              | -1.13            | 0.404786              | 1.14             |
| LOC102137378 | LOW QUALITY PROTEIN: acyl-coenzyme A oxidase                            | 13 14895671 14929259   | 0.014294              | 2.24             | 0.449753              | 1.65             | 0.169103              | 1.61             |
| ERMAP        | erythroid membrane-associated protein isoform 1                         | 1 184833935 184847938  | 0.014347              | 5.34             | 0.639095              | 2.02             | 0.353176              | -2.23            |
| CD177        | CD177 antigen                                                           | 19 44124297 44138912   | 0.014347              | 2.88             | 0.203914              | 2.64             | 0.736379              | -1.23            |
| MGRN1        | E3 ubiquitin-protein ligase MGRN1 isoform 1                             | 20 4895316 4956827     | 0.014347              | 1.34             | 0.655469              | -1.13            | 0.645272              | 1.08             |
| TOMM5        | mitochondrial import receptor subunit TOM5                              | 15 41395368 41399120   | 0.014347              | -1.42            | 0.927397              | -1.04            | 0.713543              | 1.08             |
| RCN2         | reticulon 2                                                             | 7 55232337 55250825    | 0.014347              | -1.57            | 0.404879              | 1.34             | 0.341441              | 1.25             |
| TPCN2        | two pore calcium channel protein 2 isoform 1                            | 14 5673004 5709439     | 0.014353              | -1.41            | 0.389255              | -1.26            | 0.024284              | -1.42            |
| ANAPC10      | anaphase-promoting complex subunit 10 isoform 1                         | 5 144115793 144229149  | 0.014383              | -1.24            | 0.768384              | 1.06             | 0.933007              | -1.01            |
| ATP12A       | potassium-transporting ATPase alpha chain 2                             | 17 4694009 4725107     | 0.014406              | 3.35             | 0.159971              | -3.31            | 0.260408              | -2.00            |
| ST3GAL1      | CMP-N-acetylneuraminate-beta-galactosyltransferase 1                    | 8 134836487 134860607  | 0.014421              | 1.33             | 0.706665              | -1.10            | 0.707335              | -1.06            |

| Gene symbol  | Gene name                                                        | chr_start_end          | Day3 adjusted P-value | Day3 fold change | Day5 adjusted P-value | Day5 fold change | Day7 adjusted P-value | Day7 fold change |
|--------------|------------------------------------------------------------------|------------------------|-----------------------|------------------|-----------------------|------------------|-----------------------|------------------|
| SDCBP        | syntenin-1 isoform X1                                            | 8 59681190 59698685    | 0.014452              | -1.76            | 0.606231              | 1.28             | 0.903989              | 1.04             |
| RTF1         | RNA polymerase-associated protein RTF1                           | 7 18312988 18384755    | 0.014467              | 1.13             | 0.636293              | -1.05            | 0.368302              | 1.06             |
| OAS1         | 2'-5'-oligoadenylate synthase 1                                  | 11 116640337 116652987 | 0.014497              | -2.44            | 0.170938              | 2.38             | 0.590413              | 1.30             |
| SPATA17      | spermatogenesis-associated protein 17 isoform X1                 | 1 76279915 76509688    | 0.014520              | 3.35             | 0.768581              | 1.47             | 0.485346              | -1.60            |
| GIN1         | gypsy retrotransposon integrase-like protein                     | 6 101639729 101660347  | 0.014543              | -1.36            | 0.692200              | -1.12            | 0.878823              | -1.03            |
| FA2H         | fatty acid 2-hydroxylase                                         | 20 62850353 62912885   | 0.014601              | -2.01            | 0.578667              | 1.41             | 0.811494              | -1.11            |
| SLC1A3       | excitatory amino acid transporter 1                              | 6 37035006 37117503    | 0.014601              | -2.10            | 0.976880              | -1.03            | 0.602953              | 1.24             |
| LOC107128656 |                                                                  | 0 196804 213967        | 0.014624              | -1.85            | 0.230680              | 1.71             | 0.091762              | 1.63             |
| LRPAP1       | alpha-2-macroglobulin receptor-associated protein 1              | 5 3627302 3647053      | 0.014688              | 1.28             | 0.221947              | -1.24            | 0.708881              | -1.23            |
| GSKIP        | GSK3-beta interaction protein isoform X1                         | 7 161471828 161475308  | 0.014690              | -1.71            | 0.492502              | 1.35             | 0.431722              | 1.25             |
| PLA2G2F      | group IIF secretory phospholipase A2                             | 1 208269543 208278519  | 0.014731              | -2.21            | 0.406342              | -1.67            | 0.286611              | -1.55            |
| EIF1AX       | eukaryotic translation initiation factor 1A                      | X 18029044 18043674    | 0.014750              | -1.57            | 0.109805              | 1.64             | 0.548812              | 1.16             |
| TUSC3        | tumor suppressor candidate 3 isoform X2                          | 8 15500694 15706557    | 0.014767              | -1.57            | 0.700508              | -1.17            | 0.762195              | 1.08             |
| QRICH2       | glutamine-rich protein 2                                         | 16 73628308 73670255   | 0.014843              | -4.68            | 0.989305              | 1.03             | 0.588391              | 1.60             |
| LOC102126660 | Ig heavy chain V-I region V35-like                               | 0 451845 452293        | 0.014889              | 3.79             | 0.690790              | 1.62             | 0.923476              | 1.08             |
| ZNF701       | zinc finger protein 701                                          | 19 53253865 53263547   | 0.014921              | -1.34            | 0.901660              | 1.04             | 0.325693              | 1.16             |
| UBL3         | ubiquitin-like protein 3                                         | 17 9390481 9464953     | 0.014927              | -1.40            | 0.008328              | 1.71             | 0.918073              | 1.02             |
| DNAH12       | dynein heavy chain 12, axonemal isoform X1                       | 2 112619385 112855118  | 0.014971              | 2.53             | 0.987179              | -1.02            | 0.191375              | -1.86            |
| NFIX         | nuclear factor 1 X-type isoform X4                               | 19 13261295 13325236   | 0.014971              | 1.63             | 0.590300              | -1.25            | 0.158093              | 1.41             |
| PHF11        | PHD finger protein 11 isoform X1                                 | 17 28706828 28734192   | 0.014987              | -1.23            | 0.881595              | 1.03             | 0.626811              | 1.06             |
| STXBP4       | syntaxin-binding protein 4 isoform X1                            | 16 40488377 40665518   | 0.014995              | -1.29            | 0.654124              | 1.11             | 0.749645              | -1.05            |
| IgLL5        | immunoglobulin lambda-like polypeptide                           | 10 28422313 28423103   | 0.015014              | 2.81             | 0.939118              | 1.10             | 0.849377              | -1.13            |
| ZER1         | protein zer-1 homolog isoform X1                                 | 15 10410502 10439160   | 0.015099              | 1.34             | 0.468264              | -1.19            | 0.679392              | -1.07            |
| LOC102142464 | maspin-like                                                      | 20 1297243 1300040     | 0.015101              | 10.65            | 0.715092              | -2.10            | 0.046488              | 6.51             |
| PHACTR4      | phosphatase and actin regulator 4 isoform X1                     | 1 19967875 199828194   | 0.015105              | 1.37             | 0.802222              | -1.08            | 0.568628              | 1.11             |
| MKLN1        | muskelin isoform X1                                              | 3 164099209 164257407  | 0.015105              | -1.26            | 0.579805              | -1.12            | 0.691836              | -1.05            |
| FCER1G       | high affinity immunoglobulin epsilon receptor gamma 1            | 1 90432384 90435897    | 0.015105              | -1.64            | 0.744303              | -1.17            | 0.479814              | -1.21            |
| EID2         | EP300-interacting inhibitor of differentiation 2                 | 19 32442 33152         | 0.015106              | -1.43            | 0.790583              | 1.10             | 0.695505              | 1.08             |
| PPIL6        | peptidyl-prolyl cis-trans isomerase-like 6                       | 4 13301157 13349252    | 0.015132              | 1.63             | 0.119876              | 1.69             | 0.339527              | -1.27            |
| SNX31        | sorting nexin-31 isoform X3                                      | 8 101712705 101782518  | 0.015141              | 3.12             | 0.968549              | 1.07             | 0.071023              | -2.64            |
| SRSF10       | serine/arginine-rich splicing factor 10 isoform X1               | 1 204400947 204414191  | 0.015141              | -1.41            | 0.370091              | 1.27             | 0.698932              | 1.08             |
| SPATS1       | spermatogenesis-associated serine-rich protein 1                 | 4 126143254 126178840  | 0.015177              | 5.51             | 1.000000              | 1.00             | 0.580083              | -1.77            |
| RGS2         | regulator of G-protein signaling 2                               | 1 50980408 50982959    | 0.015177              | 1.61             | 0.390165              | 1.38             | 0.879988              | 1.05             |
| AZU1         | azurocidin                                                       | 19 585921 590998       | 0.015212              | -1.94            | 0.134619              | 1.99             | 0.852710              | -1.08            |
| LOC102116898 | Ig kappa chain V-III region VG-like                              | 0 10792 11314          | 0.015256              | 2.26             | 0.118421              | 2.07             | 0.326048              | 1.36             |
| MORC4        | MORC family CW-type zinc finger protein 4                        | X 104064591 104123927  | 0.015260              | 1.45             | 0.857614              | -1.07            | 0.938265              | -1.02            |
| C15H9orf24   | spermatid-specific manchette-related protein 24                  | 15 44735179 44753898   | 0.015312              | 3.56             | 0.967552              | 1.08             | 0.432132              | -1.71            |
| ESY1         | extended synaptotagmin-1 isoform X1                              | 11 55044731 55063131   | 0.015312              | 1.20             | 0.586899              | -1.09            | 0.565608              | 1.06             |
| LOC102118112 | cytochrome c oxidase assembly factor 7-like                      | 0 1405 1960            | 0.015324              | -1.74            | 0.000198              | -3.17            | 0.678032              | 1.14             |
| FAM35A       | protein FAM35A isoform X1                                        | 9 47829216 47869213    | 0.015369              | -1.32            | 0.482478              | 1.18             | 0.396879              | -1.14            |
| CNR2         | cannabinoid receptor 2                                           | 1 204511986 204513068  | 0.015411              | 2.10             | 0.735662              | -1.28            | 0.313997              | 1.51             |
| LOC102138692 |                                                                  | 8 73169689 73271821    | 0.015411              | -2.14            | 0.819464              | -1.20            | 0.607853              | 1.24             |
| NTPCR        | cancer-related nucleoside-triphosphatase                         | 1 16609158 16637441    | 0.015460              | 1.43             | 0.913958              | -1.04            | 0.514117              | -1.13            |
| SSX2IP       | afadin- and alpha-actinin-binding protein 2                      | 1 142583780 142608711  | 0.015505              | -1.40            | 0.854152              | 1.07             | 0.323402              | 1.19             |
| LOC107130135 |                                                                  | 6 181526241 181536809  | 0.015505              | -17.18           | 0.705036              | 2.38             | 0.713879              | -1.62            |
| WSB1         | WD repeat and SOCS box-containing protein 1                      | 16 23493439 23511985   | 0.015646              | -1.50            | 0.854827              | 1.08             | 0.100093              | -1.38            |
| MMP25        | matrix metalloproteinase-25 isoform X1                           | 20 3332407 3345222     | 0.015688              | 1.52             | 0.920988              | -1.05            | 0.164676              | 1.34             |
| TMEM68       | transmembrane protein 68 isoform X2                              | 8 56786776 56811760    | 0.015688              | -1.27            | 0.781775              | 1.07             | 0.489799              | 1.09             |
| TPR          | nucleoprotein TPR isoform X1                                     | 1 44230485 44293646    | 0.015712              | 1.30             | 0.480781              | -1.16            | 0.963130              | -1.01            |
| FAM168A      | protein FAM168A isoform X2                                       | 14 68635784 68699086   | 0.015822              | 1.16             | 0.596937              | -1.07            | 0.027145              | 1.16             |
| LTBP4        | latent-transforming growth factor beta-binding protein 4         | 19 41105962 41141032   | 0.015830              | 2.05             | 0.357703              | 1.67             | 0.810309              | 1.11             |
| PRKAA2       | 5'-AMP-activated protein kinase catalytic subunit alpha-2        | 1 170652923 170684421  | 0.015870              | -1.80            | 0.070742              | 2.11             | 0.145867              | 1.55             |
| UBTF         | nucleolar transcription factor 1 isoform X1                      | 16 55987842 55999148   | 0.015885              | 1.25             | 0.974056              | 1.01             | 0.168109              | 1.17             |
| MYF6         | myogenic factor 6                                                | 11 79874685 79875935   | 0.015928              | 5.20             | 0.213476              | 5.61             | 0.288989              | -2.32            |
| ARHGAP31     | rho GTPase-activating protein 31 isoform X1                      | 2 152782021 152902892  | 0.015928              | 1.42             | 0.444023              | 1.24             | 0.334312              | 1.19             |
| HDAC1        | histone deacetylase 1 isoform X1                                 | 1 195651888 195701378  | 0.015928              | 1.13             | 0.575815              | -1.06            | 0.471239              | -1.05            |
| LGALS1       | galactin-1                                                       | 10 13573244 13576877   | 0.015928              | -1.51            | 0.846842              | -1.09            | 0.719026              | -1.09            |
| LOC102131515 | leucine-rich repeat protein 1                                    | 7 29937 35975          | 0.015928              | -1.59            | 0.772415              | -1.15            | 0.949274              | 1.02             |
| CD300LG      | CMRF35-like molecule 9 isoform X5                                | 16 55548796 55565767   | 0.015928              | -3.99            | 0.829941              | 1.36             | 0.710207              | -1.34            |
| WHSC1L1      | histone-lysine N-methyltransferase NSD3                          | 8 39092263 39166738    | 0.015972              | 1.21             | 0.803911              | -1.05            | 0.720744              | 1.04             |
| SYPL1        | synaptophysin-like protein 1                                     | 3 138545830 138567172  | 0.015978              | -1.66            | 0.403479              | 1.40             | 0.771011              | 1.09             |
| NLRP6        | NACHT, LRR and PYD domains-containing protein 6                  | 14 95346 101836        | 0.016028              | 2.26             | 0.792894              | -1.24            | 0.395678              | 1.45             |
| L1CAM        | neural cell adhesion molecule L1 isoform X1                      | X 150843479 150856758  | 0.016031              | 2.14             | 0.054813              | 2.64             | 0.488596              | 1.33             |
| KDM4B        | lysine-specific demethylase 4B isoform X1                        | 19 5156398 5272461     | 0.016108              | 1.22             | 0.323183              | -1.16            | 0.638666              | 1.05             |
| RFESD        | Rieske domain-containing protein                                 | 6 94075179 94077463    | 0.016142              | -1.57            | 0.795938              | -1.12            | 0.341441              | 1.26             |
| LOC102135595 | LOW QUALITY PROTEIN: neuroblastoma                               | 1 104117964 104137244  | 0.016142              | -1.75            | 0.712096              | 1.21             | 0.000013              | -2.43            |
| LOC102124370 | perilipin-2 isoform X1                                           | 15 59645205 59669454   | 0.016160              | -2.56            | 0.987179              | 1.02             | 0.997204              | -1.00            |
| GSPT2        | eukaryotic peptide chain release factor GTPase 2                 | 0 31121 32995          | 0.016190              | -1.32            | 0.982070              | 1.01             | 0.003766              | 1.42             |
| LOC102125538 |                                                                  | 15 26545276 26570275   | 0.016190              | -2.15            | 0.360958              | -1.73            | 0.125047              | -1.82            |
| LOC102134537 | tight junction protein ZO-3-like                                 | 19 3709179 3723579     | 0.016315              | 1.78             | 0.271093              | -1.60            | 0.879204              | -1.06            |
| OSCP1        | protein OSCP1 isoform X1                                         | 1 191377358 191409002  | 0.016315              | 1.63             | 0.404810              | -1.39            | 0.236553              | -1.35            |
| ANK3         | ankyrin-3 isoform X25                                            | 9 75341680 76032041    | 0.016315              | 1.60             | 0.999141              | 1.00             | 0.845059              | -1.06            |
| TMEM229B     | transmembrane protein 229B                                       | 7 131995031 131995534  | 0.016315              | 1.47             | 0.604382              | 1.20             | 0.194178              | 1.29             |
| LOC102123757 | zinc finger protein 680                                          | 3 58320559 58366724    | 0.016315              | -1.41            | 0.927196              | 1.04             | 0.484394              | 1.14             |
| PCDHGB1      | protocadherin gamma-B1                                           | 6 140472157 140474589  | 0.016328              | 2.47             | 0.181454              | 2.69             | 0.109359              | 2.08             |
| PLPP3        | lipid phosphate phosphohydrolase 3 isoform X1                    | 1 170797338 170891460  | 0.016338              | 1.76             | 0.318215              | 1.55             | 0.974592              | -1.01            |
| DNAAF3       | DNAAF3                                                           | 19 55974044 55983401   | 0.016351              | 2.61             | 0.619033              | -1.55            | 0.342291              | -1.63            |
| CA8          | carbonic anhydrase-related protein 8                             | 8 61320107 61393245    | 0.016351              | 1.70             | 0.000556              | 2.87             | 0.826347              | -1.07            |
| SNRPG        | small nuclear ribonucleoprotein G isoform X1                     | 13 39607642 39619755   | 0.016351              | -1.33            | 0.505872              | -1.17            | 0.581512              | -1.09            |
| CMPK1        | UMP-CMP kinase isoform X1                                        | 1 180216533 180260048  | 0.016351              | -1.49            | 0.375878              | 1.32             | 0.682838              | 1.10             |
| ATP8A1       | phospholipid-transporting ATPase 1A isoform X1                   | 5 42199831 42461723    | 0.016351              | -1.58            | 0.596308              | 1.23             | 0.635833              | 1.13             |
| C14H11orf70  | uncharacterized protein C11orf70 homolog                         | 14 97970075 98006106   | 0.016390              | 5.90             | 0.879242              | 1.37             | 0.759738              | 1.37             |
| ZCCHC10      | zinc finger CCHC domain-containing protein 10                    | 6 131986733 132016794  | 0.016419              | -1.45            | 0.064481              | 1.59             | 0.827389              | 1.05             |
| LOC107130072 | uncharacterized protein LOC107130072                             | 6 133712687 133713178  | 0.016419              | -2.58            | 0.740350              | 1.33             | 0.853864              | 1.12             |
| CFAP74       | LOW QUALITY PROTEIN: cilium- and flagellum-associated protein 74 | 1 226436956 226500755  | 0.016473              | 3.06             | 0.951046              | -1.10            | 0.567020              | -1.45            |
| LRRK1        | leucine-rich repeat serine/threonine-protein kinase 1            | 7 81893334 82040522    | 0.016473              | 1.16             | 0.584150              | -1.07            | 0.210026              | 1.10             |
| CCDC58       | coiled-coil domain-containing protein 58                         | 2 149801999 149825757  | 0.016473              | -1.36            | 0.761411              | -1.10            | 0.973653              | -1.01            |



| Gene symbol  | Gene name                                    | chr_start_end          | Day3 adjusted P-value | Day3 fold change | Day5 adjusted P-value | Day5 fold change | Day7 adjusted P-value | Day7 fold change |
|--------------|----------------------------------------------|------------------------|-----------------------|------------------|-----------------------|------------------|-----------------------|------------------|
| TTPA         | alpha-tocopherol transfer protein            | 8 64172212 64197494    | 0.016473              | -4.26            | 0.642764              | -1.85            | 0.799557              | -1.26            |
| PAK1IP1      | p21-activated protein kinase-interacting p   | 4 160152824 160166291  | 0.016488              | -1.41            | 0.059077              | 1.56             | 0.305584              | 1.02             |
| KIF6         | kinesin-like protein KIF6 isoform X4         | 4 130979247 131374267  | 0.016516              | 3.35             | 0.218195              | 3.09             | 0.673150              | -1.33            |
| SYT15        | synaptotagmin-15 isoform X1                  | 9 47893822 47902697    | 0.016520              | 1.53             | 0.249204              | -1.44            | 0.487208              | 1.17             |
| TMED7        | transmembrane emp24 domain-containing        | 6 114452981 114460892  | 0.016541              | -2.19            | 0.099882              | 2.44             | 0.583858              | 1.27             |
| SETDB2       | histone-lysine N-methyltransferase SETD      | 17 28657076 28702683   | 0.016572              | -1.31            | 0.541797              | -1.15            | 0.629069              | -1.08            |
| ARL8B        | ADP-ribosylation factor-like protein 8B      | 2 136007019 136058924  | 0.016578              | -1.51            | 0.778065              | 1.12             | 0.583858              | 1.13             |
| LOC107129331 | T-cell receptor beta chain V region YT35     | 3 175900449 175901245  | 0.016632              | 2.22             | 0.008838              | -2.87            | 0.995145              | -1.00            |
| SLC18A2      | synaptic vesicular amine transporter         | 9 116450557 116488438  | 0.016671              | 3.63             | 0.986424              | -1.03            | 0.134178              | 2.54             |
| XPNPEP2      | xxa-Pro aminopeptidase 2                     | X 126620059 126649642  | 0.016674              | 1.76             | 0.078378              | -1.99            | 0.074448              | 1.62             |
| ZNF512B      | zinc finger protein 512B                     | 10 96172631 96178596   | 0.016674              | 1.27             | 0.989455              | -1.00            | 0.802997              | -1.04            |
| CFAP221      | cilia- and flagella-associated protein 221 i | 12 12530404 12641468   | 0.016683              | 1.60             | 0.999575              | -1.00            | 0.031956              | -1.61            |
| MAOB         | amine oxidase [flavin-containing] B isofo    | X 42049696 42173440    | 0.016683              | 1.44             | 0.802412              | -1.10            | 0.208469              | -1.27            |
| ATP10A       | probable phospholipid-transporting ATPa      | 7 3657796 3841029      | 0.016683              | 1.40             | 0.017946              | 1.67             | 0.848190              | 1.04             |
| MANSC1       | MANSC domain-containing protein 1 iso        | 11 12899076 12913170   | 0.016683              | 1.31             | 0.987462              | 1.01             | 0.026628              | 1.32             |
| C14H11orf71  | uncharacterized protein C11orf71 homolo      | 14 110430316 110430699 | 0.016683              | -1.40            | 0.858569              | 1.07             | 0.663975              | 1.09             |
| PHIP         | PH-interacting protein isoform X4            | 4 94823132 94955680    | 0.016683              | -1.61            | 0.460404              | 1.33             | 0.425769              | 1.23             |
| C12H2orf69   | UPF0565 protein C2orf69 homolog              | 12 89113319 89126992   | 0.016706              | -1.97            | 0.247857              | 1.80             | 0.374385              | 1.38             |
| PMS1         | PMS1 protein homolog 1 isoform X1            | 12 78961246 79048511   | 0.016856              | -1.39            | 0.224150              | 1.34             | 0.393838              | 1.16             |
| FUCA2        | plasma alpha-L-fucosidase isoform X1         | 4 48022668 48038550    | 0.016867              | -1.47            | 0.579401              | -1.20            | 0.660406              | -1.10            |
| ARHGEF9      | rho guanine nucleotide exchange factor 9     | X 60410623 60562186    | 0.016892              | 1.55             | 0.155597              | 1.56             | 0.796708              | -1.07            |
| LOC102135321 | Ig kappa chain V-II region GM607-like        | 13 17866925 17868243   | 0.016932              | -13.27           | 0.988609              | -1.06            | 0.096876              | -6.35            |
| SUPT6H       | transcription elongation factor SPT6         | 16 24921969 24949011   | 0.016950              | 1.25             | 0.974541              | -1.01            | 0.969193              | -1.01            |
| ATP5G3       | ATP synthase, H+ transporting, mitochon      | 12 64150529 64153486   | 0.016982              | -1.29            | 0.985600              | -1.01            | 0.984845              | 1.00             |
| LOC102117770 | Ig kappa chain V-III region NG9-like         | 7 85884637 85885485    | 0.016986              | 5.87             | 0.055752              | -7.28            | 0.933717              | 1.09             |
| SPTA1        | spectrin alpha chain, erythrocytic 1         | 1 93011346 93087467    | 0.016986              | 2.95             | 0.030023              | 4.82             | 0.779766              | 1.21             |
| PIP5K1A      | phosphatidylinositol 4-phosphate 5-kinase    | 1 100750469 100804984  | 0.017002              | 1.33             | 0.895774              | -1.04            | 0.742717              | -1.06            |
| CALCB        | calcitonin gene-related peptide 2            | 14 52672362 52674795   | 0.017025              | 7.64             | 0.319906              | 6.98             | 0.165825              | -4.60            |
| LOC102145413 | HLA class II histocompatibility antigen, D   | 4 138024204 138027951  | 0.017025              | 1.90             | 0.103763              | -2.08            | 0.390560              | 1.34             |
| LOC102143577 |                                              | 7 156822277 156839088  | 0.017069              | 1.70             | 0.520208              | -1.34            | 0.297505              | -1.34            |
| IQCK         | IQ domain-containing protein K isoform 2     | 20 19095323 19235207   | 0.017101              | 1.55             | 0.887333              | 1.07             | 0.881578              | -1.04            |
| S100A10      | protein S100-A10 isoform X1                  | 1 99957782 99966930    | 0.017133              | -1.51            | 0.705328              | -1.16            | 0.084933              | -1.41            |
| LYPLA1       | acyl-protein thioesterase 1 isoform X2       | 8 55090225 55143449    | 0.017133              | -1.85            | 0.134806              | 1.93             | 0.504998              | 1.25             |
| FZD10        | frizzled-10                                  | 11 134542675 134544420 | 0.017152              | 1.77             | 0.519830              | 1.33             | 0.296318              | 1.35             |
| ADGRG5       | adhesion G-protein coupled receptor G5       | 20 45587368 45604567   | 0.017269              | 1.65             | 0.681226              | -1.21            | 0.960216              | -1.02            |
| LYPD6        | ly6/PLAUR domain-containing protein 6        | 12 38121599 38154290   | 0.017344              | 2.03             | 0.016230              | 3.03             | 0.807472              | 1.10             |
| ARHGEF3      | rho guanine nucleotide exchange factor 3     | 2 112050365 112355705  | 0.017397              | 1.37             | 0.411140              | 1.23             | 0.298098              | 1.19             |
| CENPK        | centromere protein K isoform X3              | 6 65304751 65362002    | 0.017397              | -1.94            | 0.936036              | -1.01            | 0.514117              | 1.27             |
| LOC107131023 |                                              | 10 27387186 27393365   | 0.017445              | 3.18             | 0.887333              | 1.18             | 0.715942              | -1.24            |
| KLHL36       | kelch-like protein 36                        | 20 72960695 72972300   | 0.017462              | 1.42             | 0.892366              | 1.06             | 0.109643              | 1.32             |
| LOC102121083 |                                              | 10 19380415 19401719   | 0.017537              | -20.53           | 0.149512              | 22.79            | 0.117250              | 10.92            |
| CBX6         | chromobox protein homolog 6 isoform X        | 10 12346617 12353526   | 0.017558              | 1.28             | 0.390165              | -1.18            | 0.330081              | -1.13            |
| AREG         | amphiregulin isoform X1                      | 5 60026718 60033975    | 0.017598              | -2.82            | 0.318130              | -2.22            | 0.291915              | -1.77            |
| FAM103A1     | family with sequence similarity 103, mem     | 7 63020948 63022305    | 0.017696              | -1.24            | 0.709342              | -1.08            | 0.807123              | 1.03             |
| RNF130       | E3 ubiquitin-protein ligase RNF130 isofo     | 6 179916565 180033905  | 0.017696              | -1.37            | 0.385822              | -1.25            | 0.426678              | -1.15            |
| TXND9        | thioredoxin domain-containing protein 9      | 13 3643669 3655123     | 0.017828              | -1.33            | 0.221285              | 1.30             | 0.409716              | 1.13             |
| SH3YL1       | SH3 domain-containing YSC84-like prote       | 13 110947944 110991369 | 0.018027              | -1.43            | 0.989741              | 1.01             | 0.789492              | -1.06            |
| LOC107131038 | Ig lambda chain V region 4A-like             | 10 29190425 29190901   | 0.018057              | 4.44             | 0.470372              | 2.22             | 0.695793              | -1.35            |
| LOC102136965 | zinc finger protein 773 isoform X1           | 19 58140494 58147732   | 0.018057              | 1.59             | 0.543189              | 1.27             | 0.814839              | 1.07             |
| RAC2         | ras-related C3 botulinum toxin substrate 2   | 10 14030963 14048004   | 0.018089              | -1.43            | 0.332915              | -1.31            | 0.118552              | 1.32             |
| SRSF3        | uncharacterized protein LOC101926185         | 4 134138736 134143912  | 0.018089              | -1.40            | 0.277925              | 1.32             | 0.404874              | 1.10             |
| TMX3         | protein disulfide-isomerase TMX3             | 18 11377621 11414082   | 0.018095              | -1.69            | 0.333436              | 1.49             | 0.437127              | 1.25             |
| TMEM251      | transmembrane protein 251                    | 0 4761 6019            | 0.018135              | -1.52            | 0.887441              | 1.07             | 0.806828              | -1.07            |
| PSMG1        | proteasome assembly chaperone 1              | 3 7594694 7602467      | 0.018151              | -1.26            | 0.918867              | 1.03             | 0.975922              | -1.00            |
| SUPV3L1      | ATP-dependent RNA helicase SUPV3L1           | 9 66489665 66519627    | 0.018193              | -1.27            | 0.838695              | -1.06            | 0.271399              | -1.15            |
| SNRPE        | small nuclear ribonucleoprotein E            | 1 62343770 62351723    | 0.018242              | -1.27            | 0.987313              | 1.00             | 0.502621              | 1.09             |
| WNT3A        | protein Wnt-3a                               | 1 86907605 86916625    | 0.018284              | -4.97            | 0.250488              | -4.90            | 0.424711              | -3.06            |
| LRRC23       | leucine-rich repeat-containing protein 23    | 11 7217090 7225012     | 0.018320              | 5.05             | 0.862392              | 1.39             | 0.137330              | -3.50            |
| CCDC103      | coiled-coil domain-containing protein 103    | 16 56709664 56712798   | 0.018433              | 2.33             | 0.213182              | -2.40            | 0.201183              | -1.83            |
| MRPL42       | 39S ribosomal protein L42, mitochondria      | 11 97158700 97192202   | 0.018469              | -1.34            | 0.919141              | 1.04             | 0.448016              | 1.13             |
| TIA1         | TIA1 cytotoxic granule-associated RNA b      | 13 39656250 39691469   | 0.018469              | -1.53            | 0.583264              | 1.23             | 0.959096              | -1.02            |
| LOC107131108 |                                              | 1 102731458 102736596  | 0.018491              | -2.59            | 0.309338              | -2.08            | 0.805761              | 1.14             |
| SSBP3        | single-stranded DNA-binding protein 3 iso    | 1 173002661 173183883  | 0.018517              | 1.29             | 0.397686              | -1.19            | 0.571342              | -1.08            |
| SETD1A       | histone-lysine N-methyltransferase SETD      | 20 29610192 29636002   | 0.018524              | 1.20             | 0.570468              | -1.10            | 0.841237              | -1.02            |
| AFAP1        | actin filament-associated protein 1 isoform  | 5 5005479 5133715      | 0.018558              | 1.39             | 0.879242              | 1.06             | 0.274696              | 1.21             |
| C7H14orf37   | uncharacterized protein C14orf37 homolo      | 7 122260099 122412561  | 0.018659              | 1.59             | 0.755129              | 1.15             | 0.322448              | 1.26             |
| DNMT3A       | DNA (cytosine-5)-methyltransferase 3A iso    | 13 85585213 85668010   | 0.018738              | 1.24             | 0.070565              | -1.31            | 0.757401              | 1.04             |
| SLCO4A1      | solute carrier organic anion transporter fa  | 10 94751868 94780940   | 0.018738              | -2.83            | 0.339723              | -2.20            | 0.894926              | -1.09            |
| LOC107129330 | T-cell receptor beta chain V region CTL-1    | 3 175690218 175690734  | 0.018784              | 9.07             | 0.448294              | -2.99            | 0.533365              | -1.89            |
| ADGRF1       | adhesion G-protein coupled receptor F1       | 4 123521044 123549328  | 0.018791              | 5.27             | 0.565845              | 2.36             | 0.698518              | -1.47            |
| TRRAP        | transformation/transcription domain-asso     | 3 43125833 43258859    | 0.018791              | 1.21             | 0.579401              | -1.10            | 0.764306              | -1.03            |
| HUWE1        | E3 ubiquitin-protein ligase HUWE1 isofo      | X 52605686 52724804    | 0.018887              | 1.22             | 0.551212              | -1.11            | 0.989201              | 1.00             |
| CLIP3        | CAP-Gly domain-containing linker protei      | 19 36504588 36520622   | 0.018940              | 1.85             | 0.358660              | 1.57             | 0.828350              | -1.09            |
| RWDD1        | RWD domain-containing protein 1 isoform      | 4 20596129 20618253    | 0.018983              | -1.20            | 0.724563              | -1.06            | 0.987118              | 1.00             |
| AKIRIN2      | akirin-2                                     | 4 86234487 86262320    | 0.019009              | -1.14            | 0.993669              | 1.00             | 0.624964              | -1.04            |
| ZCCHC24      | zinc finger CCHC domain-containing pro       | 9 56179107 56237067    | 0.019045              | 1.30             | 0.204835              | 1.28             | 0.146441              | 1.21             |
| ACSM5        | acyl-coenzyme A synthetase ACSM5, mit        | 20 19819821 19848308   | 0.019066              | 10.40            | 0.986563              | 1.03             | 0.440137              | 1.91             |
| MMA2HC       | uncharacterized protein LOC101865845         | 12 38243978 38260795   | 0.019123              | -1.24            | 0.870019              | 1.04             | 0.749523              | -1.04            |
| PAXBP1       | PAX3- and PAX7-binding protein 1 isofo       | 3 13980947 14017693    | 0.019209              | -1.50            | 0.735523              | -1.14            | 0.467419              | -1.18            |
| NATD1        | protein NATD1                                | 16 20881761 20892235   | 0.019232              | 1.57             | 0.941586              | -1.04            | 0.998994              | -1.00            |
| IL16         | pro-interleukin-16 isoform X1                | 7 59685948 59815309    | 0.019232              | 1.44             | 0.426392              | -1.27            | 0.326392              | 1.21             |
| PSMG2        | proteasome assembly chaperone 2 isoform      | 18 73626392 73656566   | 0.019232              | -1.27            | 0.691084              | 1.10             | 0.849149              | 1.03             |
| USP45        | ubiquitin carboxyl-terminal hydrolase 45     | 4 74297526 74374047    | 0.019232              | -1.38            | 0.642529              | 1.15             | 0.704480              | 1.07             |
| SPRED1       | sprouty-related, EVH1 domain-containing      | 7 15018090 15115712    | 0.019232              | -1.54            | 0.108439              | 1.63             | 0.643076              | 1.12             |
| LOC102120205 | cytochrome c                                 | 3 95660154 95660471    | 0.019232              | -1.85            | 0.097252              | 2.05             | 0.615157              | 1.19             |
| ZC2HC1A      | zinc finger C2HC domain-containing prot      | 8 79821326 79872375    | 0.019232              | -1.90            | 0.193888              | 1.87             | 0.281333              | 1.45             |
| NKAPL        | NKAP-like protein                            | 4 142588502 142589719  | 0.019232              | -3.84            | 0.783474              | 1.41             | 0.316536              | 1.99             |

| Gene symbol  | Gene name                                                                                      | chr_start_end          | Day3 adjusted P-value | Day3 fold change | Day5 adjusted P-value | Day5 fold change | Day7 adjusted P-value | Day7 fold change |
|--------------|------------------------------------------------------------------------------------------------|------------------------|-----------------------|------------------|-----------------------|------------------|-----------------------|------------------|
| RAB11FIP4    | rab11 family-interacting protein 4 isoform cilia- and flagella-associated protein 44 isoform 2 | 16 27622597 27725362   | 0.019311              | 1.49             | 0.131806              | -1.55            | 0.990927              | 1.00             |
| CFAP44       | cilia- and flagella-associated protein 44 isoform 2                                            | 2 158825209 158961932  | 0.019319              | 2.34             | 0.967949              | 1.05             | 0.169755              | -1.84            |
| LOC102142263 | C4b-binding protein alpha chain isoform 1                                                      | 1 65691556 65723131    | 0.019443              | 1.74             | 0.992155              | 1.01             | 0.246853              | -1.40            |
| CD58         | lymphocyte function-associated antigen 3                                                       | 1 110193057 110249103  | 0.019449              | -1.24            | 0.893034              | -1.03            | 0.911577              | -1.02            |
| LOC102133876 | 9 14152999 14161808                                                                            | 0.019508               | 2.72                  | 0.966449         | -1.06                 | 0.469078         | -1.50                 |                  |
| SPAG17       | sperm-associated antigen 17 isoform X1                                                         | 1 108554933 108775169  | 0.019513              | 5.24             | 0.797827              | 1.64             | 0.807581              | -1.29            |
| HSF2BP       | heat shock factor 2-binding protein isoform 3                                                  | 3 3125101 3240101      | 0.019536              | -1.88            | 0.337761              | 1.60             | 0.384452              | 1.32             |
| PLCH2        | 1-phosphatidylinositol 4,5-bisphosphate phospholipase C                                        | 1 225880231 225908538  | 0.019581              | 6.62             | 0.681257              | -2.67            | 0.431010              | -2.53            |
| PLEKHS1      | pleckstrin homology domain-containing family class B member 1                                  | 9 112927639 112954964  | 0.019581              | 6.31             | 0.726457              | -2.01            | 0.315129              | -2.86            |
| C7H14orf19   | uncharacterized protein C14orf19 homolog 1                                                     | 7 86806174 86806596    | 0.019581              | -1.17            | 0.240083              | -1.16            | 0.806210              | -1.03            |
| MRPL32       | 39S ribosomal protein L32, mitochondria                                                        | 3 77533035 77538161    | 0.019581              | -1.22            | 0.990669              | -1.00            | 0.139424              | -1.16            |
| PAX5         | paired box protein Pax-5 isoform X3                                                            | 15 41974574 42167771   | 0.019586              | 2.61             | 0.407848              | -2.02            | 0.567036              | 1.38             |
| RELN         | reelin isoform X2                                                                              | 3 135850591 136356916  | 0.019586              | 1.81             | 0.726964              | 1.22             | 0.297738              | 1.39             |
| ITGA7        | integrin alpha-7 isoform X4                                                                    | 11 54579364 54604978   | 0.019586              | 1.57             | 0.752777              | 1.15             | 0.889398              | 1.04             |
| CYP2A23      | cytochrome P450 2A13-like precursor                                                            | 19 41522893 41530577   | 0.019619              | 4.43             | 0.141470              | -5.33            | 0.109025              | -3.38            |
| LOC102121984 | CD209 antigen isoform X4                                                                       | 19 8094515 8098929     | 0.019678              | 2.73             | 0.516953              | 1.77             | 0.007102              | 3.53             |
| CRIP1        | cysteine-rich PDZ-binding protein                                                              | 13 63758761 63765561   | 0.019678              | -1.47            | 0.468966              | 1.26             | 0.552928              | 1.14             |
| PADI3        | protein-arginine deiminase type-3                                                              | 1 211226120 211263218  | 0.019708              | 3.44             | 0.972166              | -1.07            | 0.474043              | 1.94             |
| MMP21        | matrix metalloproteinase-21                                                                    | 9 125089567 125099019  | 0.019713              | 1.83             | 0.948945              | 1.05             | 0.087650              | -1.65            |
| LOC102119103 | Ig heavy chain V-I region V35-like                                                             | 0 38285 38732          | 0.019774              | 3.74             | 0.615853              | -1.74            | 0.567020              | 1.47             |
| TMEM164      | transmembrane protein 164 isoform X1                                                           | X 107129562 107303939  | 0.019850              | 1.24             | 0.150797              | -1.25            | 0.970701              | 1.01             |
| PGPEP1       | pyroglutamyl-peptidase 1 isoform X2                                                            | 19 18770327 18792669   | 0.019850              | -1.63            | 0.617955              | -1.24            | 0.745926              | -1.10            |
| SLC7A4       | cationic amino acid transporter 4                                                              | 10 30622107 30625166   | 0.019925              | 7.17             | 0.472843              | 3.30             | 0.941004              | -1.11            |
| LOC107126365 | dynein heavy chain 10, axonemal isoform 1                                                      | 11 128132635 128279814 | 0.019925              | 5.30             | 0.294768              | -4.34            | 0.370135              | -2.28            |
| LOC107128203 | histone-lysine N-methyltransferase 2B-like 1                                                   | 19 36169432 36170751   | 0.019925              | 1.63             | 0.807838              | -1.14            | 0.286710              | 1.32             |
| ZNF70        | zinc finger protein 70                                                                         | 0 176668 178008        | 0.019925              | 1.62             | 0.910687              | -1.06            | 0.969129              | 1.01             |
| STYX         | serine/threonine/tyrosine-interacting protein 1                                                | 7 116896764 116944692  | 0.019925              | -1.77            | 0.435372              | 1.45             | 0.658838              | 1.16             |
| CHST4        | carbohydrate sulfotransferase 4 isoform X1                                                     | 20 61092099 61093265   | 0.020078              | 3.48             | 0.136482              | 4.41             | 0.583146              | -1.46            |
| TWSG1        | uncharacterized protein LOC101926712                                                           | 18 70489657 70554431   | 0.020080              | -1.64            | 0.108439              | 1.77             | 0.114701              | 1.49             |
| IGFBP5       | uncharacterized protein LOC101926781                                                           | 12 106291805 106307096 | 0.020268              | 1.94             | 0.145372              | 2.03             | 0.859666              | 1.08             |
| MEF2D        | myocyte-specific enhancer factor 2D isoform 1                                                  | 1 95234418 95251073    | 0.020268              | 1.14             | 0.327647              | -1.11            | 0.568175              | 1.04             |
| LRRK2        | leucine-rich repeat serine/threonine-protein kinase 2                                          | 11 38656470 38813819   | 0.020344              | -1.48            | 0.574553              | 1.22             | 0.962277              | 1.01             |
| KRCC1        | lysine-rich coiled-coil protein 1                                                              | 13 20390709 20391488   | 0.020434              | -1.26            | 0.328141              | 1.20             | 0.618434              | 1.07             |
| RBM39        | RNA-binding protein 39                                                                         | 10 67191576 67225746   | 0.020434              | -1.34            | 0.390165              | 1.22             | 0.912931              | -1.02            |
| LOC102128307 | 7 26563 30105                                                                                  | 0.020434               | -6.75                 | 0.077817         | -9.64                 | 0.138139         | 4.02                  |                  |
| LOC102140528 | general transcription factor II-I repeat domain 1                                              | 0 15323 78763          | 0.020486              | 1.52             | 0.741584              | -1.15            | 0.722768              | -1.09            |
| SNRNP48      | U11/U12 small nuclear ribonucleoprotein A                                                      | 4 163356392 163375169  | 0.020504              | -1.53            | 0.619138              | 1.21             | 0.980460              | 1.01             |
| CFAP126      | protein Flattop                                                                                | 1 90284097 90287012    | 0.020536              | 6.88             | 0.944153              | 1.20             | 0.584277              | -1.86            |
| C11H12orf65  | probable peptide chain release factor C12orf65                                                 | 11 127543660 127544028 | 0.020555              | 1.45             | 0.881971              | -1.07            | 0.592005              | 1.13             |
| LOC107126825 | 1 117980573 117988568                                                                          | 0.020656               | -2.00                 | 0.287551         | 1.80                  | 0.323063         | -1.44                 |                  |
| CTDSP2       | uncharacterized protein LOC101865557                                                           | 11 56820905 56843462   | 0.020804              | 1.30             | 0.819070              | -1.07            | 0.395025              | 1.13             |
| SBF1         | myotubularin-related protein 5 isoform X1                                                      | 10 335558 388484       | 0.020804              | 1.24             | 0.031590              | -1.36            | 0.857344              | 1.02             |
| LOC107128895 | 2 86236638 86365727                                                                            | 0.020805               | 3.93                  | 0.959668         | -1.10                 | 0.996593         | -1.00                 |                  |
| ERII         | 3'-5' exoribonuclease 1 isoform X3                                                             | 8 11564899 11703173    | 0.020807              | -1.38            | 0.619074              | 1.16             | 0.824848              | 1.05             |
| SRD5A1       | 3-oxo-5-alpha-steroid 4-dehydrogenase 1                                                        | 6 6650831 6687097      | 0.020833              | -1.52            | 0.954701              | -1.03            | 0.838629              | -1.05            |
| MEOX1        | homeobox protein MOX-1 isoform X2                                                              | 16 55331903 55352635   | 0.020837              | 5.05             | 0.692200              | -1.94            | 0.678511              | 1.46             |
| RYR3         | ryanodine receptor 3 isoform X1                                                                | 7 9937716 10503930     | 0.020837              | 3.35             | 0.072911              | -4.04            | 0.711095              | -1.25            |
| LOC107128139 | dedicator of cytokinesis protein 6-like 1                                                      | 19 11577658 11598110   | 0.020837              | 1.59             | 0.299469              | 1.47             | 0.351776              | 1.27             |
| BBS1         | uncharacterized protein LOC101865807                                                           | 14 7964552 7992682     | 0.020837              | 1.56             | 0.657091              | -1.20            | 0.575194              | 1.16             |
| TRMT61B      | tRNA (adenine58)-N(1)-methyltransferase 6                                                      | 13 81935048 81955574   | 0.020837              | -1.30            | 0.373742              | 1.21             | 0.998748              | 1.00             |
| MGST1        | microsomal glutathione S-transferase 1 isoform 1                                               | 11 17049695 17059752   | 0.020837              | -1.35            | 0.000003              | -2.17            | 0.402496              | -1.15            |
| LOC101925708 | uncharacterized protein LOC101925708                                                           | 13 63766017 63766316   | 0.020837              | -1.46            | 0.471956              | 1.26             | 0.552575              | 1.14             |
| PPP4R2       | serine/threonine-protein phosphatase 4 regulatory subunit 2                                    | 2 128624238 128694657  | 0.020837              | -1.47            | 0.084996              | 1.60             | 0.502658              | 1.16             |
| AZ12         | 5-azacytidine-induced protein 2 isoform X1                                                     | 2 19167564 19188698    | 0.020929              | -1.27            | 0.484022              | 1.15             | 0.918666              | 1.02             |
| C13H2orf70   | UPF0573 protein C2orf70 homolog 1                                                              | 13 84308049 84325460   | 0.021059              | 4.11             | 0.221559              | -4.11            | 0.251099              | -2.42            |
| FANK1        | fibronectin type 3 and ankyrin repeat domain 1                                                 | 9 125220539 125341196  | 0.021059              | 2.88             | 0.492464              | -1.90            | 0.421438              | -1.60            |
| GNPDA1       | glucosamine-6-phosphate isomerase 1 isoform 1                                                  | 6 141153681 141174841  | 0.021059              | -1.50            | 0.430379              | -1.30            | 0.947684              | -1.02            |
| CEP250       | centrosome-associated protein CEP250 isoform 1                                                 | 10 66939871 67010882   | 0.021074              | 1.32             | 0.448005              | -1.19            | 0.424178              | -1.13            |
| RGS12        | regulator of G-protein signaling 12 isoform 1                                                  | 5 3412220 3547820      | 0.021078              | 1.41             | 0.835391              | 1.08             | 0.542522              | -1.13            |
| LOC107128278 | 19 53394535 53400343                                                                           | 0.021083               | -1.38                 | 0.001039         | -1.87                 | 0.120385         | 1.29                  |                  |
| CALML4       | LOW QUALITY PROTEIN: calmodulin-binding protein 4                                              | 7 45897617 45909317    | 0.021135              | 2.10             | 0.821157              | 1.20             | 0.883777              | -1.07            |
| TMEM88       | transmembrane protein 88                                                                       | 16 7961614 7962253     | 0.021135              | 1.81             | 0.778436              | 1.19             | 0.410824              | -1.31            |
| UBQLN4       | ubiquilin-4                                                                                    | 1 95687247 95700357    | 0.021186              | 1.36             | 0.535716              | -1.18            | 0.136268              | -1.26            |
| MTMR6        | myotubularin-related protein 6 isoform X1                                                      | 17 5229296 52297645    | 0.021186              | -1.42            | 0.240493              | 1.37             | 0.289956              | 1.22             |
| LOC102116757 | eukaryotic translation initiation factor 1A, isoform 1                                         | 20 63590456 63590890   | 0.021186              | -2.67            | 0.632998              | -1.52            | 0.665312              | -1.28            |
| LOC102135189 | adenylate cyclase type 9 isoform X2                                                            | 0 40215 42139          | 0.021207              | 1.88             | 0.898156              | -1.10            | 0.914929              | 1.05             |
| PRPSAP1      | uncharacterized protein LOC101926187                                                           | 16 73674268 73726219   | 0.021214              | 1.52             | 0.992863              | -1.00            | 0.177790              | -1.34            |
| OGDH         | 2-oxoglutarate dehydrogenase, mitochondrial                                                    | 3 75808699 75891344    | 0.021214              | 1.26             | 0.969025              | -1.01            | 0.355020              | -1.13            |
| ZC3H12C      | probable ribonuclease ZC3H12C isoform 1                                                        | 14 106084663 106156749 | 0.021214              | -1.61            | 0.392648              | 1.40             | 0.868452              | 1.05             |
| DERA         | deoxyribose-phosphate aldolase                                                                 | 11 16588043 16717496   | 0.021227              | -1.33            | 0.705036              | -1.11            | 0.753008              | 1.06             |
| WDR66        | WD repeat-containing protein 66                                                                | 11 125962491 126042922 | 0.021285              | 1.66             | 0.679770              | 1.23             | 0.397038              | -1.28            |
| CARKD        | ATP-dependent (S)-NAD(P)H-hydrate dehydrogenase 1                                              | 17 93006170 93028908   | 0.021285              | -1.17            | 0.387726              | 1.12             | 0.048336              | -1.16            |
| TSEN15       | tRNA-splicing endonuclease subunit Sen15                                                       | 1 42016098 42037328    | 0.021358              | -1.60            | 0.544134              | 1.29             | 0.239377              | 1.34             |
| TBC1D19      | TBC1 domain family member 19 isoform 1                                                         | 5 25826283 25983100    | 0.021359              | -1.41            | 0.944876              | 1.03             | 0.965046              | 1.01             |
| LOC102125382 | cytochrome P450 2F1-like                                                                       | 0 845 4329             | 0.021414              | 4.37             | 0.475516              | -2.80            | 0.088559              | -3.96            |
| RHOV         | rho-related GTP-binding protein RhoV                                                           | 7 17753285 17754371    | 0.021446              | 3.33             | 0.669641              | -1.66            | 0.478525              | -1.60            |
| CNIH4        | protein cornichon homolog 4 isoform X1                                                         | 1 83003126 83023321    | 0.021558              | -1.35            | 0.833594              | 1.07             | 0.810939              | -1.05            |
| VMP1         | vacuole membrane protein 1 isoform X1                                                          | 16 45290832 45406231   | 0.021563              | -1.81            | 0.724132              | -1.23            | 0.484771              | -1.26            |
| CDC16        | cell division cycle protein 16 homolog isoform 1                                               | 17 96734957 96775687   | 0.021579              | -1.18            | 0.837215              | -1.04            | 0.665045              | -1.04            |
| LOC102134836 | integrin alpha-E-like                                                                          | 0 812 4186             | 0.021606              | 3.08             | 0.522143              | -1.53            | 0.651418              | 1.22             |
| LOC102145427 | dynein assembly factor 3, axonemal-like                                                        | 0 33 1884              | 0.021624              | 4.26             | 0.934798              | -1.16            | 0.439980              | -1.86            |
| UBE2B        | ubiquitin-conjugating enzyme E2B                                                               | 6 133411039 133434077  | 0.021624              | -1.27            | 0.091209              | 1.33             | 0.559500              | -1.08            |
| LOC102125892 | cytochrome c oxidase protein 20 homolog 1                                                      | 1 4584213 4591565      | 0.021637              | -1.37            | 0.839824              | -1.07            | 0.866248              | 1.04             |
| MPZL2        | myelin protein zero-like protein 2                                                             | 14 114238213 114244766 | 0.021637              | -2.15            | 0.979974              | -1.03            | 0.799507              | 1.13             |
| CMTM5        | uncharacterized protein LOC101926334                                                           | 7 87097426 87098628    | 0.021647              | -1.32            | 0.676324              | 1.12             | 0.942333              | 1.01             |
| DMRTB1       | doublesex- and mab-3-related transcription factor 1                                            | 1 173972408 173980437  | 0.021688              | 11.14            | 0.944129              | -1.22            | 0.112343              | 6.63             |
| MAP2K1       | dual specificity mitogen-activated protein kinase 1                                            | 7 43977434 44090285    | 0.021688              | -1.45            | 0.858929              | -1.08            | 0.698650              | 1.09             |

| Gene symbol  | Gene name                                   | chr_start_end          | Day3 adjusted P-value | Day3 fold change | Day5 adjusted P-value | Day5 fold change | Day7 adjusted P-value | Day7 fold change |
|--------------|---------------------------------------------|------------------------|-----------------------|------------------|-----------------------|------------------|-----------------------|------------------|
| LOC107127129 | uncharacterized protein LOC107127129        | 13 64096348 64102005   | 0.021695              | 3.60             | 0.712289              | 1.61             | 0.858369              | 1.15             |
| RRN3         | RNA polymerase I-specific transcription i   | 20 15212517 15249123   | 0.021750              | -1.31            | 0.014126              | 1.54             | 0.994885              | -1.00            |
| TMEM55A      | type 2 phosphatidylinositol 4,5-bisphosph   | 8 92163167 92208997    | 0.021750              | -1.71            | 0.525154              | 1.34             | 0.265739              | 1.39             |
| LOC107130357 | T-cell receptor alpha chain V region CTL    | 7 85856128 85856750    | 0.021810              | 7.37             | 0.894634              | -1.33            | 0.782877              | -1.25            |
| LOC107128415 |                                             | 20 68041723 68219467   | 0.021810              | 1.82             | 0.028251              | 2.40             | 0.981005              | -1.01            |
| ZNF740       | zinc finger protein 740 isoform X1          | 11 52036232 52043381   | 0.021810              | 1.30             | 0.738857              | -1.09            | 0.989702              | 1.00             |
| EID2B        | EP300-interacting inhibitor of differentiat | 19 45691 461176        | 0.021810              | -1.27            | 0.776346              | -1.07            | 0.445118              | 1.11             |
| RPL39L       | 60S ribosomal protein L39-like isoform X    | 2 10328690 10341289    | 0.021840              | -2.30            | 0.072911              | 3.09             | 0.765504              | 1.15             |
| LOC107128712 | Ig lambda chain V-IV region Hil-like        | 0 569 1218             | 0.021899              | 3.38             | 0.463875              | 2.13             | 0.840150              | -1.16            |
| MORN1        | MORN repeat-containing protein 1 isoform    | 1 225992954 226062856  | 0.021899              | 1.55             | 0.345872              | -1.38            | 0.105341              | -1.42            |
| MITD1        | MIT domain-containing protein 1             | 13 3461266 3470564     | 0.022030              | -1.28            | 0.683862              | -1.10            | 0.568628              | 1.09             |
| ZNF589       | zinc finger protein 589 isoform X3          | 2 103334942 103360400  | 0.022067              | 1.49             | 0.830975              | 1.10             | 0.635967              | -1.12            |
| FAM111B      | protein FAM111B isoform X1                  | 14 14865995 14885221   | 0.022067              | -2.53            | 0.335955              | -2.06            | 0.217201              | 1.84             |
| SFN          | 14-3-3 protein sigma                        | 1 201420223 201420969  | 0.022067              | -4.44            | 0.912465              | 1.22             | 0.520090              | -1.72            |
| ZNF391       | zinc finger protein 391                     | 4 143435055 143436131  | 0.022172              | 1.57             | 0.885439              | 1.08             | 0.017073              | 1.66             |
| LOC102141944 | LOW QUALITY PROTEIN: SH3 domain             | 11 11429166 11490295   | 0.022197              | -1.40            | 0.535716              | 1.20             | 0.098683              | -1.33            |
| PPIC         | peptidyl-prolyl cis-trans isomerase C       | 6 121962361 121977898  | 0.022255              | -1.30            | 0.017483              | 1.52             | 0.884987              | 1.03             |
| PROK2        | prokineticin-2 isoform X2                   | 2 127381115 127400013  | 0.022301              | 2.60             | 0.746254              | 1.41             | 0.235946              | 1.96             |
| AGBL5        | cytosolic carboxypeptidase-like protein 5   | 13 83806800 83823437   | 0.022323              | 1.43             | 0.459367              | -1.25            | 0.191154              | -1.28            |
| LOC107130356 | T-cell receptor alpha chain V region 2B4-   | 7 85667874 85668532    | 0.022396              | 4.47             | 0.735501              | -1.55            | 0.461719              | 1.66             |
| SMAP1        | stromal membrane-associated protein 1 iso   | 4 103037991 103223062  | 0.022556              | -1.31            | 0.819641              | 1.07             | 0.612599              | 1.08             |
| TTC13        | tetratricopeptide repeat protein 13 isoform | 1 18582667 18687443    | 0.022559              | -1.39            | 0.917525              | -1.04            | 0.472678              | -1.14            |
| RELA         | transcription factor p65 isoform X1         | 14 8821993 8830787     | 0.022636              | 1.20             | 0.984500              | -1.00            | 0.971565              | -1.00            |
| PDSS1        | decaprenyl-diphosphate synthase subunit     | 9 27157355 27208488    | 0.022676              | -1.37            | 0.889423              | -1.05            | 0.518390              | -1.13            |
| LOC102116953 | selenoprotein T                             | 2 52838759 52868446    | 0.022713              | -1.59            | 0.608292              | 1.24             | 0.471549              | 1.21             |
| SLC5A1       | sodium/glucose cotransporter 1              | 10 19256299 19327662   | 0.022741              | 8.49             | 1.000000              | -2.40            | 0.959162              | 1.08             |
| QPRT         | nicotinate-nucleotide pyrophosphorylase [   | 20 28154410 28157061   | 0.022741              | 1.97             | 0.972873              | 1.03             | 0.002715              | 2.46             |
| NDUF4A2      | NADH dehydrogenase [ubiquinone] 1 alp       | 11 56195206 56196725   | 0.022741              | -1.76            | 0.766270              | 1.19             | 0.278798              | -1.39            |
| FAM227A      | protein FAM227A isoform X2                  | 10 12575294 12642273   | 0.022839              | 2.63             | 0.886381              | -1.20            | 0.594361              | -1.35            |
| KDM3B        | lysine-specific demethylase 3B isoform X    | 6 137451704 137533930  | 0.022839              | 1.23             | 0.619325              | -1.10            | 0.344882              | 1.11             |
| C9H10orf128  | putative uncharacterized protein C10orf12   | 9 45859883 45892515    | 0.022852              | 1.44             | 0.953452              | -1.03            | 0.722768              | 1.08             |
| ATP9B        | probable phospholipid-transporting ATPa     | 18 891293 1181333      | 0.022852              | -1.25            | 0.290968              | -1.21            | 0.000700              | -1.39            |
| ZUFSP        | zinc finger with UFM1-specific peptidase    | 4 20660882 20687224    | 0.022852              | -1.53            | 0.892366              | 1.07             | 0.724670              | -1.10            |
| PIH1D2       | PIH1 domain-containing protein 2            | 14 108063244 108069370 | 0.022930              | 1.69             | 0.549650              | -1.32            | 0.850196              | -1.07            |
| TBC1D10C     | carabin isoform X1                          | 14 7043905 7049600     | 0.022951              | 1.39             | 0.505415              | -1.79            | 0.314740              | 1.20             |
| TCTEX1D4     | tctex1 domain-containing protein 4          | 1 182726890 182727555  | 0.023011              | 5.33             | 0.246569              | -9.72            | 0.375443              | -2.54            |
| LOC102120633 | protocadherin gamma-A1 isoform X14          | 6 140452717 140639838  | 0.023011              | 1.29             | 0.068697              | 1.39             | 0.380188              | 1.13             |
| ACSS2        | acetyl-coenzyme A synthetase, cytoplasm     | 10 66306147 66358242   | 0.023011              | 1.21             | 0.651922              | -1.09            | 0.996888              | -1.00            |
| FAM210B      | protein FAM210B                             | 10 88195811 88205486   | 0.023011              | 1.20             | 0.042751              | -1.30            | 0.164016              | -1.15            |
| ZCCHC17      | zinc finger, CCHC domain containing 17      | 1 196669991 196727053  | 0.023011              | 1.17             | 0.933452              | -1.02            | 0.190998              | -1.12            |
| CD55         | complement decay-accelerating factor iso    | 1 65899277 65935555    | 0.023011              | -1.26            | 0.500253              | 1.14             | 0.000063              | -1.47            |
| RBMS1        | RNA-binding motif, single-stranded-inter    | 12 49004464 49219032   | 0.023011              | -1.41            | 0.270569              | 1.35             | 0.908722              | 1.03             |
| COX1         | cytochrome c oxidase subunit I              | MT 5858 7396           | 0.023022              | -1.47            | 0.516100              | -1.25            | 0.978457              | 1.01             |
| LOC102139817 | argininosuccinate synthase                  | 15 83059777 83061015   | 0.023063              | 2.88             | 0.812988              | -1.33            | 0.783827              | -1.19            |
| FYCO1        | FYVE and coiled-coil domain-containing      | 2 100932906 100995879  | 0.023063              | 1.38             | 0.321296              | 1.29             | 0.844328              | 1.04             |
| LOC107126569 |                                             | 10 81992149 81996705   | 0.023071              | 2.38             | 0.627047              | 1.54             | 0.176867              | -2.00            |
| KCTD14       | BTB/POZ domain-containing protein KC        | 14 73352601 73359940   | 0.023076              | -1.48            | 0.991951              | 1.01             | 0.723407              | -1.09            |
| LOC102129733 |                                             | 6 84966074 84968954    | 0.023098              | -1.27            | 0.687321              | -1.10            | 0.189428              | -1.18            |
| PRPF8        | pre-mRNA-processing-splicing factor 8       | 16 1542596 1582089     | 0.023115              | 1.35             | 0.859712              | -1.06            | 0.426847              | 1.14             |
| ZNF550       | zinc finger protein 550                     | 19 58183265 58196227   | 0.023117              | 1.41             | 0.917974              | 1.04             | 0.294197              | 1.22             |
| LOC102127867 | uncharacterized protein LOC102127867        | 3 184589778 184590626  | 0.023117              | -1.69            | 0.907411              | -1.08            | 0.845309              | -1.07            |
| UBXN10       | UBX domain-containing protein 10            | 1 208225583 208226425  | 0.023156              | 6.26             | 0.962754              | 1.13             | 0.549924              | -1.91            |
| C5H4orf19    | uncharacterized protein C4orf19 homolog     | 5 37207149 37209299    | 0.023156              | 1.44             | 0.579805              | -1.20            | 0.954433              | 1.02             |
| SI00BP       | S100P-binding protein isoform X2            | 1 195104234 195135520  | 0.023156              | -1.19            | 0.882408              | 1.03             | 0.763667              | 1.03             |
| SMC5         | structural maintenance of chromosomes p     | 15 80995322 81097169   | 0.023173              | -1.44            | 0.403167              | 1.29             | 0.195276              | 1.29             |
| PGM5         | phosphoglucomutase-like protein 5           | 15 79113922 79292157   | 0.023215              | 1.66             | 0.015539              | 2.24             | 0.800915              | -1.08            |
| DNAH11       | dynein heavy chain 11, axonemal             | 3 98833732 99215579    | 0.023275              | 4.53             | 0.878397              | -1.32            | 0.560487              | -1.69            |
| BACH2        | transcription regulator protein BACH2 iso   | 4 83729319 84013975    | 0.023275              | 1.52             | 0.328141              | 1.39             | 0.719545              | -1.10            |
| SLC25A19     | mitochondrial thiamine pyrophosphate car    | 16 72562300 72573917   | 0.023284              | -1.53            | 0.281211              | -1.45            | 0.481940              | -1.19            |
| P2RY13       | P2Y purinoreceptor 13                       | 2 53586515 53588053    | 0.023377              | 1.78             | 0.467846              | 1.43             | 0.475087              | 1.26             |
| SCGB3A2      | secretoglobin family 3A member 2            | 6 147125265 147128809  | 0.023379              | 4.10             | 0.965511              | -1.09            | 0.940974              | -1.08            |
| LOC102126820 | GRB2-related adapter protein isoform X4     | 16 19093840 19121822   | 0.023494              | 1.32             | 0.758185              | -1.09            | 0.699559              | 1.07             |
| VILL         | villin-like protein                         | 2 92870494 92884486    | 0.023511              | 1.76             | 0.068485              | -2.07            | 0.880868              | 1.06             |
| LOC102122175 | olfactory receptor 5D13-like                | 14 17212435 17213379   | 0.023532              | -2.70            | 0.001890              | 8.81             | 0.001507              | -4.33            |
| FEM1B        | protein fem-1 homolog B isoform X1          | 7 45991545 46004465    | 0.023545              | -1.30            | 0.135988              | 1.34             | 0.578715              | 1.09             |
| LOC107131113 | ras and Rab interactor 1-like               | 10 70421079 70452879   | 0.023603              | 2.26             | 0.979469              | -1.03            | 0.349293              | 1.52             |
| LOC102119746 |                                             | 5 82162141 82184301    | 0.023691              | -4.11            | 0.249729              | -3.68            | 0.095093              | 3.37             |
| LPA          | apolipoprotein(a) isoform X2                | 4 10128829 10354567    | 0.023729              | 3.62             | 0.514651              | 2.05             | 0.428880              | -1.80            |
| LOC102122444 | putative dimethylalanine monoxygenase       | 1 29091879 29112587    | 0.023762              | 4.25             | 0.579239              | 2.24             | 0.738778              | -1.40            |
| PBX1         | pre-B-cell leukemia transcription factor 1  | 1 22606322 22896426    | 0.023762              | 1.37             | 0.611813              | 1.16             | 0.285048              | 1.20             |
| MBD2         | methyl-CpG-binding domain protein 2         | 18 27315998 27381014   | 0.023762              | -1.23            | 0.903173              | -1.03            | 0.705491              | -1.05            |
| MRPL41       | 39S ribosomal protein L41, mitochondria     | 15 704794 705207       | 0.023762              | -1.40            | 0.657995              | -1.15            | 0.262852              | -1.23            |
| SLC25A36     | solute carrier family 25 member 36          | 2 43092469 43127354    | 0.023817              | -1.56            | 0.280299              | 1.47             | 0.374617              | 1.25             |
| IFITM1       | interferon-induced transmembrane protein    | 14 135969 136895       | 0.023826              | 1.39             | 0.282634              | 1.32             | 0.800883              | 1.05             |
| HMBOX1       | homeobox-containing protein 1 isoform X     | 8 29434960 29523370    | 0.023826              | 1.37             | 0.434569              | 1.24             | 0.716275              | 1.07             |
| RPRML        | reprimo-like protein                        | 16 57595693 57596055   | 0.023909              | 4.11             | 0.055362              | -5.15            | 0.003373              | -3.52            |
| LOC102118347 | calponin-2                                  | 5 102993900 102994829  | 0.023909              | 1.44             | 0.486663              | -1.25            | 0.210793              | 1.28             |
| LOC107129575 |                                             | 4 139771653 139773849  | 0.023909              | -1.90            | 0.367857              | -1.63            | 0.427611              | -1.35            |
| ALPK2        | alpha-protein kinase 2 isoform X2           | 18 21925400 22051406   | 0.023956              | 8.76             | 0.917946              | -1.23            | 0.245584              | 2.62             |
| MAEA         | macrophage erythroblast attachment isoform  | 5 12907112 1339702     | 0.024025              | -1.10            | 0.549857              | -1.05            | 0.613472              | -1.03            |
| TXNL1        | thioredoxin-like protein 1 isoform X2       | 18 23937247 23974806   | 0.024025              | -1.26            | 0.729007              | -1.08            | 0.703222              | 1.05             |
| OTUD6B       | OTU domain-containing protein 6B isofo      | 8 92232931 92271765    | 0.024025              | -1.70            | 0.114284              | 1.86             | 0.722817              | 1.12             |
| ZBTB7C       | zinc finger and BTB domain-containing p     | 18 33661339 33820647   | 0.024043              | 1.80             | 0.221333              | 1.77             | 0.583896              | -1.21            |
| CEP85L       | centrosomal protein of 85 kDa-like isoform  | 4 22452381 22629745    | 0.024087              | 1.48             | 0.878397              | 1.07             | 0.360295              | 1.23             |
| IRF1         | interferon regulatory factor 1              | 6 131474545 131480115  | 0.024169              | 1.39             | 0.987676              | -1.01            | 0.018273              | 1.45             |
| DDX60L       | probable ATP-dependent RNA helicase D       | 5 167598782 167709491  | 0.024169              | -1.42            | 0.560583              | 1.20             | 0.811482              | 1.06             |
| GBE1         | 1,4-alpha-glucan-branching enzyme isofo     | 2 186377700 186639270  | 0.024177              | -1.40            | 0.925617              | 1.04             | 0.616339              | 1.11             |



| Gene symbol  | Gene name                                                                  | chr_start_end          | Day3 adjusted P-value | Day3 fold change | Day5 adjusted P-value | Day5 fold change | Day7 adjusted P-value | Day7 fold change |
|--------------|----------------------------------------------------------------------------|------------------------|-----------------------|------------------|-----------------------|------------------|-----------------------|------------------|
| LOC102128090 | collagen alpha-1(III) chain-like                                           | 18 74081503 74082474   | 0.024224              | -5.16            | 0.915207              | 1.19             | 0.682835              | -1.46            |
| NLRCS5       | protein NLRCS5 isoform X1                                                  | 20 45050480 45109458   | 0.024257              | 1.25             | 0.659797              | 1.10             | 0.009380              | 1.31             |
| UNC45A       | protein unc-45 homolog A isoform X2                                        | 0 12081 30926          | 0.024272              | 1.24             | 0.967949              | 1.01             | 0.835898              | -1.03            |
| COMTD1       | uncharacterized protein LOC101867290                                       | 9 60346633 60348441    | 0.024272              | -1.46            | 0.352060              | -1.34            | 0.783297              | -1.07            |
| ANO3         | anoctamin-3 isoform X4                                                     | 14 40837701 41311576   | 0.024278              | 1.94             | 0.686010              | 1.29             | 0.478421              | 1.30             |
| RNF138       | E3 ubiquitin-protein ligase RNF138 isoform X1                              | 18 50104966 50141371   | 0.024278              | -1.72            | 0.143813              | 1.82             | 0.570577              | 1.20             |
| PTAR1        | protein prenilyltransferase alpha subunit repeat domain-containing protein | 15 80458491 80499923   | 0.024353              | -1.60            | 0.212951              | 1.58             | 0.488383              | 1.21             |
| PCDH7        | protocadherin-7 isoform X1                                                 | 5 30207457 30637732    | 0.024361              | 1.55             | 0.152241              | 1.60             | 0.161631              | 1.38             |
| ANKRD49      | ankyrin repeat domain-containing protein                                   | 14 90345600 90347431   | 0.024482              | -1.31            | 0.383687              | 1.22             | 0.483611              | 1.12             |
| KIAA1324     | KIAA1324 ortholog                                                          | 1 117562082 117649367  | 0.024501              | 2.75             | 0.956039              | 1.08             | 0.363142              | -1.67            |
| JKAMP        | JNK1/MAPK8-associated membrane protein                                     | 7 123774786 123795854  | 0.024501              | -1.30            | 0.044771              | 1.45             | 0.039889              | 1.31             |
| SLC22A23     | solute carrier family 22 member 23 isoform X1                              | 4 167630170 167819219  | 0.024538              | 1.47             | 0.243410              | -1.43            | 0.007774              | -1.61            |
| FTH1         | uncharacterized protein LOC101926130                                       | 14 12247662 12250434   | 0.024543              | -1.69            | 0.513010              | -1.36            | 0.896263              | -1.05            |
| ENPP3        | ectonucleotide pyrophosphatase/phosphodiesterase 3 isoform X1              | 4 35822200 35918692    | 0.024577              | 3.07             | 0.782247              | 1.38             | 0.400798              | 1.69             |
| AMBRA1       | activating molecule in BECN1-regulated autophagy                           | 14 21036206 21192280   | 0.024597              | 1.17             | 0.763801              | -1.05            | 0.826530              | -1.02            |
| C3H7orf57    | uncharacterized protein C7orf57 homolog                                    | 3 72544091 72571691    | 0.024620              | 4.52             | 0.975216              | -1.07            | 0.165343              | -3.32            |
| ZNF285       | zinc finger protein 285 isoform X1                                         | 19 45085785 45099608   | 0.024620              | 1.39             | 0.021021              | 1.63             | 0.417480              | -1.16            |
| DENND1B      | DENN domain-containing protein 1B isoform X1                               | 1 55784836 56079282    | 0.024620              | -1.69            | 0.485680              | 1.37             | 0.418405              | 1.27             |
| LOC101867330 | uncharacterized protein LOC101867330                                       | 17 59812395 59813417   | 0.024620              | -1.91            | 0.995190              | -1.00            | 0.655711              | 1.19             |
| LOC102143237 | ERV-BabFenv provirus ancestral Env protein                                 | 3 133653626 133655302  | 0.024687              | -1.54            | 0.141819              | -1.63            | 0.955365              | -1.02            |
| FMOD         | fibromodulin                                                               | 1 61811950 61817944    | 0.024716              | 1.46             | 0.008569              | 1.91             | 0.554182              | 1.14             |
| INTS9        | integrator complex subunit 9                                               | 8 29229322 29356493    | 0.024822              | 1.22             | 0.001635              | -1.47            | 0.789512              | -1.03            |
| TMEM9B       | transmembrane protein 9B isoform X1                                        | 14 58872415 58887968   | 0.024890              | -1.20            | 0.226211              | 1.19             | 0.643844              | 1.05             |
| PRKRA        | interferon-inducible double-stranded RNA-dependent protein kinase          | 12 67424478 67444330   | 0.024918              | -1.34            | 0.154184              | -1.37            | 0.146750              | 1.25             |
| SOGA1        | protein SOGA1                                                              | 10 68361765 68422449   | 0.025024              | 1.64             | 0.688158              | 1.21             | 0.183820              | 1.42             |
| SPIN4        | spindlin-4                                                                 | X 60029387 60030136    | 0.025024              | -1.62            | 0.277925              | 1.52             | 0.285501              | 1.33             |
| LOC102115346 | uncharacterized protein LOC102115346                                       | 3 175398715 175406204  | 0.025110              | 2.26             | 0.911867              | -1.11            | 0.740794              | 1.17             |
| IRF4         | interferon regulatory factor 4 isoform X2                                  | 4 170681531 170695261  | 0.025110              | 2.06             | 0.204623              | -2.02            | 0.003373              | 2.58             |
| CDH23        | cadherin-23 isoform X2                                                     | 9 63825763 64206925    | 0.025110              | 1.58             | 0.410659              | -1.38            | 0.676952              | 1.12             |
| ABCC4        | multidrug resistance-associated protein 4 isoform X1                       | 17 77633902 77932627   | 0.025165              | -1.34            | 0.794925              | 1.09             | 0.663130              | 1.08             |
| LOC102122348 | bile salt-activated lipase isoform X1                                      | 15 5716681 5726719     | 0.025215              | 3.79             | 0.694214              | 1.65             | 0.083435              | -3.23            |
| TEX30        | testis-expressed sequence 30 protein isoform X1                            | 17 85334720 85338344   | 0.025272              | -1.29            | 0.476392              | 1.17             | 0.904662              | 1.02             |
| DNAJC24      | dnaJ homolog subfamily C member 24 isoform X1                              | 14 36006735 36062551   | 0.025304              | -1.37            | 0.344528              | 1.28             | 0.000030              | 1.73             |
| LOC102136641 | uncharacterized protein LOC102136641                                       | 15 4617457 4623441     | 0.025359              | 1.44             | 0.311424              | -1.36            | 0.832835              | 1.05             |
| LOC102176733 | uncharacterized protein LOC102176733                                       | 11 68012273 68036669   | 0.025373              | -2.53            | 0.197066              | -2.50            | 0.009188              | -3.11            |
| ITPR1P       | inositol trisphosphate receptor type 1 protein                             | 9 103394029 103417589  | 0.025408              | 1.54             | 0.808166              | -1.12            | 0.643624              | 1.13             |
| ABCC3        | canalicular multispecific organic anion transporter 3                      | 16 36036665 36095696   | 0.025408              | 1.35             | 0.005107              | -1.72            | 0.000062              | -1.66            |
| TRMT1L       | TRMT1-like protein                                                         | 1 43067609 43105214    | 0.025408              | -1.32            | 0.661762              | 1.12             | 0.154974              | 1.23             |
| FARSB        | phenylalanine--tRNA ligase beta subunit isoform X1                         | 12 112320202 112403193 | 0.025408              | -1.59            | 0.645472              | 1.23             | 0.658838              | 1.13             |
| NDUFAF5      | NADH dehydrogenase [ubiquinone] 1 alpha subfamily 5 isoform X1             | 10 48654850 48690345   | 0.025454              | -1.46            | 0.692301              | 1.16             | 0.708026              | -1.09            |
| SAC3D1       | SAC3 domain-containing protein 1                                           | 14 9494548 9498542     | 0.025454              | -1.47            | 0.001026              | -2.22            | 0.853003              | 1.05             |
| SCGB3A1      | secretoglobin family 3A member 1                                           | 6 180618958 180620333  | 0.025490              | 12.83            | 0.923518              | 1.36             | 0.483817              | -2.80            |
| CIQTNF3      | complement C1q tumor necrosis factor receptor 3                            | 6 34756722 34779532    | 0.025490              | 3.10             | 0.365239              | 2.19             | 0.460321              | 1.53             |
| C15H9orf72   | protein C9orf72 homolog isoform X1                                         | 15 51211868 51231527   | 0.025505              | -1.59            | 0.847652              | 1.11             | 0.911428              | 1.04             |
| LOC102133503 | uncharacterized protein LOC102133503                                       | 10 27642405 27653167   | 0.025505              | -2.11            | 0.639418              | -1.39            | 0.096016              | -1.89            |
| COG5         | conserved oligomeric Golgi complex subunit 5                               | 3 139676933 140039540  | 0.025510              | -1.30            | 0.791391              | 1.08             | 0.043496              | 1.30             |
| LOC102117863 | cystathionine gamma-lyase                                                  | 0 1077 6373            | 0.025510              | -2.08            | 0.666384              | 1.36             | 0.501591              | 1.32             |
| PTGER2       | prostaglandin E2 receptor EP2 subtype isoform X1                           | 7 116443212 116456168  | 0.025570              | -1.76            | 0.889627              | 1.10             | 0.923819              | -1.04            |
| SCUBE2       | signal peptide, CUB and EGF-like domain-containing protein 2               | 14 58756536 58821682   | 0.025590              | 1.49             | 0.991268              | -1.01            | 0.502436              | -1.17            |
| HERC2        | E3 ubiquitin-protein ligase HERC2 isoform X1                               | 7 6106196 6338224      | 0.025590              | 1.17             | 0.965755              | -1.01            | 0.751553              | -1.03            |
| U2SURP       | U2 snRNP-associated SURP motif-containing protein 1                        | 2 45123798 45176587    | 0.025590              | -1.29            | 0.335125              | 1.22             | 0.553696              | 1.09             |
| HTATSF1      | HIV Tat-specific factor 1                                                  | X 133265740 133280444  | 0.025691              | 1.22             | 0.999858              | -1.00            | 0.958012              | 1.01             |
| DNAH2        | dynein heavy chain 2, axonemal                                             | 16 7805156 7935717     | 0.025748              | 4.65             | 0.912465              | -1.25            | 0.522201              | -1.80            |
| ZNF713       | zinc finger protein 713 isoform X2                                         | 3 64322680 64350523    | 0.025872              | 1.65             | 0.909845              | -1.07            | 0.186344              | 1.43             |
| APRT         | adenine phosphoribosyltransferase isoform X1                               | 20 77249386 77251669   | 0.025872              | -1.43            | 0.990598              | -1.01            | 0.788063              | -1.06            |
| CHST13       | carbohydrate sulfotransferase 13                                           | 2 145782652 145799373  | 0.025876              | -2.42            | 0.795938              | -1.29            | 0.870532              | 1.10             |
| MRPL35       | 39S ribosomal protein L35, mitochondrial                                   | 13 23214657 23226894   | 0.025974              | -1.26            | 0.821157              | 1.06             | 0.819389              | 1.03             |
| DCAF4L1      | DDB1- and CUL4-associated factor 4-like protein 1                          | 5 41733933 41735123    | 0.026105              | -1.69            | 0.024114              | 2.53             | 0.375862              | 1.33             |
| COL14A1      | collagen alpha-1(XIV) chain isoform X1                                     | 8 121420924 121649496  | 0.026112              | 1.64             | 0.984500              | 1.01             | 0.555846              | -1.19            |
| TMEM165      | transmembrane protein 165 isoform X1                                       | 5 79056427 79086325    | 0.026144              | -1.59            | 0.344883              | 1.44             | 0.989847              | 1.00             |
| BEGAIN       | brain-enriched guanylate kinase-associated protein 1                       | 7 165753122 165784203  | 0.026201              | 2.14             | 0.991856              | 1.01             | 0.464788              | 1.39             |
| CNNM2        | metal transporter CNNM2 isoform X1                                         | 9 101953925 102121920  | 0.026211              | 1.29             | 0.149587              | -1.31            | 0.779212              | -1.05            |
| LTA          | lymphotoxin-alpha                                                          | 4 139308157 139309105  | 0.026218              | 1.82             | 0.411140              | -1.58            | 0.492094              | 1.28             |
| VSTM1        | V-set and transmembrane domain-containing protein 1                        | 19 54906649 54915019   | 0.026240              | 4.36             | 0.476285              | -2.60            | 0.905755              | 1.12             |
| LOC102115786 | uncharacterized protein LOC102115786                                       | 14 37013520 37073000   | 0.026283              | 17.54            | 0.060803              | -44.25           | 0.005452              | 38.07            |
| ZKSCAN7      | LOW QUALITY PROTEIN: zinc finger protein 7                                 | 2 99550211 99564319    | 0.026364              | 1.50             | 0.197816              | 1.49             | 0.561082              | 1.15             |
| DNAJB1       | dnaJ homolog subfamily B member 1 isoform X1                               | 19 14906849 14910142   | 0.026530              | 1.32             | 0.029284              | 1.52             | 0.239377              | -1.20            |
| TK2          | thymidine kinase 2, mitochondrial                                          | 20 54615958 54653721   | 0.026583              | 1.29             | 0.760313              | 1.08             | 0.882138              | -1.03            |
| AARD         | alanine and arginine-rich domain-containing protein 1                      | 8 118196436 118200921  | 0.026638              | -2.63            | 0.252132              | -2.43            | 0.926487              | -1.06            |
| MED24        | mediator of RNA polymerase II transcript II subunit 24                     | 16 51635683 51674518   | 0.026648              | 1.22             | 0.918417              | -1.03            | 0.600978              | -1.06            |
| METTL15      | probable methyltransferase-like protein 15                                 | 14 38937779 39372298   | 0.026648              | -1.29            | 0.985151              | 1.01             | 0.263693              | 1.17             |
| WSCD1        | WSC domain-containing protein 1                                            | 16 6101743 6143375     | 0.026831              | 1.98             | 0.600009              | 1.40             | 0.817276              | -1.11            |
| EYA4         | eyes absent homolog 4 isoform X2                                           | 4 37482085 37725117    | 0.026845              | 4.56             | 0.009186              | 16.09            | 0.084933              | -3.87            |
| GLS          | glutaminase kidney isoform, mitochondrial                                  | 12 80134652 80218796   | 0.026845              | -1.54            | 0.311375              | 1.43             | 0.930758              | 1.03             |
| ZNF654       | zinc finger protein 654 isoform X2                                         | 2 180030306 180110401  | 0.026951              | -1.66            | 0.416697              | 1.42             | 0.355333              | 1.30             |
| CCDC34       | coiled-coil domain-containing protein 34                                   | 14 40134269 40158686   | 0.027008              | -1.37            | 0.982409              | -1.01            | 0.987187              | 1.00             |
| ZMYM6        | zinc finger MYM-type protein 6 isoform X1                                  | 1 192893015 192941423  | 0.027025              | -1.28            | 0.389595              | 1.20             | 0.220754              | 1.19             |
| C2H3orf58    | deleted in autism protein 1                                                | 2 46189042 46212453    | 0.027212              | -1.85            | 0.276031              | 1.72             | 0.320969              | 1.41             |
| LOC102119724 | uncharacterized protein LOC102119724                                       | 11 136913591 136916806 | 0.027239              | -5.69            | 0.895774              | 1.34             | 0.000415              | -15.12           |
| KCNAB3       | voltage-gated potassium channel subunit beta 3                             | 16 8030478 8037655     | 0.027399              | 1.95             | 0.961968              | 1.05             | 0.070832              | -1.86            |
| FAM57A       | protein FAM57A isoform X1                                                  | 16 545456 554094       | 0.027481              | -1.47            | 0.466181              | -1.28            | 0.756290              | 1.08             |
| ARL2BP       | ADP-ribosylation factor-like protein 2-binding protein 2                   | 20 45273212 45280692   | 0.027530              | -1.23            | 0.236459              | 1.22             | 0.804393              | -1.03            |
| GF2H2        | general transcription factor IIH subunit 2 isoform X1                      | 6 69416970 69446502    | 0.027544              | -1.31            | 0.086294              | 1.41             | 0.731519              | -1.06            |
| DAW1         | dynein assembly factor with WDR repeat domain-containing protein 1         | 12 117667776 117725555 | 0.027606              | 3.24             | 0.600597              | 1.88             | 0.895403              | -1.12            |
| TLL2         | tolloid-like protein 2 isoform X2                                          | 9 95073198 95218742    | 0.027606              | 2.24             | 1.000000              | -1.00            | 0.287784              | -1.63            |
| KAT7         | histone acetyltransferase KAT7 isoform X1                                  | 16 35181559 35222859   | 0.027606              | 1.21             | 0.434747              | -1.14            | 0.641767              | 1.05             |
| LOC102124525 | uncharacterized protein LOC102124525                                       | 16 43500249 43514896   | 0.027606              | -1.28            | 0.530150              | 1.15             | 0.545004              | -1.09            |

| Gene symbol  | Gene name                                            | chr_start_end          | Day3 adjusted P-value | Day3 fold change | Day5 adjusted P-value | Day5 fold change | Day7 adjusted P-value | Day7 fold change |
|--------------|------------------------------------------------------|------------------------|-----------------------|------------------|-----------------------|------------------|-----------------------|------------------|
| MFN1         | mitofusin-1 isoform X1                               | 2 83825395 83867389    | 0.027606              | -1.36            | 0.703626              | 1.12             | 0.743212              | 1.06             |
| TTC16        | tetratricopeptide repeat protein 16                  | 15 101039683 101056131 | 0.027619              | 2.75             | 0.894311              | -1.18            | 0.200339              | -2.05            |
| XKR7         | XK-related protein 7                                 | 10 63296740 63324060   | 0.027821              | 1.97             | 0.211777              | -1.98            | 0.559082              | -1.26            |
| CCR7         | chemokine (C-C motif) receptor 7 precurs             | 16 52204193 52214864   | 0.027877              | 2.04             | 0.395337              | -1.69            | 0.329512              | 1.49             |
| RPRD2        | regulation of nuclear pre-mRNA domain-               | 1 101600008 101717206  | 0.027929              | 1.23             | 0.970917              | -1.01            | 0.241016              | 1.15             |
| ARHGAP35     | rho GTPase-activating protein 35 isoform             | 19 47678904 47773125   | 0.027940              | 1.35             | 0.483206              | -1.20            | 0.377776              | -1.16            |
| UHRF2        | E3 ubiquitin-protein ligase UHRF2 isofo              | 15 72493102 72594440   | 0.027940              | -1.33            | 0.874543              | 1.06             | 0.960110              | -1.01            |
| LOC102141118 |                                                      | 18 23045106 23052301   | 0.027940              | -2.67            | 0.987179              | 1.02             | 0.750964              | 1.22             |
| ATG13        | autophagy-related protein 13 isoform X5              | 14 20903775 20933375   | 0.027984              | 1.20             | 0.293733              | -1.17            | 0.948774              | 1.01             |
| RCAN1        | LOW QUALITY PROTEIN: calcipressin                    | 3 12253812 12261315    | 0.027984              | -1.53            | 0.458135              | 1.32             | 0.817975              | -1.07            |
| CLEC1A       | C-type lectin domain family 1 member A               | 11 10410660 10438996   | 0.027991              | 1.67             | 0.228809              | 1.65             | 0.661156              | 1.15             |
| KHNYN        | protein KHNYN isoform X2                             | 7 88211670 88225550    | 0.027991              | 1.24             | 0.968876              | -1.01            | 0.693697              | -1.05            |
| ATF3         | cyclic AMP-dependent transcription facto             | 1 71206488 71211006    | 0.028118              | 1.61             | 0.899803              | 1.08             | 0.007913              | -1.82            |
| LOC107127331 | basic proline-rich protein-like                      | 14 103672 105871       | 0.028285              | 1.98             | 0.901660              | 1.11             | 0.268498              | -1.59            |
| 8-Mar        | #N/A                                                 | #N/A                   | 0.028285              | 1.24             | 0.387726              | -1.17            | 0.418257              | 1.11             |
| PTPRA        | receptor-type tyrosine-protein phosphatase           | 10 59473623 59591221   | 0.028285              | 1.19             | 0.830080              | 1.04             | 0.703385              | -1.04            |
| GEMIN2       | gem-associated protein 2 isoform X1                  | 7 103097337 103120046  | 0.028285              | -1.24            | 0.828194              | 1.06             | 0.816854              | 1.03             |
| SLC35A1      | CMP-sialic acid transporter isoform X2               | 4 86416584 86443075    | 0.028285              | -1.34            | 0.400284              | -1.23            | 0.583858              | -1.10            |
| ZNF280D      |                                                      | 7 33725459 33824569    | 0.028285              | -1.50            | 0.624435              | 1.21             | 0.464074              | 1.19             |
| ANKRD66      | LOW QUALITY PROTEIN: ankyrin rep                     | 4 123785243 123797148  | 0.028291              | 8.16             | 0.979974              | 1.08             | 0.492134              | -2.40            |
| ADCY2        | adenylate cyclase type 2                             | 6 7374937 7798887      | 0.028326              | 2.02             | 0.173670              | 2.23             | 0.26408               | -1.57            |
| NSD1         | histone-lysine N-methyltransferase, H3 ly            | 6 176936623 177112330  | 0.028326              | 1.19             | 0.619074              | -1.09            | 0.563394              | 1.06             |
| CPB1         | carboxypeptidase B                                   | 2 51044843 51076282    | 0.028498              | 7.38             | 0.156802              | -12.46           | 0.300901              | -3.43            |
| SLIT2        | slit homolog 2 protein isoform X1                    | 5 19409420 19777628    | 0.028498              | 1.70             | 0.197807              | 1.71             | 0.885010              | 1.05             |
| LOC107129652 |                                                      | 5 1177498 1180662      | 0.028514              | 5.18             | 0.927990              | -1.27            | 0.549866              | -1.87            |
| LOC102130893 |                                                      | 6 43611497 43614558    | 0.028514              | 2.41             | 0.229333              | 2.32             | 0.603356              | -1.32            |
| PDK2         | pyruvate dehydrogenase kinase, isozyme 2             | 16 35487501 35501834   | 0.028514              | 1.52             | 0.327427              | -1.40            | 0.437127              | -1.21            |
| LOC102119202 | protein phosphatase 1 regulatory inhibitor           | 10 70524515 70537190   | 0.028514              | 1.44             | 0.927196              | -1.04            | 0.498446              | 1.16             |
| CMSS1        | protein CMSS1 isoform X2                             | 2 171969012 172341797  | 0.028514              | -1.39            | 0.581917              | -1.19            | 0.293571              | 1.22             |
| HELLS        | lymphoid-specific helicase isoform X1                | 9 93107702 93161689    | 0.028514              | -1.92            | 0.907374              | -1.10            | 0.476279              | 1.31             |
| SGPP1        | sphingosine-1-phosphate phosphatase 1                | 7 128032140 12807921   | 0.028571              | -1.71            | 0.103687              | 1.92             | 0.254535              | 1.41             |
| EIF2AK1      | eukaryotic translation initiation factor 2- $\alpha$ | 3 41296933 41339389    | 0.028585              | 1.30             | 0.001123              | -1.72            | 0.577203              | 1.09             |
| CFAP99       | cilia- and flagella-associated protein 99            | 5 2439957 2475882      | 0.028604              | 2.18             | 0.582730              | -1.55            | 0.883749              | -1.09            |
| DNAJC19      | mitochondrial import inner membrane tra              | 2 85582431 85587223    | 0.028640              | -1.21            | 0.804397              | 1.05             | 0.609575              | -1.06            |
| EVA1A        | protein eva-1 homolog A                              | 13 34341732 34365711   | 0.028640              | -1.46            | 0.415212              | -1.30            | 0.294069              | -1.25            |
| SPAST        | spastin isoform X2                                   | 13 78574217 78661061   | 0.028703              | -1.53            | 0.150284              | 1.61             | 0.444160              | 1.21             |
| LOC102131934 | uncharacterized protein LOC102131934 i               | 7 118168418 118169092  | 0.028723              | 2.41             | 0.615213              | 1.52             | 0.802997              | 1.16             |
| RCOR3        | REST corepressor 3 isoform X1                        | 1 69822193 69882739    | 0.028723              | -1.38            | 0.273590              | 1.34             | 0.455836              | 1.15             |
| LOC102128509 | kelch repeat and BTB domain-containing               | 17 20373203 20375227   | 0.028723              | -1.42            | 0.200018              | 1.42             | 0.021826              | 1.48             |
| LMFIC        | myoD family inhibitor domain-containing              | 3 147444474 147533484  | 0.028747              | -1.71            | 0.363395              | 1.51             | 0.594099              | 1.19             |
| LMOD2        | leiomodin-2                                          | 3 156465300 156473014  | 0.028916              | 20.37            | 1.000000              | -6.05            | 0.531445              | -3.28            |
| KIF27        | kinesin-like protein KIF27 isoform X1                | 15 94644577 94721659   | 0.028995              | 1.59             | 0.895927              | 1.08             | 0.944041              | -1.02            |
| TRAF7        | E3 ubiquitin-protein ligase TRAF7 isofo              | 20 2238914 2251750     | 0.029006              | 1.14             | 0.060818              | -1.20            | 0.726581              | -1.03            |
| MBD4         | methyl-CpG-binding domain protein 4 iso              | 11 87725492 87734479   | 0.029053              | -1.13            | 0.593152              | -1.07            | 0.005628              | 1.18             |
| GZF1         | GDNF-inducible zinc finger protein 1 iso             | 10 38896046 38902085   | 0.029080              | -1.28            | 0.452878              | 1.18             | 0.365891              | 1.14             |
| NOS2         | nitric oxide synthase, inducible                     | 16 23954421 23995815   | 0.029096              | 2.21             | 0.795840              | 1.25             | 0.703160              | 1.20             |
| SPAG8        |                                                      | 15 43297775 43300300   | 0.029159              | 2.28             | 0.473421              | -1.72            | 0.350078              | -1.58            |
| SIPAIL2      | signal-induced proliferation-associated 1-           | 1 17059821 17174703    | 0.029159              | 1.40             | 0.088237              | 1.52             | 0.764306              | 1.07             |
| TFPI2        | tissue factor pathway inhibitor 2                    | 3 118091958 118095895  | 0.029159              | -4.64            | 0.913958              | 1.23             | 0.215363              | -2.87            |
| GLI1         | zinc finger protein GLI1                             | 11 56444265 56452584   | 0.029288              | 1.82             | 0.278050              | 1.70             | 0.867281              | 1.07             |
| USP2         | ubiquitin carboxyl-terminal hydrolase 2 is           | 14 115395805 115418031 | 0.029355              | 2.09             | 0.931756              | -1.09            | 0.350770              | -1.48            |
| LOC102122532 | putative V-set and immunoglobulin doma               | 0 621603 623586        | 0.029355              | 2.80             | 0.451398              | 1.92             | 0.830479              | 1.14             |
| LOC102142225 | Ig heavy chain V-III region 23-like                  | 0 781424 799944        | 0.029358              | 3.22             | 0.842663              | -1.30            | 0.607043              | 1.43             |
| PLB1         | phospholipase B1, membrane-associated                | 13 82172051 82272658   | 0.029358              | 1.83             | 0.298899              | 1.73             | 0.467078              | -1.26            |
| IL1A         | interleukin-1 alpha isoform X1                       | 13 16914399 16922939   | 0.029358              | -1.78            | 0.084996              | -2.08            | 0.882032              | 1.06             |
| SDC1         | syndecan-1 isoform X1                                | 13 90784056 90807434   | 0.029369              | -1.49            | 0.810316              | 1.11             | 0.730263              | 1.09             |
| BIRC2        | baculoviral IAP repeat-containing protein            | 14 98275454 98297870   | 0.029394              | -1.25            | 0.352499              | 1.19             | 0.561590              | 1.08             |
| ALMS1        | Alstrom syndrome protein 1 isoform X4                | 13 36241317 36463165   | 0.029404              | 1.20             | 0.912061              | 1.03             | 0.977183              | -1.00            |
| SLC35F5      | solute carrier family 35 member F5 isofo             | 12 18529864 18567421   | 0.029469              | -1.52            | 0.884756              | 1.08             | 0.897158              | 1.04             |
| MET          | hepatocyte growth factor receptor                    | 3 149219455 149310516  | 0.029523              | 1.47             | 0.621569              | 1.20             | 0.402860              | -1.20            |
| NPTX2        | neuronal pentraxin-2                                 | 3 42845420 42856925    | 0.029608              | 1.97             | 0.015165              | 3.79             | 0.632955              | 1.23             |
| EMC2         | ER membrane protein complex subunit 2                | 8 109549277 109598408  | 0.029608              | -1.28            | 0.979469              | 1.01             | 0.952415              | -1.01            |
| LOC102130792 |                                                      | 7 117519314 117522891  | 0.029789              | 8.74             | 0.542210              | 3.14             | 0.692029              | -1.52            |
| TOR1AIP2     | torsin-1A-interacting protein 2                      | 1 37798627 37806782    | 0.029800              | -1.23            | 0.011909              | 1.43             | 0.872020              | 1.02             |
| ZNF415       | zinc finger protein 415 isoform X1                   | 19 53921581 53938390   | 0.029812              | 1.29             | 0.052870              | 1.43             | 0.983376              | -1.00            |
| R3HDM2       | R3H domain-containing protein 2 isoform              | 11 56215082 56275032   | 0.029828              | 1.23             | 0.831558              | -1.05            | 0.605452              | -1.07            |
| DDAH1        | N(G),N(G)-dimethylarginine dimethylam                | 1 141674598 141927133  | 0.029828              | -1.32            | 0.741002              | 1.10             | 0.660853              | 1.08             |
| ASS1         | argininosuccinate synthase                           | 15 8553021 8602835     | 0.029829              | 1.94             | 0.590391              | 1.41             | 0.464587              | -1.33            |
| SOC6         | suppressor of cytokine signaling 6                   | 18 9780447 9782054     | 0.029868              | -1.52            | 0.613389              | 1.22             | 0.878517              | -1.04            |
| ITH5         | inter-alpha-trypsin inhibitor heavy chain I          | 9 7877842 7980730      | 0.029896              | 1.58             | 0.371859              | 1.41             | 0.716275              | -1.11            |
| INO80D       | INO80 complex subunit D isoform X1                   | 12 95578708 95665099   | 0.029900              | -1.41            | 0.602229              | 1.18             | 0.799286              | -1.06            |
| AEBP1        | adipocyte enhancer-binding protein 1 isof            | 3 76403949 76413654    | 0.029927              | 1.54             | 0.996370              | 1.00             | 0.922429              | 1.03             |
| VPS26A       |                                                      | 9 66526949 66579895    | 0.029927              | -1.33            | 0.383632              | 1.24             | 0.925824              | 1.02             |
| LOC102137598 | putative pregnancy-specific beta-1-glycop            | 19 43211925 43226464   | 0.029927              | -15.10           | 1.000000              | 6.13             | 0.773473              | -1.54            |
| PABPC4L      | LOW QUALITY PROTEIN: polyadenyla                     | 5 133343920 133345083  | 0.029972              | 1.65             | 0.947723              | 1.05             | 0.058921              | 1.60             |
| WBP5         | WW domain-binding protein 5                          | X 100184125 100184442  | 0.029995              | -1.24            | 0.825364              | 1.05             | 0.764960              | 1.04             |
| SREK1        | splicing regulatory glutamine/lysine-rich p          | 6 66000048 66033639    | 0.029995              | -1.46            | 0.669107              | 1.17             | 0.799557              | 1.07             |
| CCR3         | C-C chemokine receptor type 3                        | 2 101275794 101276861  | 0.029995              | 1.81             | 0.993973              | 1.01             | 0.572400              | 1.22             |
| WBP4         | WW domain-binding protein 4                          | 17 20311035 20334752   | 0.030058              | -1.17            | 0.851061              | 1.04             | 0.263672              | 1.11             |
| INO80        | DNA helicase INO80 isoform X3                        | 7 17866524 17986278    | 0.030068              | 1.21             | 0.925333              | -1.02            | 0.867171              | 1.02             |
| FMO5         | dimethylaniline monooxygenase [N-oxide               | 1 103930446 103952716  | 0.030068              | -1.34            | 0.931512              | 1.03             | 0.036772              | 1.36             |
| ZNF639       | zinc finger protein 639                              | 2 83807452 83813661    | 0.030068              | -1.35            | 0.086736              | 1.47             | 0.507061              | 1.13             |
| CTEN2        | uncharacterized protein LOC101866726                 | X 149836838 149839712  | 0.030068              | -1.46            | 0.238299              | -1.44            | 0.225169              | -1.29            |
| LOC102133992 |                                                      | 1 199568110 199571849  | 0.030068              | -1.47            | 0.777430              | -1.13            | 0.458277              | -1.19            |
| LOC107130375 | T-cell receptor alpha chain V region 2B4-            | 7 85861552 85862119    | 0.030197              | 11.36            | 0.226421              | -9.00            | 0.841149              | 1.29             |
| FBXO15       | F-box only protein 15 isoform X1                     | 18 5981815 6057908     | 0.030383              | 2.95             | 0.857191              | -1.27            | 0.689659              | -1.33            |
| SLC47A2      | multidrug and toxin extrusion protein 2              | 16 19652324 19686152   | 0.030394              | 3.13             | 0.802001              | 1.37             | 0.284939              | -2.04            |

| Gene symbol  | Gene name                                                      | chr_start_end          | Day3 adjusted P-value | Day3 fold change | Day5 adjusted P-value | Day5 fold change | Day7 adjusted P-value | Day7 fold change |
|--------------|----------------------------------------------------------------|------------------------|-----------------------|------------------|-----------------------|------------------|-----------------------|------------------|
| KIF9         | kinesin-like protein KIF9 isoform X3                           | 2 102253423 102308559  | 0.030394              | 1.34             | 0.568994              | 1.17             | 0.121725              | -1.28            |
| ACTR3B       | actin-related protein 3B isoform X1                            | 3 185487739 185587227  | 0.030394              | -1.30            | 0.772749              | -1.08            | 0.585558              | -1.09            |
| BORCS7       | UPF0693 protein C10orf32 homolog                               | 9 101890213 101900453  | 0.030395              | -1.42            | 0.233307              | 1.41             | 0.684166              | 1.09             |
| LRRC31       | leucine-rich repeat-containing protein 31 isoform X1           | 2 74035700 74066594    | 0.030404              | 10.71            | 0.204961              | 9.45             | 0.764306              | -1.42            |
| BARX1        | homeobox protein BarH-like 1                                   | 15 107998744 107999537 | 0.030404              | 8.40             | 1.000000              | 1.56             | 0.975276              | -1.04            |
| XIRP2        | xin actin-binding repeat-containing protein 2                  | 12 55781577 56125865   | 0.030404              | -3.42            | 0.904486              | -1.20            | 0.028728              | -3.71            |
| LOC102117865 | asialoglycoprotein receptor 2-like                             | 0 3320 4063            | 0.030410              | 16.84            | 1.000000              | -11.70           | 0.589702              | -2.25            |
| PTPN4        | tyrosine-protein phosphatase non-receptor type 4               | 12 12187237 12473056   | 0.030453              | -1.41            | 0.250488              | 1.38             | 0.419175              | 1.18             |
| SHMT1        | serine hydroxymethyltransferase, cytosolic                     | 16 18675537 18705981   | 0.030453              | -1.49            | 0.653994              | 1.19             | 0.599303              | -1.14            |
| HINT3        | histidine triad nucleotide-binding protein 3                   | 4 30033290 30055145    | 0.030567              | -1.43            | 0.456518              | 1.26             | 0.521956              | 1.15             |
| RABGGTB      | geranylgeranyl transferase type-2 subunit gamma                | 1 151481116 151489655  | 0.030596              | -1.39            | 0.988314              | 1.01             | 0.742241              | -1.07            |
| COL20A1      | LOW QUALITY PROTEIN: collagen alpha 2(I) chain                 | 10 95481495 95518641   | 0.030613              | 2.81             | 0.099882              | 3.65             | 0.063184              | -2.88            |
| FNDC5        | fibronectin type III domain-containing protein 5               | 1 195091561 195096177  | 0.030665              | 1.73             | 0.979788              | -1.02            | 0.121824              | 1.54             |
| ARMC4        | armadillo repeat-containing protein 4 isoform X1               | 9 28189684 28382921    | 0.030875              | 4.62             | 0.995062              | -1.01            | 0.534756              | -1.82            |
| MDC1         | mediator of DNA damage checkpoint protein 1                    | 4 140249068 140263483  | 0.030920              | 1.23             | 0.566538              | 1.12             | 0.563120              | 1.08             |
| TEAD4        | transcriptional enhancer factor TEF-3 isoform X1               | 11 3186517 3237607     | 0.030930              | 1.45             | 0.251526              | 1.42             | 0.293671              | -1.25            |
| BCL11A       | B-cell lymphoma/leukemia 11A isoform X1                        | 13 49582471 49682547   | 0.030935              | 1.53             | 0.214233              | -1.52            | 0.258108              | 1.31             |
| ZNF451       | zinc finger protein 451 isoform X2                             | 4 113488296 113568759  | 0.030935              | -1.26            | 0.327647              | 1.21             | 0.757686              | 1.05             |
| ADD1         | alpha-adducin isoform X1                                       | 5 2956085 3013609      | 0.030987              | 1.14             | 0.778099              | 1.04             | 0.583146              | 1.09             |
| FAM131C      | protein FAM131C                                                | 1 212335852 212354852  | 0.031024              | 6.15             | 0.912891              | 1.18             | 0.120509              | -2.89            |
| TSPAN11      | tetraspanin-11 isoform X1                                      | 11 31677856 31715880   | 0.031029              | 1.51             | 0.811777              | 1.12             | 0.965303              | -1.01            |
| UBR4         | E3 ubiquitin-protein ligase UBR4 isoform X1                    | 1 209221838 209362271  | 0.031029              | 1.16             | 0.525333              | -1.09            | 0.178740              | -1.11            |
| PLEKHM2      | pleckstrin homology domain-containing protein 2                | 1 212710826 212724635  | 0.031029              | -1.25            | 0.187458              | -1.26            | 0.174843              | -1.18            |
| LOC102132758 | putative 60S ribosomal protein L32'                            | 11 87769488 87780382   | 0.031059              | 1.39             | 0.232822              | -1.38            | 0.057620              | -1.38            |
| PTK7         | inactive tyrosine-protein kinase 7 isoform X1                  | 4 127415088 127498524  | 0.031059              | 1.27             | 0.440094              | -1.17            | 0.300790              | 1.15             |
| CFAP61       | cilia- and flagella-associated protein 61 isoform X1           | 10 41925618 42212293   | 0.031088              | 2.85             | 0.912161              | -1.18            | 0.462644              | -1.62            |
| PCLO         | protein piccolo isoform X1                                     | 3 128932708 129333839  | 0.031169              | 3.40             | 0.510870              | 1.99             | 0.010523              | 4.48             |
| CAMK1D       | calcium/calmodulin-dependent protein kinase 1 delta            | 9 12810151 13300454    | 0.031169              | 1.49             | 0.926890              | -1.05            | 0.768168              | -1.08            |
| PTBP2        | polypyrimidine tract-binding protein 2 isoform X1              | 1 130076511 130168805  | 0.031169              | -1.57            | 0.671579              | 1.21             | 0.642531              | -1.14            |
| CXHXorf23    | uncharacterized protein CXorf23 homolog                        | X 17820944 17870234    | 0.031208              | -1.29            | 0.754553              | 1.09             | 0.948266              | 1.01             |
| ENPP1        | ectonucleotide pyrophosphatase/phosphodiesterase 1             | 4 35980298 36060971    | 0.031315              | -1.91            | 0.081023              | 2.31             | 0.897158              | -1.06            |
| PACRG        | parkin coregulated gene protein isoform X1                     | 4 7611757 8187927      | 0.031344              | 3.52             | 0.360379              | 2.90             | 0.278711              | -2.25            |
| SPATS2L      | SPATS2-like protein isoform X2                                 | 12 89511632 89679907   | 0.031344              | -1.15            | 0.025220              | 1.25             | 0.415815              | 1.07             |
| ADAL         | adenosine deaminase-like protein isoform X1                    | 7 20315880 20344605    | 0.031344              | -1.30            | 0.924840              | 1.03             | 0.471239              | -1.12            |
| TTL6         | tubulin polyglutamylase TTL6 isoform X1                        | 16 34123422 34173039   | 0.031365              | 6.18             | 0.754553              | -1.86            | 0.215272              | -3.66            |
| NAV3         | neuron navigator 3 isoform X6                                  | 11 76774791 77416767   | 0.031365              | 1.57             | 0.596937              | -1.25            | 0.039541              | 1.58             |
| LOC102126003 | succinate dehydrogenase [ubiquinone] flavin subunit SDHB       | 6 154 8836             | 0.031365              | 1.21             | 0.389580              | -1.15            | 0.287609              | -1.12            |
| FOXN2        | forkhead box protein N2                                        | 13 61903124 61933038   | 0.031365              | -1.65            | 0.141146              | 1.78             | 0.235866              | 1.40             |
| LOC102146524 | serine/threonine-protein kinase/endoribonuclease 1             | 20 22629833 22640932   | 0.031385              | 5.67             | 0.762774              | -1.76            | 0.697533              | -1.49            |
| LRRC47       | leucine-rich repeat-containing protein 47                      | 1 224666139 224682044  | 0.031474              | 1.20             | 0.711897              | -1.07            | 0.618486              | -1.06            |
| PTEN         | phosphatidylinositol 3,4,5-trisphosphate 3-phosphatase         | 9 86418209 86518800    | 0.031474              | -1.38            | 0.385542              | 1.27             | 0.222323              | 1.25             |
| TP53RK       | uncharacterized protein LOC101865330                           | 10 78377231 78380146   | 0.031485              | -1.35            | 0.766087              | 1.10             | 0.889805              | -1.03            |
| CEMP1        | cell migration-inducing and hyaluronan-binding protein 1       | 7 59373296 59449044    | 0.031601              | -2.27            | 0.561398              | -1.57            | 0.970631              | 1.02             |
| LRRC43       | leucine-rich repeat-containing protein 43 isoform X1           | 11 126387055 126409405 | 0.031684              | 2.01             | 0.668957              | -1.38            | 0.740234              | -1.17            |
| VPS50        | syndetin                                                       | 3 118617697 118735131  | 0.031758              | -1.29            | 0.173609              | 1.31             | 0.394589              | 1.13             |
| PDE12        | 2',5'-phosphodiesterase 12 isoform X2                          | 2 112871067 112880133  | 0.031781              | -1.70            | 0.314120              | 1.57             | 0.886510              | 1.05             |
| KIT          | mast/stem cell growth factor receptor Kit                      | 5 79750428 79839821    | 0.031788              | 2.38             | 0.559823              | 1.61             | 0.201183              | 1.86             |
| LOC102134848 | uncharacterized protein LOC102134848                           | 14 32299132 32302778   | 0.031813              | -2.64            | 0.273731              | -2.48            | 0.422753              | -1.60            |
| MAP7D3       | MAP7 domain-containing protein 3 isoform X1                    | X 132991841 133024166  | 0.031894              | 1.29             | 0.876217              | 1.05             | 0.384458              | 1.14             |
| ERO1B        | ERO1-like protein beta isoform X1                              | 1 13180415 13246282    | 0.031894              | -1.32            | 0.176558              | 1.34             | 0.428173              | 1.14             |
| C2CD4C       | C2 calcium-dependent domain-containing protein 4               | 19 143451 145484       | 0.031894              | -2.27            | 0.579401              | -1.60            | 0.005738              | 3.15             |
| APOBEC3B     | LOW QUALITY PROTEIN: DNA dC->dU deaminase 3B                   | 10 12227596 12237960   | 0.031894              | -2.31            | 0.551390              | -1.60            | 0.927851              | -1.06            |
| FRRS1        | ferric-chelate reductase 1                                     | 1 127101055 127142950  | 0.031965              | -1.37            | 0.747199              | 1.11             | 0.229821              | 1.24             |
| LOC102119459 | liprin-beta-1 isoform X1                                       | 11 28284138 28381187   | 0.032052              | 1.40             | 0.039842              | 1.65             | 0.711820              | 1.08             |
| CHRNE        | acetylcholine receptor subunit epsilon isoform X1              | 16 4956126 4977935     | 0.032078              | -1.91            | 0.076493              | -2.32            | 0.814219              | -1.10            |
| PRDX5        | peroxiredoxin-5, mitochondrial isoform X1                      | 14 10228299 10232514   | 0.032099              | -1.29            | 0.993918              | 1.00             | 0.009188              | -1.38            |
| MARK4        | MAP/microtubule affinity-regulating kinase 4                   | 19 46029274 46081765   | 0.032132              | 1.23             | 0.587096              | -1.11            | 0.959218              | -1.01            |
| ZNF256       | zinc finger protein 256 isoform X2                             | 19 58540803 58546839   | 0.032300              | 1.35             | 0.432985              | -1.23            | 0.871016              | -1.03            |
| LOC102136025 | 60S ribosomal protein L39                                      | 10 8441389 8441544     | 0.032367              | 3.40             | 0.711576              | -1.59            | 0.450982              | -1.68            |
| LOC107129116 | uncharacterized protein LOC107129116                           | 3 45639284 45641124    | 0.032394              | -1.49            | 0.486457              | -1.29            | 0.505954              | 1.17             |
| TMEM189      | uncharacterized protein LOC101866901                           | 10 81930356 81959897   | 0.032401              | -1.37            | 0.723506              | 1.13             | 0.296251              | -1.21            |
| VAT1L        | synaptic vesicle membrane protein VAT-1                        | 20 66049924 66240802   | 0.032448              | 3.05             | 0.124286              | 3.77             | 0.493383              | -1.57            |
| CELSR1       | cadherin EGF LAG seven-pass G-type receptor 1                  | 10 4389461 4576375     | 0.032448              | 1.50             | 0.602828              | -1.22            | 0.829031              | -1.06            |
| DAD1         | dolichyl-diphosphooligosaccharide-protein transferase 1        | 7 86252712 86265801    | 0.032448              | -1.26            | 0.828139              | -1.06            | 0.848190              | -1.03            |
| FCRL4        | Fc receptor-like protein 4                                     | 1 94123036 94146200    | 0.032576              | 4.80             | 0.686938              | -1.92            | 0.965303              | -1.05            |
| NDUFC2       | NADH dehydrogenase [ubiquinone] 1 subunit ND6                  | 14 73413942 73423910   | 0.032601              | -1.28            | 0.864138              | -1.05            | 0.868452              | -1.03            |
| SPECC1L      | cytospin-A isoform X6                                          | 10 27630612 27739252   | 0.032705              | 1.34             | 0.991033              | 1.00             | 0.920994              | -1.02            |
| DZIP1        | zinc finger protein DZIP1 isoform X8                           | 17 78229926 78289859   | 0.032748              | 1.41             | 0.342041              | 1.32             | 0.027171              | 1.46             |
| AMDHD1       | probable imidazolepropiolnase                                  | 11 99640576 99662951   | 0.032759              | -2.36            | 0.987179              | -1.02            | 0.811811              | 1.15             |
| CCDC33       | coiled-coil domain-containing protein 33                       | 7 52259976 52362200    | 0.032779              | 4.30             | 0.740112              | -1.76            | 0.337462              | -2.33            |
| SERTAD2      | SERTA domain-containing protein 2 isoform X1                   | 13 45332750 45366360   | 0.032779              | -1.18            | 0.578287              | -1.09            | 0.151867              | 1.14             |
| CD163        | scavenger receptor cysteine-rich type 1 protein MRC1           | 11 7900625 7926664     | 0.032779              | -2.11            | 0.999136              | 1.00             | 0.590712              | 1.28             |
| CCDC74B      | LOW QUALITY PROTEIN: coiled-coil domain-containing protein 74B | 12 1447068 1452970     | 0.032810              | 3.52             | 0.578287              | -1.99            | 0.607043              | -1.50            |
| ATP8B1       | phospholipid-transporting ATPase 1C isoform X1                 | 18 22840184 22925522   | 0.032826              | 1.43             | 0.735662              | -1.14            | 0.054009              | 1.44             |
| CHP2         | calcineurin B homologous protein 2                             | 20 22681211 22683739   | 0.032849              | 8.90             | 0.391542              | -5.80            | 0.338252              | -3.48            |
| FKBP1A       | peptidyl-prolyl cis-trans isomerase FKBP1                      | 10 61207040 61230348   | 0.032888              | -1.21            | 0.629697              | 1.09             | 0.304623              | -1.12            |
| NPL          | N-acetylneuraminidase lyase isoform X2                         | 1 40728199 40762829    | 0.032888              | -1.77            | 0.520208              | -1.41            | 0.855638              | -1.07            |
| SRSF11       | serine/arginine-rich splicing factor 11 isoform X1             | 1 157097926 157127021  | 0.032947              | -1.42            | 0.621446              | 1.18             | 0.999078              | 1.00             |
| FAM101B      | filamin-interacting protein FAM101B                            | 16 310983 318364       | 0.032960              | 1.69             | 0.797882              | -1.16            | 0.418073              | 1.29             |
| SCAMP1       | secretory carrier-associated membrane protein 1                | 6 76672288 76789840    | 0.032960              | -1.66            | 0.149512              | 1.78             | 0.574223              | 1.19             |
| LOC102137199 | putative pregnancy-specific beta-1-glycoprotein 1              | 19 43276085 43289933   | 0.032960              | -12.05           | 0.397987              | 5.62             | 0.665213              | 1.83             |
| LOC102121426 | uncharacterized protein LOC102121426                           | 15 110323517 110324971 | 0.032993              | 4.52             | 0.986887              | -1.06            | 0.829256              | -1.28            |
| LOC102125415 | uncharacterized protein LOC102125415                           | 15 80495183 80499827   | 0.032993              | -1.68            | 0.356989              | 1.52             | 0.977740              | 1.01             |
| STAG3        | cohesin subunit SA-3 isoform X1                                | 3 44552595 44589416    | 0.033088              | 1.79             | 0.471328              | -1.40            | 0.896114              | -1.05            |
| LOC107127532 | uncharacterized protein LOC107127532                           | 1 9744917 9770779      | 0.033247              | 10.52            | 1.000000              | 3.49             | 0.247842              | 3.68             |
| POMP         | uncharacterized protein LOC101925586                           | 17 8393756 8411723     | 0.033247              | -1.33            | 0.623043              | 1.15             | 0.643441              | 1.09             |
| ZNF337       | zinc finger protein 337 isoform X1                             | 10 36652321 36665833   | 0.033390              | -1.50            | 0.044879              | 1.81             | 0.006454              | -1.71            |



| Gene symbol  | Gene name                                     | chr_start_end          | Day3 adjusted P-value | Day3 fold change | Day5 adjusted P-value | Day5 fold change | Day7 adjusted P-value | Day7 fold change |
|--------------|-----------------------------------------------|------------------------|-----------------------|------------------|-----------------------|------------------|-----------------------|------------------|
| CD200R1      | cell surface glycoprotein CD200 receptor      | 2 159275051 159309643  | 0.033453              | -1.77            | 0.919050              | -1.08            | 0.136268              | 1.60             |
| LOC102131021 |                                               | 14 22606197 22612594   | 0.033463              | 9.36             | 1.000000              | -1.32            | 1.000000              | -9.30            |
| FILIP1       | filamin-A-interacting protein 1 isoform X1    | 4 98531381 98701866    | 0.033489              | 1.42             | 0.458440              | 1.26             | 0.130825              | 1.33             |
| MCOLN3       | mucoilin-3 isoform X1                         | 1 142204911 142232005  | 0.033544              | -1.60            | 0.039848              | -1.99            | 0.472446              | -1.22            |
| KBTBD4       | kelch repeat and BTB domain-containing        | 14 19957069 19962447   | 0.033636              | 1.24             | 0.603762              | -1.12            | 0.362272              | 1.12             |
| TCEAL8       | transcription elongation factor A protein-L   | X 100083796 100084149  | 0.033636              | -1.18            | 0.879354              | -1.03            | 0.148845              | 1.14             |
| ATP6V0E1     | V-type proton ATPase subunit e 1              | 6 172627665 172665751  | 0.033705              | -1.18            | 0.857363              | 1.04             | 0.473621              | -1.07            |
| GTF2A2       | transcription initiation factor IIA subunit 2 | 7 36839613 36852187    | 0.033769              | -1.30            | 0.198615              | 1.31             | 0.768224              | 1.05             |
| RP1          | oxygen-regulated protein 1 isoform X1         | 8 55647560 55656896    | 0.033868              | 3.80             | 0.754274              | -1.67            | 0.737563              | 1.35             |
| MAP3K11      | mitogen-activated protein kinase kinase ki    | 14 8872155 8888135     | 0.033868              | 1.21             | 0.953154              | 1.02             | 0.364968              | -1.11            |
| DNAH6        | dynein heavy chain 6, axonemal isoform 2      | 13 24650120 24975158   | 0.033870              | 2.44             | 0.533725              | -1.72            | 0.641477              | -1.30            |
| TOM1L2       | TOM1-like protein 2 isoform X4                | 16 18173192 18301577   | 0.033870              | 1.33             | 0.871307              | -1.06            | 0.808154              | 1.05             |
| PRR29        | proline-rich protein 29                       | 16 61327863 61330852   | 0.033979              | 3.75             | 0.892366              | -1.27            | 0.332791              | -2.17            |
| DPEP2        | dipeptidase 2                                 | 20 56192253 56198770   | 0.034017              | 1.50             | 0.832759              | -1.10            | 0.096547              | -1.44            |
| PLD6         | mitochondrial cardiolipin hydrolase           | 16 17515348 17519164   | 0.034051              | -1.66            | 0.887889              | -1.09            | 0.127038              | -1.54            |
| SLC25A16     | graves disease carrier protein                | 9 67430223 67475642    | 0.034055              | -1.36            | 0.882966              | -1.06            | 0.927851              | -1.02            |
| LOC107126387 | olfactory receptor 2L8-like                   | 1 1117289 1118227      | 0.034078              | 4.32             | 0.626086              | 2.08             | 0.117233              | -3.81            |
| TCF20        | transcription factor 20 isoform X3            | 10 8848285 8904427     | 0.034093              | 1.20             | 0.710056              | -1.07            | 0.529235              | 1.07             |
| SAT1         | diamine acetyltransferase 1 isoform X1        | X 21738477 21740994    | 0.034093              | -1.40            | 0.384721              | -1.30            | 0.068356              | -1.39            |
| LOC102129943 | intraflagellar transport protein 122 homolog  | 11 87625786 87724980   | 0.034366              | 1.29             | 0.827976              | -1.07            | 0.156559              | -1.23            |
| LAX1         | lymphocyte transmembrane adapter 1 isoform    | 1 62236566 62246995    | 0.034390              | 1.86             | 0.851380              | -1.14            | 0.117250              | 1.66             |
| ABCB10       | ATP-binding cassette sub-family B member      | 1 20023132 20064842    | 0.034390              | -1.38            | 0.221333              | 1.38             | 0.224665              | 1.25             |
| ROPN1L       | roporin-1-like protein                        | 6 10547728 10567568    | 0.034460              | 4.55             | 0.981655              | -1.06            | 0.670483              | -1.54            |
| LOC102137881 | Ig kappa chain V-II region Cum-like           | 13 17753550 17754386   | 0.034460              | 3.12             | 0.083071              | 4.56             | 0.657765              | 1.36             |
| LOC102122907 | adhesion G-protein coupled receptor G5-1      | 20 1954 5254           | 0.034460              | 2.08             | 0.475106              | -1.59            | 0.679130              | 1.21             |
| KDR          | vascular endothelial growth factor recepto    | 5 79361776 79408044    | 0.034460              | 1.63             | 0.008759              | 2.40             | 0.288170              | 1.35             |
| GPR155       | integral membrane protein GPR155 isoform      | 12 63368767 63411943   | 0.034460              | 1.48             | 0.940256              | 1.04             | 0.278434              | 1.28             |
| GPATCH2      | G patch domain-containing protein 2 isoform   | 1 76080931 76279508    | 0.034460              | -1.33            | 0.644203              | 1.14             | 0.409128              | 1.15             |
| RAP1A        | ras-related protein Rap-1A isoform X1         | 1 115073156 115154569  | 0.034460              | -1.41            | 0.451555              | 1.26             | 0.639958              | 1.11             |
| NUP58        | nucleoporin p58/p45 isoform X3                | 17 5282764 5333258     | 0.034524              | -1.45            | 0.577449              | 1.22             | 0.647685              | 1.11             |
| THRA         | uncharacterized protein LOC101865809          | 16 51697760 51717964   | 0.034553              | 1.41             | 0.904543              | 1.05             | 0.888550              | 1.03             |
| DPH3         | DPH3 homolog isoform X1                       | 2 31312186 31316252    | 0.034553              | -1.39            | 0.626264              | 1.17             | 0.634810              | -1.10            |
| FEZ2         | fasciculation and elongation protein zeta-2   | 13 74030847 74158071   | 0.034560              | -1.36            | 0.494657              | 1.22             | 0.802997              | 1.05             |
| LOC102137388 | uncharacterized protein LOC102137388 i        | 14 36095560 36552535   | 0.034612              | 3.50             | 0.975456              | -1.06            | 0.328273              | -2.13            |
| IGFL3        | insulin growth factor-like family member      | 19 46939538 46943833   | 0.034612              | 1.78             | 0.490438              | -1.44            | 0.023991              | -1.94            |
| PDPFR        | pyruvate dehydrogenase phosphatase regu       | 20 62489228 62527249   | 0.034612              | 1.51             | 0.760313              | 1.15             | 0.033849              | 1.57             |
| AP2S1        | AP-2 complex subunit sigma isoform X1         | 19 47596482 47607332   | 0.034626              | -1.49            | 0.598308              | -1.22            | 0.677657              | -1.11            |
| ZNF239       | zinc finger protein 239 isoform X3            | 9 42195752 42213034    | 0.034640              | -1.64            | 0.220771              | 1.65             | 0.666630              | -1.06            |
| LOC101865481 | vascular non-inflammatory molecule 2          | 4 36912809 36926982    | 0.034678              | 4.57             | 0.716070              | 1.80             | 0.935033              | 1.10             |
| TMEM62       | transmembrane protein 62 isoform X1           | 7 20123974 20170318    | 0.034837              | -1.36            | 0.215962              | -1.36            | 0.672291              | 1.08             |
| DRD5         | D(1B) dopamine receptor                       | 5 8866118 8867554      | 0.034883              | 4.21             | 0.977658              | -1.06            | 0.301013              | -2.32            |
| SERTM1       | serine-rich and transmembrane domain-co       | 17 16099562 16120793   | 0.034891              | -1.93            | 0.425946              | -1.57            | 0.973338              | 1.02             |
| CADM2        | cell adhesion molecule 2 isoform X2           | 2 182072835 183145623  | 0.034891              | -3.87            | 0.003486              | 16.60            | 0.703160              | -1.39            |
| SKA2         | spindle and kinetochore-associated protein    | 16 44662085 44702027   | 0.034944              | -1.34            | 0.447730              | 1.22             | 0.177865              | 1.25             |
| LOC102131206 |                                               | 2 192192437 192238181  | 0.035002              | -7.17            | 1.000000              | -4.28            | 0.222760              | 4.61             |
| KHK          | ketohexokinase isoform X4                     | 13 83776493 83789764   | 0.035022              | 1.61             | 0.174926              | 1.70             | 0.416879              | -1.26            |
| LOC102143204 | mitochondrial import inner membrane tra       | 9 45073233 45104579    | 0.035086              | -1.22            | 0.077260              | -1.30            | 0.669290              | -1.06            |
| CSMD1        | CUB and sushi domain-containing protein       | 8 3117930 5161872      | 0.035171              | 3.20             | 0.978877              | 1.05             | 0.109846              | -2.84            |
| OLFML1       | olfactomedin-like protein 1                   | 14 60388021 60412390   | 0.035283              | 1.47             | 0.352169              | 1.36             | 0.786694              | 1.07             |
| ITGB7        | integrin beta-7 isoform X1                    | 11 52046201 52055685   | 0.035344              | 1.54             | 0.774694              | -1.15            | 0.416031              | 1.23             |
| UBE2K        | uncharacterized protein LOC101865827          | 5 39357597 39440045    | 0.035344              | -1.29            | 0.382037              | 1.22             | 0.777226              | 1.05             |
| PIGB         | GPI mannosyltransferase 3                     | 7 32410751 32447877    | 0.035355              | -1.21            | 0.785607              | 1.06             | 0.056245              | 1.21             |
| ZNF586       | zinc finger protein 586 isoform X2            | 19 58426193 58435383   | 0.035364              | 1.18             | 0.946611              | 1.02             | 0.433230              | 1.08             |
| GRIK3        | glutamate receptor ionotropic, kainate 3      | 1 190924514 191013898  | 0.035386              | 12.38            | 1.000000              | -3.89            | 0.977055              | -1.06            |
| ARL6IP5      | PRA1 family protein 3                         | 2 124737652 124757519  | 0.035386              | -1.37            | 0.369856              | 1.28             | 0.422485              | 1.16             |
| LOC102128706 |                                               | 7 10719 20141          | 0.035401              | 1.87             | 0.237020              | -1.85            | 0.238510              | 1.53             |
| GPATCH8      | G patch domain-containing protein 8 isoform   | 16 56194472 56301310   | 0.035405              | 1.18             | 0.807069              | 1.03             | 0.622541              | 1.05             |
| LOC102134962 | double-headed protease inhibitor, subman      | 6 147388467 147393274  | 0.035443              | 6.95             | 0.982409              | -1.08            | 0.758597              | -1.56            |
| SYT8         | synaptotagmin-8 isoform X2                    | 14 1805063 1807311     | 0.035497              | -1.58            | 0.078378              | -1.83            | 0.725898              | 1.11             |
| ROBO4        | roundabout homolog 4                          | 14 120680078 120693027 | 0.035594              | 1.49             | 0.537340              | 1.27             | 0.885838              | -1.04            |
| APPBP2       | amyloid protein-binding protein 2 isoform     | 16 47374637 47450748   | 0.035661              | -1.30            | 0.302541              | 1.26             | 0.877113              | 1.03             |
| RNF24        | RING finger protein 24 isoform X2             | 10 58494842 58542250   | 0.035685              | 1.52             | 0.990354              | 1.01             | 0.583858              | 1.16             |
| FAM71E1      | LOW QUALITY PROTEIN: protein FAM              | 19 51305437 51312003   | 0.035802              | -1.93            | 0.214990              | -1.98            | 0.692538              | -1.18            |
| TAPBP1       | tapasin-related protein isoform X1            | 11 6711731 6721954     | 0.036074              | 1.22             | 0.953452              | 1.02             | 0.232642              | 1.15             |
| LOC102137293 | uncharacterized protein LOC102137293          | 1 188254948 188287072  | 0.036081              | 2.78             | 0.987051              | 1.02             | 0.287784              | 1.89             |
| TBC1D1       | TBC1 domain family member 1 isoform 2         | 5 37521481 37769984    | 0.036297              | 1.20             | 0.837684              | -1.05            | 0.460069              | 1.09             |
| NHLRC2       | NHL repeat-containing protein 2 isoform       | 9 113030077 113098408  | 0.036307              | -1.17            | 0.006243              | 1.35             | 0.641584              | 1.05             |
| ISLR2        | immunoglobulin superfamily containing l       | 7 52153174 52156928    | 0.036330              | 1.78             | 0.673014              | -1.26            | 0.336461              | 1.36             |
| LOC102116157 |                                               | 6 97506596 97549160    | 0.036515              | -1.76            | 0.242540              | 1.78             | 0.787920              | 1.11             |
| NR2C1        | nuclear receptor subfamily 2 group C mem      | 11 98739355 98783969   | 0.036563              | -1.39            | 0.960479              | -1.02            | 0.420749              | 1.17             |
| EFNB3        | ephrin-B3 isoform X2                          | 16 7790494 7794459     | 0.036587              | 2.20             | 0.799483              | -1.25            | 0.080535              | -1.88            |
| MUSK         | muscle, skeletal receptor tyrosine-protein    | 15 26854481 26984827   | 0.036587              | 2.11             | 0.433789              | -2.03            | 0.799959              | 1.18             |
| CCL22        | C-C motif chemokine 22                        | 20 45381563 45389170   | 0.036593              | 2.27             | 0.575445              | -1.56            | 0.774909              | -1.17            |
| RASSF3       | ras association domain-containing protein     | 11 63641601 63724537   | 0.036646              | 1.28             | 0.271883              | 1.26             | 0.009373              | 1.38             |
| GOLT1B       | vesicle transport protein GOT1B isoform       | 11 22219026 22232759   | 0.036685              | -2.00            | 0.427629              | 1.64             | 0.566968              | 1.28             |
| CDCA4        | cell division cycle-associated protein 4 iso  | 7 170385073 170394538  | 0.036711              | -1.40            | 0.725487              | -1.13            | 0.863652              | -1.04            |
| LRRC69       | leucine-rich repeat-containing protein 69     | 8 92294200 92377699    | 0.036711              | -1.85            | 0.985802              | 1.02             | 0.728621              | -1.15            |
| DTD2         | probable D-tyrosyl-tRNA(Tyr) deacylase        | 7 95369677 95379514    | 0.036791              | -1.44            | 0.240647              | -1.43            | 0.590651              | 1.13             |
| ZNF320       | zinc finger protein 320                       | 19 53582440 53592767   | 0.036824              | -1.31            | 0.006930              | 1.67             | 0.830033              | 1.04             |
| KPNA3        | importin subunit alpha-4                      | 17 28914954 29012290   | 0.036824              | -1.39            | 0.329312              | 1.32             | 0.423865              | 1.17             |
| BCOR         | BCL-6 corepressor isoform X5                  | X 38256961 38284993    | 0.036856              | 1.36             | 0.649108              | 1.15             | 0.074775              | 1.34             |
| USP19        | ubiquitin carboxyl-terminal hydrolase 19      | 2 104273982 104284671  | 0.036856              | 1.19             | 0.644155              | -1.09            | 0.866630              | 1.02             |
| EML3         | echinoderm microtubule-associated protei      | 14 11660899 11671199   | 0.036937              | 1.22             | 0.581528              | -1.11            | 0.624738              | -1.06            |
| ETFA         | electron transfer flavoprotein subunit alph   | 7 54483017 54584691    | 0.037245              | -1.25            | 0.861920              | 1.05             | 0.557043              | 1.09             |
| FCHO2        | F-BAR domain only protein 2                   | 6 71112797 71258699    | 0.037245              | -1.38            | 0.055749              | 1.59             | 0.160740              | 1.29             |
| KLK11        | kallikrein-11                                 | 19 51860560 51865520   | 0.037314              | 5.47             | 0.522503              | 2.72             | 0.678291              | -1.54            |
| RBM25        | RNA-binding protein 25                        | 7 137747002 137802702  | 0.037314              | -1.31            | 0.484776              | 1.19             | 0.700692              | 1.07             |

| Gene symbol  | Gene name                                    | chr_start_end          | Day3 adjusted P-value | Day3 fold change | Day5 adjusted P-value | Day5 fold change | Day7 adjusted P-value | Day7 fold change |
|--------------|----------------------------------------------|------------------------|-----------------------|------------------|-----------------------|------------------|-----------------------|------------------|
| ENPP4        | bis(5'-adenosyl)-triphosphatase ENPP4        | 4 124379087 124382973  | 0.037325              | -1.64            | 0.087214              | 1.91             | 0.657119              | 1.15             |
| ALDH3A1      | aldehyde dehydrogenase, dimeric NADP-        | 16 19708508 19715936   | 0.037335              | 2.48             | 0.265883              | 2.37             | 0.806601              | -1.17            |
| AMOTL1       | angiomin-like protein 1 isoform X1           | 14 90576347 90722021   | 0.037498              | 1.49             | 0.186701              | 1.54             | 0.731564              | 1.09             |
| ZNF221       | zinc finger protein 221                      | 19 44697219 44701776   | 0.037517              | 1.43             | 0.922460              | 1.05             | 0.991166              | 1.00             |
| RPA3         | replication protein A 14 kDa subunit isofo   | 3 113445588 113448788  | 0.037558              | -1.36            | 0.601994              | 1.17             | 0.693697              | 1.08             |
| LOC102126271 | Ig heavy chain V-III region GAL-like         | 0 482220 483688        | 0.037582              | 3.48             | 0.973594              | 1.06             | 0.285048              | 2.14             |
| TCFET1       | T-complex-associated testis-expressed pro    | 4 126234130 126242069  | 0.037587              | 6.44             | 0.390165              | -7.62            | 0.715528              | 1.59             |
| TNFRSF13C    | tumor necrosis factor receptor superfamily   | 10 9146425 9148144     | 0.037587              | 3.38             | 0.973972              | -1.06            | 0.700817              | 1.36             |
| GDF7         | growth/differentiation factor 7              | 13 90307522 90316881   | 0.037587              | 2.21             | 0.678861              | 1.43             | 0.791440              | -1.16            |
| OLA1         | obg-like ATPase 1 isoform X1                 | 12 63016278 63187405   | 0.037587              | -1.31            | 0.726018              | -1.11            | 0.416031              | 1.14             |
| TBC1D23      | TBC1 domain family member 23 isoform         | 2 171819745 171883489  | 0.037587              | -1.41            | 0.204363              | 1.43             | 0.501226              | 1.15             |
| PPP1R2       | protein phosphatase inhibitor 2              | 2 2000430 2026684      | 0.037587              | -1.52            | 0.139088              | 1.65             | 0.505540              | 1.19             |
| OTUD5        | OTU domain-containing protein 5 isoform      | X 47452155 47489519    | 0.037714              | 1.15             | 0.247031              | -1.14            | 0.343591              | -1.08            |
| DNAJC28      | dnaJ homolog subfamily C member 28 iso       | 3 13265627 13269229    | 0.037717              | -1.36            | 0.345984              | 1.29             | 0.806828              | 1.05             |
| LOC102130517 | histone H3.3-like                            | 1 21840437 21840847    | 0.037717              | -1.38            | 0.981215              | -1.01            | 0.808987              | -1.06            |
| TCERG1L      | transcription elongation regulator 1-like p  | 9 130517222 130699887  | 0.038024              | 12.54            | 1.000000              | -3.17            | 1.000000              | 1.31             |
| LOC107128699 |                                              | 0 12092 14841          | 0.038024              | 3.26             | 0.909577              | -1.19            | 0.354330              | -1.84            |
| THAP2        | THAP domain-containing protein 2 isofo       | 11 70731337 70744409   | 0.038054              | -1.34            | 0.390027              | 1.25             | 0.259691              | -1.21            |
| RASGEF1A     | ras-GEF domain-containing family memb        | 9 41800679 41833086    | 0.038078              | -1.33            | 0.882966              | -1.05            | 0.829262              | 1.04             |
| ZNF317       | zinc finger protein 317 isoform X1           | 19 9443904 9449628     | 0.038138              | 1.24             | 0.649778              | -1.11            | 0.566052              | 1.08             |
| ATP6V1D      | V-type proton ATPase subunit D               | 7 131849414 131869185  | 0.038138              | -1.37            | 0.628935              | -1.17            | 0.708398              | -1.08            |
| LOC107129630 | LOW QUALITY PROTEIN: beta-1,3-gal            | 4 160210071 160238141  | 0.038138              | -2.43            | 0.873914              | 1.25             | 0.276774              | -1.95            |
| ADRA2A       | alpha-2A adrenergic receptor                 | 9 110272204 110273687  | 0.038187              | 2.19             | 0.177166              | -2.42            | 0.322767              | -1.59            |
| SLC7A8       | large neutral amino acids transporter smal   | 7 86836143 86894938    | 0.038203              | -2.17            | 0.890126              | -1.14            | 0.952588              | -1.04            |
| LOC107127902 | serine/threonine-protein kinase LATS2-lik    | 17 679107 679385       | 0.038205              | -1.25            | 0.057509              | 1.38             | 0.119026              | -1.22            |
| CLPB         | caseinolytic peptidase B protein homolog     | 14 67458966 67608089   | 0.038330              | -1.33            | 0.405515              | -1.24            | 0.525053              | -1.12            |
| ETV1         | ets variant 1                                | 3 106782257 106876611  | 0.038439              | 1.58             | 0.974592              | 1.02             | 0.026212              | 1.70             |
| ABIL1        | abl interactor 1 isoform X16                 | 9 27210583 27326101    | 0.038511              | -1.50            | 0.706686              | 1.17             | 0.638124              | 1.13             |
| MTHFD2L      | probable bifunctional methylenetetrahydro    | 5 60177971 60318165    | 0.038540              | -1.49            | 0.412079              | 1.34             | 0.299427              | -1.28            |
| KCTD12       | BTB/POZ domain-containing protein KC         | 17 59394061 59395038   | 0.038540              | -1.94            | 0.360293              | 1.71             | 0.410055              | 1.39             |
| ZNF750       | zinc finger protein 750                      | 16 80526974 80529286   | 0.038601              | 1.60             | 0.169943              | -1.65            | 0.535309              | -1.19            |
| PMS2         | mismatch repair endonuclease PMS2            | 3 41235968 41279742    | 0.038601              | 1.25             | 0.077817              | -1.35            | 0.884628              | 1.02             |
| AMACR        | alpha-methylacyl-CoA racemase isoform        | 6 34720668 34742674    | 0.038601              | -1.20            | 0.000000              | -1.79            | 0.268991              | -1.13            |
| DHDH         | trans-1,2-dihydrobenzene-1,2-diol dehydr     | 19 49764770 49774307   | 0.038602              | -1.97            | 0.307262              | -1.84            | 0.275575              | 1.56             |
| ORC4         | origin recognition complex subunit 4 isofo   | 12 36465965 36552880   | 0.038606              | -1.33            | 0.935150              | -1.03            | 0.640056              | 1.09             |
| SHOX2        | short stature homeobox protein 2             | 2 60475544 60483558    | 0.038606              | -2.58            | 0.057878              | -4.27            | 0.300440              | -2.14            |
| SLC30A3      | zinc transporter 3 isoform X3                | 13 83583894 83605835   | 0.038612              | 2.29             | 0.199566              | -2.30            | 0.187486              | -1.85            |
| WNT7B        | protein Wnt-7b                               | 10 4995099 5049171     | 0.038612              | 1.92             | 0.365419              | -1.65            | 0.440588              | -1.34            |
| TEAD2        | transcriptional enhancer factor TEF-4 isofo  | 19 50143507 50165006   | 0.038612              | 1.27             | 0.314695              | -1.23            | 0.793487              | -1.04            |
| TMEM60       | transmembrane protein 60                     | 3 134465118 134465519  | 0.038612              | -1.30            | 0.970376              | -1.01            | 0.531446              | 1.11             |
| ARL5B        | ADP-ribosylation factor-like protein 5B      | 9 19242659 19258418    | 0.038612              | -1.59            | 0.722419              | 1.19             | 0.841031              | 1.07             |
| LOC102134172 | coiled-coil domain-containing protein 25-    | 20 60583975 60584751   | 0.038612              | -2.06            | 0.910687              | -1.11            | 0.097086              | -1.87            |
| TAOK1        | serine/threonine-protein kinase TAO1         | 16 25749868 25847291   | 0.038613              | -1.28            | 0.388907              | 1.21             | 0.733130              | 1.06             |
| CRHR2        | corticotropin-releasing factor receptor 2 is | 3 89992789 90022461    | 0.038620              | 5.42             | 0.479256              | 2.35             | 0.217168              | 2.55             |
| RIIAD1       | RiIIa domain-containing protein 1            | 1 100241366 100248827  | 0.038647              | 2.45             | 0.976174              | 1.06             | 0.402902              | -1.63            |
| DHRS1        | dehydrogenase/reductase SDR family mem       | 7 88076167 88084227    | 0.038647              | -1.34            | 0.010061              | -1.69            | 0.021718              | -1.41            |
| COLQ         | acetylcholinesterase collagenic tail peptid  | 2 32062426 32133191    | 0.038711              | 1.98             | 0.773151              | 1.26             | 0.902986              | -1.06            |
| ICOS         | inducible T-cell costimulator                | 12 93482891 93506009   | 0.038714              | 1.75             | 0.179105              | -1.83            | 0.297705              | 1.40             |
| LOC102120902 | translation initiation factor IF-2-like      | 0 1175 2115            | 0.038714              | 1.61             | 0.360958              | 1.50             | 0.509872              | 1.22             |
| EZH1         | histone-lysine N-methyltransferase EZH1      | 16 54457724 54485198   | 0.038714              | 1.48             | 0.928462              | -1.05            | 0.945909              | -1.02            |
| BOD1L1       | biorientation of chromosomes in cell divis   | 5 12651250 12709031    | 0.038714              | 1.29             | 0.972407              | 1.01             | 0.265926              | 1.18             |
| WDR41        | WD repeat-containing protein 41 isoform      | 6 75715881 75890896    | 0.038714              | -1.25            | 0.298254              | -1.22            | 0.369894              | 1.13             |
| SAR1B        | GTP-binding protein SAR1b                    | 6 133663792 133680606  | 0.038714              | -1.30            | 0.225947              | 1.30             | 0.754719              | -1.06            |
| LOC107131042 | Ig lambda chain V-IV region MOL-like is      | 10 28470857 28475725   | 0.038734              | 2.88             | 0.862101              | 1.25             | 0.965303              | -1.03            |
| ANGPTL5      | angiopoietin-related protein 5 isoform X2    | 14 97823057 97841364   | 0.038737              | 7.41             | 1.000000              | 1.56             | 0.580544              | -2.06            |
| SMARCA2      | probable global transcription activator SN   | 15 76984987 77155831   | 0.038825              | 1.35             | 0.473421              | 1.22             | 0.256163              | 1.22             |
| IRF9         | interferon regulatory factor 9 isoform X1    | 7 87942449 87946494    | 0.038835              | 1.36             | 0.009518              | 1.75             | 0.139423              | 1.29             |
| ASCL1        | achaete-scute homolog 1                      | 11 106681421 106682235 | 0.038899              | 6.64             | 0.692383              | -2.66            | 0.952598              | -1.10            |
| PTPRD        | receptor-type tyrosine-protein phosphatase   | 15 70237641 70659416   | 0.038899              | 1.66             | 0.656670              | 1.26             | 0.698949              | 1.14             |
| TMC8         | transmembrane channel-like protein 8 iso     | 16 75503073 75515071   | 0.038899              | 1.39             | 0.049337              | -1.62            | 0.219277              | 1.26             |
| ARSD         | arylsulfatase D                              | X 554836 561846        | 0.038966              | 1.49             | 0.256328              | -1.47            | 0.423916              | -1.22            |
| LOC101925508 |                                              | 1 51593075 51642886    | 0.038983              | 2.26             | 0.369372              | -2.21            | 0.085818              | 2.26             |
| CRACR2B      | EF-hand calcium-binding domain-contain       | 14 655673 658802       | 0.038983              | 2.03             | 0.199811              | 2.13             | 0.222403              | -1.66            |
| LOC102131535 | annexin-2 receptor                           | 6 43588621 43589205    | 0.038983              | 1.86             | 0.453986              | 1.54             | 0.355300              | -1.41            |
| LOC102133400 | uncharacterized protein C12orf76             | 11 113621222 113636958 | 0.038983              | -1.31            | 0.855131              | 1.06             | 0.426690              | -1.14            |
| ZNF831       | zinc finger protein 831                      | 10 91089572 91154799   | 0.039079              | 1.61             | 0.533050              | -1.29            | 0.392339              | 1.24             |
| LOC107127936 |                                              | 17 20391384 20431830   | 0.039081              | 1.71             | 0.174926              | -1.80            | 0.571342              | 1.201            |
| FAM76B       | protein FAM76B isoform X2                    | 14 91649946 91668216   | 0.039081              | -1.53            | 0.321264              | 1.45             | 0.379834              | 1.25             |
| LOC107130289 |                                              | 7 171082083 171086374  | 0.039131              | 2.50             | 0.846379              | -1.24            | 0.580060              | 1.37             |
| NDUF85       | NADH dehydrogenase [ubiquinone] 1 bet        | 2 84109955 84128286    | 0.039141              | -1.23            | 0.735919              | 1.08             | 0.649266              | 1.06             |
| SLC44A2      | choline transporter-like protein 2 isoform   | 19 10922304 10932478   | 0.039206              | 1.38             | 0.978688              | 1.01             | 0.466793              | -1.16            |
| LOC102134826 | HCLS1-associated protein X-1-like            | X 145105415 145106219  | 0.039225              | 1.81             | 0.163397              | -1.93            | 0.000373              | -2.57            |
| GLRX3        | glutaredoxin-3                               | 9 129555414 129599206  | 0.039249              | -1.27            | 0.958714              | -1.02            | 0.974551              | 1.01             |
| RRAGD        | ras-related GTP-binding protein D            | 4 84599700 84620133    | 0.039249              | -1.38            | 0.792670              | 1.10             | 0.416759              | -1.18            |
| LOC107129327 | T-cell receptor beta chain V region CTL-I    | 3 175485086 175485556  | 0.039265              | 5.88             | 0.870138              | 1.26             | 0.727153              | 1.34             |
| ARRB2        | beta-arrestin-2 isoform X3                   | 16 4753084 4763306     | 0.039265              | 1.26             | 0.529060              | -1.15            | 0.390042              | -1.13            |
| CFAP53       | cilia- and flagella-associated protein 53    | 18 31497808 31532575   | 0.039275              | 1.75             | 0.947723              | 1.05             | 0.571853              | -1.22            |
| SCGN         | secretagogin                                 | 4 144871417 144920878  | 0.039429              | 7.24             | 1.000000              | -21.29           | 0.613772              | -1.89            |
| MTCH2        | mitochondrial carrier 2                      | 14 19890056 19917425   | 0.039429              | -1.41            | 0.308296              | -1.36            | 0.584186              | -1.13            |
| CSNK1G3      | casein kinase I isoform gamma-3 isoform      | 6 122473647 122545492  | 0.039429              | -1.44            | 0.309562              | 1.38             | 0.307863              | 1.25             |
| NEB          | nebulin isoform X22                          | 12 40151790 40463188   | 0.039457              | -2.03            | 0.399171              | -1.66            | 0.018727              | -2.22            |
| VMO1         | vitelline membrane outer layer protein 1 h   | 16 4839352 4840334     | 0.039625              | 2.29             | 0.534157              | 1.64             | 0.196768              | -1.86            |
| HDC          | histidine decarboxylase isoform X3           | 7 27218571 27241037    | 0.039642              | 2.68             | 0.712289              | -1.45            | 0.462872              | 1.52             |
| RAB1A        | ras-related protein Rab-1A                   | 13 44861610 44905064   | 0.039642              | -1.36            | 0.366796              | 1.28             | 0.801101              | 1.06             |
| EGR2         | E3 SUMO-protein ligase EGR2 isoform X        | 9 73219781 73225236    | 0.039702              | 1.43             | 0.153118              | 1.51             | 0.474043              | -1.17            |
| OLFM2L2A     | olfactomedin-like protein 2A isoform X1      | 15 11280531 11304991   | 0.039717              | 1.87             | 0.914271              | -1.09            | 0.70216               | 1.13             |
| TNFRSF12A    | tumor necrosis factor receptor superfamily   | 20 3298141 3299572     | 0.039725              | -2.01            | 0.734429              | 1.30             | 0.582030              | -1.28            |

| Gene symbol  | Gene name                                                       | chr_start_end          | Day3 adjusted P-value | Day3 fold change | Day5 adjusted P-value | Day5 fold change | Day7 adjusted P-value | Day7 fold change |
|--------------|-----------------------------------------------------------------|------------------------|-----------------------|------------------|-----------------------|------------------|-----------------------|------------------|
| CBFA2T3      | protein CBFA2T3 isoform X2                                      | 20 77327330 77354477   | 0.039757              | 1.30             | 0.120362              | 1.40             | 0.526031              | 1.11             |
| BCAP29       | B-cell receptor-associated protein 29 isoform X1                | 3 140042601 140099476  | 0.039757              | -1.22            | 0.260924              | 1.21             | 0.430887              | 1.10             |
| ZBTB34       | zinc finger and BTB domain-containing protein 34                | 15 101907544 101924904 | 0.039757              | -1.22            | 0.250918              | 1.22             | 0.453589              | 1.10             |
| FGFR1OP2     | FGFR1 oncogene partner 2 isoform X1                             | 11 27643858 27657774   | 0.039797              | -1.39            | 0.161754              | 1.46             | 0.914278              | 1.03             |
| C2H3orf33    | protein C2orf33 homolog                                         | 2 58193052 58210078    | 0.040002              | -1.47            | 0.981787              | -1.01            | 0.352085              | 1.23             |
| NLN          | neurolysin, mitochondrial isoform X4                            | 6 65540717 65637007    | 0.040025              | -1.28            | 0.736586              | -1.09            | 0.976152              | 1.01             |
| MS4A8        | membrane-spanning 4-domains subfamily 8                         | 14 13559750 13572976   | 0.040039              | 8.60             | 0.909241              | -1.40            | 0.823012              | -1.40            |
| DNAH7        | dynein heavy chain 7, axonemal isoform X1                       | 12 84935583 85279203   | 0.040039              | 2.37             | 0.899803              | -1.16            | 0.677607              | -1.27            |
| SEC61G       | protein transport protein Sec61 subunit gamma                   | 3 65669540 65674611    | 0.040096              | -1.49            | 0.935962              | 1.05             | 0.965302              | -1.01            |
| DCP1B        | mRNA-decapping enzyme 1B isoform X1                             | 11 2087490 2154603     | 0.040149              | 1.20             | 0.723610              | -1.07            | 0.870326              | 1.02             |
| PBX3         | pre-B-cell leukemia transcription factor 3                      | 15 102852509 103079536 | 0.040161              | -1.26            | 0.783896              | -1.07            | 0.995641              | 1.00             |
| PCDH12       | protocadherin beta-2                                            | 6 140226401 140228797  | 0.040180              | 1.93             | 0.485680              | -1.55            | 0.078642              | 1.85             |
| IL31RA       | interleukin-31 receptor subunit alpha                           | 6 55312077 55366544    | 0.040184              | 1.54             | 0.426942              | 1.40             | 0.269832              | -1.34            |
| PHTF2        | putative homeodomain transcription factor 2                     | 3 134304244 134420106  | 0.040185              | -1.68            | 0.589061              | 1.32             | 0.440072              | 1.28             |
| MB           | myoglobin                                                       | 10 15677521 15687693   | 0.040234              | 7.85             | 1.000000              | -4.28            | 0.645272              | -1.63            |
| LOC102135863 |                                                                 | 7 170969385 170974001  | 0.040234              | 3.45             | 0.953504              | -1.12            | 0.973488              | 1.03             |
| PDCD6IP      | programmed cell death 6-interacting protein 1                   | 2 13518644 13591143    | 0.040234              | -1.15            | 0.383373              | 1.12             | 0.911450              | -1.01            |
| LOC102120706 | LOW QUALITY PROTEIN: zinc finger protein 1                      | 3 58032469 58033839    | 0.040259              | -4.06            | 0.760043              | -1.58            | 0.294281              | -2.44            |
| LOC107127399 |                                                                 | 14 72119484 72126364   | 0.040278              | 3.25             | 0.393628              | 2.54             | 0.697643              | 1.37             |
| MYCBPAP      | MYCBP-associated protein isoform X4                             | 16 35908130 35930170   | 0.040278              | 1.86             | 0.277012              | -1.81            | 0.186889              | -1.62            |
| NRK          | nik-related protein kinase isoform X3                           | X 102879446 103017228  | 0.040282              | 2.76             | 0.245392              | 2.70             | 0.503095              | 1.56             |
| CIZ1         | cip1-interacting zinc finger protein isoform X1                 | 15 11019335 11048311   | 0.040325              | 1.20             | 0.491361              | -1.13            | 0.568065              | -1.07            |
| COPS2        | COP9 signalosome complex subunit 2 isoform X1                   | 7 26085345 26114178    | 0.040325              | -1.40            | 0.239462              | 1.40             | 0.506583              | 1.15             |
| AXDN1        | axonemal dynein light chain domain-containing protein 1         | 1 37301836 37513385    | 0.040343              | 2.44             | 0.966616              | -1.06            | 0.329627              | -1.67            |
| TRIM36       | E3 ubiquitin-protein ligase TRIM36 isoform X1                   | 6 113904342 113960778  | 0.040343              | -1.47            | 0.673263              | 1.19             | 0.810939              | 1.07             |
| SCOC         | short coiled-coil protein isoform X1                            | 5 139696388 139739687  | 0.040343              | -1.65            | 0.119918              | 1.87             | 0.210626              | 1.45             |
| COQ3         | ubiquinone biosynthesis O-methyltransferase 3                   | 4 74416969 74441661    | 0.040386              | -1.32            | 0.867365              | 1.06             | 0.989201              | 1.00             |
| CALY         | neuron-specific vesicular protein calycon                       | 9 132814112 132817264  | 0.040397              | 6.04             | 0.820582              | -1.59            | 0.762786              | -1.35            |
| KCMF1        | LOW QUALITY PROTEIN: E3 ubiquitin-protein ligase                | 13 24413058 24495631   | 0.040406              | -1.16            | 0.853695              | 1.04             | 0.984477              | 1.00             |
| LOC102135714 |                                                                 | 6 159926492 159929770  | 0.040424              | -1.67            | 0.384718              | -1.50            | 0.677559              | -1.15            |
| ERP27        | endoplasmic reticulum resident protein 27                       | 11 15543068 15569153   | 0.040460              | 2.23             | 0.854903              | -1.20            | 0.882032              | -1.09            |
| VWA7         | von Willebrand factor A domain-containing protein 7             | 4 139091754 139103180  | 0.040580              | 1.91             | 0.990958              | -1.01            | 0.923819              | 1.05             |
| LOC102122467 |                                                                 | 8 127306699 127349561  | 0.040650              | 1.59             | 0.705940              | -1.20            | 0.660333              | 1.14             |
| FIGNL1       | figletin-like protein 1                                         | 3 70027987 70030011    | 0.040773              | -1.53            | 0.539409              | 1.29             | 0.300348              | 1.30             |
| DSTYK        | dual serine/threonine and tyrosine protein kinase               | 1 63647659 63715342    | 0.040800              | 1.21             | 0.989305              | -1.00            | 0.329694              | 1.12             |
| ZNF207       | BUB3-interacting and GLEBS motif-containing protein 2           | 16 28738053 28761986   | 0.040800              | -1.25            | 0.696236              | 1.10             | 0.321194              | 1.14             |
| LOC102135021 | serpin B4                                                       | 18 16683790 16689047   | 0.041010              | 5.98             | 0.986857              | 1.05             | 0.728621              | 1.52             |
| KIAA1671     | uncharacterized protein KIAA1671 homolog                        | 10 26489973 26662086   | 0.041010              | 1.41             | 0.967140              | 1.02             | 0.341441              | 1.22             |
| DCC          | netrin receptor DCC isoform X4                                  | 18 28119231 29344831   | 0.041156              | 2.68             | 0.007392              | 6.58             | 0.984596              | -1.01            |
| DHX29        | ATP-dependent RNA helicase DHX29 isoform X1                     | 6 54693817 54749081    | 0.041156              | -1.28            | 0.829100              | 1.07             | 0.268000              | 1.17             |
| ALS2CR12     | uncharacterized protein LOC101865203                            | 12 90664935 90721361   | 0.041170              | 2.96             | 0.874242              | -1.27            | 0.367961              | -1.86            |
| IDH3B        | isocitrate dehydrogenase [NAD] subunit beta                     | 10 59848700 59854681   | 0.041170              | 1.32             | 0.318130              | -1.28            | 0.006884              | -1.46            |
| RNASE2       | non-secretory ribonuclease                                      | 7 84490665 84491147    | 0.041170              | -3.78            | 0.443218              | 2.58             | 0.044557              | -4.19            |
| FIGF         | vascular endothelial growth factor D                            | X 13147560 13188314    | 0.041187              | 1.89             | 0.432015              | 1.59             | 0.697590              | 1.18             |
| DICER1       | endoribonuclease Dicer                                          | 7 160168779 160213065  | 0.041187              | -1.39            | 0.234813              | 1.40             | 0.446146              | 1.17             |
| PERM1        | PGC-1 and ERR-induced regulator in muscle                       | 1 227449563 227454266  | 0.041187              | -3.19            | 0.800844              | 1.51             | 0.448482              | 1.93             |
| APIP         | methylthioribulose-1-phosphate dehydratase                      | 14 32510617 32549725   | 0.041293              | -1.18            | 0.459327              | 1.12             | 0.973838              | -1.00            |
| WDR92        | WD repeat-containing protein 92 isoform X1                      | 13 41797526 41823767   | 0.041345              | -1.19            | 0.937119              | 1.02             | 0.738778              | 1.04             |
| EIF4ENIF1    | eukaryotic translation initiation factor 4E1                    | 10 19888187 19944144   | 0.041400              | 1.19             | 0.779882              | 1.06             | 0.989057              | 1.00             |
| CLECL1       | LOW QUALITY PROTEIN: C-type lectin domain class B member 1      | 11 10087074 10103320   | 0.041432              | 1.62             | 0.381324              | -1.46            | 0.937594              | -1.03            |
| NDUF4F6      | NADH dehydrogenase (ubiquinone) complex subunit F6              | 8 96170184 96204842    | 0.041432              | -1.22            | 0.599308              | 1.11             | 0.951616              | -1.01            |
| CPA3         | mast cell carboxypeptidase A                                    | 2 51081743 51113368    | 0.041488              | 2.86             | 0.897619              | 1.19             | 0.126007              | 2.48             |
| CEP135       | centrosomal protein of 135 kDa isoform X1                       | 5 78403432 78505009    | 0.041488              | -1.72            | 0.950700              | -1.05            | 0.563394              | 1.22             |
| CHCHD2       | coiled-coil-helix-coiled-coil-helix domain-containing protein 2 | 3 64136318 64140837    | 0.041499              | -1.25            | 0.903972              | 1.04             | 0.013718              | -1.32            |
| GSG1         | germ cell-specific gene 1 protein isoform X1                    | 11 13687676 13706055   | 0.041499              | -3.93            | 0.337761              | -3.15            | 0.166713              | -3.08            |
| CFAP54       | cilia- and flagella-associated protein 54 isoform X1            | 11 100208715 100583537 | 0.041549              | 3.07             | 0.708144              | -1.63            | 0.984477              | 1.02             |
| TPD52        | tumor protein D52 isoform X3                                    | 8 81169555 81308944    | 0.041549              | -1.43            | 0.335125              | 1.35             | 0.407685              | 1.20             |
| LOC107129663 | splicing factor 3B subunit 4-like                               | 5 10537484 10557967    | 0.041561              | 2.76             | 0.630109              | 1.62             | 0.891780              | 1.10             |
| PHF12        | PHD finger protein 12                                           | 16 25177291 25222901   | 0.041594              | 1.18             | 0.333697              | -1.15            | 0.261457              | 1.12             |
| ITGB6        | integrin beta-6 isoform X1                                      | 12 48838991 48927811   | 0.041594              | -1.77            | 0.690923              | -1.27            | 0.615921              | 1.20             |
| LOC102126168 | LOW QUALITY PROTEIN: chondroitinase                             | 7 56170882 56233731    | 0.041618              | 3.36             | 0.845612              | 1.32             | 0.378202              | 1.75             |
| COMMD3       | COMM domain-containing protein 3                                | 9 22830736 22834328    | 0.041618              | -1.23            | 0.918668              | -1.03            | 0.905989              | -1.02            |
| LOC107129746 |                                                                 | 5 81853374 81855318    | 0.041618              | -1.70            | 0.929090              | 1.07             | 0.253916              | 1.45             |
| LOC107130244 |                                                                 | 7 47355146 47379951    | 0.041618              | -3.21            | 0.799808              | -1.40            | 0.959682              | 1.05             |
| LOC102136088 | cytochrome P450 2U1                                             | 5 107318249 107336735  | 0.041703              | 1.33             | 0.911281              | -1.04            | 0.003708              | 1.52             |
| LOC102128911 | golgin subfamily A member 1 isoform X2                          | 19 46601892 46679054   | 0.041713              | 1.37             | 0.312996              | -1.32            | 0.040918              | -1.41            |
| TFE3         | transcription factor E3 isoform X1                              | X 47562074 47575076    | 0.041713              | 1.17             | 0.319962              | -1.15            | 0.540917              | -1.06            |
| HYLS1        | hydrolethalus syndrome protein 1 homolog                        | 14 121703178 121712145 | 0.041713              | -1.27            | 0.822932              | -1.07            | 0.644864              | 1.08             |
| TMEM59L      | transmembrane protein 59-like                                   | 19 19074355 19082284   | 0.041749              | 3.74             | 0.975445              | -1.07            | 0.331890              | -2.01            |
| ZFP41        | zinc finger protein 41 homolog                                  | 8 144854861 144855457  | 0.041750              | 1.31             | 0.614979              | -1.15            | 0.845059              | -1.04            |
| LOC102121317 |                                                                 | 2 30684288 30694628    | 0.041750              | -2.03            | 0.605999              | -1.46            | 0.751553              | -1.17            |
| C14H11orf98  |                                                                 | 14 11601550 11606709   | 0.041759              | -1.39            | 0.791134              | -1.11            | 0.926133              | -1.02            |
| C14H11orf63  | uncharacterized protein C14orf63 homolog                        | 14 118876911 118950306 | 0.041899              | 1.82             | 0.900728              | -1.10            | 0.339258              | -1.41            |
| EXOC5        | exocyst complex component 5                                     | 7 121468819 121529372  | 0.041913              | -1.63            | 0.160412              | 1.76             | 0.540818              | 1.21             |
| ZNRF2        | LOW QUALITY PROTEIN: E3 ubiquitin-protein ligase                | 3 90296819 90379890    | 0.041913              | -1.72            | 0.409466              | 1.51             | 0.999183              | 1.00             |
| NMD3         | 60S ribosomal export protein NMD3 isoform X1                    | 2 63632508 63659610    | 0.041962              | -1.28            | 0.963515              | 1.02             | 0.581390              | 1.09             |
| LOC102131409 |                                                                 | 6 93121189 93128535    | 0.041962              | -1.95            | 0.933452              | 1.08             | 0.823252              | -1.11            |
| ZC3H4        | zinc finger CCCH domain-containing protein 4                    | 19 47843157 47894582   | 0.041962              | 1.21             | 0.785607              | -1.06            | 0.537293              | 1.08             |
| SHISA2       | protein shisa-2 homolog                                         | 17 6008597 6013042     | 0.042039              | -1.93            | 0.080025              | 2.52             | 0.000007              | 3.73             |
| ARHGAP1      | rho GTPase-activating protein 1                                 | 14 20875404 20896794   | 0.042152              | 1.11             | 0.060803              | -1.16            | 0.813728              | 1.02             |
| ARHGEF10     | rho guanine nucleotide exchange factor 10                       | 8 1720778 1871912      | 0.042209              | 1.42             | 0.069848              | 1.64             | 0.508805              | 1.16             |
| LOC102123264 | histone H1.4                                                    | 4 144417418 144418077  | 0.042253              | -7.38            | 1.000000              | -2.13            | 0.914531              | -1.12            |
| ARHGEF40     | rho guanine nucleotide exchange factor 40                       | 7 84624180 84642586    | 0.042325              | 1.31             | 0.276153              | 1.29             | 0.460308              | 1.13             |
| KCNK12       | potassium channel subfamily K member 12                         | 13 62806405 62856702   | 0.042379              | 8.10             | 0.343862              | 3.47             | 0.736696              | -1.35            |
| ENOX1        | ecto-NOX disulfide-thiol exchanger 1 isoform X1                 | 17 22392461 2236227    | 0.042396              | 1.78             | 0.643457              | 1.31             | 0.636184              | -1.18            |
| RICTOR       | rapamycin-insensitive companion of mTOR                         | 6 39406114 39530500    | 0.042596              | -1.57            | 0.557770              | 1.30             | 0.357364              | 1.29             |
| HEPACAM2     | HEPACAM family member 2 isoform X1                              | 3 118742559 118784186  | 0.042666              | 3.33             | 0.890198              | -1.24            | 0.891585              | 1.13             |



| Gene symbol  | Gene name                                    | chr_start_end          | Day3 adjusted P-value | Day3 fold change | Day5 adjusted P-value | Day5 fold change | Day7 adjusted P-value | Day7 fold change |
|--------------|----------------------------------------------|------------------------|-----------------------|------------------|-----------------------|------------------|-----------------------|------------------|
| CHST8        | carbohydrate sulfotransferase 8              | 19 34060210 34171190   | 0.042666              | 2.64             | 0.542966              | 1.79             | 0.081652              | 2.79             |
| IL21         | interleukin-21                               | 5 121593279 121601806  | 0.042666              | 2.62             | 0.078295              | 3.08             | 0.045912              | 2.22             |
| SLITRK6      | SLIT and NTRK-like protein 6                 | 17 68418257 68420782   | 0.042666              | 2.15             | 0.000149              | 6.99             | 0.598312              | -1.30            |
| SIX5         | homeobox protein SIX5                        | 19 46628053 46631409   | 0.042666              | 1.45             | 0.432513              | -1.31            | 0.787002              | 1.07             |
| TBRG1        | transforming growth factor beta regulator    | 14 120419316 120428422 | 0.042666              | -1.16            | 0.011893              | -1.31            | 0.281658              | -1.10            |
| LOC101865328 | uncharacterized protein LOC101865328         | 8 1683801 1684523      | 0.042666              | -1.34            | 0.042932              | -1.56            | 0.033381              | -1.40            |
| TMTC3        | transmembrane and TPR repeat-containing      | 11 91667961 91715589   | 0.042666              | -1.48            | 0.522630              | 1.28             | 0.576227              | 1.15             |
| TDP2         | tyrosyl-DNA phosphodiesterase 2              | 4 145915058 145931300  | 0.042666              | -1.30            | 0.434569              | 1.21             | 0.522480              | 1.11             |
| PP1SK2       | inositol hexakisphosphate and diphosphoi     | 6 101677310 101747939  | 0.042666              | -1.43            | 0.638705              | 1.19             | 0.285153              | 1.26             |
| LGALS3       | galectin-3                                   | 7 119372206 119379993  | 0.042682              | -1.51            | 0.281334              | -1.47            | 0.199445              | -1.36            |
| PTPRS        | receptor-type tyrosine-protein phosphatase   | 19 5331017 5415458     | 0.042726              | 1.43             | 0.705328              | -1.16            | 0.598080              | 1.13             |
| ECHDC1       | ethylmalonyl-CoA decarboxylase isoform       | 4 31390955 31443176    | 0.042829              | -1.30            | 0.069683              | 1.45             | 0.259691              | 1.20             |
| LOC102139564 |                                              | 8 101297316 101300592  | 0.042868              | -1.17            | 0.535447              | 1.10             | 0.726518              | 1.04             |
| TIMM8A       | mitochondrial import inner membrane transp   | X 98496647 98498800    | 0.043070              | -1.47            | 0.974953              | -1.02            | 0.868906              | 1.05             |
| SIN3A        | paired amphipathic helix protein Sin3a       | 7 53553921 53612458    | 0.043132              | 1.26             | 0.995074              | 1.00             | 0.683540              | 1.06             |
| LOC107129601 | butyrophilin subfamily 3 member A3-like      | 4 144077881 144082260  | 0.043202              | 1.47             | 0.965288              | -1.03            | 0.495650              | 1.18             |
| LOC102136165 | cytochrome c oxidase copper chaperone        | 2 152511128 152513295  | 0.043205              | -1.25            | 0.271846              | 1.24             | 0.319834              | -1.15            |
| ARMC12       | armadillo repeat-containing protein 12 iso   | 4 135023788 135036489  | 0.043205              | -1.60            | 0.591749              | -1.30            | 0.680740              | -1.14            |
| C13H2orf50   | uncharacterized protein C2orf50 homolog      | 13 99836372 99848786   | 0.043207              | 2.01             | 0.753766              | 1.35             | 0.898966              | 1.08             |
| MAPKBP1      | mitogen-activated protein kinase-binding     | 7 18717906 18768124    | 0.043207              | 1.28             | 0.973449              | -1.01            | 0.753098              | -1.05            |
| LYSMD2       | lysM and putative peptidoglycan-binding      | 7 28711835 28713273    | 0.043224              | -1.51            | 0.081238              | 1.77             | 0.583275              | 1.16             |
| EXTL3        | exostosin-like 3                             | 8 29178278 29213245    | 0.043392              | 1.28             | 0.248415              | 1.28             | 0.696000              | 1.07             |
| TBCEL        | tubulin-specific chaperone cofactor E-like   | 14 117109553 117124203 | 0.043509              | 1.49             | 0.958401              | -1.03            | 0.764797              | 1.08             |
| N4BP2        | NEDD4-binding protein 2 isoform X1           | 5 39805348 39860392    | 0.043509              | -1.46            | 0.572754              | 1.24             | 0.981474              | 1.01             |
| LOC102136805 | C-C motif chemokine 4                        | 16 32494904 32496333   | 0.043509              | -1.90            | 0.150931              | -2.15            | 0.846058              | 1.09             |
| LOC107127743 |                                              | 16 18740929 18749219   | 0.043509              | -4.88            | 0.878397              | -1.30            | 0.778103              | -1.30            |
| LOC107126472 | immunoglobulin omega chain-like              | 10 29573991 29574498   | 0.043581              | 2.39             | 0.078295              | 3.26             | 0.788393              | 1.17             |
| EPB41L1      | band 4.1-like protein 1 isoform X1           | 10 67684090 67740045   | 0.043692              | 1.28             | 0.228904              | -1.29            | 0.808154              | -1.04            |
| LOC107127150 | uncharacterized protein LOC107127150         | 13 82055895 82088685   | 0.043707              | 2.84             | 0.536251              | -1.81            | 0.109506              | -2.32            |
| HERC1        | probable E3 ubiquitin-protein ligase HER     | 7 40978544 41143879    | 0.043753              | 1.18             | 0.006486              | -1.37            | 0.251876              | -1.12            |
| GALNS        | N-acetylgalactosamine-6-sulfatase            | 20 77254026 77304445   | 0.043764              | 1.52             | 0.196621              | -1.58            | 0.710207              | 1.11             |
| C7H15orf61   | uncharacterized protein C15orf61 homolo      | 7 45188326 45193598    | 0.043778              | -1.29            | 0.960153              | -1.02            | 0.535637              | -1.11            |
| LOC102140030 |                                              | 14 125087743 125103462 | 0.043824              | 2.60             | 0.479791              | -1.98            | 0.154047              | -2.12            |
| TLN2         | talin-2 isoform X1                           | 7 40007374 40199318    | 0.043824              | 1.58             | 0.438879              | 1.39             | 0.754468              | 1.10             |
| MBD1         | methyl-CpG-binding domain protein 1 iso      | 18 31484162 31496403   | 0.043824              | 1.14             | 0.736198              | -1.05            | 0.413109              | -1.07            |
| LOC107129340 |                                              | 3 177178953 177319553  | 0.043824              | -1.26            | 0.948957              | 1.02             | 0.939282              | 1.01             |
| MAPK15       | mitogen-activated protein kinase 15 isofo    | 8 145348992 145354777  | 0.043828              | 9.63             | 0.912161              | 1.43             | 0.601520              | -2.17            |
| PEX5         | peroxisomal biogenesis factor 5 isoform X    | 11 7623835 7640011     | 0.043904              | 1.14             | 0.439306              | -1.10            | 0.788063              | 1.03             |
| SLCO2B1      | solute carrier organic anion transporter fam | 14 70437825 70491884   | 0.043940              | -1.67            | 0.798468              | 1.17             | 0.400981              | 1.30             |
| SMIM15       | small integral membrane protein 15           | 6 60730981 60731205    | 0.043940              | -1.67            | 0.322604              | 1.58             | 0.516259              | 1.24             |
| PLEKHA5      | pleckstrin homology domain-containing fa     | 11 19845844 20088331   | 0.043976              | 1.27             | 0.013622              | -1.53            | 0.144839              | 1.22             |
| PLAG1        | zinc finger protein PLAG1 isoform X1         | 8 57239872 57241897    | 0.044134              | -1.96            | 0.282068              | 1.91             | 0.618167              | 1.25             |
| RBM12B       | RNA-binding protein 12B                      | 8 94856593 94859598    | 0.044171              | -1.31            | 0.199469              | 1.34             | 0.218051              | 1.22             |
| COL4A6       | collagen alpha-6(IV) chain isoform X2        | X 105275322 105570572  | 0.044194              | 1.47             | 0.004702              | -2.14            | 0.178357              | -1.36            |
| DUOX1        | dual oxidase 1                               | 7 22044795 22078325    | 0.044222              | 2.88             | 0.798468              | 1.40             | 0.414218              | -1.69            |
| VASN         | vasorin                                      | 20 4622913 4624934     | 0.044222              | 1.27             | 0.310316              | -1.24            | 0.839665              | 1.03             |
| FAHD1        | acylpyruvate FAHD1, mitochondrial            | 20 1881539 1882213     | 0.044308              | -1.45            | 0.896958              | -1.07            | 0.890479              | 1.04             |
| MTF2         | metal-response element-binding transcript    | 1 133822638 133879287  | 0.044367              | -1.35            | 0.451097              | 1.24             | 0.172672              | 1.27             |
| CRYBA4       | beta-crystallin A4                           | 10 24894964 24903484   | 0.044407              | 1.54             | 0.662401              | 1.22             | 0.236705              | 1.37             |
| LRRC8E       | volume-regulated anion channel subunit L     | 19 8420491 8426666     | 0.044407              | -1.59            | 0.326649              | -1.49            | 0.412253              | -1.26            |
| OSBPL8       | oxysterol-binding protein-related protein 8  | 11 75528586 75664896   | 0.044407              | -1.76            | 0.423786              | 1.52             | 0.555685              | 1.24             |
| LOC107130823 | uncharacterized protein LOC107130823         | 1 270354 283055        | 0.044407              | -4.00            | 0.025707              | 33.97            | 0.322478              | -2.74            |
| PYROXD2      | pyridine nucleotide-disulfide oxidoreduct    | 9 97214379 97246225    | 0.044415              | 1.78             | 0.681226              | -1.29            | 0.975530              | 1.01             |
| TBC1D20      | TBC1 domain family member 20                 | 10 62159655 62189158   | 0.044511              | 1.31             | 0.813724              | -1.08            | 0.462872              | 1.13             |
| PPP1R32      | protein phosphatase 1 regulatory subunit 3   | 14 12781735 12790526   | 0.044566              | 4.32             | 1.000000              | -3.96            | 0.580663              | -2.06            |
| TERF2        | telomeric repeat-binding factor 2 isoform    | 20 57651340 57682047   | 0.044639              | 1.14             | 0.805815              | -1.04            | 0.289956              | 1.09             |
| LOC102138187 | Golgi apparatus membrane protein TVP2        | 16 15709483 15776848   | 0.044639              | -1.35            | 0.108439              | 1.47             | 0.878466              | 1.03             |
| ZCCHC2       | zinc finger CCHC domain-containing pro       | 18 17767916 17824215   | 0.044639              | -1.41            | 0.778436              | 1.12             | 0.872638              | -1.04            |
| HSD17B13     | 17-beta-hydroxysteroid dehydrogenase 13      | 5 86385325 86403406    | 0.044639              | -5.39            | 0.080241              | 13.38            | 0.756419              | 1.50             |
| LOC102140799 | serine/threonine-protein kinase/endoribon    | 13 22865541 22877548   | 0.044678              | 5.11             | 0.660491              | -2.26            | 0.439610              | -2.23            |
| PBX2         | pre-B-cell leukemia transcription factor 2   | 4 138704939 138708462  | 0.044737              | 1.20             | 0.781775              | -1.06            | 0.508969              | 1.08             |
| KLHL8        | kelch-like protein 8 isoform X3              | 5 86245372 86275813    | 0.044737              | -1.36            | 0.061996              | -1.55            | 0.568664              | 1.12             |
| WDTC1        | WD and tetratricopeptide repeats protein     | 1 200935522 200988216  | 0.044797              | 1.26             | 0.221333              | -1.27            | 0.933007              | -1.01            |
| KCND3        | potassium voltage-gated channel subfamil     | 1 114795412 115004105  | 0.044838              | 2.63             | 0.430436              | 2.15             | 0.399701              | -1.69            |
| TCTN2        | tectonic-2 isoform X1                        | 11 19637 56866         | 0.044893              | 1.48             | 0.845114              | -1.10            | 0.445118              | -1.21            |
| FGD3         | FYVE, RhoGEF and PH domain-containi          | 15 107040001 107097757 | 0.044974              | 1.32             | 0.720085              | -1.12            | 0.395025              | -1.16            |
| DCAKD        | dephospho-CoA kinase domain-containin        | 16 56846967 56852678   | 0.044982              | 1.27             | 0.915438              | 1.04             | 0.810973              | 1.04             |
| CCDC151      | coiled-coil domain-containing protein 151    | 19 11755441 11770063   | 0.045001              | 1.75             | 0.545926              | 1.41             | 0.115035              | -1.66            |
| LOC102116386 | putative uncharacterized protein ZNRD1-4     | 4 140899997 140901641  | 0.045001              | 1.73             | 0.930443              | -1.07            | 0.713879              | 1.14             |
| PAPD4        | poly(A) RNA polymerase GLD2 isoform          | 6 77915202 77983398    | 0.045001              | -1.30            | 0.771454              | 1.09             | 0.579253              | 1.10             |
| UBE2N        | ubiquitin-conjugating enzyme E2 N            | 11 97100080 97131869   | 0.045001              | -1.48            | 0.873227              | 1.08             | 0.557288              | 1.16             |
| GNPNAT1      | glucosamine 6-phosphate N-acetyltransfer     | 7 116951864 116959006  | 0.045001              | -1.76            | 0.785607              | 1.19             | 0.613190              | 1.20             |
| FCER2        | low affinity immunoglobulin epsilon Fc r     | 19 8038212 8048370     | 0.045074              | 2.00             | 0.904490              | -1.12            | 0.746287              | 1.07             |
| C15H9orf9    | uncharacterized protein C9orf9 homolog       | 15 5903269 5909278     | 0.045104              | 1.64             | 0.966616              | 1.03             | 0.015229              | -1.88            |
| KIAA1109     | uncharacterized protein KIAA1109 homo        | 5 121150174 121343310  | 0.045107              | 1.25             | 0.905244              | 1.04             | 0.568453              | 1.09             |
| FAM173B      | uncharacterized protein LOC101867436         | 6 10332078 10354584    | 0.045107              | -1.30            | 0.810316              | 1.08             | 0.239377              | -1.20            |
| ADM          | ADM isoform X3                               | 14 57498600 57499536   | 0.045107              | -2.14            | 0.832367              | -1.22            | 0.920710              | -1.06            |
| LOC102132273 | uncharacterized protein LOC102132273         | 20 62277981 62280471   | 0.045288              | 1.26             | 0.846842              | 1.06             | 0.261345              | 1.17             |
| XRCC1        | DNA repair protein XRCC1 isoform X1          | 19 44273964 44305610   | 0.045480              | 1.20             | 0.727699              | -1.07            | 0.645928              | 1.06             |
| CNPAS2       | calpain small subunit 2                      | 20 43450642 43451388   | 0.045576              | 6.20             | 0.734682              | 2.38             | 0.698151              | -1.72            |
| TCERG1       | transcription elongation regulator 1 isofor  | 6 145700423 145763224  | 0.045576              | -1.32            | 0.854975              | 1.07             | 0.992274              | 1.00             |
| UBXN7        | UBX domain-containing protein 7 isoform      | 2 636245 713189        | 0.045646              | 1.23             | 0.808068              | -1.06            | 0.967768              | -1.01            |
| SGCA         | alpha-sarcoglycan                            | 16 35558382 35569507   | 0.045699              | 1.90             | 0.240647              | 1.94             | 0.750778              | -1.15            |
| LOC107129150 | T-cell receptor beta chain V region CTL-1    | 3 175534768 175545625  | 0.045756              | 7.68             | 1.000000              | 1.31             | 0.139423              | 3.10             |
| ARHGAP27     | rho GTPase-activating protein 27 isoform     | 16 57226436 57241584   | 0.045834              | 1.20             | 0.718863              | 1.08             | 0.058214              | 1.22             |
| C13H2orf81   | uncharacterized protein C2orf81 homolog      | 13 35490623 35498358   | 0.045896              | 1.77             | 0.523856              | -1.45            | 0.919712              | 1.05             |
| LOC102125234 |                                              | 12 80782076 80792074   | 0.045980              | 3.01             | 0.056154              | 5.78             | 0.354990              | 1.87             |

| Gene symbol  | Gene name                                    | chr_start_end          | Day3 adjusted P-value | Day3 fold change | Day5 adjusted P-value | Day5 fold change | Day7 adjusted P-value | Day7 fold change |
|--------------|----------------------------------------------|------------------------|-----------------------|------------------|-----------------------|------------------|-----------------------|------------------|
| APBA2        | amyloid beta A4 precursor protein-binding    | 7 6494154 6558122      | 0.045982              | 1.51             | 0.414334              | 1.35             | 0.754719              | 1.08             |
| GAS2L2       | GAS2-like protein 2                          | 16 32113582 32121500   | 0.046017              | 6.77             | 0.979696              | -1.08            | 0.445118              | -2.55            |
| AHSP         | alpha-hemoglobin-stabilizing protein isofo   | 20 30192363 30202483   | 0.046190              | 7.56             | 0.139912              | 8.88             | 0.403519              | 1.98             |
| MIXL1        | homeobox protein MIXL1                       | 1 85063318 85065471    | 0.046190              | 5.69             | 0.405873              | -2.51            | 0.560127              | -1.49            |
| GABPB1       | GA-binding protein subunit beta-1 isoform    | 7 27254952 27284372    | 0.046190              | -1.26            | 0.612280              | 1.13             | 0.730623              | 1.06             |
| MAFB         | transcription factor MafB                    | 10 72321080 72322051   | 0.046196              | -1.79            | 0.875484              | -1.13            | 0.934435              | 1.04             |
| PGGT1B       | geranylgeranyl transferase type-1 subunit    | 6 114003746 114055083  | 0.046201              | -1.35            | 0.169762              | 1.41             | 0.667589              | 1.09             |
| LNX2         | ligand of Numb protein X 2                   | 17 7335202 7371133     | 0.046201              | -1.37            | 0.146364              | 1.47             | 0.928534              | -1.02            |
| LOC102128870 |                                              | 1 176020655 176027567  | 0.046409              | -1.93            | 0.699758              | -1.31            | 0.396209              | -1.40            |
| ARHGAP20     | rho GTPase-activating protein 20 isoform     | 14 106565654 106686193 | 0.046436              | 1.61             | 0.819860              | 1.14             | 0.550592              | -1.20            |
| FOXJ1        | forkhead box protein J1                      | 16 73486252 73489270   | 0.046649              | 2.40             | 0.311625              | -2.22            | 0.926696              | 1.06             |
| RIF1         | telomere-associated protein RIF1 isoform     | 12 40080111 40140918   | 0.046649              | -1.33            | 0.227582              | 1.34             | 0.703385              | 1.08             |
| RELL2        | RELT-like protein 2 isoform X1               | 6 140772178 140774410  | 0.046653              | -1.34            | 0.930147              | -1.04            | 0.445745              | -1.16            |
| MPS28        | 28S ribosomal protein S28, mitochondrial     | 8 81060355 81161355    | 0.046662              | -1.19            | 0.115476              | 1.26             | 0.585125              | 1.06             |
| COQ10B       | coenzyme Q-binding protein COQ10 hom         | 12 86637148 86658334   | 0.046662              | -1.37            | 0.235050              | 1.39             | 0.599341              | 1.11             |
| GGCT         | gamma-glutamylcyclotransferase isoform       | 3 90156068 90163648    | 0.046677              | 1.40             | 0.804607              | 1.10             | 0.674176              | -1.10            |
| SLAMF9       | SLAM family member 9 precursor               | 1 91718671 91721141    | 0.046710              | 1.54             | 0.000004              | 3.40             | 0.492448              | -1.20            |
| ATP5F1       | ATP synthase F(0) complex subunit B1, m      | 1 115328257 115339960  | 0.046816              | -1.25            | 0.860630              | 1.05             | 0.598312              | 1.08             |
| HUS1B        | checkpoint protein HUS1B                     | 4 170427119 170428258  | 0.046832              | 1.67             | 0.650361              | 1.29             | 0.740615              | -1.13            |
| MYLPF        | myosin regulatory light chain 2, skeletal m  | 20 28970207 28973242   | 0.046966              | 2.51             | 0.916893              | -1.15            | 0.316050              | -1.70            |
| LOC102129539 | Ig lambda chain V-I region BL2-like isofo    | 10 28444448 29137617   | 0.046966              | 1.91             | 0.745066              | 1.27             | 0.965303              | 1.02             |
| KIF21B       | kinesin-like protein KIF21B isoform X4       | 1 59330657 59382939    | 0.046966              | 1.47             | 0.289577              | -1.43            | 0.064845              | 1.48             |
| PDGFD        | platelet-derived growth factor D isoform X   | 14 99867564 100114686  | 0.046966              | 1.38             | 0.102679              | 1.53             | 0.053529              | 1.41             |
| DAB2IP       | disabled homolog 2-interacting protein iso   | 15 15482015 15508332   | 0.046966              | 1.24             | 0.901660              | -1.04            | 0.895007              | -1.02            |
| CASC3        | protein CASC3 isoform X2                     | 16 51773372 51805683   | 0.046966              | 1.19             | 1.000000              | -1.00            | 0.332791              | 1.61             |
| KIF3A        | kinesin-like protein KIF3A isoform X3        | 6 131668289 131727479  | 0.046966              | -1.20            | 0.277819              | 1.18             | 0.008069              | 1.27             |
| CD63         | CD63 antigen                                 | 11 54623294 54626077   | 0.046966              | -1.37            | 0.415304              | -1.27            | 0.077471              | -1.37            |
| KIAA1033     | WASH complex subunit 7 isoform X1            | 11 108843743 108904747 | 0.046966              | -1.57            | 0.393299              | 1.43             | 0.271206              | 1.35             |
| LOC102124740 |                                              | 0 21 2525              | 0.046966              | -1.82            | 0.598121              | -1.38            | 0.174137              | -1.62            |
| RCVRN        | recoverin                                    | 16 10059426 10068806   | 0.046966              | -1.83            | 0.976174              | -1.03            | 0.219277              | -1.57            |
| RBM44        | RNA-binding protein 44 isoform X1            | 12 127647665 127668788 | 0.047026              | 2.48             | 0.404689              | 2.06             | 0.094298              | 2.69             |
| LOC102127675 |                                              | 15 16441496 16455011   | 0.047026              | 1.73             | 0.000320              | 3.77             | 0.097836              | -1.68            |
| NDFIP1       | NEDD4 family-interacting protein 1           | 6 141273699 141313894  | 0.047026              | -1.19            | 0.778436              | 1.06             | 0.810460              | 1.03             |
| MAPK8        | mitogen-activated protein kinase 8 isoform   | 9 46615563 46648770    | 0.047026              | -1.22            | 0.983389              | 1.01             | 0.561791              | 1.08             |
| GPR89A       | Golgi pH regulator A                         | 1 104691699 104746289  | 0.047026              | -1.25            | 0.393943              | -1.19            | 0.617761              | -1.07            |
| SRSF1        | serine/arginine-rich splicing factor 1 isofo | 16 43516000 43518126   | 0.047026              | -1.25            | 0.500829              | 1.16             | 0.402496              | 1.12             |
| RAB18        | ras-related protein Rab-18 isoform X4        | 9 27867257 27900704    | 0.047026              | -1.54            | 0.360379              | 1.43             | 0.505907              | 1.20             |
| TWF1         | twinfilin-1                                  | 11 42381274 42392021   | 0.047026              | -1.56            | 0.138122              | 1.73             | 0.470743              | 1.23             |
| TM4SF19      | transmembrane 4 L6 family member 19 is       | 2 602486 606208        | 0.047026              | -2.31            | 0.986563              | -1.02            | 0.560222              | -1.38            |
| LOC102131719 |                                              | 9 37797950 37805220    | 0.047026              | -9.68            | 0.988786              | -1.06            | 0.409716              | 3.18             |
| TMEM50B      | transmembrane protein 50B isoform X1         | 3 13289394 13307707    | 0.047141              | -1.19            | 0.064481              | 1.30             | 0.015312              | 1.26             |
| LOC107130513 | Ig heavy chain V-III region 23-like isoform  | 7 171495705 171515013  | 0.047169              | 2.50             | 0.913369              | -1.14            | 0.954511              | -1.04            |
| ZNF517       | zinc finger protein 517                      | 8 146502500 146513606  | 0.047445              | 1.57             | 0.845810              | -1.13            | 0.806171              | -1.09            |
| MGA          | MAX gene-associated protein isoform X1       | 7 18616572 18710199    | 0.047445              | 1.12             | 0.463167              | 1.08             | 0.294827              | -1.08            |
| LOC101925242 | uncharacterized protein LOC101925242 i       | 14 49221828 49283035   | 0.047486              | -1.88            | 0.963154              | 1.05             | 0.640140              | 1.22             |
| PAN3         | PAB-dependent poly(A)-specific ribonuc       | 17 7868381 8027259     | 0.047653              | -1.27            | 0.239420              | 1.28             | 0.183422              | 1.21             |
| ZNF16        | zinc finger protein 16 isoform X1            | 8 146632146 146648828  | 0.047721              | 1.97             | 0.329312              | -1.83            | 0.227009              | -1.64            |
| C3AR1        | C3a anaphylatoxin chemotactic receptor       | 11 8577827 8579272     | 0.047977              | -1.76            | 0.511089              | -1.44            | 0.838443              | -1.09            |
| ADAMTS1      | A disintegrin and metalloproteinase with t   | 3 20136446 20143819    | 0.048162              | 1.69             | 0.000344              | 3.58             | 0.516070              | -1.25            |
| LOC102132317 | LOW QUALITY PROTEIN: A disintegrin           | 7 61548546 61596873    | 0.048162              | 1.61             | 0.621810              | -1.28            | 0.188993              | -1.46            |
| P2RX7        | P2X purinoreceptor 7 isoform X2              | 11 125131044 125184569 | 0.048162              | 1.39             | 0.953681              | 1.03             | 0.164475              | 1.32             |
| PPIL3        | peptidyl-prolyl cis-trans isomerase-like 3   | 12 90236701 90252975   | 0.048162              | -1.40            | 0.205949              | -1.44            | 0.775659              | -1.07            |
| ACSBG1       | long-chain-fatty-acid--CoA ligase ACSBG      | 7 56505368 56572219    | 0.048189              | 1.95             | 0.010798              | -7.08            | 0.535327              | 1.30             |
| EGLN1        | egl nine homolog 1                           | 1 18135415 18191217    | 0.048255              | -1.49            | 0.169116              | 1.59             | 0.363058              | 1.25             |
| ACE2         | angiotensin-converting enzyme 2              | X 13369024 13426212    | 0.048288              | 1.58             | 0.108600              | 1.80             | 0.998297              | 1.00             |
| EAPP         | E2F-associated phosphoprotein                | 7 98487203 98495953    | 0.048288              | 1.29             | 0.777215              | -1.09            | 0.351776              | 1.16             |
| DES12        | desumoylating isopeptidase 2 isoform X2      | 1 4736916 4796293      | 0.048288              | -1.31            | 0.405581              | 1.24             | 0.439232              | 1.14             |
| NSL1         | kinetochore-associated protein NSL1 hom      | 1 71334886 71376881    | 0.048288              | -1.32            | 0.550404              | 1.18             | 0.117233              | 1.29             |
| LOC102125467 | cytochrome P450 2S1 isoform X1               | 19 41743545 41760901   | 0.048288              | -1.86            | 0.153466              | -2.10            | 0.135884              | -1.72            |
| ABLIM1       | actin-binding LIM protein 1 isoform X5       | 9 113638922 113973486  | 0.048313              | 1.30             | 0.695517              | 1.12             | 0.641829              | -1.08            |
| ZSCAN29      | zinc finger and SCAN domain-containing       | 7 20341775 20350592    | 0.048352              | 1.15             | 0.885680              | -1.03            | 0.844967              | -1.02            |
| PSMA3        | proteasome subunit alpha type-3 isoform      | 7 122522588 122549626  | 0.048352              | -1.30            | 0.943090              | -1.03            | 0.683124              | 1.07             |
| TMX1         | thioredoxin-related transmembrane protein    | 7 115449094 115463696  | 0.048352              | -1.57            | 0.226211              | 1.61             | 0.364968              | 1.29             |
| EIF1B        | eukaryotic translation initiation factor 1b  | 2 95253818 95255880    | 0.048357              | -1.21            | 0.590757              | 1.11             | 0.504948              | -1.08            |
| RMI1         | recQ-mediated genome instability protein     | 15 94791377 94812077   | 0.048357              | -1.53            | 0.359135              | 1.44             | 0.043496              | 1.61             |
| NXT2         | NTF2-related export protein 2 isoform X1     | X 106658478 106665340  | 0.048357              | -1.83            | 0.264616              | 1.82             | 0.358852              | 1.41             |
| SLC4A5       | electrogenic sodium bicarbonate cotransp     | 13 35563757 35697722   | 0.048602              | 1.72             | 0.061996              | -2.22            | 0.267032              | -1.44            |
| RSPRY1       | RING finger and SPRY domain-containin        | 20 45232910 45266875   | 0.048673              | -1.21            | 0.102679              | 1.29             | 0.565748              | 1.07             |
| C7H15orf39   | uncharacterized protein C15orf39 homolo      | 7 53304341 53309373    | 0.048858              | 1.17             | 0.918932              | -1.02            | 0.710190              | 1.04             |
| LOC102126536 | platelet factor 4 variant                    | 5 60745242 60745989    | 0.048858              | -2.28            | 0.482358              | -1.75            | 0.566216              | 1.36             |
| DRC7         | dynein regulatory complex subunit 7          | 20 45729151 45761304   | 0.048879              | 5.25             | 0.940055              | -1.22            | 0.460588              | -2.37            |
| LOC102129679 | cytochrome P450 4F22                         | 19 15828520 15847825   | 0.048879              | -3.33            | 0.657091              | 1.87             | 0.072278              | 5.61             |
| NPHS1        | LOW QUALITY PROTEIN: nephrin                 | 19 36273622 36298224   | 0.048907              | 6.98             | 1.000000              | 3.76             | 0.071591              | 5.38             |
| LOC102116722 | arf-GAP with GTPase, ANK repeat and P        | 9 48122494 48141525    | 0.048936              | -1.85            | 0.966616              | -1.04            | 0.583858              | -1.25            |
| SPEN         | msx2-interacting protein isoform X1          | 1 212480877 212582384  | 0.049104              | 1.40             | 0.579401              | 1.21             | 0.752838              | 1.08             |
| ALX1         | ALX homeobox protein 1                       | 11 84572829 84594183   | 0.049123              | 6.31             | 0.929140              | -1.25            | 0.139423              | 5.84             |
| TCFL5        | transcription factor-like 5 protein          | 10 94965597 94987277   | 0.049224              | 1.36             | 0.070769              | 1.57             | 0.888212              | 1.03             |
| MARCKS       | myristoylated alanine-rich C-kinase substr   | 4 17842929 17846452    | 0.049224              | -1.93            | 0.654406              | 1.37             | 0.620169              | 1.24             |
| LOC102145933 | class I histocompatibility antigen, Gogo-B   | 0 4805 6750            | 0.049274              | 1.55             | 0.329064              | 1.48             | 0.048859              | -1.61            |
| ZNF549       | zinc finger protein 549                      | 19 58162168 58174595   | 0.049274              | 1.30             | 0.070565              | 1.47             | 0.277797              | 1.20             |
| ANKH         | progressive ankylosis protein homolog iso    | 6 15128315 15281889    | 0.049274              | 1.30             | 0.490438              | 1.19             | 0.709820              | -1.07            |
| ZNF496       | zinc finger protein 496 isoform X1           | 1 1957511 1984220      | 0.049274              | 1.27             | 0.690726              | -1.11            | 0.518522              | 1.11             |
| LOC102116109 | zinc finger protein 92 isoform X1            | 3 57614107 57643972    | 0.049274              | -1.42            | 0.979788              | 1.01             | 0.113313              | 1.38             |
| SFRP5        | secreted frizzled-related protein 5          | 9 96602016 96606560    | 0.049274              | -2.35            | 0.033976              | 4.17             | 0.286710              | -1.73            |
| KATNAL2      | katanin p60 ATPase-containing subunit A      | 18 34779129 34903336   | 0.049330              | 3.78             | 0.898562              | 1.31             | 0.587749              | -1.80            |
| AOC2         | retina-specific copper amine oxidase isofo   | 16 54599220 54604996   | 0.049330              | 2.53             | 0.202228              | 2.76             | 0.859726              | -1.12            |
| NKX6-2       | homeobox protein Nkx-6.2                     | 9 132269280 132270317  | 0.049330              | -5.75            | 0.493075              | -3.25            | 0.011938              | -10.02           |

| Gene symbol  | Gene name                                    | chr_start_end         | Day3 adjusted P-value | Day3 fold change | Day5 adjusted P-value | Day5 fold change | Day7 adjusted P-value | Day7 fold change |
|--------------|----------------------------------------------|-----------------------|-----------------------|------------------|-----------------------|------------------|-----------------------|------------------|
| QARS         | glutamine--tRNA ligase isoform X1            | 2 104260931 104270395 | 0.049401              | 1.20             | 0.111460              | -1.26            | 0.549839              | -1.07            |
| CREG1        | protein CREG1                                | 1 25509782 25521264   | 0.049408              | -1.64            | 0.866280              | -1.11            | 0.944041              | 1.03             |
| NRN1         | uncharacterized protein LOC101926116         | 4 164976882 164984651 | 0.049453              | 1.80             | 0.827895              | 1.17             | 0.138467              | 1.69             |
| LOC102128299 |                                              | 12 26783890 26867192  | 0.049453              | -1.60            | 0.377525              | 1.45             | 0.514155              | 1.22             |
| LOC102143714 | cytochrome P450 1A1-like                     | 15 83797639 83811557  | 0.049541              | -2.97            | 0.536254              | -2.03            | 0.489615              | 1.60             |
| ATHL1        | acid trehalase-like protein 1 isoform X1     | 14 105965 110852      | 0.049553              | 1.61             | 0.860012              | 1.11             | 0.264025              | -1.38            |
| ZIK1         | zinc finger protein interacting with ribonu  | 19 58225335 58239989  | 0.049553              | 1.52             | 0.707734              | -1.19            | 0.838388              | -1.07            |
| FTHL17       | ferritin heavy polypeptide-like 17           | X 29296584 29297135   | 0.049585              | -9.42            | 0.878397              | -1.44            | 0.896263              | -1.22            |
| C1H8orf59    | uncharacterized protein LOC101925831         | 1 82264092 82264394   | 0.049633              | -1.61            | 0.599861              | 1.31             | 0.146688              | 1.54             |
| ZFC3H1       | zinc finger C3H1 domain-containing prote     | 11 70677441 70730914  | 0.049648              | -1.30            | 0.926404              | 1.04             | 0.845882              | 1.04             |
| LOC102116602 | fer-1-like protein 4                         | 10 67042860 67096229  | 0.049659              | 2.84             | 0.064805              | -4.78            | 0.400583              | -1.73            |
| IFT172       | intraflagellar transport protein 172 homolo  | 13 83347862 83393510  | 0.049686              | 1.52             | 0.484202              | -1.33            | 0.137399              | -1.44            |
| SAMD15       | sterile alpha motif domain-containing pro    | 7 142118223 142132118 | 0.049714              | 2.70             | 0.965051              | 1.10             | 0.765964              | 1.25             |
| LOC107129321 | uncharacterized protein LOC107129321         | 3 175795320 175796117 | 0.049714              | 2.46             | 0.207150              | -2.50            | 0.747414              | -1.19            |
| MAG          | myelin-associated glycoprotein isoform X     | 19 35750474 35769553  | 0.049714              | -1.60            | 0.879651              | -1.10            | 0.527555              | -1.21            |
| ZMYM5        | zinc finger MYM-type protein 5 isoform X     | 17 1625712 1654716    | 0.049745              | -1.27            | 0.474556              | 1.19             | 0.551381              | -1.10            |
| GEMIN7       | gem-associated protein 7                     | 11 56928536 56928931  | 0.049745              | -1.35            | 0.573361              | -1.19            | 0.450335              | -1.16            |
| GIPC3        | PDZ domain-containing protein GIPC3          | 19 3557915 3561487    | 0.049829              | 1.45             | 0.146713              | 1.59             | 0.958180              | -1.02            |
| DCUN1D5      | DCN1-like protein 5 isoform X1               | 14 99005547 99035244  | 0.049954              | -1.39            | 0.737033              | 1.13             | 0.981621              | -1.01            |
| LOC102120124 | mpv17-like protein                           | 20 3401 11580         | 0.049954              | -2.01            | 0.342899              | -1.81            | 0.744334              | 1.16             |
| ATP2B4       | plasma membrane calcium-transporting A       | 1 62160719 62212667   | 0.049961              | 1.25             | 0.504382              | 1.16             | 0.841336              | 1.03             |
| RSPH14       | radial spoke head 14 homolog                 | 10 28177146 28258235  | 0.050164              | 4.85             | 0.982627              | -1.07            | 0.366096              | -2.58            |
| CELF4        | CUGBP Elav-like family member 4 isofo        | 18 44473136 44783745  | 0.050164              | 1.77             | 0.000504              | 4.00             | 0.294549              | -1.43            |
| JAZF1        | juxtaposed with another zinc finger protei   | 3 92635211 92874362   | 0.050164              | -1.29            | 0.474399              | 1.19             | 0.548812              | 1.11             |
| RIDA         | ribonuclease UK114                           | 8 99254830 99271496   | 0.050164              | -1.36            | 0.147042              | 1.46             | 0.914278              | -1.03            |
| SIRT2        | NAD-dependent protein deacetylase sirtui     | 19 39355490 39380597  | 0.050183              | 1.18             | 0.991049              | 1.00             | 0.392606              | -1.09            |
| UBE2D1       | ubiquitin-conjugating enzyme E2 D1           | 9 77784178 77817704   | 0.050183              | -1.89            | 0.174871              | 2.09             | 0.614793              | 1.24             |
| LOC102133441 | golgin subfamily A member 8B-like isofo      | 7 11173072 11181391   | 0.050184              | -2.47            | 0.399171              | 2.05             | 0.376777              | 1.65             |
| LPCAT2       | lysophosphatidylcholine acyltransferase 2    | 20 43390090 43467380  | 0.050254              | 1.52             | 0.773778              | 1.15             | 0.000003              | 2.45             |
| ZNF592       | zinc finger protein 592 isoform X1           | 7 64982628 65014105   | 0.050321              | 1.18             | 0.654077              | 1.08             | 0.700817              | 1.04             |
| HSDL1        | inactive hydroxysteroid dehydrogenase-lil    | 20 72404804 72411301  | 0.050321              | -1.33            | 0.870857              | 1.06             | 0.698505              | 1.08             |
| LOC102133346 |                                              | 1 188123294 188133998 | 0.050321              | -1.43            | 0.946170              | 1.03             | 0.674018              | 1.10             |
| CCDC43       | coiled-coil domain-containing protein 43     | 16 56477862 56491564  | 0.050349              | 1.22             | 0.912536              | -1.03            | 0.217841              | 1.16             |
| MLLT6        | protein AF-17 isoform X1                     | 16 50198889 50218978  | 0.050349              | 1.13             | 0.011206              | -1.25            | 0.598942              | -1.04            |
| LOC102145510 |                                              | 11 16912292 16955272  | 0.050402              | -3.11            | 0.551212              | -2.48            | 0.030073              | -4.26            |
| MTBP         | mdm2-binding protein isoform X1              | 8 121725853 121803072 | 0.050405              | -1.37            | 0.973449              | 1.02             | 0.353176              | 1.21             |
| ATG5         | autophagy protein 5 isoform X1               | 4 67011254 67136832   | 0.050435              | -1.20            | 0.676701              | 1.09             | 0.660853              | 1.06             |
| FAM167B      | protein FAM167B                              | 1 195755710 195757169 | 0.050474              | 1.60             | 0.103403              | 1.89             | 0.980289              | -1.01            |
| FUZ          | protein fuzzy homolog isoform X5             | 19 50690965 50696629  | 0.050474              | 1.50             | 0.483532              | -1.32            | 0.251714              | -1.33            |
| RASA2        | ras GTPase-activating protein 2 isoform X    | 2 43625698 43746860   | 0.050521              | -1.53            | 0.644927              | 1.23             | 0.807308              | 1.08             |
| FAM188A      | protein FAM188A isoform X2                   | 9 16305426 16385585   | 0.050536              | -1.31            | 0.329284              | 1.28             | 0.796005              | -1.05            |
| NDFIP2       | NEDD4 family-interacting protein 2           | 17 62029504 62095280  | 0.050645              | -1.57            | 0.346545              | 1.48             | 0.665221              | 1.14             |
| LOC102121452 |                                              | 2 88116658 88128088   | 0.050645              | -1.85            | 0.457630              | 1.56             | 0.555401              | 1.27             |
| TIMP4        | metalloproteinase inhibitor 4                | 2 143173442 143178821 | 0.050830              | 4.32             | 0.925561              | 1.25             | 0.968120              | 1.05             |
| WRB          | tail-anchored protein insertion receptor W   | 3 7355450 7371712     | 0.050847              | -1.34            | 0.375112              | 1.27             | 0.934929              | -1.02            |
| TMEM27       | collectrin                                   | X 13452535 13489785   | 0.050847              | -1.76            | 0.346635              | 1.57             | 0.166991              | -1.55            |
| TRA2A        | transformer-2 protein homolog alpha isofo    | 0 4987 34983          | 0.050968              | -1.29            | 0.621380              | 1.14             | 0.909810              | -1.02            |
| ULK2         | serine/threonine-protein kinase ULK2 isofo   | 16 19747341 19847992  | 0.051045              | -1.24            | 0.147883              | 1.30             | 0.116496              | -1.22            |
| DPP4         | dipeptidyl peptidase 4 isoform X2            | 12 50752915 50836108  | 0.051045              | -1.75            | 0.815487              | -1.17            | 0.456614              | -1.31            |
| LOC102135146 | cytochrome c oxidase assembly protein C      | 3 35852260 35858580   | 0.051122              | -1.28            | 0.709392              | 1.11             | 0.286861              | -1.18            |
| MAT2A        | S-adenosylmethionine synthase isoform ty     | 13 23909016 23913828  | 0.051161              | -1.21            | 0.792153              | 1.06             | 0.373604              | -1.11            |
| SFR1         | swi5-dependent recombination DNA repa        | 9 103198721 103202235 | 0.051167              | -1.40            | 0.229333              | -1.44            | 0.505194              | 1.16             |
| C11H12orf80  | LOW QUALITY PROTEIN: uncharacteri            | 11 51075324 51077614  | 0.051190              | 2.85             | 0.370091              | 2.72             | 0.416316              | 1.67             |
| C5H4orf22    | uncharacterized protein C4orf22 homolo       | 5 53505119 54163936   | 0.051267              | 2.70             | 0.683161              | 1.71             | 0.896575              | -1.10            |
| RASGRF2      | ras-specific guanine nucleotide-releasing f  | 6 79243317 79502967   | 0.051267              | 1.33             | 0.015539              | -1.67            | 0.623114              | -1.10            |
| SERINC5      | serine incorporator 5 isoform X1             | 6 78424449 78545369   | 0.051293              | 1.21             | 0.033829              | -1.36            | 0.195507              | 1.16             |
| SCML1        | sex comb on midleg-like protein 1 isoform    | X 15550873 15559965   | 0.051472              | -1.83            | 0.764573              | 1.24             | 0.638666              | 1.21             |
| ARNTL        | aryl hydrocarbon receptor nuclear transloc   | 14 54325462 54403463  | 0.051513              | -1.25            | 0.329979              | -1.22            | 0.538792              | -1.10            |
| LOC102130495 | histone H2A.Z                                | 5 99218444 99220211   | 0.051513              | -1.45            | 0.991951              | -1.01            | 0.636591              | 1.12             |
| LOC102120016 | ATP-binding cassette sub-family B memb       | 7 1617032 1617490     | 0.051513              | -5.19            | 0.234427              | -11.54           | 0.072824              | 10.35            |
| ADH5         | alcohol dehydrogenase class-3 isoform X      | 5 98285017 98310302   | 0.051580              | 1.18             | 0.217670              | 1.20             | 0.701702              | -1.04            |
| LOC107129306 | uncharacterized protein LOC107129306         | 3 175677049 175677890 | 0.051654              | 7.62             | 1.000000              | -3.20            | 0.459030              | -2.14            |
| RTCA         | RNA 3'-terminal phosphate cyclase            | 1 126556764 126581289 | 0.051919              | -1.24            | 0.643022              | 1.11             | 0.900615              | -1.02            |
| MYB          | transcriptional activator Myb                | 4 39494509 39526599   | 0.052093              | 1.79             | 0.728398              | -1.26            | 0.417547              | 1.36             |
| LOC102129464 | Ig heavy chain V-I region 5-like             | 13 19106801 19107303  | 0.052151              | 2.82             | 0.900598              | -1.19            | 0.442723              | 1.65             |
| LOC102126376 | leukocyte immunoglobulin-like receptor s     | 20 5210248 5212431    | 0.052151              | -1.79            | 0.442189              | -1.54            | 0.003869              | -2.45            |
| MYO7A        | unconventional myosin-VIIa isoform X3        | 14 72449807 72533290  | 0.052151              | -1.94            | 0.591229              | -1.45            | 0.618434              | 1.25             |
| ANO5         | anoctamin-5 isoform X4                       | 14 45313963 45410093  | 0.052164              | -1.43            | 0.605609              | 1.18             | 0.858353              | 1.04             |
| MAPK9        | mitogen-activated protein kinase 9 isoform   | 6 180256211 180301640 | 0.052188              | -1.11            | 0.666384              | -1.05            | 0.528623              | -1.04            |
| BBOF1        | basal body-orientation factor 1              | 7 138670417 138717151 | 0.052347              | 1.46             | 0.395331              | 1.37             | 0.889398              | -1.04            |
| DDX42        | ATP-dependent RNA helicase DDX42 iso         | 16 61081260 61115308  | 0.052347              | 1.12             | 0.889972              | -1.02            | 0.791964              | -1.02            |
| SLBP         | histone RNA hairpin-binding protein          | 5 1702649 1727540     | 0.052347              | -1.22            | 0.703357              | -1.09            | 0.588320              | 1.07             |
| GALNT3       | polypeptide N-acetylgalactosaminyltransf     | 12 54604151 54625944  | 0.052347              | -1.70            | 0.998767              | 1.00             | 0.844606              | 1.08             |
| DBI          | acyl-CoA-binding protein isoform X3          | 12 12819750 12825008  | 0.052432              | -1.34            | 0.045442              | -1.58            | 0.186403              | -1.26            |
| RAB11FIP2    | rab11 family-interacting protein 2 isoform   | 9 117223035 117260176 | 0.052565              | -1.34            | 0.198797              | 1.39             | 0.813283              | 1.05             |
| FAM136A      | uncharacterized protein LOC101864806         | 13 39598828 39603942  | 0.052755              | -1.45            | 0.315515              | -1.43            | 0.791858              | 1.07             |
| CEND1        | cell cycle exit and neuronal differentiation | 14 610492 612239      | 0.052829              | 1.83             | 0.516751              | -1.51            | 0.573373              | 1.29             |
| LRBA         | lipopolysaccharide-responsive and beige-l    | 5 149483122 150256956 | 0.052946              | 1.30             | 0.633296              | -1.14            | 0.598730              | 1.10             |
| SPRN         | shadow of prion protein isoform X1           | 9 132901519 132903060 | 0.053011              | 7.01             | 0.686975              | -2.13            | 0.282174              | 2.51             |
| ZSWIM5       | zinc finger SWIM domain-containing prot      | 1 182311792 182507236 | 0.053011              | 1.48             | 0.850130              | 1.10             | 0.791531              | 1.08             |
| C1H1orf50    | uncharacterized protein C1orf50 homolo       | 1 184909971 184918704 | 0.053054              | -1.19            | 0.810325              | -1.05            | 0.518772              | -1.08            |
| PRLR         | prolactin receptor                           | 6 35469492 35492982   | 0.053104              | 2.64             | 0.186771              | 3.10             | 0.783397              | -1.19            |
| FAM131B      | protein FAM131B                              | 3 176537595 176541154 | 0.053104              | 2.40             | 0.360958              | 2.12             | 0.835467              | 1.14             |
| LOC102131130 |                                              | 5 121736748 121739866 | 0.053276              | -1.77            | 0.681374              | 1.28             | 0.227415              | -1.58            |
| LOC107128115 |                                              | 18 31447538 31465764  | 0.053408              | 2.96             | 0.567217              | -2.03            | 0.609575              | -1.49            |
| TMEM196      | transmembrane protein 196 isoform X3         | 3 100950781 100998347 | 0.053439              | 8.32             | 1.000000              | -1.06            | 0.855810              | 1.24             |
| LOC102115852 |                                              | 19 2402733 2623608    | 0.053462              | 1.65             | 0.929174              | -1.07            | 0.806171              | -1.09            |



| Gene symbol  | Gene name                                                      | chr_start_end          | Day3 adjusted P-value | Day3 fold change | Day5 adjusted P-value | Day5 fold change | Day7 adjusted P-value | Day7 fold change |
|--------------|----------------------------------------------------------------|------------------------|-----------------------|------------------|-----------------------|------------------|-----------------------|------------------|
| SS18L2       | SS18-like protein 2                                            | 2 97519728 97523368    | 0.053589              | -1.17            | 0.705940              | 1.07             | 0.612599              | -1.06            |
| P2RY6        | P2Y purinoceptor 6                                             | 14 68523492 68524478   | 0.053589              | -1.77            | 0.890099              | 1.11             | 0.791440              | 1.12             |
| BROX         | BRO1 domain-containing protein BROX                            | 1 81552568 81572069    | 0.053616              | -1.55            | 0.295735              | 1.53             | 0.354326              | 1.30             |
| PDHX         | uncharacterized protein LOC101866848                           | 14 32437652 32510257   | 0.053819              | -1.32            | 0.619325              | 1.16             | 0.614596              | 1.10             |
| ANKRD9       | ankyrin repeat domain-containing protein                       | 7 167744169 167744966  | 0.053855              | -1.44            | 0.948058              | 1.04             | 0.464957              | -1.19            |
| LOC107129830 |                                                                | 5 139788515 139804622  | 0.053875              | -3.06            | 0.560636              | 1.75             | 0.826495              | -1.19            |
| SEZ6L2       | seizure 6-like protein 2 isoform X3                            | 20 28335136 28387222   | 0.053928              | 2.81             | 0.746242              | -1.44            | 0.904642              | 1.09             |
| LOC102137503 | Ig kappa chain V-II region TEW-like                            | 13 17758374 17758883   | 0.053947              | 3.19             | 0.011906              | 32.33            | 0.776799              | -1.21            |
| PLEKHG1      | pleckstrin homology domain-containing f                        | 4 56835823 56994823    | 0.053947              | 1.36             | 0.881100              | 1.06             | 0.960882              | 1.01             |
| BTN2A2       | butyrophilin subfamily 2 member A2 isoform X1                  | 4 144153645 144163388  | 0.053947              | 1.33             | 0.956287              | -1.02            | 0.780731              | -1.06            |
| EXOC4        | exocyst complex component 4 isoform X1                         | 3 166081820 166902438  | 0.053947              | 1.13             | 0.811777              | -1.04            | 0.060626              | 1.13             |
| PBDC1        | protein PBDC1 isoform X2                                       | X 73197793 73202570    | 0.053947              | -1.18            | 0.979469              | -1.01            | 0.372502              | -1.10            |
| TRAPP3       | trafficking protein particle complex subunit 3                 | 6 65436538 65476836    | 0.053947              | -1.31            | 0.388442              | 1.25             | 0.792230              | 1.05             |
| AGFG1        | uncharacterized protein LOC101866902                           | 12 117289205 117352646 | 0.053947              | -1.53            | 0.573089              | 1.28             | 0.707492              | 1.12             |
| LOC102135565 | neuroblastoma breakpoint family member 1                       | 1 414 2206             | 0.053947              | -2.90            | 0.184246              | -3.43            | 0.782852              | -1.23            |
| STK33        | serine/threonine-protein kinase 33 isoform X1                  | 14 59282513 59453733   | 0.053952              | 2.28             | 0.979974              | 1.04             | 0.268991              | -1.85            |
| LOC107126753 |                                                                | 11 87232831 87245282   | 0.053952              | -1.55            | 0.341739              | 1.51             | 0.400485              | 1.25             |
| TFIP11       | tuftelin-interacting protein 11                                | 10 25013125 25030726   | 0.054055              | 1.19             | 0.780940              | -1.06            | 0.661646              | -1.05            |
| PSMA6        | uncharacterized protein LOC101866963                           | 7 99238140 99266676    | 0.054131              | -1.26            | 0.900485              | -1.04            | 0.699682              | 1.06             |
| LOC102126622 | protein PMS2CL                                                 | 3 42111171 42117547    | 0.054133              | 1.30             | 0.348295              | -1.26            | 0.773034              | -1.06            |
| ORMDL1       | uncharacterized protein LOC101867514                           | 12 78942257 78953132   | 0.054133              | -1.37            | 0.172248              | 1.45             | 0.418405              | 1.18             |
| SH3BGR1      | SH3 domain-binding glutamic acid-rich-like protein 1           | X 78191760 78285515    | 0.054147              | -1.70            | 0.150797              | 1.93             | 0.273238              | 1.44             |
| MFSD6L       | major facilitator superfamily domain-containing protein 6-like | 16 89266016 8927776    | 0.054156              | 4.58             | 0.579596              | -2.84            | 0.425769              | -2.24            |
| PNMAL2       | PNMA-like protein 2                                            | 19 47262997 47264901   | 0.054186              | 2.44             | 0.443218              | -1.95            | 0.206026              | 2.00             |
| ZBTB80S      | protein archaese isoform X1                                    | 1 195322290 195356955  | 0.054192              | -1.22            | 0.791694              | -1.07            | 0.816258              | 1.03             |
| COQ7         | 5-demethoxyubiquinone hydroxylase, mitochondrial               | 20 18425059 18435747   | 0.054356              | 1.37             | 0.437594              | -1.27            | 0.271290              | 1.24             |
| LGI4         | leucine-rich repeat LGI family member 4                        | 19 35567046 35581987   | 0.054400              | 1.79             | 0.646859              | 1.34             | 0.675303              | -1.18            |
| LOC102146235 | protein argonaute-1 isoform X2                                 | 1 191946609 191983568  | 0.054400              | 1.14             | 0.510511              | -1.09            | 0.470304              | 1.06             |
| LOC102137553 | protein phosphatase 1 regulatory inhibitor 1                   | 16 32681863 32705037   | 0.054457              | 1.61             | 0.791192              | 1.17             | 0.288460              | 1.37             |
| C11H12orf29  | uncharacterized protein C11orf29 homolog                       | 11 91553259 91574470   | 0.054457              | -1.33            | 0.477712              | 1.22             | 0.844176              | -1.04            |
| DYRK2        | dual specificity tyrosine-phosphorylation-kinase 2             | 11 66696274 66697860   | 0.054491              | -1.49            | 0.795938              | 1.13             | 0.358852              | 1.26             |
| ENY2         | transcription and mRNA export factor ENY2                      | 8 110454628 110463857  | 0.054559              | -1.20            | 0.578069              | -1.11            | 0.634848              | -1.06            |
| CDH5         | cadherin-5                                                     | 20 54482354 54506094   | 0.054587              | 1.42             | 0.111722              | 1.59             | 0.404874              | 1.21             |
| RNF2         | E3 ubiquitin-protein ligase RING2 isoform X1                   | 1 43003590 43047174    | 0.054644              | -1.35            | 0.780365              | 1.11             | 0.186403              | 1.28             |
| CD164        | sialomucin core protein 24 isoform X3                          | 4 13275852 13289809    | 0.054689              | -1.82            | 0.289491              | 1.79             | 0.530020              | 1.28             |
| ELMSAN1      | ELM2 and SANT domain-containing protein 1                      | 7 138345133 138367132  | 0.054715              | 1.30             | 0.523602              | 1.19             | 0.084157              | 1.30             |
| RAB23        | ras-related protein Rab-23                                     | 4 113447117 113466201  | 0.054715              | -1.34            | 0.002661              | 1.87             | 0.196654              | 1.26             |
| LOC102142606 | uncharacterized protein LOC102142606 isoform X1                | 20 44687536 44689401   | 0.054720              | -1.96            | 0.341926              | -1.71            | 0.203285              | 1.82             |
| MATN2        | matrilin-2 isoform X1                                          | 8 99035693 99187904    | 0.054727              | 2.03             | 0.756266              | -1.29            | 0.716123              | -1.20            |
| TMEM255B     | transmembrane protein 255B                                     | 17 96191434 96232004   | 0.054745              | 1.79             | 0.577741              | 1.42             | 0.518820              | -1.28            |
| FAM120A      | LOW QUALITY PROTEIN: constitutive                              | 15 107512722 107625655 | 0.054745              | -1.28            | 0.557811              | 1.16             | 0.477768              | 1.12             |
| GRIPAP1      | GRIP1-associated protein 1 isoform X2                          | X 47507656 47538045    | 0.054780              | 1.16             | 0.562592              | -1.09            | 0.355333              | -1.09            |
| ARMC1        | armadillo repeat-containing protein 1 isoform X1               | 8 66811178 66830536    | 0.054780              | -1.46            | 0.162867              | 1.58             | 0.194906              | 1.35             |
| ALG13        | putative bifunctional UDP-N-acetylglucosaminyl 4-epimerase     | X 108752472 108833871  | 0.054820              | -1.33            | 0.444652              | 1.24             | 0.951764              | 1.01             |
| RAD54L2      | helicase ARIP4 isoform X1                                      | 2 106795511 106865369  | 0.054848              | 1.25             | 0.869297              | -1.05            | 0.417844              | 1.12             |
| SOCS5        | suppressor of cytokine signaling 5                             | 13 63622539 63624149   | 0.054848              | -1.52            | 0.075238              | 1.84             | 0.570873              | 1.17             |
| RSPH1        | radial spoke head 1 homolog                                    | 3 4267188 4288972      | 0.054898              | 5.33             | 0.974246              | 1.09             | 0.361978              | -2.68            |
| KRT5         | keratin, type II cytoskeletal 5                                | 11 51362372 51367763   | 0.055075              | 5.54             | 0.642234              | 2.42             | 0.203386              | -3.86            |
| CCDC17       | coiled-coil domain-containing protein 17                       | 1 181950044 181953611  | 0.055137              | 1.70             | 0.150931              | -1.95            | 0.000238              | -2.62            |
| TNFRSF18     | tumor necrosis factor receptor superfamily member 18           | 1 227209803 227212550  | 0.055137              | 1.65             | 0.520208              | -1.38            | 0.846456              | -1.07            |
| PPP2R5E      | serine/threonine-protein phosphatase 2A subunit regulatory B   | 7 127700688 127867250  | 0.055137              | -1.27            | 0.521368              | 1.17             | 0.340846              | 1.16             |
| UFM1         | ubiquitin-fold modifier 1 isoform X1                           | 17 17705090 17715941   | 0.055137              | -1.46            | 0.684858              | 1.19             | 0.533119              | 1.17             |
| IKBK1        | inhibitor of nuclear factor kappa-B kinase subunit 1           | 8 43270531 43326749    | 0.055191              | -1.15            | 0.813373              | -1.04            | 0.728255              | 1.03             |
| TSNAXIP1     | translin-associated factor X-interacting protein 1             | 20 56006623 56030857   | 0.055223              | 3.11             | 0.912228              | -1.22            | 0.575194              | -1.58            |
| PTP4A3       | protein tyrosine phosphatase type IVA 3 isoform X1             | 8 142883575 142891670  | 0.055223              | -1.41            | 0.655049              | 1.18             | 0.095604              | -1.40            |
| TICAM2       | toll-like receptor adaptor molecule 2                          | 6 114417613 114418320  | 0.055223              | -1.51            | 0.859303              | 1.10             | 0.000532              | 2.03             |
| ABHD4        | abhydrolase domain-containing protein 4                        | 7 86274941 86287245    | 0.055256              | 1.21             | 0.011906              | -1.44            | 0.494050              | -1.09            |
| PREX2        | phosphatidylinositol 3,4,5-trisphosphate-dependent kinase 2    | 8 69185463 69461711    | 0.055332              | 1.43             | 0.247031              | 1.47             | 0.101647              | 1.42             |
| PPP5K1       | serine/threonine-protein phosphatase 5                         | 7 20521158 20578706    | 0.055341              | 1.29             | 0.880087              | -1.05            | 0.573222              | -1.11            |
| NKAIN2       | sodium/potassium-transporting ATPase subunit alpha-2           | 4 27844961 28879985    | 0.055400              | 3.27             | 0.125995              | 4.63             | 0.832721              | 1.20             |
| FAM179A      | LOW QUALITY PROTEIN: protein FAM179A                           | 13 81747286 81805303   | 0.055530              | 4.36             | 0.529707              | 2.94             | 0.985794              | -1.02            |
| SDHAF3       | succinate dehydrogenase assembly factor 3                      | 3 114784724 114870432  | 0.055580              | -1.23            | 0.813373              | -1.07            | 0.762287              | 1.05             |
| LDB1         | LIM domain-binding protein 1 isoform X1                        | 9 101099513 101114527  | 0.055586              | 1.36             | 0.686854              | -1.15            | 0.858353              | -1.04            |
| APOBEC3A     | DNA dC->dU-editing enzyme APOBEC3A                             | 10 12263221 12268858   | 0.055589              | -2.52            | 0.853391              | -1.25            | 0.530326              | -1.47            |
| CD300LB      | CMRF35-like molecule 7                                         | 16 71759092 71767670   | 0.055607              | 2.95             | 0.464675              | -2.20            | 0.993595              | -1.01            |
| NAA30        | N-alpha-acetyltransferase 30                                   | 7 121645094 121662905  | 0.055607              | -1.51            | 0.337034              | 1.45             | 0.444785              | 1.23             |
| SLA2         | src-like-adaptor 2 isoform X1                                  | 10 68167230 68199586   | 0.055751              | 1.43             | 0.953349              | -1.03            | 0.526479              | -1.16            |
| VMAC         | vimentin-type intermediate filament-associated protein 1       | 19 6053686 6058555     | 0.055760              | 1.64             | 0.754553              | 1.21             | 0.966592              | 1.02             |
| ZFP69        | zinc finger protein ZFP69 isoform X2                           | 1 187223144 187239739  | 0.055771              | -1.21            | 0.814376              | 1.06             | 0.421459              | 1.11             |
| AGO3         | protein argonaute-3 isoform X1                                 | 1 191808152 191934529  | 0.055963              | -1.28            | 0.800876              | 1.08             | 0.552525              | -1.11            |
| LARP6        | la-related protein 6                                           | 7 48629938 48652439    | 0.056038              | 1.49             | 0.628935              | -1.23            | 0.956695              | 1.02             |
| CCDC148      | coiled-coil domain-containing protein 148                      | 12 46933514 47211194   | 0.056381              | 2.94             | 0.802585              | 1.41             | 0.946922              | 1.06             |
| SUB1         | activated RNA polymerase II transcription factor 1             | 6 33282279 33295175    | 0.056384              | -1.27            | 0.699078              | 1.11             | 0.369972              | 1.15             |
| LOC102140635 |                                                                | 20 40347065 40351281   | 0.056424              | 3.31             | 0.526715              | 2.83             | 0.627189              | 1.58             |
| FOXP3        | forkhead box protein P3 isoform X4                             | X 47785648 47799127    | 0.056549              | 1.49             | 0.964585              | 1.03             | 0.287784              | 1.28             |
| APOBR        | apolipoprotein B receptor                                      | 20 27630275 27633987   | 0.056658              | 1.31             | 0.929287              | -1.04            | 0.390063              | 1.16             |
| CCDC60       | coiled-coil domain-containing protein 60                       | 11 123190158 123403475 | 0.056663              | 4.69             | 0.533725              | 4.36             | 0.891072              | 1.19             |
| ENGASE       | cytosolic endo-beta-N-acetylglucosaminidase 1                  | 16 76424904 76436154   | 0.056686              | 1.33             | 0.656454              | -1.15            | 0.402437              | -1.17            |
| C1H1orf198   | uncharacterized protein C1orf198 homolog                       | 1 18700155 18728357    | 0.056909              | 1.27             | 0.153091              | 1.34             | 0.437413              | -1.13            |
| MAD2L1BP     | MAD2L1-binding protein                                         | 4 126912127 126916783  | 0.056909              | -1.16            | 0.479562              | -1.11            | 0.137694              | -1.15            |
| LOC107129787 |                                                                | 5 86495862 86506148    | 0.056994              | -4.37            | 1.000000              | -1.06            | 0.616296              | 1.57             |
| OSBP         | oxysterol-binding protein 1                                    | 14 14439407 14480015   | 0.057056              | 1.21             | 0.917945              | -1.03            | 0.678227              | 1.06             |
| CARHSP1      | calcium-regulated heat stable protein 1 isoform X1             | 20 9146708 9158298     | 0.057056              | 1.21             | 0.574553              | 1.12             | 0.798803              | -1.04            |
| NCOR2        | nuclear receptor corepressor 2 isoform X3                      | 11 128686525 128855826 | 0.057056              | 1.16             | 0.613389              | -1.09            | 0.388333              | -1.09            |
| CLDN6        | claudin-6                                                      | 20 3291587 3292249     | 0.057056              | -13.94           | 0.142817              | -18.90           | 0.931219              | -1.15            |
| PSKH1        | serine/threonine-protein kinase H1                             | 20 56116370 56137515   | 0.057067              | 1.22             | 0.859496              | -1.05            | 0.677751              | -1.06            |
| ATP5S        | ATP synthase subunit s, mitochondrial isoform X1               | 7 114528582 114541260  | 0.057167              | 1.36             | 0.471063              | 1.26             | 0.224218              | 1.27             |

| Gene symbol  | Gene name                                    | chr_start_end          | Day3 adjusted P-value | Day3 fold change | Day5 adjusted P-value | Day5 fold change | Day7 adjusted P-value | Day7 fold change |
|--------------|----------------------------------------------|------------------------|-----------------------|------------------|-----------------------|------------------|-----------------------|------------------|
| BUB3         | mitotic checkpoint protein BUB3 isoform      | 9 122434705 122444853  | 0.057167              | -1.37            | 0.990598              | -1.01            | 0.476902              | 1.16             |
| PHOSPHO2     | pyridoxal phosphate phosphatase PHOSP        | 12 58578408 58579133   | 0.057167              | -1.46            | 0.329312              | 1.42             | 0.763667              | 1.09             |
| PTX3         | pentraxin-related protein PTX3               | 2 59824374 59830278    | 0.057167              | -3.43            | 0.428692              | 2.61             | 0.315566              | -2.21            |
| LOC107130061 |                                              | 6 126504514 126507609  | 0.057290              | -2.03            | 0.978777              | -1.03            | 0.431010              | 1.43             |
| ATAD2B       | ATPase family AAA domain-containing p        | 13 87041493 87272112   | 0.057444              | -1.30            | 0.672694              | 1.13             | 0.850043              | 1.04             |
| KPTN         | kaptein                                      | 19 48299451 48308966   | 0.057477              | -1.38            | 0.486860              | -1.26            | 0.367898              | -1.21            |
| FAM159A      | membrane protein FAM159A isoform X1          | 1 174839723 174862924  | 0.057570              | 3.27             | 0.103352              | -7.09            | 0.965144              | -1.04            |
| NBL1         | neuroblastoma suppressor of tumorigenic      | 1 208770334 208783122  | 0.057596              | 1.30             | 0.035825              | -1.55            | 0.476581              | -1.13            |
| LRRC46       | leucine-rich repeat-containing protein 46    | 16 33151995 33157173   | 0.057726              | 2.59             | 0.688126              | -1.54            | 0.528623              | -1.51            |
| TMEM2        | transmembrane protein 2 isoform X2           | 15 82437975 82507739   | 0.057792              | 1.55             | 0.023412              | 2.18             | 0.999236              | -1.00            |
| LOC102130747 | cytochrome c-type heme lyase                 | X 8815632 8825390      | 0.057792              | -1.29            | 0.575151              | 1.17             | 0.870412              | 1.03             |
| LOC107127540 | LOW QUALITY PROTEIN: uncharacteri            | 15 100943881 100944451 | 0.057871              | 3.09             | 0.936995              | 1.13             | 0.082351              | -4.17            |
| WIZ          | protein Wiz isoform X3                       | 19 15728527 15753915   | 0.058039              | 1.15             | 0.577449              | -1.09            | 0.939295              | -1.01            |
| CNTN2        | contactin-2                                  | 1 63554039 63574685    | 0.058040              | 4.70             | 0.200984              | -3.27            | 0.871675              | -1.12            |
| C15H9orf50   | uncharacterized protein C9orf50 homolog      | 15 7327 14792          | 0.058040              | 3.14             | 0.914234              | 1.19             | 0.555685              | -1.55            |
| ST8SIA1      | alpha-N-acetylneuraminide alpha-2,8-sial     | 11 22877176 23014184   | 0.058040              | 1.49             | 0.727216              | 1.18             | 0.920700              | -1.03            |
| STARD8       | star-related lipid transfer protein 8 isofor | X 65654622 65733550    | 0.058040              | 1.35             | 0.007314              | 1.84             | 0.828074              | 1.05             |
| TRIM26       | tripartite motif-containing protein 26 isof  | 4 140757129 140769881  | 0.058040              | 1.19             | 0.614346              | -1.10            | 0.876501              | -1.02            |
| OTUD4        | OTU domain-containing protein 4 isoform      | 5 144261509 144315062  | 0.058040              | -1.33            | 0.092740              | 1.50             | 0.678379              | 1.09             |
| C4BPB        | C4b-binding protein beta chain isoform X     | 1 65668354 65678640    | 0.058068              | 3.32             | 0.778436              | 1.57             | 0.583275              | 1.63             |
| NUFIP1       | nuclear fragile X mental retardation-intera  | 17 24155054 24213074   | 0.058068              | -1.34            | 0.596504              | 1.18             | 0.978457              | -1.01            |
| HNRNPUL1     | heterogeneous nuclear ribonucleoprotein U    | 19 41827026 41872357   | 0.058167              | 1.20             | 0.310649              | -1.19            | 0.535504              | 1.08             |
| TRPM8        | transient receptor potential cation channel  | 12 123752814 123843385 | 0.058201              | 3.02             | 0.576171              | -1.60            | 0.298240              | -1.79            |
| PSMA1        | proteasome subunit alpha type-1 isoform      | 14 53124179 53230498   | 0.058321              | -1.21            | 0.986857              | -1.01            | 0.513361              | 1.09             |
| C10H22orf23  | UPF0193 protein EVG1 isoform X2              | 10 13258551 13266985   | 0.058386              | 4.12             | 0.819069              | 1.64             | 0.365982              | -2.55            |
| SOAT2        | sterol O-acyltransferase 2 isoform X1        | 11 51955431 51968951   | 0.058386              | -1.42            | 0.026896              | -1.86            | 0.107198              | -1.42            |
| CFH          | complement factor H isoform X7               | 1 54927304 55103908    | 0.058410              | 1.40             | 0.363109              | -1.34            | 0.045912              | 1.47             |
| ADCK4        | aaarf domain-containing protein kinase 4 i   | 19 41205521 41231181   | 0.058410              | 1.21             | 0.289491              | -1.21            | 0.130825              | -1.19            |
| RWDD4        | RWD domain-containing protein 4 isofor       | 5 183036059 183052760  | 0.058571              | -1.29            | 0.045926              | 1.50             | 0.233921              | 1.21             |
| CTNBP1       | beta-catenin-interacting protein 1 isoform   | 1 218312431 218374066  | 0.058615              | -1.21            | 0.329312              | -1.19            | 0.330730              | -1.12            |
| KIAA0355     | uncharacterized protein LOC101925994         | 19 34746100 34797686   | 0.058646              | 1.32             | 0.385680              | 1.26             | 0.900412              | 1.03             |
| KCNE4        | LOW QUALITY PROTEIN: potassium v             | 12 112814459 112815671 | 0.058770              | 1.70             | 0.021165              | 2.75             | 0.668883              | 1.17             |
| JAKMIP2      | janus kinase and microtubule-interacting p   | 6 146850211 146932694  | 0.058785              | 2.74             | 0.388909              | -2.32            | 0.787658              | 1.22             |
| LOC102129423 |                                              | 19 43291060 43660546   | 0.058845              | -6.35            | 1.000000              | -1.07            | 0.930470              | 1.11             |
| SOX2         | transcription factor SOX-2                   | 2 86337647 86338606    | 0.058858              | 4.92             | 0.985599              | 1.05             | 0.727153              | -1.49            |
| LOC101866521 | serotransferrin                              | 2 35925255 35957347    | 0.058894              | 2.02             | 0.581154              | 1.51             | 0.005208              | 2.84             |
| TIAM1        | T-lymphoma invasion and metastasis-indu      | 3 15507370 15655445    | 0.058949              | 1.38             | 0.775989              | -1.12            | 0.995876              | 1.00             |
| LOC102122290 |                                              | X 5531195 5991137      | 0.058982              | -2.17            | 0.506832              | 1.69             | 0.238510              | -1.77            |
| AQP6         | aquaporin-6 isoform X2                       | 11 48829286 48831996   | 0.059321              | 8.90             | 1.000000              | -2.14            | 0.244918              | -6.06            |
| ZNF148       | zinc finger protein 148                      | 2 146825682 146899200  | 0.059358              | -1.36            | 0.103684              | 1.52             | 0.284004              | 1.23             |
| RNFT1        | RING finger and transmembrane domain-        | 16 45527714 45539986   | 0.059363              | -1.49            | 0.917476              | 1.06             | 0.617326              | 1.15             |
| RGP1         | RAB6A-GEF complex partner protein 2 i        | 15 43357632 43361084   | 0.059405              | 1.19             | 0.961614              | -1.01            | 0.720820              | -1.05            |
| SDSL         | serine dehydratase-like isoform X1           | 11 117146710 117167807 | 0.059405              | -1.35            | 0.000000              | -2.57            | 0.003509              | -1.55            |
| LOC102124108 |                                              | 2 14781121 14798710    | 0.059405              | -3.79            | 0.691731              | 1.76             | 0.460183              | 1.92             |
| LOC107126796 |                                              | 11 125409031 125410385 | 0.059422              | -1.61            | 0.073194              | 2.07             | 0.674351              | -1.17            |
| SRSF12       | serine/arginine-rich splicing factor 12 isof | 4 84876182 84895677    | 0.059455              | -1.58            | 0.751819              | -1.19            | 0.619466              | -1.16            |
| LOC102119743 | C-C motif chemokine 3-like                   | 16 39727 41102         | 0.059516              | -2.42            | 0.464525              | -1.92            | 0.966419              | -1.03            |
| OTOG         | otogelin                                     | 14 50080404 50118508   | 0.059702              | 3.68             | 0.006816              | 13.96            | 0.961142              | -1.06            |
| IKZF5        | zinc finger protein Pegasus                  | 9 122278726 122283565  | 0.059702              | -1.42            | 0.055752              | 1.73             | 0.625421              | 1.12             |
| LOC102143642 |                                              | 4 26773907 26778162    | 0.059708              | 2.18             | 0.912077              | 1.12             | 0.406904              | 1.52             |
| PGM3         | phosphoacetylglucosamine mutase isofor       | 4 90677115 90699335    | 0.059708              | -1.34            | 0.906697              | -1.03            | 0.969129              | -1.01            |
| MND1         | meiotic nuclear division protein 1 homolo    | 5 152580089 152648699  | 0.059708              | -1.70            | 0.671579              | -1.28            | 0.643196              | -1.19            |
| ATP6AP1L     | V-type proton ATPase subunit S1-like pro     | 6 80572456 80588035    | 0.059708              | -1.74            | 0.885676              | 1.11             | 0.409716              | 1.35             |
| DYDC2        | DPY30 domain-containing protein 2            | 9 55564997 55569410    | 0.059712              | 9.28             | 0.959075              | 1.23             | 0.924825              | -1.19            |
| LOC102147000 | golgin subfamily A member 6-like protein     | 19 19784119 19791284   | 0.059712              | 4.37             | 0.681824              | -1.59            | 0.929905              | 1.08             |
| LOC102128519 |                                              | 18 59103194 59118742   | 0.059712              | 2.36             | 0.940765              | -1.09            | 0.312343              | -1.67            |
| DNAJC9       | dnaJ homolog subfamily C member 9 iso        | 9 62305342 62320173    | 0.059712              | -1.17            | 0.793442              | -1.05            | 0.624964              | -1.05            |
| SPTBN4       | spectrin beta chain, non-erythrocytic 4      | 19 40963685 41083584   | 0.059712              | -1.39            | 0.000081              | -2.62            | 0.440645              | -1.19            |
| ZDHHC20      | probable palmitoyltransferase ZDHHC20        | 17 2002107 2008039     | 0.059712              | -1.59            | 0.960153              | 1.04             | 0.233824              | 1.41             |
| LOC102134385 |                                              | 7 84599456 84605851    | 0.059717              | 3.61             | 0.693558              | 1.70             | 0.277546              | 2.42             |
| LOC102130471 | ankyrin repeat domain-containing protein     | 20 34134112 34218110   | 0.059717              | 2.63             | 0.010327              | 6.69             | 0.029584              | -3.29            |
| ARMCX3       | armadillo repeat-containing X-linked prot    | X 98762046 98763185    | 0.060007              | -1.37            | 0.300651              | 1.36             | 0.629475              | 1.11             |
| SLC19A2      | thiamine transporter 1 isoform X1            | 1 27422289 27438309    | 0.060007              | -1.42            | 0.665995              | 1.18             | 0.871015              | 1.04             |
| LOC107130034 |                                              | 6 95214273 95221194    | 0.060007              | -3.37            | 0.395828              | 2.70             | 0.623956              | 1.50             |
| CEP44        | centrosomal protein of 44 kDa isoform X      | 5 173551508 173581807  | 0.060066              | -1.23            | 0.658921              | -1.11            | 0.482120              | 1.11             |
| ZNF660       | zinc finger protein 660                      | 2 99582310 99583305    | 0.060085              | 1.57             | 0.342041              | 1.50             | 0.607043              | -1.17            |
| CD19         | B-lymphocyte antigen CD19 isoform X3         | 20 27396251 27403852   | 0.060310              | 2.10             | 0.196931              | -2.42            | 0.934358              | 1.05             |
| LOC102146302 |                                              | 12 18288816 18291040   | 0.060392              | -2.14            | 0.282040              | 2.11             | 0.215695              | -1.79            |
| MFG8         | milk fat globule-EGF factor 8 protein pre    | 7 69110728 69124700    | 0.060396              | 1.67             | 0.215839              | -1.78            | 0.575460              | -1.22            |
| LOC101865722 |                                              | 8 58025462 58029486    | 0.060396              | -1.27            | 0.010798              | 1.59             | 0.599866              | 1.09             |
| TAF5         | transcription initiation factor TFIIID subun | 9 102423859 102446003  | 0.060455              | -1.19            | 0.816917              | 1.06             | 0.927551              | -1.01            |
| FMO2         | dimethylamine monoxygenase [N-oxide          | 1 29147125 29167714    | 0.060543              | 1.71             | 0.755129              | 1.22             | 0.957256              | 1.03             |
| FBXO42       | F-box only protein 42 isoform X1             | 1 212104911 212171239  | 0.060543              | -1.11            | 0.085276              | -1.17            | 0.791964              | 1.02             |
| ELP6         | elongator complex protein 6                  | 2 102541731 102559958  | 0.060543              | -1.27            | 0.131806              | -1.37            | 0.510738              | -1.11            |
| MORN3        | MORN repeat-containing protein 3             | 11 125676225 125695427 | 0.060544              | 2.88             | 0.615515              | -1.97            | 0.859666              | 1.17             |
| RAB3C        | ras-related protein Rab-3C isoform X1        | 6 58075084 58360685    | 0.060544              | 2.37             | 0.832487              | -1.33            | 0.813374              | -1.16            |
| KIAA1644     | uncharacterized protein KIAA1644 homo        | 10 6694983 6751519     | 0.060544              | 2.36             | 0.293629              | 2.34             | 0.710680              | -1.25            |
| FZD9         | frizzled-9                                   | 3 48062234 48064009    | 0.060544              | 2.33             | 0.215284              | 2.56             | 0.900615              | -1.09            |
| CBX7         | chromobox protein homolog 7 isoform X        | 10 12052838 12071659   | 0.060544              | 1.61             | 0.849552              | 1.13             | 0.716275              | -1.13            |
| CGGBP1       | CGG triplet repeat binding protein 1         | 2 180113654 180114161  | 0.060574              | -1.37            | 0.327904              | 1.34             | 0.375479              | 1.20             |
| SEMA4B       | semaphorin-4B isoform X1                     | 7 70512257 70539240    | 0.060892              | 1.30             | 0.414176              | -1.24            | 0.239377              | 1.22             |
| EIF3L        |                                              | 10 13326308 13368594   | 0.060892              | 1.20             | 0.215329              | -1.23            | 0.667976              | -1.06            |
| LOC102133162 | uncharacterized protein C22orf15 homolo      | 0 196219 198670        | 0.061043              | 4.65             | 0.879782              | -1.43            | 0.329598              | -2.73            |
| DRC1         | dynein regulatory complex protein 1          | 13 84433570 84488946   | 0.061043              | 3.04             | 0.598121              | -1.89            | 0.084319              | -3.16            |
| LUZP6        | leucine zipper protein 6                     | 3 168900407 168902127  | 0.061043              | -1.64            | 0.189849              | 1.79             | 0.476625              | 1.26             |
| WNT6         | protein Wnt-6 isoform X1                     | 12 108552118 108557060 | 0.061220              | 2.48             | 0.845810              | -1.37            | 0.825602              | 1.22             |
| TTL7         | tubulin polyglutamylase TTL7                 | 1 143311362 143394158  | 0.061320              | -1.36            | 0.358660              | -1.32            | 0.692538              | -1.09            |

| Gene symbol  | Gene name                                  | chr_start_end          | Day3 adjusted P-value | Day3 fold change | Day5 adjusted P-value | Day5 fold change | Day7 adjusted P-value | Day7 fold change |
|--------------|--------------------------------------------|------------------------|-----------------------|------------------|-----------------------|------------------|-----------------------|------------------|
| LOC101865018 | aldo-keto reductase family 1 member B10    | 3 167386840 167399647  | 0.061350              | -1.46            | 0.000170              | -2.69            | 0.268374              | 1.30             |
| AKNA         | AT-hook-containing transcription factor is | 15 23198136 23240945   | 0.061405              | 1.31             | 0.130012              | -1.42            | 0.061508              | 1.34             |
| PARP1        | poly [ADP-ribose] polymerase 1             | 1 85217888 85264218    | 0.061405              | 1.28             | 0.881958              | 1.05             | 0.265739              | 1.19             |
| GTF2H1       | general transcription factor IIH subunit 1 | 14 49315211 49335312   | 0.061405              | -1.20            | 0.938396              | 1.02             | 0.722259              | 1.05             |
| TFB1M        | dimethyladenosine transferase 1, mitocho   | 4 61602030 61655916    | 0.061654              | -1.23            | 0.954110              | -1.02            | 0.749525              | -1.05            |
| AMMECR1      | AMME syndrome candidate gene 1 prote       | X 107329013 107458560  | 0.061662              | -1.32            | 0.735662              | 1.12             | 0.702877              | 1.08             |
| RSBN1        | round spermatid basic protein 1            | 1 112961864 113009566  | 0.061844              | -1.43            | 0.131654              | 1.60             | 0.299267              | 1.27             |
| AK7          | adenylate kinase 7                         | 7 161481871 161586883  | 0.061876              | 4.99             | 0.913575              | 1.33             | 0.555591              | -1.98            |
| LOC107129415 |                                            | 4 38632306 38651968    | 0.061906              | 2.60             | 0.803911              | -1.41            | 0.048265              | 3.41             |
| LOC102146685 |                                            | 13 39550620 39555393   | 0.061938              | 2.84             | 0.329636              | 3.30             | 0.730623              | -1.29            |
| C1R          | complement C1r subcomponent                | 11 7412536 7495768     | 0.061938              | 1.38             | 0.314390              | -1.36            | 0.667948              | 1.10             |
| ADCYAP1      | LOW QUALITY PROTEIN: pituitary ad          | 18 62154514 62160557   | 0.061967              | 2.04             | 0.930516              | 1.10             | 0.000000              | -6.12            |
| LOC102144397 | leukocyte immunoglobulin-like receptor s   | 19 55598182 55601011   | 0.061987              | 2.94             | 0.225047              | -3.30            | 0.278210              | 2.12             |
| CRMP1        | dihydropyrimidinase-related protein 1 iso  | 5 7082761 7150378      | 0.061987              | 1.99             | 0.516832              | -1.59            | 0.239342              | 1.66             |
| LOC102136297 | Ig lambda chain V-1 region BL2-like isofc  | 10 28438839 29131785   | 0.061987              | 1.89             | 0.930434              | 1.09             | 0.936421              | -1.04            |
| SIPA1L3      | signal-induced proliferation-associated 1- | 19 38487400 38622610   | 0.061987              | 1.26             | 0.453732              | -1.19            | 0.598876              | -1.09            |
| TMEM126A     | transmembrane protein 126A                 | 14 81219411 81226023   | 0.061987              | -1.24            | 0.865661              | 1.05             | 0.865452              | -1.03            |
| LOC107129149 | T-cell receptor beta chain V region CTL-I  | 3 175427624 175429895  | 0.061987              | -164.42          | 1.000000              | 1.00             | 0.978704              | -1.11            |
| DUSP11       | RNA/RNP complex-1-interacting phosph       | 13 36139053 36158603   | 0.062140              | -1.23            | 0.943726              | -1.02            | 0.951068              | -1.01            |
| CSPG4        | chondroitin sulfate proteoglycan 4         | 7 53867246 53881535    | 0.062199              | 1.47             | 0.771702              | 1.15             | 0.435809              | 1.22             |
| FAM221B      | protein FAM221B isoform X3                 | 15 43284139 43291611   | 0.062277              | 2.14             | 0.811994              | -1.30            | 0.498446              | -1.43            |
| C4H6orf1     | uncharacterized protein C6orf1 homolog     | 4 136570919 136572462  | 0.062304              | -1.33            | 0.556013              | -1.19            | 0.375631              | -1.18            |
| B4GALT6      | beta-1,4-galactosyltransferase 6 isoform X | 18 50587967 50648583   | 0.062321              | -1.77            | 0.017716              | 2.90             | 0.838912              | -1.09            |
| PPP2R3C      | serine/threonine-protein phosphatase 2A r  | 7 99035775 99070651    | 0.062350              | -1.22            | 0.866742              | 1.05             | 0.695878              | -1.06            |
| AURKC        | aurora kinase C                            | 19 57886801 57891675   | 0.062410              | -2.47            | 0.027733              | -5.13            | 0.903112              | 1.09             |
| TRIM56       | E3 ubiquitin-protein ligase TRIM56         | 3 45399231 45401498    | 0.062534              | 1.37             | 0.356989              | 1.33             | 0.426118              | 1.18             |
| KIAA0430     | meiosis arrest female protein 1 isoform X  | 20 15639824 15681726   | 0.062534              | 1.21             | 0.988314              | -1.00            | 0.996453              | 1.00             |
| TMPO         | thymopoietin isoform X2                    | 11 102218893 102251909 | 0.062534              | -1.39            | 0.674994              | 1.17             | 0.347322              | 1.22             |
| CTBS         | uncharacterized protein LOC101865724 p     | 1 142684043 142702766  | 0.062534              | -1.48            | 0.924840              | -1.06            | 0.491458              | 1.20             |
| LOC102136102 | 39S ribosomal protein L49, mitochondria    | 6 113643274 113643717  | 0.062575              | 2.46             | 0.300687              | 2.35             | 0.778975              | 1.19             |
| LOC107127609 |                                            | 15 23492041 23497004   | 0.062714              | 2.92             | 0.613521              | -1.74            | 0.911278              | 1.10             |
| UNC13A       | protein unc-13 homolog A                   | 19 17939066 18032065   | 0.062714              | 2.21             | 0.677945              | -1.60            | 0.366149              | -1.68            |
| LOC107130504 |                                            | 7 170185216 170187252  | 0.062714              | 1.51             | 0.024098              | 2.13             | 0.118738              | -1.48            |
| ZC3H3        | zinc finger CCCH domain-containing pro     | 8 145064789 145162521  | 0.062714              | 1.26             | 0.444023              | -1.19            | 0.751204              | -1.05            |
| MTSS1        | metastasis suppressor protein 1 isoform X  | 8 125902339 126085379  | 0.062714              | -1.28            | 0.633550              | -1.14            | 0.967189              | -1.01            |
| DCSTAMP      | dendritic cell-specific transmembrane prot | 8 105515541 105523181  | 0.062714              | -3.42            | 0.719819              | -1.66            | 0.069526              | -3.68            |
| SLC6A2       | sodium-dependent noradrenaline transport   | 20 43535067 43584375   | 0.062791              | 8.51             | 1.000000              | 6.12             | 0.425449              | -2.85            |
| TUBA4A       | tubulin alpha-4A chain isoform X1          | 12 108941742 108945709 | 0.062791              | 1.23             | 0.178483              | 1.29             | 0.709671              | 1.06             |
| TMEM19       | transmembrane protein 19 isoform X2        | 11 70753937 70768261   | 0.062791              | -1.29            | 0.993669              | -1.00            | 0.559082              | 1.11             |
| HADC2        | very-long-chain (3R)-3-hydroxyacyl-CoA     | 2 148558546 148652125  | 0.062891              | -1.23            | 0.786325              | 1.07             | 0.785600              | 1.04             |
| PARS2        | probable proline-tRNA ligase, mitochon     | 1 172644612 172650907  | 0.063085              | 1.21             | 0.718687              | -1.07            | 0.606800              | -1.07            |
| DDR2         | discoidin domain-containing receptor 2 is  | 1 88931259 89015135    | 0.063177              | 1.63             | 0.793333              | 1.17             | 0.298098              | 1.39             |
| LOC107126499 |                                            | 16 17240010 17246583   | 0.063229              | 4.52             | 0.360878              | -3.90            | 0.923755              | 1.10             |
| PHF20L1      | PHD finger protein 20-like protein 1 isofc | 8 134147783 134216423  | 0.063229              | -1.24            | 0.519707              | 1.15             | 0.286471              | 1.16             |
| PCED1B       | PC-esterase domain-containing protein 1E   | 11 45928003 45929301   | 0.063311              | 1.51             | 0.852661              | -1.11            | 0.948774              | 1.02             |
| LOC107128156 | flocculation protein FLO11-like            | 19 3561706 3564726     | 0.063393              | 1.44             | 0.153466              | 1.59             | 0.835467              | -1.06            |
| KCNH3        | potassium voltage-gated channel subfamil   | 11 48397195 48415664   | 0.063397              | 1.48             | 0.772467              | -1.15            | 0.252869              | -1.35            |
| YIF1B        | protein YIF1B isoform X2                   | 19 38735082 38745977   | 0.063481              | -1.31            | 0.086736              | -1.48            | 0.638074              | -1.09            |
| ALPK1        | alpha-protein kinase 1 isoform X1          | 5 111732479 111795421  | 0.063540              | 1.32             | 0.206663              | 1.38             | 0.808203              | -1.05            |
| DPY30        | protein dpy-30 homolog isoform X1          | 13 78693671 78710002   | 0.063540              | -1.17            | 0.738857              | -1.06            | 0.699781              | -1.04            |
| LOC102116058 |                                            | 1 112876752 112961692  | 0.063540              | -1.74            | 0.714484              | 1.26             | 0.529222              | -1.27            |
| PREB         | prolactin regulatory element-binding prote | 13 83743208 83746228   | 0.063577              | -1.23            | 0.793556              | -1.07            | 0.800489              | -1.04            |
| 7-Mar        | #N/A                                       | #N/A                   | 0.063704              | -1.37            | 0.485724              | 1.25             | 0.246524              | 1.26             |
| RNF216       | E3 ubiquitin-protein ligase RNF216 isofc   | 3 40281570 40440716    | 0.063710              | 1.20             | 0.576259              | -1.11            | 0.317837              | 1.13             |
| ZNF326       | DBIRD complex subunit ZNF326 isoform       | 1 137273665 137309173  | 0.063730              | -1.26            | 0.493099              | 1.18             | 0.914864              | 1.02             |
| RARB         | retinoic acid receptor beta isoform X1     | 2 21815351 22238146    | 0.063738              | 1.41             | 0.308406              | 1.41             | 0.238958              | 1.30             |
| GABRP        | gamma-aminobutyric acid receptor subun     | 6 170375874 170395871  | 0.063746              | 4.53             | 0.663957              | 2.26             | 0.799274              | -1.35            |
| LOC102146914 | hydroxycarboxylic acid receptor 2          | 11 126926293 126927384 | 0.063779              | 1.93             | 0.912520              | -1.11            | 0.222323              | 1.68             |
| C18H1orf32   | UPF0729 protein C18orf32 homolog           | 18 32337590 32338990   | 0.063923              | -1.25            | 0.432985              | 1.19             | 0.793809              | 1.04             |
| TMEM144      | transmembrane protein 144 isoform X1       | 5 157506049 157554914  | 0.063951              | -1.52            | 0.118421              | 1.76             | 0.656117              | 1.14             |
| CXCR5        | C-X-C chemokine receptor type 5 isoform    | 14 114899658 114910192 | 0.064002              | 2.25             | 1.149919              | -2.85            | 0.995415              | 1.00             |
| CNOT1        | CCR4-NOT transcription complex subuni      | 20 46568737 46663835   | 0.064002              | 1.20             | 0.557614              | -1.12            | 0.830033              | -1.03            |
| FUNDC1       | FUN14 domain-containing protein 1          | X 42805602 42830777    | 0.064002              | -1.20            | 0.518077              | -1.13            | 0.909332              | 1.02             |
| ACTN3        | alpha-actinin-3                            | 14 7932606 7948049     | 0.064022              | 1.74             | 0.909577              | -1.10            | 0.543757              | -1.25            |
| EMP3         | epithelial membrane protein 3              | 19 49141517 49145495   | 0.064139              | -1.47            | 0.660223              | -1.21            | 0.110914              | -1.45            |
| THOC3        | THO complex subunit 3 isoform X1           | 6 175681340 175689383  | 0.064279              | 1.15             | 0.028631              | -1.28            | 0.228806              | -1.11            |
| IL13RA2      | interleukin-13 receptor subunit alpha-2    | X 111927866 111941343  | 0.064287              | 2.52             | 0.750109              | 1.47             | 0.232331              | -2.05            |
| LOC102136482 | inositol hexakisphosphate and diphosphoi   | 7 91 15282             | 0.064287              | 1.76             | 0.969025              | -1.04            | 0.587579              | 1.24             |
| LOC107128189 |                                            | 19 3683092 3708133     | 0.064287              | 1.75             | 0.468599              | -1.47            | 0.560854              | 1.24             |
| MIER3        | mesoderm induction early response protei   | 6 56400704 56430614    | 0.064287              | -1.45            | 0.221292              | 1.52             | 0.284004              | 1.30             |
| ARNTL2       | aryl hydrocarbon receptor nuclear transloc | 11 28032952 28107246   | 0.064665              | -1.57            | 0.229757              | -1.65            | 0.816437              | 1.08             |
| BBS9         | protein PTHB1 isoform X3                   | 3 86942964 87435079    | 0.064674              | 1.23             | 0.453986              | -1.17            | 0.703160              | -1.06            |
| CETN3        | centrin-3 isoform X1                       | 6 88793334 88808659    | 0.064715              | -1.19            | 0.456887              | 1.14             | 0.258984              | 1.14             |
| SPDL1        | protein Spindly isoform X2                 | 6 169189668 169205452  | 0.064715              | -1.54            | 0.862392              | -1.11            | 0.301013              | 1.33             |
| FRMPD4       | FERM and PDZ domain-containing prote       | X 9597376 10475182     | 0.064728              | 3.16             | 0.204363              | 3.76             | 0.891341              | 1.13             |
| ZHX2         | zinc fingers and homeoboxes protein 2      | 8 124309662 124312175  | 0.064728              | 1.27             | 0.344883              | 1.24             | 0.645209              | 1.08             |
| LOC102141085 |                                            | 15 46321118 46322127   | 0.064728              | -1.25            | 0.184778              | 1.32             | 0.553793              | -1.10            |
| LPAR6        | lysophosphatidic acid receptor 6           | 17 27581841 27582875   | 0.064728              | -1.55            | 0.734214              | 1.20             | 0.373545              | 1.29             |
| GPR146       | probable G-protein coupled receptor 146    | 3 35934401 35935402    | 0.064771              | 1.68             | 0.193888              | 1.87             | 0.930424              | 1.04             |
| GHV          | growth hormone variant precursor           | 16 61170625 61172073   | 0.064771              | -5.40            | 0.978777              | 1.07             | 0.911742              | 1.12             |
| HTR2B        | 5-hydroxytryptamine receptor 2B            | 12 120919639 120936460 | 0.064889              | 2.73             | 0.179105              | 2.94             | 0.762195              | 1.22             |
| IL5RA        | interleukin-5 receptor subunit alpha isofc | 2 133955957 133991830  | 0.064939              | 5.10             | 0.729014              | 1.88             | 0.995629              | 1.01             |
| PGRMC1       | membrane-associated progesterone recept    | X 115922356 115929227  | 0.064939              | -1.21            | 0.093809              | 1.32             | 0.253916              | 1.15             |
| VMA21        | vacuolar ATPase assembly integral memb     | X 148303461 148311475  | 0.064939              | -1.28            | 0.213458              | 1.33             | 0.437413              | 1.14             |
| FAM3C        | protein FAM3C                              | 3 154125641 154157814  | 0.064939              | -1.52            | 0.204714              | 1.63             | 0.727153              | 1.11             |
| RM12         | recQ-mediated genome instability protei    | 20 11618314 11624024   | 0.064939              | -1.71            | 0.856998              | -1.14            | 0.947684              | -1.03            |
| S100A11      | protein S100-A11                           | 1 99879861 99884121    | 0.065093              | -1.35            | 0.478066              | -1.24            | 0.511290              | -1.14            |



| Gene symbol  | Gene name                                                                   | chr_start_end          | Day3 adjusted P-value | Day3 fold change | Day5 adjusted P-value | Day5 fold change | Day7 adjusted P-value | Day7 fold change |
|--------------|-----------------------------------------------------------------------------|------------------------|-----------------------|------------------|-----------------------|------------------|-----------------------|------------------|
| ARHGEF10L    | rho guanine nucleotide exchange factor 10                                   | 1 210793598 210911435  | 0.065109              | -1.49            | 0.312778              | -1.47            | 0.857760              | 1.06             |
| SERPINA5     | plasma serine protease inhibitor isoform X1                                 | 7 159627247 159637595  | 0.065214              | 2.11             | 0.506301              | 1.80             | 0.311679              | -1.70            |
| IFT46        | intraflagellar transport protein 46 homolog                                 | 14 114547707 114558358 | 0.065214              | 1.15             | 0.585877              | -1.09            | 0.237266              | -1.11            |
| LOC102140442 | lymphocyte antigen 6H                                                       | 8 144694153 144695710  | 0.065255              | 7.55             | 1.000000              | 2.83             | 0.358852              | 2.72             |
| LOC107130096 |                                                                             | 6 151941266 152037745  | 0.065255              | 3.49             | 0.780365              | 1.34             | 0.604891              | 1.48             |
| LOC102124047 | putative V-set and immunoglobulin domain protein myo-inositol cotransporter | 0 537644 538401        | 0.065255              | 2.40             | 0.760043              | 1.37             | 0.416953              | 1.56             |
| ITGA8        | integrin alpha-8 isoform X2                                                 | 9 16053886 16249148    | 0.065255              | 1.58             | 0.360379              | 1.50             | 0.594695              | 1.18             |
| SLC35G1      | solute carrier family 35 member G1 isoform X1                               | 9 92414070 92421850    | 0.065255              | -1.31            | 0.395208              | 1.26             | 0.152703              | 1.28             |
| ACTR13       | actin-related protein T3                                                    | 2 73965820 73968332    | 0.065255              | -1.33            | 0.588878              | 1.19             | 0.930592              | -1.02            |
| LOC101865988 |                                                                             | 10 24849461 24868945   | 0.065425              | 1.60             | 0.389595              | 1.49             | 0.743129              | 1.12             |
| LOC102130657 | torsin-1A-interacting protein 2, isoform 1                                  | 1 37818456 37818851    | 0.065584              | -1.15            | 0.085276              | 1.24             | 0.712533              | -1.04            |
| SLC2A13      | transmembrane protein myo-inositol cotransporter                            | 11 38167634 38535252   | 0.065584              | -1.51            | 0.444023              | 1.38             | 0.585309              | 1.67             |
| SPATA2L      | spermatogenesis-associated protein 2-like                                   | 20 78140423 78144304   | 0.065709              | -1.46            | 0.767911              | -1.15            | 0.156920              | -1.40            |
| PAG1         | phosphoprotein associated with glycosylated                                 | 8 82151599 82168441    | 0.065713              | -1.36            | 0.542118              | 1.22             | 0.114187              | 1.34             |
| TRIAP1       | TP53-regulated inhibitor of apoptosis 1                                     | 11 124349673 124351139 | 0.065745              | -1.19            | 0.847444              | 1.04             | 0.399772              | 1.05             |
| SLC22A16     | solute carrier family 22 member 16 isoform X1                               | 4 14285262 14337878    | 0.065796              | 3.06             | 0.879354              | 1.31             | 0.957048              | 1.06             |
| CCL21        | chemokine (C-C motif) ligand 21 precursor                                   | 15 44418984 44419649   | 0.065950              | 1.85             | 0.954110              | 1.06             | 0.671709              | 1.20             |
| TNRC6C       | trinucleotide repeat-containing gene 6C protein                             | 16 75383994 75474984   | 0.065950              | 1.20             | 0.422516              | -1.16            | 0.465190              | 1.10             |
| LSM8         | LSM8 homolog, U6 small nuclear RNA associated                               | 3 150694434 150702159  | 0.065950              | -1.21            | 0.882966              | -1.04            | 0.962148              | 1.01             |
| ABHD13       | alpha/beta hydrolase domain-containing protein 13                           | 17 90727110 90728123   | 0.066081              | -1.42            | 0.591341              | 1.23             | 0.305326              | 1.26             |
| POLE4        | DNA polymerase epsilon subunit 4 isoform X1                                 | 13 34870836 34931103   | 0.066384              | -1.30            | 0.665933              | -1.14            | 0.280600              | -1.20            |
| METTL18      | histidine protein methyltransferase 1 homolog                               | 1 27744437 27751844    | 0.066411              | -1.23            | 0.781141              | -1.07            | 0.372870              | 1.13             |
| ACP2         | lysosomal acid phosphatase                                                  | 14 20308041 20316974   | 0.066673              | -1.39            | 0.153661              | -1.52            | 0.598942              | -1.13            |
| ZNF655       | zinc finger protein 655 isoform X1                                          | 3 43829728 43843572    | 0.066677              | -1.23            | 0.409489              | 1.18             | 0.775502              | -1.04            |
| FAM117A      | protein FAM117A isoform X2                                                  | 16 35097760 35154927   | 0.066718              | 1.30             | 0.038089              | -1.56            | 0.733446              | -1.07            |
| VPS9D1       | VPS9 domain-containing protein 1                                            | 20 78149624 78159527   | 0.066718              | -1.50            | 0.676345              | -1.22            | 0.765553              | -1.09            |
| LOC102141029 | 60S ribosomal protein L21                                                   | 4 113266613 113267095  | 0.066733              | 2.23             | 0.900485              | 1.15             | 0.603274              | -1.33            |
| DCAF10       | DDb1- and CUL4-associated factor 10 isoform X1                              | 15 41114596 411179255  | 0.066733              | -1.25            | 0.437042              | 1.19             | 0.506499              | 1.11             |
| ZMPSTE24     | CAAX prenyl protease 1 homolog isoform X1                                   | 1 187412125 187466127  | 0.066733              | -1.47            | 0.329312              | 1.44             | 0.461425              | 1.21             |
| PRSS16       | thymus-specific serine protease isoform X1                                  | 4 143578537 143585502  | 0.067026              | -1.32            | 0.854827              | -1.07            | 0.312343              | 1.20             |
| BCAS4        | breast carcinoma-amplified sequence 4 isoform X1                            | 10 82624832 82714299   | 0.067148              | 1.53             | 0.689785              | -1.21            | 0.456574              | -1.23            |
| NUFIP2       | nuclear fragile X mental retardation-interacting protein unc-50 homolog     | 16 25542057 25574396   | 0.067148              | -1.42            | 0.409136              | 1.33             | 0.699728              | 1.10             |
| UNC50        | protein unc-50 homolog                                                      | 13 2829267 2843778     | 0.067150              | -1.17            | 0.965070              | -1.01            | 0.994881              | -1.00            |
| UBA6         | ubiquitin-like modifier-activating enzyme                                   | 5 66615615 66687920    | 0.067150              | -1.36            | 0.215134              | 1.42             | 0.574625              | 1.13             |
| LOC102129087 | Ig kappa chain V-III region VG-like isoform X1                              | 13 19129648 19130314   | 0.067171              | 2.29             | 0.819669              | 1.27             | 0.074775              | 2.40             |
| TCPI1L2      | T-complex protein 11-like protein 2                                         | 11 110024966 110060401 | 0.067171              | 1.42             | 0.613838              | -1.22            | 0.978587              | -1.01            |
| ND4          | NADH dehydrogenase subunit 4                                                | MT_10759_12136         | 0.067171              | -1.44            | 0.690684              | -1.18            | 0.700864              | -1.11            |
| ZNF587       | zinc finger protein 587 isoform X2                                          | 19 58458963 58494942   | 0.067226              | 1.20             | 0.572388              | -1.12            | 0.874957              | 1.02             |
| TATDN2       | putative deoxyribonuclease TATDN2                                           | 2 141220820 141268509  | 0.067226              | 1.13             | 0.411047              | -1.10            | 0.442221              | -1.06            |
| TIPRL        | TIP41-like protein                                                          | 1 26141402 26163085    | 0.067228              | -1.28            | 0.701685              | 1.12             | 0.323909              | 1.18             |
| PLEKHB2      | pleckstrin homology domain-containing protein 2                             | 12 25951 57060         | 0.067228              | -1.47            | 0.926131              | -1.05            | 0.735726              | -1.10            |
| C20H16orf74  | uncharacterized protein C16orf74 homolog                                    | 20 74063093 74092141   | 0.067365              | 1.41             | 0.972464              | 1.02             | 0.339611              | -1.22            |
| C4H6orf106   | uncharacterized protein C6orf106 homolog                                    | 4 136088280 136205104  | 0.067365              | 1.17             | 0.411140              | -1.14            | 0.496492              | -1.07            |
| TLCD1        | calfacitilin isoform X2                                                     | 16 24973659 24976029   | 0.067365              | -1.42            | 0.057972              | -1.71            | 0.195112              | -1.32            |
| PLCE1        | 1-phosphatidylinositol 4,5-bisphosphate phosphatase                         | 9 92546192 92870136    | 0.067523              | 1.38             | 0.491360              | 1.26             | 0.620711              | -1.12            |
| ZNF629       | zinc finger protein 629                                                     | 20 29414453 29417226   | 0.067568              | 1.40             | 0.882966              | 1.07             | 0.415088              | 1.20             |
| TMIE         | transmembrane inner ear expressed protein                                   | 2 101722921 101730748  | 0.067568              | -1.67            | 0.677945              | -1.29            | 0.90240               | -1.72            |
| MMP19        | matrix metalloproteinase-19                                                 | 11 54746866 54752646   | 0.067568              | -1.79            | 0.978777              | -1.03            | 0.000456              | -2.85            |
| TXN          | thioredoxin                                                                 | 15 27430317 27442887   | 0.067597              | -1.34            | 0.283043              | -1.35            | 0.308449              | -1.22            |
| PRPF38B      | pre-mRNA-splicing factor 38B                                                | 1 118106930 118114412  | 0.067678              | -1.18            | 0.337792              | 1.17             | 0.752698              | 1.04             |
| LOC102136964 | leukocyte-associated immunoglobulin-like protein 1                          | 19 55270605 55280197   | 0.067678              | -1.54            | 0.212690              | -1.64            | 0.452213              | -1.97            |
| CMC2         | COX assembly mitochondrial protein 2 homolog                                | 20 69227309 69250050   | 0.067792              | -1.32            | 0.973217              | -1.02            | 0.459784              | -1.15            |
| TMEM231      | transmembrane protein 231 isoform X1                                        | 20 63702215 63725381   | 0.067821              | 1.31             | 0.882403              | -1.06            | 0.939361              | 1.02             |
| UCHL3        | ubiquitin carboxyl-terminal hydrolase isoform X1                            | 17 58011197 58087907   | 0.067821              | -1.55            | 0.516100              | 1.35             | 0.891968              | 1.05             |
| CCR10        | C-C chemokine receptor type 10                                              | 16 54435156 54437439   | 0.067874              | 1.95             | 0.549351              | -1.41            | 0.570213              | 1.22             |
| MYEF2        | myelin expression factor 2 isoform X2                                       | 7 25087592 25122813    | 0.067874              | -1.28            | 0.094015              | 1.44             | 0.561082              | 1.11             |
| CABP7        | calcium-binding protein 7                                                   | 10 21747259 21756791   | 0.067888              | 5.38             | 1.000000              | -1.06            | 0.221366              | 3.22             |
| UBE2Q2       | ubiquitin-conjugating enzyme E2 Q2 isoform X1                               | 7 54104983 54162969    | 0.067889              | -1.35            | 0.167735              | 1.45             | 0.219277              | 1.27             |
| AGL          | glycogen debranching enzyme                                                 | 1 126933967 127003451  | 0.068014              | -1.35            | 0.453500              | 1.26             | 0.217201              | 1.27             |
| KMT2D        | histone-lysine N-methyltransferase 2D                                       | 11 47852563 47886885   | 0.068158              | 1.15             | 0.843736              | -1.04            | 0.722817              | 1.04             |
| WDR20        | WD repeat-containing protein 20 isoform X1                                  | 7 167365393 167449909  | 0.068158              | -1.13            | 0.163281              | 1.18             | 0.710680              | -1.04            |
| DPPA2        | developmental pluripotency-associated protein 2                             | 2 162869986 162882465  | 0.068535              | 2.29             | 0.179105              | -2.68            | 0.561590              | -1.38            |
| CARNMT1      | carnosine N-methyltransferase                                               | 15 85787382 85829946   | 0.068578              | -1.63            | 0.448471              | 1.46             | 0.511042              | 1.25             |
| LY6G5C       | lymphocyte antigen 6 complex locus protein 5C                               | 4 139191579 139194990  | 0.068585              | 4.89             | 0.938898              | -1.15            | 0.305326              | -2.34            |
| SPATA33      | spermatogenesis-associated protein 33 isoform X1                            | 20 78101936 78111581   | 0.068616              | -1.26            | 0.799947              | 1.08             | 0.268000              | -1.19            |
| LAIR2        | leukocyte-associated immunoglobulin-like protein 2                          | 19 55426607 55434296   | 0.068620              | 1.71             | 0.001252              | -3.58            | 0.821762              | 1.11             |
| LOC102119366 | C-C motif chemokine 4-like                                                  | 16 55926 57354         | 0.068814              | -1.61            | 0.900293              | 1.09             | 0.750140              | -1.12            |
| PHF1         | PHD finger protein 1 isoform X2                                             | 4 137351142 137355302  | 0.068883              | 1.29             | 0.753713              | 1.11             | 0.293571              | -1.20            |
| LOC102147046 | adhesion G protein-coupled receptor E4-like                                 | 19 9692 28640          | 0.068945              | 5.01             | 0.621747              | -2.28            | 0.580758              | -1.82            |
| TTC29        | tetratricopeptide repeat protein 29                                         | 5 145793088 146066234  | 0.068945              | 3.95             | 0.712945              | 2.18             | 0.503377              | -2.05            |
| INTS8        | integrator complex subunit 8 isoform X1                                     | 8 95965279 96021879    | 0.068945              | -1.15            | 0.677538              | -1.07            | 0.421583              | 1.08             |
| LOC102143570 |                                                                             | 7 108307457 108411684  | 0.068945              | -2.14            | 0.913887              | 1.12             | 0.647374              | -1.29            |
| ANKRD31      | putative ankyrin repeat domain-containing protein 31                        | 6 73313398 73472678    | 0.068961              | 2.97             | 0.428707              | 2.51             | 0.956819              | -1.05            |
| KATNB1       | katanin p80 WD40 repeat-containing subunit 1                                | 20 45768902 45788371   | 0.068961              | 1.22             | 0.035637              | -1.43            | 0.499589              | -1.10            |
| DNAJB4       | dnaJ homolog subfamily B member 4 isoform X1                                | 1 149206564 149218493  | 0.068990              | -1.40            | 0.018586              | 1.89             | 0.899708              | 1.04             |
| ARVCF        | armadillo repeat protein deleted in velo-cardio-facial syndrome             | 10 31464386 31484475   | 0.069074              | 1.51             | 0.473638              | -1.35            | 0.210026              | -1.39            |
| PKNOX2       | homeobox protein PKNOX2 isoform X1                                          | 14 121171753 121253035 | 0.069100              | 1.48             | 0.425291              | 1.38             | 0.666140              | 1.13             |
| C4H6orf62    | uncharacterized protein C6orf62 homolog                                     | 4 145857252 145871376  | 0.069137              | -1.31            | 0.470216              | 1.22             | 0.459232              | 1.15             |
| ZNF195       | zinc finger protein 195 isoform X5                                          | 14 3242761 3267451     | 0.069302              | -1.34            | 0.989138              | -1.01            | 0.696000              | 1.09             |
| LOC102135944 | histone H3.3-like                                                           | X 77815355 77815765    | 0.069302              | -1.34            | 0.239668              | 1.38             | 0.981456              | 1.01             |
| LOC102132849 | uncharacterized protein LOC102132849                                        | 16 62081868 62086524   | 0.069318              | -1.85            | 0.517864              | -1.56            | 0.130227              | -1.79            |
| LOC107130071 | protein PRRC2A-like                                                         | 6 133581270 133582087  | 0.069365              | -1.65            | 0.912571              | 1.09             | 0.530836              | -1.28            |
| CACHD1       | VWFA and cache domain-containing protein 1                                  | 1 162703393 162927946  | 0.069433              | 1.39             | 0.682044              | 1.17             | 0.337712              | -1.23            |
| KLHDC3       | kelch domain-containing protein 3                                           | 4 127554605 127558181  | 0.069433              | 1.17             | 0.321766              | -1.17            | 0.557807              | -1.07            |
| KCNMB2       | calcium-activated potassium channel subunit 2                               | 2 83277726 83313607    | 0.069587              | 2.10             | 0.957725              | -1.07            | 0.478838              | 1.45             |
| IPMK         | inositol polyphosphate multikinase isoform X1                               | 9 77885659 77965809    | 0.069603              | -1.56            | 0.452821              | 1.41             | 0.436636              | 1.26             |
| MUC5B        | mucin-5B                                                                    | 14 1068191 1106998     | 0.069660              | 7.62             | 0.951046              | 1.24             | 0.964097              | 1.08             |

| Gene symbol  | Gene name                                                   | chr_start_end          | Day3 adjusted P-value | Day3 fold change | Day5 adjusted P-value | Day5 fold change | Day7 adjusted P-value | Day7 fold change |
|--------------|-------------------------------------------------------------|------------------------|-----------------------|------------------|-----------------------|------------------|-----------------------|------------------|
| CCDC78       | coiled-coil domain-containing protein 78                    | 20 748804 752297       | 0.069660              | 2.15             | 0.471336              | -1.83            | 0.250377              | -1.80            |
| LOC102131292 |                                                             | 1 59383469 59392801    | 0.069662              | 6.56             | 1.000000              | 2.19             | 0.643441              | 1.60             |
| EXOC3L2      | exocyst complex component 3-like protein                    | 19 45980240 45999625   | 0.069664              | 1.64             | 0.359135              | 1.58             | 0.738778              | -1.13            |
| TRIM13       | uncharacterized protein LOC101925265                        | 4 30009204 30009263    | 0.069664              | -1.30            | 0.994601              | 1.00             | 0.672584              | -1.08            |
| NAAA         | N-acylethanolamine-hydrolyzing acid amidase                 | 5 58534497 58561226    | 0.069664              | -1.37            | 0.556086              | -1.22            | 0.017165              | 1.54             |
| SKIV2L       | helicase SKIV2L isoform X1                                  | 4 138884061 138894522  | 0.069703              | 1.25             | 0.355520              | -1.22            | 0.179410              | -1.21            |
| TMEM126B     | complex I assembly factor TMEM126B, isoform 1               | 14 81197873 81204395   | 0.069714              | -1.36            | 0.730426              | 1.14             | 0.331890              | 1.22             |
| LOC102131846 |                                                             | 3 330103 331237        | 0.069802              | 2.98             | 0.448294              | -2.48            | 0.993613              | 1.01             |
| MORN5        | MORN repeat-containing protein 5 isoform 1                  | 15 15061847 15112699   | 0.069962              | 5.79             | 0.869401              | -1.61            | 0.376131              | -2.97            |
| PRRG3        | transmembrane gamma-carboxyglutamate decarboxylase 3        | X 148646935 148649153  | 0.069962              | 2.02             | 0.734165              | 1.33             | 0.761156              | 1.17             |
| SETDB1       | histone-lysine N-methyltransferase SETDB1                   | 1 101066093 101109152  | 0.069962              | 1.12             | 0.080050              | -1.19            | 0.576608              | -1.05            |
| ZCRB1        | uncharacterized protein LOC101926689                        | 11 40860187 40870834   | 0.069962              | -1.19            | 0.655489              | 1.09             | 0.781309              | -1.04            |
| BLVRA        | biliverdin reductase A isoform X2                           | 3 76625937 76657512    | 0.069962              | -1.23            | 0.566800              | -1.14            | 0.066471              | -1.26            |
| PGP          | phosphoglycolate phosphatase                                | 20 2288679 2289731     | 0.070057              | -1.31            | 0.905781              | -1.05            | 0.174294              | -1.26            |
| TBC1D17      | TBC1 domain family member 17                                | 19 50760334 50771065   | 0.070107              | 1.35             | 0.612471              | -1.19            | 0.380188              | -1.19            |
| LOC107127139 |                                                             | 13 67305292 67314149   | 0.070198              | -1.64            | 0.250488              | -1.71            | 0.502621              | 1.26             |
| TMEM150C     | transmembrane protein 150C isoform X1                       | 5 51883135 51968878    | 0.070263              | 1.52             | 0.965407              | 1.03             | 0.583275              | 1.18             |
| CNTNAP4      | contactin-associated protein-like 4 isoform 1               | 20 64422121 64707963   | 0.070304              | 4.89             | 0.765297              | -1.51            | 0.070917              | 3.35             |
| TTC17        | tetratricopeptide repeat protein 17 isoform 1               | 14 24080529 24218855   | 0.070304              | 1.13             | 0.662700              | 1.06             | 0.255895              | -1.10            |
| NFE2L1       | nuclear factor erythroid 2-related factor 1                 | 16 33383314 33391838   | 0.070329              | 1.19             | 0.908222              | 1.03             | 0.968056              | 1.01             |
| FUBP1        | far upstream element-binding protein 1 isoform 1            | 1 149243864 149278670  | 0.070329              | -1.19            | 0.535548              | 1.12             | 0.292924              | 1.13             |
| PPP2CA       | uncharacterized protein LOC101864925                        | 6 133216633 133244781  | 0.070389              | -1.32            | 0.585544              | 1.18             | 0.764007              | 1.06             |
| KIAA1324L    | UPF0577 protein KIAA1324-like homolog 1                     | 3 125004500 125181743  | 0.070482              | 1.31             | 0.006686              | -1.76            | 0.278634              | -1.21            |
| FOXP4        | forkhead box protein P4 isoform X4                          | 4 129070912 129103881  | 0.070613              | 1.24             | 0.000543              | -1.71            | 0.752698              | -1.05            |
| THAP6        | THAP domain-containing protein 6                            | 5 58954005 58965764    | 0.070642              | -1.24            | 0.344883              | 1.23             | 0.416031              | 1.13             |
| NLRP12       | NACHT, LRR and PYD domains-containing protein 12            | 19 54663837 54677357   | 0.070702              | 2.06             | 0.954837              | 1.07             | 0.311817              | 1.65             |
| ZNF3         | zinc finger protein 3 isoform X2                            | 3 44425402 44431937    | 0.070769              | 1.18             | 0.864904              | -1.04            | 0.978822              | 1.00             |
| MTIF2        | translation initiation factor IF-2, mitochondrial           | 13 54762138 54789952   | 0.070769              | -1.25            | 0.898834              | 1.04             | 0.388568              | 1.14             |
| AGA          | N(4)-(beta-N-acetylglucosaminy)-L-asparagine                | 5 176748947 176779623  | 0.070782              | -1.30            | 0.244245              | 1.33             | 0.070217              | -1.33            |
| DAGLB        | sn1-specific diacylglycerol lipase beta                     | 3 41722410 41751783    | 0.070896              | -1.23            | 0.599498              | -1.13            | 0.000010              | -1.58            |
| SYNJ1        | synaptotagmin-1 isoform X1                                  | 3 14052214 14126803    | 0.070896              | -1.36            | 0.204263              | 1.44             | 0.360598              | 1.08             |
| LOC107130367 | T-cell receptor alpha chain V region PY14                   | 7 85556570 85557066    | 0.070902              | 4.51             | 0.571344              | -2.35            | 0.814081              | -1.27            |
| COG1         | conserved oligomeric Golgi complex subunit 1                | 16 70388548 70403673   | 0.070902              | 1.16             | 0.971551              | -1.01            | 0.901636              | -1.02            |
| APH1B        | uncharacterized protein LOC101925481                        | 7 40639715 40665000    | 0.070906              | 1.20             | 0.479791              | -1.15            | 0.550083              | 1.08             |
| MTRF2        | mitochondrial fission regulator 2 isoform 1                 | 4 40546362 40565052    | 0.070921              | -1.33            | 0.523602              | -1.22            | 0.994007              | -1.00            |
| NXPE3        | NXPE family member 3 isoform X2                             | 2 170346462 170380666  | 0.070955              | -1.19            | 0.531021              | 1.13             | 0.001801              | 1.34             |
| RYR2         | ryanodine receptor 2 isoform X10                            | 1 11653132 12442936    | 0.070990              | -1.72            | 0.244296              | 1.81             | 0.614334              | 1.21             |
| LOC107130694 |                                                             | 8 129196741 129253357  | 0.071017              | -1.31            | 0.946170              | 1.03             | 0.841757              | 1.04             |
| KBTBD3       | kelch repeat and BTB domain-containing protein 3            | 14 102088845 102095110 | 0.071017              | -1.37            | 0.503861              | 1.25             | 0.427611              | 1.19             |
| ARRGHF17     | rho guanine nucleotide exchange factor 17                   | 14 68535974 68595414   | 0.071063              | 1.45             | 0.785607              | -1.14            | 0.769279              | -1.09            |
| ERICH3       | glutamate-rich protein 3 isoform X1                         | 1 152593319 152702872  | 0.071318              | 2.98             | 0.988339              | 1.03             | 0.862663              | -1.13            |
| AGTR2        | type-2 angiotensin II receptor                              | X 112944555 112945646  | 0.071319              | -4.09            | 0.215962              | 7.92             | 0.231324              | -2.85            |
| AKAP14       | A-kinase anchor protein 14 isoform X1                       | X 116659172 116676074  | 0.071462              | 3.30             | 0.799141              | 1.59             | 0.678970              | -1.46            |
| RNASE10      | inactive ribonuclease-like protein 10 isoform 1             | 7 84040928 84045404    | 0.071478              | -2.10            | 0.203926              | 2.44             | 0.801507              | 1.15             |
| CASP8        | caspase-8 isoform X1                                        | 12 90637354 90662924   | 0.071543              | 1.23             | 0.918595              | -1.03            | 0.150943              | 1.21             |
| APOBEC4      | putative C->U-editing enzyme APOBEC4                        | 1 41608653 41609744    | 0.071554              | 6.46             | 1.000000              | -1.06            | 0.548812              | -2.68            |
| P4HA1        | prolyl 4-hydroxylase subunit alpha-1 isoform 1              | 9 62480520 62552044    | 0.071554              | -1.74            | 0.830632              | 1.17             | 0.354330              | 1.41             |
| GPAT2        | glycerol-3-phosphate acyltransferase 2, mitochondrial       | 13 815335 825522       | 0.071554              | -6.71            | 1.000000              | 1.83             | 1.000000              | 9.00             |
| LOC107130515 | Ig heavy chain V-I region V35-like                          | 7 171622686 171623133  | 0.071578              | 3.47             | 0.670386              | 1.85             | 0.330730              | 2.13             |
| EDA          | ectodysplasin-A isoform X1                                  | X 66624026 67067249    | 0.071578              | 1.92             | 0.203926              | 2.18             | 0.980289              | -1.01            |
| UBQLN2       | ubiquilin-2                                                 | X 55810440 55812314    | 0.071591              | -1.31            | 0.639095              | 1.16             | 0.261822              | 1.22             |
| ERC1         | ELKS/Rab6-interacting/CAST family member 1                  | 11 1058523 1579689     | 0.071605              | 1.19             | 0.982409              | -1.01            | 0.602675              | 1.07             |
| LOC102129564 | zinc finger protein DPF3-like                               | 20 52384191 52424503   | 0.071686              | 3.74             | 0.991377              | 1.02             | 0.643280              | 1.41             |
| LOC102130415 | Ig-like V-type domain-containing protein 1                  | 16 56713804 56715048   | 0.071693              | 2.57             | 0.897958              | 1.22             | 0.439091              | -1.72            |
| SLC25A18     | mitochondrial glutamate carrier 2 isoform 1                 | 10 33154203 33183779   | 0.071738              | 2.54             | 0.566253              | -1.81            | 0.001112              | -6.18            |
| ORM1         | alpha-1-acid glycoprotein 1 isoform X2                      | 15 23244894 23248149   | 0.071812              | 1.79             | 0.003216              | 3.72             | 0.920451              | 1.05             |
| NFYC         | nuclear transcription factor Y subunit gamma                | 1 186948738 187011745  | 0.071812              | 1.22             | 0.359973              | -1.20            | 0.568175              | -1.08            |
| PRRC2A       | protein PRRC2A                                              | 4 139236183 139250942  | 0.071856              | 1.22             | 0.617702              | -1.12            | 0.390516              | 1.12             |
| SF3A2        | splicing factor 3A subunit 2                                | 19 2113564 2119561     | 0.071856              | 1.20             | 0.614158              | -1.11            | 0.760943              | 1.04             |
| TPRKB        | EKC/KEOPS complex subunit TPRKB isoform 1                   | 13 36188237 36193231   | 0.071856              | -1.48            | 0.980965              | -1.02            | 0.775659              | -1.09            |
| LOC107129754 | uncharacterized protein LOC107129754                        | 5 104581130 104585951  | 0.071856              | -5.98            | 1.000000              | 13.61            | 0.561912              | 1.90             |
| FAM65C       | protein FAM65C isoform X2                                   | 10 82403139 82514200   | 0.071914              | 1.80             | 0.943369              | 1.07             | 0.448740              | -1.35            |
| MPZ          | myelin protein P0                                           | 1 90338971 90342987    | 0.071929              | 1.49             | 0.005854              | -2.45            | 0.852944              | 1.06             |
| KIAA1468     | lisH domain and HEAT repeat-containing protein 1            | 18 18043933 18162735   | 0.072019              | -1.20            | 0.945926              | 1.02             | 0.867281              | -1.02            |
| LOC102132251 |                                                             | 3 63589001 63600266    | 0.072019              | -2.29            | 0.442189              | 2.01             | 0.144851              | -2.38            |
| FOLH1B       | putative N-acetylated-alpha-linked acidic dipeptidase 1     | 14 85123813 85189233   | 0.072023              | 1.46             | 0.203926              | 1.57             | 0.914864              | -1.03            |
| C3H21orf58   | LOW QUALITY PROTEIN: uncharacterized protein C3H21orf58     | 3 466680 488381        | 0.072023              | 1.40             | 0.694214              | -1.18            | 0.315566              | -1.27            |
| C15H9orf135  | uncharacterized protein C9orf135 homolog 1                  | 15 80567438 80652338   | 0.072101              | 3.90             | 0.944129              | -1.18            | 0.320813              | -2.76            |
| LOC102121796 | dimethylalanine monoxygenase [N-oxide reductase]            | 1 29049284 29071021    | 0.072220              | 2.99             | 0.980588              | 1.04             | 0.837933              | 1.19             |
| SLC04C1      | solute carrier organic anion transporter family 4 member C1 | 6 100773148 100844052  | 0.072407              | 1.82             | 0.005911              | -3.37            | 0.895401              | 1.06             |
| C1H1orf87    | uncharacterized protein C1orf87 homolog 1                   | 1 167300962 167382680  | 0.072407              | 1.52             | 0.657551              | -1.25            | 0.859414              | -1.06            |
| ECE1         | endothelin-converting enzyme 1 isoform 1                    | 1 207087835 207162120  | 0.072407              | 1.34             | 0.302530              | 1.35             | 0.611735              | -1.11            |
| NOP10        | H/ACA ribonucleoprotein complex subunit 10                  | 7 11003910 11005019    | 0.072407              | -1.29            | 0.895774              | -1.05            | 0.111410              | -1.29            |
| TMEM33       | transmembrane protein 33 isoform X1                         | 5 41686069 41705623    | 0.072407              | -1.45            | 0.510073              | 1.30             | 0.187678              | 1.38             |
| AGR3         | anterior gradient protein 3                                 | 3 103861685 103880534  | 0.072466              | -1.31            | 0.064239              | -1.53            | 0.000007              | -1.81            |
| LOC102126084 | Ig heavy chain Mem5-like                                    | 10 28425403 29178488   | 0.072568              | 2.01             | 0.733704              | 1.34             | 0.990175              | -1.01            |
| ATP1B2       | sodium/potassium-transporting ATPase subunit beta 2         | 16 7725737 7730136     | 0.072568              | 1.90             | 0.738009              | -1.31            | 0.454013              | 1.40             |
| LOC102144583 | histone H2A type 2-C                                        | 1 102223890 102224279  | 0.072578              | -1.42            | 0.580925              | -1.24            | 0.791208              | -1.07            |
| RNPEP        | aminopeptidase B isoform X3                                 | 1 60359630 60388918    | 0.072613              | 1.33             | 0.260443              | -1.35            | 0.857760              | -1.04            |
| LOC102140116 | uncharacterized protein C4orf3 homolog 1                    | X 39505964 39506185    | 0.072856              | -2.24            | 0.966983              | 1.06             | 0.991390              | 1.01             |
| CCNE2        | G1/S-specific cyclin-E2 isoform X2                          | 8 96023275 96036096    | 0.072915              | -1.86            | 0.764522              | 1.26             | 0.424666              | 1.40             |
| TFRC         | transferrin receptor protein 1                              | 2 283671 309249        | 0.072949              | -2.12            | 0.960153              | -1.06            | 0.451225              | 1.47             |
| LOC102138120 |                                                             | 11 53039503 53048041   | 0.072975              | 2.79             | 0.919838              | -1.16            | 0.376672              | 1.73             |
| LOC102144455 |                                                             | 6 89699688 89708977    | 0.073055              | -3.04            | 0.496539              | -2.27            | 0.285153              | -2.20            |
| LOC101866502 | radial spoke head 10 homolog B2 isoform 1                   | 3 1566 19683           | 0.073209              | 2.11             | 0.990841              | -1.02            | 0.980289              | -1.02            |
| CCR6         | C-C chemokine receptor type 6                               | 4 3589024 3590259      | 0.073209              | 1.60             | 0.153661              | -1.83            | 0.965046              | 1.02             |
| STAT5B       | signal transducer and activator of transcription 5B         | 16 53912807 53943534   | 0.073209              | 1.45             | 0.850130              | 1.10             | 0.238251              | 1.33             |

| Gene symbol  | Gene name                                     | chr_start_end          | Day3 adjusted P-value | Day3 fold change | Day5 adjusted P-value | Day5 fold change | Day7 adjusted P-value | Day7 fold change |
|--------------|-----------------------------------------------|------------------------|-----------------------|------------------|-----------------------|------------------|-----------------------|------------------|
| PHLDB3       | pleckstrin homology-like domain family F      | 0 45303 64526          | 0.073209              | 1.38             | 0.183859              | -1.45            | 0.472573              | -1.17            |
| MCTS1        | malignant T-cell-amplified sequence 1 iso     | X 117280693 117288766  | 0.073209              | -1.32            | 0.959075              | -1.02            | 0.750778              | 1.07             |
| LOC102139776 | Ig kappa chain V-II region TEW-like           | 13 17959966 17960949   | 0.073226              | 2.62             | 0.865271              | 1.25             | 0.563394              | 1.44             |
| LOC102143945 | LOW QUALITY PROTEIN: glycine N-as             | 14 14897417 14924009   | 0.073315              | -1.83            | 0.150931              | -2.16            | 0.848046              | 1.09             |
| DLAT         | dihydropolyllysine-residue acetyltransfer     | 14 108018630 108057898 | 0.073385              | -1.22            | 0.369296              | 1.20             | 0.476280              | 1.10             |
| LOC102147320 |                                               | 6 123391406 123455617  | 0.073433              | 2.71             | 0.618272              | -1.64            | 0.423504              | -2.08            |
| PHLPP1       | PH domain leucine-rich repeat-containing      | 18 17363242 17627392   | 0.073433              | 1.23             | 0.096218              | 1.36             | 0.614334              | 1.08             |
| PHF8         | histone lysine demethylase PHF8 isoform       | X 53019239 53128502    | 0.073433              | 1.16             | 0.889727              | -1.03            | 0.284004              | 1.11             |
| CATSPERB     |                                               | 7 156551269 156750888  | 0.073433              | -1.57            | 0.350537              | 1.51             | 0.378202              | -1.30            |
| CFAP57       | cilia- and flagella-associated protein 57 iso | 1 184359738 184435878  | 0.073501              | 1.73             | 0.303045              | -1.73            | 0.000476              | -2.70            |
| PTPN5        | tyrosine-protein phosphatase non-receptor     | 14 48871382 48915407   | 0.073535              | 3.22             | 0.883127              | 1.25             | 0.290729              | 2.34             |
| LYAR         | cell growth-regulating nucleolar protein iso  | 5 8682307 8699057      | 0.073535              | 1.26             | 0.997459              | 1.00             | 0.756724              | -1.06            |
| LOC102127437 |                                               | 8 37841174 37920380    | 0.073542              | 3.20             | 0.436569              | 3.77             | 0.680978              | -1.43            |
| CSAR1        | C5a anaphylatoxin chemotactic receptor 1      | 19 48103695 48122042   | 0.073542              | -1.61            | 0.436939              | -1.46            | 0.669682              | -1.16            |
| ENKUR        | uncharacterized protein LOC101865858          | 9 25501175 25516114    | 0.073544              | 2.86             | 0.531449              | -2.25            | 0.952455              | -1.06            |
| RAN          | GTP-binding nuclear protein Ran               | 11 135282525 135285870 | 0.073544              | -1.35            | 0.987179              | -1.01            | 0.905884              | 1.03             |
| ZBED5        | zinc finger BED domain-containing prote       | 14 56936177 56938180   | 0.073571              | -1.33            | 0.672273              | 1.15             | 0.776533              | 1.06             |
| SMG1         | serine/threonine-protein kinase SMG1 iso      | 20 18186139 18298017   | 0.073575              | -1.23            | 0.464965              | 1.17             | 0.816056              | 1.04             |
| PHRF1        | PHD and RING finger domain-containing         | 14 400251 432641       | 0.073629              | 1.12             | 0.697711              | 1.06             | 0.220510              | -1.10            |
| MSMB         | beta-microseminoprotein                       | 9 45032556 45044825    | 0.073635              | 3.20             | 0.709377              | 1.74             | 0.326591              | -2.14            |
| DYNLRB2      | dynein light chain roadblock-type 2 isoform   | 20 68796618 68806165   | 0.073635              | 1.48             | 0.712257              | -1.19            | 0.063383              | -1.57            |
| LOC107129995 |                                               | 6 60749107 60757145    | 0.073635              | -1.59            | 0.480781              | 1.40             | 0.665213              | 1.16             |
| CACNA1F      | voltage-dependent L-type calcium channe       | X 47739591 47764831    | 0.073769              | 1.86             | 0.068075              | -2.70            | 0.040564              | -2.19            |
| ZNF561       | zinc finger protein 561 isoform X4            | 19 9889937 9899096     | 0.073796              | 1.23             | 0.911091              | 1.04             | 0.984947              | -1.00            |
| LOC102147190 | proprotein convertase subtilisin/kexin type   | 14 113053269 113091604 | 0.073821              | 6.41             | 0.985802              | -1.07            | 0.494070              | 2.30             |
| RCHY1        | RING finger and CHY zinc finger domain        | 5 58966932 59005110    | 0.073887              | -1.20            | 0.583525              | 1.12             | 0.527555              | 1.08             |
| MYBPC3       | myosin-binding protein C, cardiac-type iso    | 14 20204459 20226811   | 0.073897              | 1.62             | 0.171253              | 2.42             | 0.585101              | -1.24            |
| RSPH6A       | radial spoke head protein 6 homolog A iso     | 0 2361 24252           | 0.073897              | -2.24            | 0.695645              | 1.46             | 0.871015              | 1.11             |
| THEG         | testicular haploid expressed gene protein i   | 19 99094 116051        | 0.074215              | 31.25            | 1.000000              | 1.83             | 0.525338              | 4.86             |
| LOC102128974 | olfactory receptor 2L5                        | 1 1149767 1150705      | 0.074215              | 6.06             | 0.266775              | 9.63             | 0.145254              | -5.68            |
| NME9         | thioredoxin domain-containing protein 6 i     | 2 40438791 40467988    | 0.074215              | 5.07             | 0.741448              | 2.61             | 0.211855              | -4.29            |
| CCDC170      | coiled-coil domain-containing protein 170     | 4 57735904 57824174    | 0.074215              | 3.92             | 0.775251              | 1.89             | 0.874457              | 1.21             |
| PTCRA        | pre T-cell antigen receptor alpha isoform     | 4 127653319 127666900  | 0.074215              | 2.26             | 0.828194              | -1.24            | 0.952356              | -1.04            |
| LOC102132330 | uncharacterized protein LOC102132330          | 15 107407724 107415092 | 0.074215              | 1.72             | 0.099212              | 2.25             | 0.737040              | 1.15             |
| RIC3         | protein RIC-3 isoform X1                      | 14 59675644 59729441   | 0.074215              | 1.57             | 0.172423              | 1.78             | 0.006873              | -1.98            |
| EHMT1        | histone-lysine N-methyltransferase EHMT       | 15 399698 536227       | 0.074215              | 1.12             | 0.912161              | 1.02             | 0.904642              | 1.01             |
| TIMM9        | mitochondrial import inner membrane tra       | 7 122680133 122683057  | 0.074215              | -1.23            | 0.435282              | 1.18             | 0.721518              | -1.05            |
| LOC102125503 | putative male-specific lethal-3 protein-like  | 12 123697317 123698450 | 0.074215              | -1.37            | 0.422919              | -1.32            | 0.072627              | 1.44             |
| MAPK3        | mitogen-activated protein kinase 3 isoform    | 20 28624313 28629779   | 0.074259              | 1.25             | 0.756113              | 1.09             | 0.625111              | -1.08            |
| WNT4         | protein Wnt-4                                 | 1 206309521 206318908  | 0.074267              | 1.51             | 0.108078              | -1.79            | 0.283114              | -1.34            |
| LOC107131105 |                                               | 1 102437340 102439499  | 0.074301              | 3.38             | 0.584903              | 2.02             | 0.514117              | -1.74            |
| ARID3B       | AT-rich interactive domain-containing pro     | 7 52573566 52632071    | 0.074425              | 1.27             | 0.836007              | -1.07            | 0.215833              | 1.22             |
| PRMT3        | protein arginine N-methyltransferase 3 iso    | 14 47115852 47244844   | 0.074425              | -1.27            | 0.615978              | -1.15            | 0.563394              | -1.10            |
| DYNLT3       | uncharacterized protein LOC101925601          | X 36029012 36036110    | 0.074425              | -1.58            | 0.011799              | 2.50             | 0.482639              | 1.25             |
| SSTR2        | somatostatin receptor type 2                  | 16 70364253 70365362   | 0.074469              | 4.27             | 0.497942              | 2.83             | 0.747297              | -1.42            |
| SDC2         | syndecan-2                                    | 8 97662482 9775591     | 0.074469              | -1.61            | 0.986857              | 1.01             | 0.831167              | -1.08            |
| SPHK1        | sphingosine kinase 1 isoform X2               | 16 73759916 73762436   | 0.074469              | -2.03            | 0.736979              | -1.34            | 0.215627              | -1.78            |
| LOC102125746 |                                               | 0 477 2404             | 0.074473              | 4.40             | 0.900293              | 1.31             | 0.897815              | -1.15            |
| KIRREL       | kin of IRRE-like protein 1 isoform X2         | 1 93631071 93734105    | 0.074473              | 1.43             | 0.496292              | -1.30            | 0.428839              | 1.22             |
| CNIH1        | cornichon family AMPA receptor auxilia        | 7 118630972 118644941  | 0.074475              | -1.53            | 0.390165              | 1.45             | 0.624094              | 1.16             |
| BACE1        | beta-secretase 1                              | 14 113246612 113273588 | 0.074625              | 1.18             | 0.027733              | -1.35            | 0.697442              | -1.05            |
| SCUBE1       | signal peptide, CUB and EGF-like domain       | 10 7686443 7831150     | 0.074718              | 2.03             | 0.369451              | 1.90             | 0.866481              | 1.10             |
| TG           | thyroglobulin                                 | 8 134238145 134512796  | 0.074718              | 1.43             | 0.542966              | -1.27            | 0.152729              | 1.38             |
| LOC107128292 |                                               | 19 54635102 54640648   | 0.074815              | 1.57             | 0.747060              | -1.22            | 0.425769              | 1.30             |
| SLC3A2       | uncharacterized protein LOC101866986          | 14 11377515 11382076   | 0.074856              | -1.30            | 0.823434              | -1.08            | 0.096016              | -1.31            |
| HSPB6        | uncharacterized protein LOC101866124          | 19 36206015 36207509   | 0.074877              | 2.06             | 0.007435              | 4.56             | 0.107981              | -2.07            |
| LRRC1        | leucine-rich repeat and coiled-coil domain    | 8 86348726 86389331    | 0.074877              | -1.35            | 0.989665              | 1.01             | 0.222323              | 1.28             |
| DHRS7        | dehydrogenase/reductase SDR family mem        | 7 124428743 124448843  | 0.074898              | -1.35            | 0.147980              | -1.49            | 0.923545              | -1.02            |
| ARPP19       | cAMP-regulated phosphoprotein 19 isofo        | 7 29557573 29574727    | 0.074905              | -1.28            | 0.204363              | 1.34             | 0.816647              | 1.05             |
| WDR31        | WD repeat-containing protein 31 isoform       | 15 24247580 24262756   | 0.074991              | 2.16             | 0.900598              | 1.15             | 0.963393              | 1.00             |
| PRR13        | proline-rich protein 13                       | 11 52304679 52309793   | 0.074991              | -1.25            | 0.612411              | -1.14            | 0.816647              | -1.04            |
| PIH1D3       | protein PIH1D3                                | X 104314449 104342905  | 0.075029              | 5.98             | 0.799808              | -2.13            | 0.951936              | -1.11            |
| LOC102134086 |                                               | 1 30111521 30117652    | 0.075029              | -1.96            | 0.386171              | 1.79             | 0.164016              | 1.81             |
| SEC62        | translocation protein SEC62                   | 2 74169008 74196578    | 0.075104              | -1.20            | 0.002249              | 1.52             | 0.892082              | 1.02             |
| PSPC1        | paraspeckle component 1 isoform X3            | 17 16699373 1772614    | 0.075104              | -1.23            | 0.901956              | -1.04            | 0.730623              | -1.05            |
| ATP6V0C      | V-type proton ATPase 16 kDa proteolipid       | 20 2624800 2625432     | 0.075104              | -1.32            | 0.346028              | -1.30            | 0.061681              | -1.37            |
| SI00A3       | protein S100-A3                               | 1 98325895 98326698    | 0.075104              | -2.46            | 0.954085              | 1.09             | 0.400485              | -1.64            |
| ERO1A        | ERO1-like protein alpha isoform X2            | 7 116764369 116810382  | 0.075213              | -1.67            | 0.956287              | 1.05             | 0.462526              | 1.30             |
| PNMAL1       | PNMA-like protein 1 isoform X1                | 19 47230791 47233275   | 0.075238              | 1.56             | 0.132976              | -1.80            | 0.699781              | -1.13            |
| CHD4         | chromodomain-helicase-DNA-binding pro         | 11 6828492 6891832     | 0.075253              | 1.24             | 0.811777              | -1.07            | 0.720820              | 1.06             |
| MYO5C        | unconventional myosin-Vc isoform X2           | 7 29191082 29300228    | 0.075272              | -1.40            | 0.294494              | -1.42            | 0.813893              | -1.06            |
| LRRC63       | leucine-rich repeat-containing protein 63     | 17 25415715 25479011   | 0.075344              | -2.00            | 0.897614              | -1.13            | 0.578897              | 1.32             |
| MEPCE        | 7SK snRNA methylphosphate capping en          | 3 44680912 44684490    | 0.075389              | 1.19             | 0.929085              | 1.02             | 0.112320              | -1.59            |
| C10H20orf24  | uncharacterized protein C20orf24 homolo       | 10 68159487 68165591   | 0.075389              | -1.29            | 0.816756              | -1.08            | 0.547908              | -1.11            |
| LOC102122199 | eosinophil cationic protein-like              | 7 84436595 84437077    | 0.075419              | -2.75            | 0.002433              | 10.43            | 0.313159              | -1.98            |
| FOSL1        | fos-related antigen 1 isoform X1              | 14 8610821 8619888     | 0.075419              | -4.61            | 0.878302              | 1.40             | 0.466958              | -2.13            |
| ADGRB2       | adhesion G protein-coupled receptor B2 iso    | 1 196288121 196317748  | 0.075644              | 1.48             | 0.755853              | -1.17            | 0.066881              | 1.54             |
| KCTD6        | BTB/POZ domain-containing protein KC          | 2 113879714 113882621  | 0.075644              | -1.23            | 0.494657              | 1.17             | 0.966206              | -1.01            |
| PAQR9        | progesterin and adipoQ receptor family mem    | 2 45071791 45084074    | 0.075767              | 3.76             | 0.541281              | 2.51             | 0.796115              | 1.22             |
| PPT2         | lysosomal thioesterase PPT2 isoform X1        | 4 138730472 138747420  | 0.075774              | 1.29             | 0.656415              | 1.14             | 0.833866              | 1.04             |
| POLR3GL      | DNA-directed RNA polymerase III subun         | 1 104351725 104364728  | 0.075839              | 1.21             | 0.678835              | 1.10             | 0.455156              | -1.10            |
| AMPH         | amphiphysin isoform X1                        | 3 81874537 82119766    | 0.075857              | 3.81             | 0.747610              | -1.62            | 0.922723              | -1.11            |
| CPNE5        | copine-5 isoform X1                           | 4 133892727 133989075  | 0.075857              | 2.18             | 0.126567              | -2.82            | 0.667819              | 1.26             |
| KCNA6        | potassium voltage-gated channel subfamil      | 11 5005933 5007525     | 0.075857              | 2.18             | 0.430084              | -1.88            | 0.262693              | 1.79             |
| F11R         | uncharacterized protein LOC101925695          | 1 90634955 90654564    | 0.075857              | 1.25             | 0.806627              | 1.07             | 0.609997              | -1.09            |
| UBAP2L       | ubiquitin-associated protein 2-like isoform   | 1 97565995 97618986    | 0.075857              | 1.20             | 0.873227              | -1.04            | 0.497532              | 1.09             |
| ZDHHC14      | probable palmitoyltransferase ZDHHC14         | 4 63758633 64055844    | 0.075857              | -1.20            | 0.110104              | 1.31             | 0.699070              | 1.06             |



| Gene symbol  | Gene name                                                         | chr_start_end          | Day3 adjusted P-value | Day3 fold change | Day5 adjusted P-value | Day5 fold change | Day7 adjusted P-value | Day7 fold change |
|--------------|-------------------------------------------------------------------|------------------------|-----------------------|------------------|-----------------------|------------------|-----------------------|------------------|
| ORC2         | origin recognition complex subunit 2                              | 12 90278122 90332095   | 0.075857              | -1.23            | 0.904679              | -1.04            | 0.977085              | -1.01            |
| LOC102137775 | 60S ribosomal protein L29-like                                    | 6 161078245 161078718  | 0.075857              | -1.38            | 0.784459              | 1.12             | 0.503562              | 1.17             |
| LRP11        | low-density lipoprotein receptor-related protein 11               | 4 55786269 55832597    | 0.075857              | -1.53            | 0.775645              | 1.17             | 0.892311              | 1.05             |
| LOC102128784 |                                                                   | 2 161811961 161925560  | 0.075857              | -1.86            | 0.982310              | 1.02             | 0.628090              | 1.25             |
| MRPL50       | 39S ribosomal protein L50, mitochondria                           | 15 36338064 36356068   | 0.076004              | -1.36            | 0.736218              | 1.14             | 0.857760              | 1.05             |
| CCNO         | cyclin-O                                                          | 6 54669311 54671444    | 0.076009              | 2.69             | 0.927990              | -1.18            | 0.039889              | -4.13            |
| LOC102132369 |                                                                   | 19 19400387 19407538   | 0.076043              | -1.83            | 0.271883              | -1.92            | 0.555388              | -1.29            |
| SNTG1        | gamma-1-syntrophin isoform X1                                     | 8 51301398 51699918    | 0.076171              | -6.32            | 1.000000              | -1.59            | 1.000000              | -3.43            |
| LOC102145756 | galactoside 3(4)-L-fucosyltransferase                             | 19 5996869 5997987     | 0.076238              | 9.71             | 1.000000              | -5.83            | 0.421395              | 4.44             |
| SPATA20      | spermatogenesis-associated protein 20 isoform X1                  | 16 35948097 35956752   | 0.076238              | -1.66            | 0.644997              | 1.31             | 0.678291              | -1.17            |
| IKZF3        | zinc finger protein Aiolos isoform X1                             | 16 51379787 51474944   | 0.076253              | 1.72             | 0.872158              | -1.13            | 0.352357              | 1.39             |
| THOC1        | THO complex subunit 1                                             | 18 61473584 61525681   | 0.076296              | -1.25            | 0.890289              | 1.05             | 0.253916              | -1.18            |
| UBXN6        | uncharacterized protein LOC101865386                              | 19 4497711 4510749     | 0.076369              | 1.27             | 0.311814              | -1.27            | 0.056657              | -1.32            |
| KIAA1549     | UPF0606 protein KIAA1549 homolog isoform X1                       | 3 17181781 171900637   | 0.076396              | 1.40             | 0.563129              | -1.22            | 0.826987              | -1.06            |
| MCM9         | DNA helicase MCM9 isoform X1                                      | 4 22787664 22908655    | 0.076514              | -1.17            | 0.834460              | 1.05             | 0.094080              | 1.18             |
| VPS37A       | vacuolar protein sorting-associated protein 37A                   | 8 17235791 17275741    | 0.076514              | -1.34            | 0.823893              | 1.09             | 0.676461              | 1.09             |
| NR1H3        | oxysterols receptor LXR-alpha isoform X1                          | 14 20288296 20298320   | 0.076518              | -1.59            | 0.085064              | -2.02            | 0.372555              | -1.33            |
| LOC101865550 | probable palmitoyltransferase ZDHHC11                             | 6 483650 599562        | 0.076598              | 1.86             | 0.273290              | -1.93            | 0.010754              | -2.47            |
| PTPM1        | phosphatidylylglycerophosphatase and protein tyrosine phosphatase | 14 19963749 19970957   | 0.076619              | -1.24            | 0.494657              | -1.17            | 0.540090              | -1.10            |
| ST3GAL6      | type 2 lactosamine alpha-2,3-sialyltransferase 6                  | 2 173376423 173432761  | 0.076619              | -1.35            | 0.872610              | -1.07            | 0.777898              | -1.07            |
| SCARA5       | scavenger receptor class A member 5                               | 8 28316803 28433190    | 0.076631              | 1.76             | 0.832630              | 1.18             | 0.505424              | 1.30             |
| TRMT10C      | mitochondrial ribonuclease P protein 1                            | 2 170579166 170580422  | 0.076642              | -1.36            | 0.583525              | 1.21             | 0.656710              | 1.11             |
| ATP6         | ATP synthase F0 subunit 6                                         | MT 8525 9205           | 0.076728              | -1.35            | 0.559823              | -1.21            | 0.878823              | 1.04             |
| PPAT         | amidophosphoribosyltransferase isoform X1                         | 5 77993118 78033415    | 0.076728              | -1.42            | 0.465222              | 1.31             | 0.423504              | 1.21             |
| MYLK3        | myosin light chain kinase 3 isoform X3                            | 20 34362035 34417773   | 0.076770              | -2.21            | 0.135805              | -3.36            | 0.374458              | 1.66             |
| FABP7        | uncharacterized protein LOC101865805                              | 4 26824019 26828022    | 0.076912              | 2.55             | 0.711040              | 1.52             | 0.261474              | -2.04            |
| LOC102140892 | ferritin heavy polypeptide-like 17                                | X 35681868 35683264    | 0.076922              | -5.76            | 0.825364              | 1.88             | 0.273510              | -3.68            |
| BMPRI1B      | bone morphogenetic protein receptor type 1B                       | 5 94288185 94389117    | 0.077130              | 1.92             | 0.966330              | 1.00             | 0.362300              | -1.56            |
| MAGED2       | melanoma-associated antigen D2                                    | X 53928401 53934757    | 0.077130              | 1.19             | 0.210595              | -1.23            | 0.969193              | 1.01             |
| TRIM39       | E3 ubiquitin-protein ligase TRIM39                                | 4 140597457 140610386  | 0.077130              | 1.11             | 0.429592              | -1.10            | 0.378328              | -1.07            |
| NFATC3       | nuclear factor of activated T-cells, cytoplasmic 3                | 20 56294761 56463948   | 0.077249              | 1.16             | 0.051634              | -1.28            | 0.773919              | 1.03             |
| RWDD2A       | RWD domain-containing protein 2A                                  | 4 90672070 90673892    | 0.077494              | -1.39            | 0.973627              | -1.02            | 0.958012              | 1.02             |
| FADS1        | fatty acid desaturase 1                                           | 14 12450475 12464386   | 0.077547              | 1.34             | 0.793115              | 1.10             | 0.491856              | 1.15             |
| ATP5E        | ATP synthase subunit epsilon, mitochondrial                       | 10 90924467 90926408   | 0.077547              | -1.26            | 0.414458              | -1.21            | 0.144009              | -1.24            |
| SERP1        | stress-associated endoplasmic reticulum protein 1                 | 2 52782238 52784682    | 0.077547              | -1.41            | 0.579596              | 1.24             | 0.566174              | 1.15             |
| DFNA5        | non-syndromic hearing impairment protein 5                        | 3 96033448 96084938    | 0.077547              | -1.68            | 0.001879              | -3.47            | 0.917912              | -1.05            |
| ZBTB32       | zinc finger and BTB domain-containing protein 32                  | 19 36162551 36166273   | 0.077679              | 1.92             | 0.534294              | -1.54            | 0.976301              | 1.02             |
| PRIM2        | DNA primase large subunit                                         | 4 113047053 113354489  | 0.077706              | -1.19            | 0.906846              | 1.03             | 0.158617              | 1.17             |
| SDR16C5      | uncharacterized protein LOC101926736                              | 8 57371661 57386569    | 0.077880              | -1.76            | 0.560583              | 1.44             | 0.449888              | -1.35            |
| EYA2         | eyes absent homolog 2 isoform X1                                  | 10 78686404 78893332   | 0.077921              | 1.41             | 0.624033              | 1.21             | 0.197235              | 1.34             |
| FBLN1        | fibulin-1                                                         | 10 5411163 5458656     | 0.078006              | 1.37             | 0.171253              | 1.50             | 0.199690              | 1.31             |
| EEA1         | early endosome antigen 1 isoform X2                               | 11 96436703 96597155   | 0.078189              | -1.39            | 0.180254              | 1.52             | 0.498446              | 1.17             |
| LOC102135860 | uncharacterized protein LOC102135860                              | 15 100295712 100334186 | 0.078189              | -1.76            | 0.762791              | 1.26             | 0.231905              | 1.58             |
| MAPK4        | mitogen-activated protein kinase 4 isoform X1                     | 18 31006670 31072726   | 0.078403              | 2.62             | 0.151127              | 3.63             | 0.801541              | -1.22            |
| CCNI         | cyclin-I isoform X1                                               | 5 57435618 57453277    | 0.078403              | 1.18             | 0.969025              | 1.01             | 0.709257              | -1.05            |
| SIGLEC15     | sialic acid-binding Ig-like lectin 15                             | 18 36068504 36084972   | 0.078409              | 1.93             | 0.034258              | -3.32            | 0.286852              | -1.56            |
| LOC102144501 |                                                                   | 17 3606583 3635872     | 0.078447              | 4.49             | 1.000000              | -1.87            | 0.168785              | 4.36             |
| LOC102124658 | 40S ribosomal protein S17                                         | 16 24519688 24520095   | 0.078447              | -3.32            | 0.956287              | 1.11             | 0.666368              | -1.53            |
| LOC102115513 | SH3 domain and tetratricopeptide repeat-containing protein 1      | 0 2176 5499            | 0.078634              | -1.57            | 0.534560              | 1.35             | 0.446095              | -1.27            |
| LOC102143040 | LOW QUALITY PROTEIN: uncharacterized protein LOC102143040         | 15 30831755 30832333   | 0.078635              | -2.21            | 0.778436              | -1.38            | 0.692538              | -1.25            |
| C14H11orf16  | LOW QUALITY PROTEIN: uncharacterized protein LOC102143040         | 14 58904114 58915045   | 0.078647              | 3.90             | 0.542510              | 3.12             | 0.610423              | -1.82            |
| CCDC173      | coiled-coil domain-containing protein 173                         | 12 58509097 58571503   | 0.078854              | 1.84             | 0.870434              | -1.16            | 0.622955              | -1.25            |
| LOC102128005 | keratin, type II cytoskeletal 6A                                  | 11 51335658 51340332   | 0.078886              | -9.23            | 0.552139              | 4.30             | 0.750778              | -1.70            |
| ADGB         | androglobin isoform X1                                            | 4 52430326 52667418    | 0.078925              | 3.19             | 0.972212              | 1.08             | 0.456614              | -1.87            |
| CD79B        | B-cell antigen receptor complex-associated protein 2              | 16 61259304 61262337   | 0.078925              | 1.81             | 0.099882              | -2.42            | 0.836262              | 1.10             |
| ATP6V0B      | V-type proton ATPase 21 kDa proteolipid                           | 1 183594244 183597251  | 0.078925              | -1.25            | 0.217498              | -1.31            | 0.017073              | -1.37            |
| BNIP3L       | BCL2/adenovirus E1B 19kDa interacting protein 3-like              | 8 26806757 26827651    | 0.078925              | -1.26            | 0.882966              | 1.05             | 0.231594              | 1.20             |
| ZNF770       | zinc finger protein 770                                           | 7 11759209 11761281    | 0.078925              | -1.53            | 0.267421              | 1.59             | 0.425573              | 1.27             |
| LOC102117705 | methyltransferase-like protein 7A isoform X1                      | 11 51082131 51098895   | 0.078928              | 1.79             | 0.375878              | 1.87             | 0.519687              | 1.30             |
| SPTLC1       | serine palmitoyltransferase 1 isoform X1                          | 15 106089463 106180618 | 0.078928              | -1.45            | 0.851300              | 1.10             | 0.680028              | 1.12             |
| TLL10        | protein polyglycolase TLL10 isoform X1                            | 1 227217475 227248170  | 0.078939              | 2.87             | 0.816202              | 1.40             | 0.520841              | -1.62            |
| BRPF1        | peregrin isoform X1                                               | 2 140719449 140732488  | 0.079046              | 1.16             | 0.842849              | 1.04             | 0.340464              | 1.10             |
| NEK9         | serine/threonine-protein kinase Nek9 isoform X1                   | 7 139775818 139818235  | 0.079088              | 1.13             | 0.964672              | 1.01             | 0.045456              | 1.16             |
| TM4SF5       | transmembrane 4 L6 family member 5                                | 16 4825735 4837092     | 0.079139              | 1.61             | 0.646891              | 1.30             | 0.030134              | -1.84            |
| BANP         | protein BANP isoform X1                                           | 20 76352209 76491337   | 0.079139              | 1.23             | 0.751819              | -1.09            | 0.417844              | -1.12            |
| C14H11orf49  | UPF0705 protein C14orf49 homolog isoform X1                       | 14 20401572 20627936   | 0.079164              | 1.35             | 0.938999              | -1.04            | 0.403142              | -1.19            |
| LRIIG2       | leucine-rich repeats and immunoglobulin-like domains protein 2    | 1 113645506 113706472  | 0.079196              | 1.23             | 0.932714              | -1.03            | 0.751155              | -1.05            |
| PFKFB4       | 6-phosphofructo-2-kinase/fructose-2,6-bisphosphatase 4            | 2 103640013 103681258  | 0.079323              | -1.54            | 0.985686              | 1.01             | 0.746287              | 1.11             |
| CARD10       | cardinal 10                                                       | 10 13748878 13777764   | 0.079429              | 1.50             | 0.535716              | 1.32             | 0.926306              | -1.03            |
| SNTA1        | alpha-1-syntrophin isoform X1                                     | 10 64728002 64765283   | 0.079459              | 1.57             | 0.707734              | -1.23            | 0.664806              | -1.15            |
| LOC107126496 | putative inactive fatty acyl-CoA reductase                        | 12 1633079 1641430     | 0.079459              | -2.05            | 0.626868              | 1.52             | 0.219361              | -1.88            |
| RGS4         | regulator of G-protein signaling 4                                | 1 21139542 21145137    | 0.079582              | 2.84             | 0.861042              | -1.29            | 0.792323              | -1.24            |
| LOC102129378 |                                                                   | 16 33897176 33900406   | 0.079582              | 1.92             | 0.896708              | -1.14            | 0.165343              | -1.89            |
| NEMP2        | nuclear envelope integral membrane protein 2                      | 12 79682189 79754678   | 0.079599              | -1.19            | 0.951185              | -1.02            | 0.409716              | 1.11             |
| C14H11orf31  | selenoprotein H                                                   | 14 15867500 15868121   | 0.079604              | -1.28            | 0.733535              | -1.11            | 0.942192              | -1.02            |
| JAKMIP3      | janus kinase and microtubule-interacting protein 3                | 9 131556904 131614995  | 0.079751              | 1.75             | 0.878397              | 1.14             | 0.849649              | -1.08            |
| ERBB3        | receptor tyrosine-protein kinase erbB-3                           | 11 54996997 55017507   | 0.079751              | 1.44             | 0.806347              | 1.13             | 0.523852              | -1.18            |
| LOC102116901 |                                                                   | 13 55619134 55639082   | 0.079763              | 2.98             | 0.463251              | 2.33             | 0.289943              | -2.24            |
| TIMM10       | mitochondrial import inner membrane translocator subunit 10       | 14 16091193 16092983   | 0.079763              | -1.28            | 0.700674              | -1.12            | 0.154037              | -1.25            |
| ELMO1        | engulfment and cell motility protein 1 isoform X1                 | 3 83226235 83694376    | 0.080024              | 1.24             | 0.447197              | 1.19             | 0.743212              | 1.06             |
| MSC          | musculin                                                          | 8 73050044 73051556    | 0.080042              | -1.92            | 0.097252              | -2.65            | 0.663013              | 1.24             |
| CHST9        | carbohydrate sulfotransferase 9 isoform X1                        | 18 55137732 55393287   | 0.080115              | 4.67             | 0.973217              | 1.10             | 0.467419              | -2.25            |
| NWD1         | LOW QUALITY PROTEIN: NACHT domain-containing protein 1            | 19 17016230 17113648   | 0.080304              | 5.73             | 0.931493              | 1.29             | 0.773601              | -1.50            |
| LOC102141725 | serum amyloid A-4 protein isoform X1                              | 14 49449965 49454315   | 0.080304              | -8.03            | 1.000000              | -1.08            | 0.884182              | -1.22            |
| LOC102127257 |                                                                   | 12 11781148 11787717   | 0.080362              | 2.34             | 0.261426              | 3.38             | 0.868039              | 1.12             |
| CD8B         | T-cell surface glycoprotein CD8 beta chain                        | 13 20433146 20476150   | 0.080409              | -1.67            | 0.871307              | -1.13            | 0.882138              | 1.06             |
| TRIM63       | E3 ubiquitin-protein ligase TRIM63                                | 1 202275242 202291795  | 0.080528              | 2.01             | 0.631386              | -1.47            | 0.824956              | -1.13            |

| Gene symbol  | Gene name                                     | chr_start_end          | Day3 adjusted P-value | Day3 fold change | Day5 adjusted P-value | Day5 fold change | Day7 adjusted P-value | Day7 fold change |
|--------------|-----------------------------------------------|------------------------|-----------------------|------------------|-----------------------|------------------|-----------------------|------------------|
| PITPNM1      | membrane-associated phosphatidylinositol      | 14 6920857 6933190     | 0.080528              | 1.34             | 0.106437              | -1.54            | 0.696567              | 1.09             |
| ACTR8        | actin-related protein 8 isoform X2            | 2 109206441 109219248  | 0.080634              | -1.21            | 0.605027              | 1.12             | 0.961898              | 1.01             |
| ENDOV        | endonuclease V                                | 16 77990755 78005908   | 0.080684              | -1.49            | 0.853504              | -1.11            | 0.669398              | 1.13             |
| UBE2H        | ubiquitin-conjugating enzyme E2 H isoform     | 3 162557821 162673668  | 0.080730              | 1.14             | 0.437767              | -1.12            | 0.394401              | -1.08            |
| HEBP1        | heme-binding protein 1                        | 11 13576119 13602566   | 0.080798              | -1.20            | 0.744836              | 1.08             | 0.070924              | -1.23            |
| CTDSP2       | CTD small phosphatase-like protein 2          | 7 21446930 21512455    | 0.080849              | -1.34            | 0.752777              | 1.12             | 0.115847              | 1.34             |
| LOC102144460 | serine/threonine-protein phosphatase 2A r     | 7 175615 177946        | 0.081026              | 2.34             | 0.716857              | -1.41            | 0.258108              | -1.86            |
| SLC22A15     | solute carrier family 22 member 15            | 1 110692139 110783147  | 0.081051              | -1.27            | 0.297373              | 1.28             | 0.948668              | 1.01             |
| SH3GL2       | endophilin-A1 isoform X2                      | 15 60933772 61157535   | 0.081060              | -1.48            | 0.273293              | 1.52             | 0.915854              | -1.04            |
| LOC107127511 |                                               | 15 4643757 4645255     | 0.081197              | -5.55            | 0.458135              | 3.13             | 0.980946              | 1.03             |
| CLIC1        | chloride intracellular channel protein 1 iso  | 4 139129791 139139570  | 0.081334              | -1.32            | 0.601300              | -1.18            | 0.890617              | -1.03            |
| RAB33B       | ras-related protein Rab-33B                   | 5 138772837 138793974  | 0.081342              | -1.35            | 0.000420              | 2.22             | 0.410712              | 1.19             |
| LOC102137935 |                                               | 8 96046674 96061025    | 0.081342              | -2.66            | 0.065634              | -4.56            | 0.495650              | -1.67            |
| FGF10        | fibroblast growth factor 10 precursor         | 6 45065448 45147966    | 0.081354              | 1.89             | 0.269005              | 2.02             | 0.831355              | 1.12             |
| AP15         | apoptosis inhibitor 5 isoform X1              | 14 24229060 24260578   | 0.081410              | -1.28            | 0.472936              | 1.21             | 0.403973              | 1.16             |
| LOC102124508 | uncharacterized protein LOC102124508          | 1 140605866 140606159  | 0.081426              | 1.58             | 0.635378              | 1.29             | 0.807605              | -1.09            |
| YTHDC2       | probable ATP-dependent RNA helicase Y         | 6 112293278 112363010  | 0.081549              | -1.34            | 0.404759              | 1.29             | 0.437840              | 1.17             |
| RASSF6       | ras association domain-containing protein     | 5 60983774 61027322    | 0.081640              | -1.38            | 0.986913              | -1.01            | 0.808987              | 1.07             |
| DYNC1H1      | cytoplasmic dynein 1 intermediate chain l     | 3 115885563 116170913  | 0.081739              | 2.30             | 0.051541              | 4.09             | 0.568825              | -1.41            |
| C14H11orf95  | uncharacterized protein C14orf95 homolo       | 14 10824086 10826865   | 0.081764              | 1.48             | 0.360478              | -1.44            | 0.909238              | 1.04             |
| SPA17        | sperm surface protein Sp17                    | 14 120473042 120493057 | 0.081859              | 1.66             | 0.426274              | -1.57            | 0.731396              | -1.15            |
| DYDC1        | DPY30 domain-containing protein 1             | 9 55578942 55595671    | 0.081960              | 7.39             | 1.000000              | -3.81            | 0.903254              | 1.28             |
| TRPV4        | transient receptor potential cation channel   | 11 113446434 113475404 | 0.081960              | 1.43             | 0.002310              | -2.28            | 0.810554              | 1.07             |
| VPS51        | vacuolar protein sorting-associated protein   | 14 9419441 9448220     | 0.081960              | 1.23             | 0.685480              | -1.11            | 0.107659              | -1.24            |
| WSB2         | WD repeat and SOCS box-containing pro         | 11 121825529 121851487 | 0.082026              | -1.34            | 0.934798              | -1.04            | 0.547372              | 1.14             |
| HIVEP2       | transcription factor HIVEP2                   | 4 47269325 47291250    | 0.082090              | 1.29             | 0.471956              | 1.21             | 0.617531              | -1.10            |
| ZNF134       | uncharacterized protein LOC101926097          | 19 58270993 58272267   | 0.082143              | 1.19             | 0.243468              | 1.23             | 0.932087              | -1.01            |
| ZNF2         | zinc finger protein 2 isoform X1              | 13 5581486 564660      | 0.082182              | 1.24             | 0.931523              | -1.03            | 0.583858              | 1.09             |
| LOC102132001 | histone H4                                    | 11 15389116 15389427   | 0.082282              | 1.37             | 0.417941              | -1.31            | 0.251499              | 1.30             |
| NELL2        | protein kinase C-binding protein NELL2 i      | 11 43101557 43501157   | 0.082376              | -2.03            | 0.446859              | -1.76            | 0.794481              | -1.16            |
| COL8A1       | collagen alpha-1(VIII) chain isoform X2       | 2 172363667 172394307  | 0.082444              | -1.35            | 0.458081              | -1.27            | 0.535930              | 1.14             |
| E2F1         | transcription factor E2F1                     | 10 65014160 65025109   | 0.082603              | -1.55            | 0.733100              | -1.21            | 0.894073              | 1.05             |
| LOC102134093 |                                               | 1 90842492 90906590    | 0.082650              | -1.77            | 0.132976              | -2.25            | 0.949671              | 1.03             |
| EPHB4        | ephrin type-B receptor 4 isoform X2           | 3 45102495 45131021    | 0.082734              | 1.30             | 0.296405              | 1.32             | 0.352357              | 1.18             |
| GAB2         | GRB2-associated-binding protein 2             | 14 73579468 73779052   | 0.082763              | 1.23             | 0.289990              | -1.24            | 0.537421              | -1.10            |
| SNX4         | sorting nexin-4 isoform X1                    | 2 146601108 146680955  | 0.082831              | -1.29            | 0.069374              | 1.51             | 0.565608              | 1.11             |
| BRWD3        | bromodomain and WD repeat-containing          | X 77646964 77776166    | 0.082897              | -1.36            | 0.329312              | 1.36             | 0.221250              | 1.29             |
| LOC101925770 | nucleoside diphosphate kinase A isoform       | 16 36567860 36574795   | 0.083011              | -1.45            | 0.928688              | 1.05             | 0.895667              | 1.04             |
| KIAA1614     | uncharacterized protein KIAA1614 homo         | 1 38788880 38827041    | 0.083068              | 1.45             | 0.802972              | 1.14             | 0.845812              | 1.06             |
| TNKS1BP1     | 182 kDa tankyrase-1-binding protein isofo     | 14 16302906 16325225   | 0.083096              | 1.31             | 0.435372              | -1.25            | 0.655570              | -1.09            |
| LOC102145055 | U2 snRNP component HSH155                     | 12 86576757 86585460   | 0.083112              | -1.18            | 0.962250              | 1.01             | 0.532573              | -1.08            |
| LOC102132303 | solute carrier family 22 member 20-like       | 14 9282395 9286283     | 0.083180              | 2.84             | 0.310650              | -3.00            | 0.486693              | -1.60            |
| LOC102130131 |                                               | 14 71535390 71544203   | 0.083207              | 2.30             | 0.040276              | -2.86            | 0.423916              | -1.44            |
| FRMPD2       | FERM and PDZ domain-containing prote          | 9 46802191 46903601    | 0.083361              | 4.54             | 0.336337              | 8.47             | 0.694008              | -1.63            |
| SMCO3        | single-pass membrane and coiled-coil do       | 11 15425765 15429630   | 0.083361              | 1.36             | 0.000003              | 2.80             | 0.481898              | 1.16             |
| LOC102130574 |                                               | 3 2417715 2419729      | 0.083380              | -1.33            | 0.668124              | -1.16            | 0.204742              | -1.28            |
| CDR2         | cerebellar degeneration-related protein 2     | 20 21191344 21222677   | 0.083530              | 1.40             | 0.677554              | 1.18             | 0.922610              | 1.03             |
| CSRNP1       | cysteine/serine-rich nuclear protein 1 isofo  | 2 94063917 94070936    | 0.083627              | 1.36             | 0.760138              | 1.13             | 0.510689              | -1.16            |
| GCSH         | glycine cleavage system H protein, mitoch     | 20 69338881 69351486   | 0.083627              | -1.28            | 0.782249              | 1.09             | 0.731580              | -1.07            |
| ZFYVE16      | zinc finger FYVE domain-containing prot       | 6 78715452 78758340    | 0.083627              | -1.32            | 0.459327              | 1.24             | 0.474043              | 1.15             |
| PCDH12       | protocadherin-12                              | 6 141096801 141109567  | 0.083661              | 1.42             | 0.721589              | 1.17             | 0.289865              | 1.29             |
| KIAA0556     | uncharacterized protein KIAA0556 homo         | 20 26476541 26708934   | 0.083716              | 1.22             | 0.387726              | -1.20            | 0.668883              | -1.07            |
| UBE3B        | ubiquitin-protein ligase E3B isoform X1       | 11 113133045 113185230 | 0.083716              | 1.15             | 0.724563              | -1.07            | 0.283114              | 1.11             |
| BRCA2        | breast cancer type 2 susceptibility protein   | 17 11864386 11956321   | 0.083716              | -1.54            | 0.342562              | -1.52            | 0.645272              | 1.16             |
| DCUN1D4      | DCN1-like protein 4 isoform X1                | 5 82598491 82677449    | 0.083877              | -1.39            | 0.099882              | 1.64             | 0.801101              | 1.07             |
| SMIM13       | small integral membrane protein 13            | 4 159716908 159756512  | 0.084055              | -1.17            | 0.000000              | 1.76             | 0.313997              | 1.12             |
| KAZN         | kazrin isoform X1                             | 1 213420515 214656576  | 0.084088              | 1.54             | 0.415763              | 1.45             | 0.344968              | -1.33            |
| IFIT5        | interferon-induced protein with tetratricop   | 9 87959621 87963447    | 0.084118              | -1.60            | 0.094146              | 2.04             | 0.699781              | -1.15            |
| ACAT1        | acetyl-CoA acetyltransferase, mitochondr      | 14 104173186 104200892 | 0.084233              | 1.14             | 0.444203              | -1.12            | 0.984477              | 1.00             |
| CHRD         | chordin isoform X1                            | 2 89075701 89085365    | 0.084312              | 1.48             | 0.542210              | -1.31            | 0.807605              | 1.08             |
| BCL7A        | B-cell CLL/lymphoma 7 protein family m        | 11 126075887 126108447 | 0.084441              | 1.38             | 0.695645              | -1.17            | 0.564556              | 1.15             |
| SIX1         | homeobox protein SIX1                         | 7 124942103 124945004  | 0.084497              | 3.86             | 0.422971              | -4.83            | 0.829750              | -1.28            |
| SREBF2       | sterol regulatory element-binding protein     | 10 9167705 9257239     | 0.084515              | 1.28             | 0.481829              | -1.21            | 0.887420              | -1.03            |
| LOC102136392 | cytochrome c-like                             | 1 177302029 177302490  | 0.084548              | -3.77            | 0.964150              | 1.11             | 0.060547              | -6.21            |
| LOC102143434 |                                               | 14 69687099 69766125   | 0.084575              | 1.80             | 0.183894              | -1.97            | 0.771582              | -1.12            |
| PLCB1        | 1-phosphatidylinositol 4,5-bisphosphate p     | 10 53579383 54340137   | 0.084587              | -1.62            | 0.052235              | 2.28             | 0.918023              | -1.04            |
| APPL1        | DCC-interacting protein 13-alpha isoform      | 2 112551982 112594753  | 0.084713              | -1.42            | 0.437149              | 1.34             | 0.422487              | 1.22             |
| TRAM1        | translocating chain-associated membrane       | 8 71807993 71839353    | 0.084713              | -1.64            | 0.412126              | 1.53             | 0.482120              | 1.28             |
| CHUK         | inhibitor of nuclear factor kappa-B kinase    | 9 99096655 99138444    | 0.084775              | -1.31            | 0.268733              | 1.35             | 0.442221              | 1.16             |
| LOC102138462 | LOW QUALITY PROTEIN: serine hydro             | 10 8537934 8555021     | 0.084860              | 1.87             | 0.524319              | 1.58             | 0.659631              | -1.23            |
| CTSF         | LOW QUALITY PROTEIN: cathepsin F              | 14 7927037 7931869     | 0.084860              | 1.50             | 0.801921              | -1.15            | 0.599303              | -1.17            |
| KCNK5        | potassium channel subfamily K member 5        | 4 131478595 131520721  | 0.084860              | 1.20             | 0.996330              | 1.00             | 0.884135              | 1.02             |
| LPP          | lipoma-preferred partner isoform X1           | 2 8583519 9221082      | 0.084860              | -1.22            | 0.296748              | 1.24             | 0.464622              | 1.11             |
| TTC14        | tetratricopeptide repeat protein 14 isoform   | 2 85168991 85184577    | 0.085274              | -1.45            | 0.716823              | 1.18             | 0.945070              | 1.02             |
| NOTCH3       | neurogenic locus notch homolog protein 3      | 19 15467655 15509620   | 0.085328              | 1.38             | 0.705328              | -1.16            | 0.165348              | 1.35             |
| ABHD17B      | alpha/beta hydrolase domain-containing p      | 15 82626821 82639038   | 0.085328              | -1.37            | 0.535823              | 1.24             | 0.930592              | 1.02             |
| TGIF2        | homeobox protein TGIF2 isoform X1             | 10 68126538 68145473   | 0.085414              | 1.21             | 0.108536              | -1.32            | 0.009909              | 1.33             |
| RNASE6       | ribonuclease K6                               | 7 84330721 84331173    | 0.085414              | -1.50            | 0.695469              | -1.22            | 0.448649              | 1.24             |
| POLDIP3      | polymerase delta-interacting protein 3 iso    | 10 8432790 8461643     | 0.085469              | 1.17             | 0.859712              | 1.04             | 0.925059              | -1.01            |
| NMNAT1       | nicotinamide/nicotinic acid mononucleotid     | 1 218218176 218229365  | 0.085509              | 1.22             | 0.083623              | -1.39            | 0.670759              | -1.07            |
| ELMOD1       | ELMO domain-containing protein 1 isofo        | 14 103669218 103716672 | 0.085509              | -2.87            | 0.102200              | 5.54             | 0.969129              | 1.04             |
| LOC107126411 | Ig lambda-delta chain C region-like isoform X | 10 28450071 28451375   | 0.085528              | 1.91             | 0.759352              | 1.29             | 0.917700              | 1.06             |
| PROKR1       | prokineticin receptor 1                       | 13 41328553 41338152   | 0.085656              | 5.24             | 0.931334              | -1.22            | 0.270252              | 2.66             |
| LOC102142087 | X-linked retinitis pigmentosa GTPase reg      | X 36490396 36500976    | 0.085735              | 1.53             | 0.825928              | 1.14             | 0.815014              | -1.08            |
| SIAE         | uncharacterized protein LOC101926044          | 14 120434587 120471453 | 0.085751              | 1.45             | 0.916923              | 1.06             | 0.953436              | -1.02            |
| ZNF853       | zinc finger protein 853                       | 3 41977702 41980345    | 0.085751              | 1.38             | 0.950200              | 1.03             | 0.866481              | -1.05            |
| HTATIP2      | oxidoreductase HTATIP2 isoform X1             | 14 47249542 47267228   | 0.085751              | -1.21            | 0.085117              | -1.34            | 0.062693              | -1.24            |

| Gene symbol  | Gene name                                    | chr_start_end          | Day3 adjusted P-value | Day3 fold change | Day5 adjusted P-value | Day5 fold change | Day7 adjusted P-value | Day7 fold change |
|--------------|----------------------------------------------|------------------------|-----------------------|------------------|-----------------------|------------------|-----------------------|------------------|
| PAQR7        | membrane progesterin receptor alpha          | 1 202498282 202499322  | 0.085757              | 1.18             | 0.389723              | -1.16            | 0.673650              | -1.05            |
| KLRB1        | killer cell lectin-like receptor subfamily B | 11 9942076 9953908     | 0.085757              | -1.62            | 0.889183              | 1.10             | 0.033026              | -1.86            |
| SLC2A4       | solute carrier family 2, facilitated glucose | 16 7341982 7346686     | 0.085786              | 2.25             | 0.872158              | -1.21            | 0.975641              | 1.02             |
| LOC102118223 | C-C motif chemokine 3-like 1                 | 16 135792 137164       | 0.086096              | -2.19            | 0.247031              | -2.45            | 0.661620              | -1.30            |
| EVL          | uncharacterized protein LOC101866983         | 7 165210120 165338533  | 0.086323              | 1.26             | 0.612232              | -1.15            | 0.372985              | -1.16            |
| CALCOCO1     | calcium-binding and coiled-coil domain-c     | 11 52601888 52615963   | 0.086359              | 1.31             | 0.318221              | -1.32            | 0.380785              | -1.18            |
| HMGCLL1      | 3-hydroxymethyl-3-methylglutaryl-CoA l       | 4 115091677 115236994  | 0.086429              | 3.01             | 0.973262              | -1.07            | 0.888348              | 1.14             |
| ART5         | ecto-ADP-ribosyltransferase 5 isoform X9     | 14 67000921 67004907   | 0.086429              | 2.19             | 0.993160              | -1.01            | 0.238381              | -1.86            |
| FLI1         | Friend leukemia integration 1 transcription  | 14 124484048 124601437 | 0.086429              | 1.20             | 0.367274              | 1.18             | 0.358333              | 1.12             |
| PPP3R1       | calcineurin subunit B type 1 isoform X1      | 13 41697471 41773678   | 0.086429              | -1.25            | 0.264735              | 1.28             | 0.410589              | 1.14             |
| CCL3         | C-C motif chemokine 3                        | 16 32479692 32481066   | 0.086469              | -1.89            | 0.300636              | -1.94            | 0.995800              | -1.00            |
| DPP6         | dipeptidyl aminopeptidase-like protein 6 i   | 3 186493626 187763161  | 0.086493              | 2.50             | 0.200018              | 3.13             | 0.614174              | -1.41            |
| CAMLG        | uncharacterized protein LOC101866678         | 6 133795421 133811723  | 0.086500              | -1.22            | 0.581154              | 1.14             | 0.918688              | 1.02             |
| MMP17        | matrix metalloproteinase-17 isoform X1       | 11 136325777 136339857 | 0.086506              | 1.65             | 0.972212              | -1.03            | 0.369972              | 1.37             |
| DLG3         | disks large homolog 3 isoform X1             | X 67486524 67541578    | 0.086506              | 1.23             | 0.096705              | -1.37            | 0.777744              | -1.05            |
| LOC102136013 |                                              | 9 4797678 4989160      | 0.086610              | -1.49            | 0.964772              | 1.03             | 0.311909              | 1.32             |
| ADGRB3       | adhesion G protein-coupled receptor B3 is    | 4 104457163 105199894  | 0.086647              | 1.72             | 0.245817              | 1.86             | 0.998900              | -1.00            |
| SLC36A4      | proton-coupled amino acid transporter 4 i    | 14 89024241 89072839   | 0.086660              | -1.36            | 0.375074              | 1.33             | 0.405269              | 1.20             |
| CREBBP       | CREB-binding protein isoform X4              | 20 3998241 4153752     | 0.086853              | 1.14             | 0.801656              | 1.04             | 0.811310              | 1.02             |
| LOC102132236 | WD repeat-containing protein on Y chrom      | 2 71450714 71683428    | 0.087002              | 4.11             | 0.770625              | -2.12            | 0.048265              | -6.63            |
| SCRN1        | secernin-1 isoform X1                        | 3 90693151 90739301    | 0.087002              | 1.43             | 0.774694              | 1.14             | 0.465053              | -1.21            |
| QSOX2        | sulphydryl oxidase 2 isoform X1              | 15 2121795 2149460     | 0.087002              | 1.38             | 0.899116              | 1.06             | 0.195507              | 1.32             |
| GTF3C3       | general transcription factor 3C polypeptid   | 12 85962339 85997105   | 0.087002              | -1.18            | 0.948945              | 1.02             | 0.089928              | 1.20             |
| IDII         | isopentenyl-diphosphate Delta-isomerase      | 9 1237858 1244952      | 0.087002              | -1.65            | 0.981475              | -1.02            | 0.625495              | -1.20            |
| MRGPRX2      | mes-related G-protein coupled receptor m     | 14 48582290 48583279   | 0.087137              | 7.03             | 1.000000              | 11.93            | 0.267232              | 2.77             |
| GNL1         | guanine nucleotide-binding protein-like 1    | 4 140409467 140419918  | 0.087166              | 1.16             | 0.724842              | -1.07            | 0.238360              | -1.13            |
| EPB41L3      | band 4.1-like protein 3 isoform X29          | 18 66482151 66637866   | 0.087166              | -1.41            | 0.389044              | -1.37            | 0.641829              | 1.13             |
| LOC107131036 | Ig lambda chain V-V1 region EB4-like         | 10 29297916 29298440   | 0.087246              | 3.07             | 0.161925              | 4.29             | 0.374312              | -1.96            |
| ORMDL3       | ORM1-like protein 3                          | 16 51536324 51537949   | 0.087270              | 1.12             | 0.274113              | -1.13            | 0.560938              | -1.05            |
| GPR63        | probable G-protein coupled receptor 63       | 4 77040061 77041320    | 0.087353              | -1.41            | 0.183149              | 1.55             | 0.965116              | -1.01            |
| SCN1A        | SCN1A                                        | 12 54845254 54943479   | 0.087417              | -2.85            | 0.745066              | 1.52             | 0.134264              | -2.73            |
| LOC102124816 | clustered mitochondria protein homolog       | 20 30422682 30426529   | 0.087433              | 1.91             | 0.006367              | -4.73            | 0.664537              | 1.24             |
| ANO1         | anoctamin-1 isoform X2                       | 14 4555456 4776037     | 0.087433              | 1.60             | 0.201112              | 1.80             | 0.610403              | -1.20            |
| IRF2BP1      | interferon regulatory factor 2-binding prot  | 19 46785451 46787205   | 0.087433              | 1.22             | 0.774694              | -1.08            | 0.996126              | -1.00            |
| ELL2         | RNA polymerase II elongation factor ELI      | 6 94305924 94380705    | 0.087433              | -1.28            | 0.491465              | 1.20             | 0.776305              | 1.06             |
| GEN1         | flap endonuclease GEN homolog 1 isofor       | 13 93217054 93242170   | 0.087433              | -1.38            | 0.837239              | -1.10            | 0.470743              | 1.18             |
| HIF1AN       | hypoxia-inducible factor 1-alpha inhibitor   | 9 99468241 99480036    | 0.087508              | 1.16             | 0.919348              | -1.02            | 0.947321              | 1.01             |
| CD14         | monocyte differentiation antigen CD14        | 6 139758312 139759527  | 0.087590              | -1.51            | 0.462045              | -1.39            | 0.965635              | 1.02             |
| NAA25        | N-alpha-acetyltransferase 25, NatB auxilia   | 11 115710040 115793005 | 0.087592              | -1.30            | 0.805074              | 1.09             | 0.674852              | 1.09             |
| TRMT10A      | tRNA methyltransferase 10 homolog A          | 5 98831090 98841249    | 0.087624              | -1.49            | 0.428306              | 1.41             | 0.175334              | 1.44             |
| RAB11A       | ras-related protein Rab-11A                  | 7 43420090 43439774    | 0.087710              | -1.19            | 0.327180              | 1.19             | 0.970900              | -1.01            |
| LOC107129640 |                                              | 4 164377752 164384047  | 0.087710              | -2.57            | 0.516953              | 2.27             | 0.845582              | -1.19            |
| GLRA2        | glycine receptor subunit alpha-2 isoform X   | X 12296974 12528061    | 0.087789              | -3.77            | 0.268711              | 5.62             | 0.903254              | 1.15             |
| LOC102137348 |                                              | 11 26232173 26256003   | 0.087793              | 4.26             | 0.208785              | 3.60             | 0.265269              | -2.61            |
| UPF1         | regulator of nonsense transcripts 1 isoform  | 19 19289384 19326199   | 0.087793              | 1.16             | 0.349424              | -1.15            | 0.777670              | -1.03            |
| KDM2A        | lysine-specific demethylase 2A isoform X     | 14 7206282 7365174     | 0.087793              | 1.14             | 0.766102              | -1.05            | 0.995720              | -1.00            |
| SUPT3H       | transcription initiation protein SPT3 hom    | 4 125172503 125702439  | 0.087793              | -1.21            | 0.983881              | 1.01             | 0.977855              | 1.00             |
| MGAT4B       | alpha-1,3-mannosyl-glycoprotein 4-beta-N     | 6 179786921 179795372  | 0.087793              | -1.23            | 0.797063              | 1.07             | 0.554709              | -1.29            |
| LOC102140692 |                                              | 7 106300151 106310336  | 0.087793              | -2.01            | 0.456453              | 1.88             | 0.951819              | -1.04            |
| LOC102118731 | UDP-glucuronosyltransferase 2A1              | 5 5640 15789           | 0.087869              | 8.15             | 0.719964              | 2.83             | 0.898329              | -1.26            |
| LOC107130509 | Ig heavy chain V-III region 23-like          | 7 171692124 171692673  | 0.087869              | 2.52             | 0.000118              | 15.36            | 0.510514              | 1.55             |
| LOC102129186 | NKG2D ligand 4-like isoform X2               | 4 56111364 56122211    | 0.087869              | -4.21            | 0.919838              | 1.26             | 0.085382              | -6.90            |
| CXADR        | coxsackievirus and adenovirus receptor is    | 3 29683026 29767242    | 0.087960              | -1.76            | 0.320481              | 1.78             | 0.857760              | 1.09             |
| SLC38A8      | putative sodium-coupled neutral amino ac     | 20 72284859 72320587   | 0.088032              | 3.36             | 0.681163              | 1.71             | 0.701902              | -1.35            |
| SPDEF        | SAM pointed domain-containing Ets trans      | 4 136247942 136254186  | 0.088046              | 1.80             | 0.925048              | -1.09            | 0.071591              | 1.94             |
| TMEM57       | macoilin isoform X1                          | 1 202908732 202977215  | 0.088135              | 1.14             | 0.681824              | 1.07             | 0.727742              | 1.04             |
| LYRM7        | complex III assembly factor LYRM7 isof       | 6 130171965 130197469  | 0.088276              | -1.42            | 0.199469              | 1.54             | 0.332478              | 1.27             |
| DAAM2        | disheveled-associated activator of morpho    | 4 130808407 130853796  | 0.088314              | 1.45             | 0.885680              | 1.08             | 0.771011              | -1.09            |
| MASP1        | mannan-binding lectin serine protease 1 is   | 2 10176750 10248825    | 0.088598              | 2.65             | 0.905466              | -1.19            | 0.448740              | -1.67            |
| IGSF6        | immunoglobulin superfamily, member 6 p       | 20 21343335 21355970   | 0.088650              | -1.87            | 0.351804              | -1.83            | 0.697564              | -1.21            |
| MAMSTR       | MEF2-activating motif and SAP domain-c       | 19 49542273 49548095   | 0.088712              | 1.79             | 0.754274              | 1.28             | 0.881848              | -1.07            |
| EXOC8        | exocyst complex component 8                  | 1 18219770 18221947    | 0.088712              | -1.44            | 0.178718              | 1.61             | 0.533254              | 1.18             |
| GRM5         | metabotropic glutamate receptor 5 isoform    | 14 83954644 84512306   | 0.088848              | 1.25             | 0.405956              | -1.22            | 0.361389              | -1.15            |
| LOC102121309 |                                              | 8 48988080 48996247    | 0.088858              | 2.52             | 0.575632              | -1.78            | 0.253916              | -2.05            |
| UROS         | uroporphyrinogen-III synthase isoform X9     | 9 125106216 125141784  | 0.088858              | 1.17             | 0.191592              | -1.22            | 0.817924              | 1.03             |
| PRDM2        | PR domain zinc finger protein 2 isoform X    | 1 214731592 214836149  | 0.088906              | 1.15             | 0.286114              | 1.16             | 0.779212              | 1.03             |
| PRMT6        | protein arginine N-methyltransferase 6       | 1 119857121 119858248  | 0.088930              | -1.26            | 0.890814              | 1.05             | 0.736763              | 1.06             |
| BOLA2B       | bola-like protein 2                          | 20 28696954 28697786   | 0.088976              | -1.35            | 0.250488              | -1.41            | 0.408749              | -1.19            |
| ATP8         | ATP synthase F0 subunit 8                    | MT 8364 8570           | 0.089045              | -1.38            | 0.792894              | -1.12            | 0.642964              | 1.12             |
| SLC35B3      | adenosine 3'-phospho 5'-phosphosulfate tr    | 4 162495811 162518863  | 0.089100              | -1.23            | 0.739856              | 1.09             | 0.437478              | 1.12             |
| NOP14        | nucleolar protein 14 isoform X2              | 5 3023835 3051152      | 0.089186              | 1.24             | 0.276011              | -1.27            | 0.829577              | -1.04            |
| MAP3K3       | mitogen-activated protein kinase kinase ki   | 16 60913047 60985026   | 0.089524              | 1.18             | 0.811777              | 1.06             | 0.962277              | -1.01            |
| ADNP         | activity-dependent neuroprotector homeo      | 10 82728235 82740591   | 0.089524              | 1.10             | 0.114512              | 1.16             | 0.994098              | 1.00             |
| LOC102120540 | T-cell receptor alpha chain V region 2B4-    | 7 85543473 85544091    | 0.089692              | 2.30             | 0.474399              | 1.79             | 0.149652              | 1.95             |
| LOC102116188 | uncharacterized protein LOC102116188 i       | 1 184867373 184900961  | 0.089790              | 2.04             | 0.993973              | -1.01            | 0.530344              | -1.37            |
| LOC101866504 | myomegalin isoform X2                        | 1 106299639 106515553  | 0.089862              | -1.38            | 0.529060              | -1.26            | 0.886663              | 1.04             |
| STEAP2       | metalloreductase STEAP2 isoform X3           | 3 121739621 121754970  | 0.089976              | -1.59            | 0.575791              | 1.35             | 0.842485              | 1.08             |
| LOC102129039 |                                              | 3 156823 169875        | 0.089976              | -1.75            | 0.906641              | -1.10            | 0.326591              | -1.47            |
| PROSER3      | proline and serine-rich protein 3 isoform X  | 19 36208714 36219091   | 0.090001              | 1.44             | 0.053753              | -1.88            | 0.228560              | -1.36            |
| SMPD5        | sphingomyelin phosphodiesterase 3 isofor     | 8 145685150 145686398  | 0.090001              | -2.22            | 0.887333              | 1.19             | 0.963130              | 1.04             |
| DZANK1       | double zinc ribbon and ankyrin repeat-cor    | 10 43792166 43891191   | 0.090209              | 1.45             | 0.791694              | -1.14            | 0.426032              | -1.23            |
| SCP2         | non-specific lipid-transfer protein isoform  | 1 174384596 174516167  | 0.090209              | -1.16            | 0.778065              | 1.06             | 0.565439              | 1.07             |
| TC2N         | tandem C2 domains nuclear protein isofor     | 7 156750936 156785532  | 0.090209              | -1.21            | 0.746254              | 1.08             | 0.534846              | -1.09            |
| METTL12      | methyltransferase-like protein 12, mitoch    | 14 11602166 11603328   | 0.090209              | -1.31            | 0.469062              | -1.24            | 0.859642              | -1.04            |
| PGLYRP1      | peptidoglycan recognition protein 1 precu    | 10 5264 9060           | 0.090212              | 2.22             | 0.070565              | 3.69             | 0.752087              | -1.22            |
| CNIH2        | protein conichon homolog 2 isoform X1        | 14 8214311 8220022     | 0.090339              | 1.79             | 0.072148              | -2.63            | 0.856172              | 1.09             |
| IMPAD1       | inositol monophosphatase 3                   | 8 58031316 58061789    | 0.090339              | -1.28            | 0.027733              | 1.60             | 0.495554              | 1.13             |



| Gene symbol  | Gene name                                                     | chr_start_end          | Day3 adjusted P-value | Day3 fold change | Day5 adjusted P-value | Day5 fold change | Day7 adjusted P-value | Day7 fold change |
|--------------|---------------------------------------------------------------|------------------------|-----------------------|------------------|-----------------------|------------------|-----------------------|------------------|
| LOC102136128 | tumor necrosis factor receptor superfamily                    | 8 23419769 23452701    | 0.090426              | 1.82             | 0.891721              | -1.13            | 0.778888              | 1.14             |
| FAM200A      | protein FAM200A isoform X1                                    | 3 43815661 43817382    | 0.090426              | -1.28            | 0.281601              | 1.31             | 0.604891              | 1.10             |
| MZT2B        | mitotic-spindle organizing protein 2B isoform X1              | 12 1399885 1408246     | 0.090487              | -1.31            | 0.164669              | -1.43            | 0.481898              | -1.15            |
| LOC102119151 |                                                               | 16 28509831 28532837   | 0.090530              | 2.02             | 0.970990              | 1.05             | 0.604516              | -1.29            |
| ZNF684       | zinc finger protein 684                                       | 1 187175489 187187508  | 0.090530              | -1.44            | 0.382193              | 1.41             | 0.933506              | 1.03             |
| DDX24        | ATP-dependent RNA helicase DDX24                              | 7 159086912 159115178  | 0.090550              | 1.14             | 0.681923              | 1.07             | 0.876137              | -1.02            |
| BTBD1        | BTB/POZ domain-containing protein 1 isoform X1                | 7 62934298 62991071    | 0.090550              | -1.25            | 0.299150              | 1.26             | 0.543034              | 1.10             |
| PTGES3L      | putative protein PTGES3L                                      | 16 54736877 54745675   | 0.090838              | 2.04             | 0.743836              | 1.41             | 0.455999              | -1.48            |
| RASSF5       | ras association domain-containing protein 5                   | 1 65078592 65155671    | 0.090927              | 1.28             | 0.405148              | -1.24            | 0.410700              | 1.16             |
| SAFB         | scaffold attachment factor B1 isoform X1                      | 19 5753696 5798563     | 0.091007              | 1.13             | 0.963542              | 1.01             | 0.067785              | -1.16            |
| TMEM244      | transmembrane protein 244 isoform X1                          | 4 33963081 34005985    | 0.091036              | -2.87            | 0.959853              | -1.06            | 0.765996              | 1.18             |
| RASSF4       | ras association domain-containing protein 4                   | 9 43619548 43643032    | 0.091196              | -1.38            | 0.778065              | 1.13             | 0.896263              | -1.04            |
| KLF9         | uncharacterized protein LOC101865398                          | 15 81131091 81157702   | 0.091242              | 1.42             | 0.149066              | 1.62             | 0.985138              | 1.01             |
| CLSTN1       | calysteinin-1 isoform X1                                      | 1 218404691 218511325  | 0.091242              | 1.20             | 0.393943              | -1.18            | 0.672783              | -1.06            |
| SRSF9        | serine/arginine-rich splicing factor 9                        | 11 124366525 124375041 | 0.091242              | -1.12            | 0.352546              | -1.12            | 0.629393              | -1.04            |
| UTP18        | U3 small nucleolar RNA-associated protein 18                  | 16 36675910 36713381   | 0.091307              | -1.18            | 0.412982              | 1.16             | 0.380188              | 1.11             |
| GDPD1        | glycerophosphodiester phosphodiesterase 1                     | 16 44765879 44837396   | 0.091307              | -1.38            | 0.271539              | -1.46            | 0.602233              | -1.14            |
| BEST2        | bestrophin-2                                                  | 19 12974411 12981391   | 0.091421              | 7.29             | 0.850130              | 1.90             | 0.366641              | -4.23            |
| PLXNA2       | plexin-A2                                                     | 1 66595324 66786471    | 0.091507              | 1.37             | 0.724475              | 1.15             | 0.979917              | 1.01             |
| LOC102128376 | angiotensin-converting enzyme isoform X1                      | 16 60766360 60786886   | 0.091516              | 1.46             | 0.034920              | 2.01             | 0.577221              | 1.17             |
| TXNDC17      | thioredoxin domain-containing protein 17                      | 16 6665850 6667786     | 0.091518              | -1.52            | 0.360379              | -1.49            | 0.917055              | -1.04            |
| HP1BP3       | heterochromatin protein 1-binding protein 3                   | 1 207606815 207646042  | 0.091576              | 1.15             | 0.954012              | -1.01            | 0.205577              | 1.23             |
| THAP5        | THAP domain-containing protein 5                              | 3 141044924 141050284  | 0.091579              | -1.39            | 0.008569              | 2.03             | 0.255369              | 1.29             |
| CMTM3        | CKLF-like MARVEL transmembrane domain-containing protein 3    | 20 54716731 54743016   | 0.091897              | 1.16             | 0.315515              | -1.16            | 0.585309              | 1.06             |
| LOC102142492 | zinc finger protein 141                                       | 5 294740 320041        | 0.091979              | -1.39            | 0.961890              | 1.03             | 0.640607              | 1.12             |
| ATAD1        | ATPase family AAA domain-containing protein 1                 | 9 86308791 86366908    | 0.092238              | -1.26            | 0.264207              | 1.30             | 0.587006              | 1.10             |
| AHNAK2       | protein AHNAK2                                                | 7 170316371 170341994  | 0.092334              | -1.25            | 0.352149              | -1.24            | 0.000368              | -1.54            |
| CDC27        | cell division cycle protein 27 homolog isoform X1             | 16 58947536 59012204   | 0.092334              | -1.34            | 0.523964              | 1.23             | 0.297505              | 1.24             |
| FRMPD3       | FERM and PDZ domain-containing protein 3                      | X 104616123 104700615  | 0.092457              | 2.25             | 0.829957              | -1.27            | 0.706477              | 1.24             |
| TRNAU1AP     | tRNA selenocysteine 1-associated protein                      | 1 199572735 199602016  | 0.092457              | -1.22            | 0.982681              | 1.01             | 0.302006              | -1.15            |
| METT1L       | tRNA (guanine-N(7)-)-methyltransferase 1                      | 11 56766261 56769767   | 0.092457              | -1.38            | 0.778306              | -1.13            | 0.901636              | -1.04            |
| LOC102129235 |                                                               | 14 78160052 78165033   | 0.092457              | -2.55            | 0.149191              | 6.28             | 0.913658              | 1.09             |
| LOC107129521 |                                                               | 4 89873789 89875081    | 0.092457              | -2.82            | 0.973051              | 1.07             | 0.217201              | -2.53            |
| C15H9orf92   | putative uncharacterized protein C9orf92                      | 15 62495886 62544801   | 0.092767              | 3.88             | 0.927990              | 1.25             | 0.977183              | 1.03             |
| TNPO1        | transportin-1 isoform X1                                      | 6 70976082 71067768    | 0.092767              | -1.49            | 0.536527              | 1.32             | 0.301013              | 1.34             |
| CFAP70       | cilia- and flagella-associated protein 70 isoform X1          | 9 62187883 62298852    | 0.092814              | 1.80             | 0.193272              | -2.17            | 0.367261              | -1.46            |
| LOC102123296 | HMG domain-containing protein 3-like                          | 6 149347360 149347851  | 0.092849              | 1.83             | 0.896708              | 1.14             | 0.821796              | 1.11             |
| ANGEL2       | protein angel homolog 2 isoform X1                            | 1 71571596 71592582    | 0.093019              | -1.27            | 0.484811              | 1.20             | 0.402437              | 1.15             |
| BCL6         | B-cell lymphoma 6 protein                                     | 2 9728274 9739185      | 0.093024              | 1.33             | 0.913007              | -1.05            | 0.834287              | -1.05            |
| DDX47        | probable ATP-dependent RNA helicase DDX47                     | 11 13402778 13418960   | 0.093024              | -1.18            | 0.096226              | 1.30             | 0.589160              | -1.07            |
| PRSS12       | neurotrypsin                                                  | 5 117705610 117778083  | 0.093172              | 1.38             | 0.521928              | 1.26             | 0.008278              | 1.64             |
| MITF         | microphthalmia-associated transcription factor 1              | 2 125386431 125607007  | 0.093200              | -1.30            | 0.709251              | -1.13            | 0.488596              | 1.14             |
| CLDN14       | claudin-14                                                    | 3 10301630 10302349    | 0.093241              | 5.87             | 0.351333              | 4.69             | 0.980274              | -1.02            |
| POU2AF1      | POU domain class 2-associating factor 1                       | 14 107320447 107345412 | 0.093285              | 2.20             | 0.856078              | -1.23            | 0.614058              | 1.34             |
| GPR35        | G-protein coupled receptor 35                                 | 12 130500294 130501223 | 0.093285              | 1.83             | 0.556766              | -1.50            | 0.692029              | 1.20             |
| KIF13B       | kinesin-like protein KIF13B isoform X3                        | 8 29542608 29733472    | 0.093285              | 1.16             | 0.146364              | 1.22             | 0.521915              | -1.07            |
| RAD9B        | cell cycle checkpoint control protein RAD9B                   | 11 114111928 114148626 | 0.093285              | -1.45            | 0.905393              | -1.07            | 0.708024              | 1.12             |
| LRRC15       | leucine-rich repeat-containing protein 15                     | 2 3168917 3170662      | 0.093285              | -4.14            | 0.777448              | 1.72             | 0.011443              | 8.45             |
| MRPL43       | 39S ribosomal protein L43, mitochondria                       | 9 99934246 99935090    | 0.093326              | -1.20            | 0.621147              | -1.11            | 0.628197              | -1.07            |
| LACE1        | lactation elevated protein 1 isoform X1                       | 4 12215217 12437860    | 0.093394              | -1.22            | 0.914011              | 1.04             | 0.859666              | -1.03            |
| SPATC1       | speriolin                                                     | 8 145676845 145683006  | 0.093394              | -2.52            | 0.309251              | -2.83            | 0.745951              | -1.27            |
| DDIT4        | uncharacterized protein LOC101866790                          | 9 63365250 63366224    | 0.093408              | 1.28             | 0.742766              | 1.11             | 0.245316              | 1.22             |
| MFS14A       | hippocampus abundant transcript 1 protein                     | 1 126762722 126809022  | 0.093408              | -1.26            | 0.359843              | 1.25             | 0.234313              | 1.21             |
| FASTKD2      | FAST kinase domain-containing protein 2                       | 12 96369481 96392132   | 0.093408              | -1.30            | 0.589490              | 1.18             | 0.825475              | 1.05             |
| SCARF1       | scavenger receptor class F member 1 isoform X1                | 16 1526868 1537302     | 0.093506              | 1.25             | 0.923566              | 1.04             | 0.993285              | 1.00             |
| EP400        | E1A-binding protein p400 isoform X1                           | 11 136464740 136600848 | 0.093506              | 1.09             | 0.983197              | -1.00            | 0.885455              | 1.01             |
| CCND2        | G1/S-specific cyclin-D2                                       | 11 4452344 4481049     | 0.093547              | 1.20             | 0.575815              | 1.13             | 0.956353              | -1.01            |
| YLPM1        | YLP motif-containing protein 1 isoform X1                     | 7 139449269 139523234  | 0.093595              | 1.18             | 0.972293              | -1.01            | 0.541398              | 1.08             |
| SIK1         | serine/threonine-protein kinase SIK1 isoform X1               | 3 3359103 3368658      | 0.093612              | 1.42             | 0.225875              | 1.53             | 0.401971              | -1.23            |
| XKR9         | XK-related protein 9 isoform X1                               | 8 71914637 71961703    | 0.093694              | -1.76            | 0.906846              | 1.11             | 0.601878              | 1.25             |
| RASAL1       | rasGAP-activating-like protein 1 isoform X1                   | 11 116820962 116856596 | 0.093771              | 1.75             | 0.922796              | 1.09             | 0.997204              | 1.00             |
| CCDC96       | coiled-coil domain-containing protein 96                      | 5 5908514 5910193      | 0.093771              | 1.71             | 0.305250              | 1.92             | 0.513172              | -1.31            |
| SCGB1A1      | uteroglobin                                                   | 14 11865214 11868043   | 0.094031              | 4.25             | 0.673330              | 2.13             | 0.215425              | -3.46            |
| LOC102129152 |                                                               | 18 32060421 32145491   | 0.094031              | -3.20            | 0.281258              | 5.16             | 0.921540              | -1.08            |
| RAB5B        | uncharacterized protein LOC101865961                          | 11 54895643 54901946   | 0.094042              | 1.33             | 0.898110              | -1.06            | 0.673937              | 1.10             |
| DNAH5        | dynein heavy chain 5, axonemal                                | 6 14095296 14336228    | 0.094049              | 4.13             | 0.992376              | -1.02            | 0.565129              | -1.85            |
| TAF13        | uncharacterized protein LOC101867317                          | 1 117682524 117694347  | 0.094049              | -1.29            | 0.806337              | -1.09            | 0.297098              | 1.20             |
| IGSF1        | immunoglobulin superfamily member 1 isoform X1                | X 128152380 128165307  | 0.094125              | 1.82             | 0.581545              | 1.48             | 0.660853              | -1.21            |
| OAZ1         | ornithine decarboxylase antizyme 1                            | 19 2141274 2144657     | 0.094266              | -1.24            | 0.645720              | -1.13            | 0.373650              | -1.14            |
| LOC102129964 | heparan-alpha-glucosaminide N-acetyltransferase 1             | 0 8333 52927           | 0.094481              | 1.39             | 0.910043              | 1.06             | 0.413868              | 1.21             |
| FRAS1        | extracellular matrix protein FRAS1 isoform X1                 | 5 55984490 56430831    | 0.094545              | 1.51             | 0.382077              | -1.45            | 0.446146              | -1.25            |
| SCAF1        | splicing factor, arginine/serine-rich 19                      | 19 50500511 50513844   | 0.094545              | 1.17             | 0.979469              | -1.01            | 0.986122              | -1.00            |
| STXBP5       | syntaxin-binding protein 5 isoform X1                         | 4 53077411 53264960    | 0.094545              | -1.25            | 0.579596              | 1.15             | 0.545283              | 1.11             |
| GPIHBP1      | glycosylphosphatidylinositol-anchored histidine phosphatase 1 | 8 144822901 144825220  | 0.094730              | 2.45             | 0.000036              | 20.80            | 0.657542              | -1.43            |
| PURB         | transcriptional activator protein Pur-beta                    | 3 75618847 75619557    | 0.094730              | -1.24            | 0.068590              | 1.43             | 0.891968              | 1.03             |
| RAD51B       | DNA repair protein RAD51 homolog 2 isoform X1                 | 7 132354003 133014740  | 0.094733              | -1.31            | 0.424237              | -1.26            | 0.110748              | -1.33            |
| LOC107129606 |                                                               | 4 144385086 144400212  | 0.095031              | -1.55            | 0.939680              | -1.05            | 0.864159              | -1.06            |
| EXOC3L4      | exocyst complex component 3-like protein 4                    | 7 168378419 168399716  | 0.095095              | 1.86             | 0.529012              | 1.57             | 0.686200              | 1.22             |
| LIMK2        | LIM domain kinase 2 isoform X1                                | 10 20125326 20192457   | 0.095095              | 1.23             | 0.674941              | -1.12            | 0.873017              | -1.03            |
| LOC107128675 | LOW QUALITY PROTEIN; putative zinc finger protein             | 0 42999 46744          | 0.095095              | -1.26            | 0.054813              | 1.51             | 0.176021              | -1.24            |
| C1H1orf226   | uncharacterized protein C1orf226 homolog 1                    | 1 89347821 89375425    | 0.095126              | 1.48             | 0.414334              | -1.39            | 0.867228              | -1.05            |
| TMEM107      | transmembrane protein 107 isoform X4                          | 16 8298827 8300877     | 0.095133              | -1.22            | 0.373952              | -1.21            | 0.074909              | -1.26            |
| LOC107129323 | T-cell receptor beta chain V region LB2-like 1                | 3 175787614 175788181  | 0.095149              | 2.00             | 0.613163              | -1.49            | 0.699682              | -1.19            |
| HEATR9       | protein HEATR9                                                | 16 32225882 32241476   | 0.095149              | 1.85             | 0.343941              | -1.91            | 0.547372              | -1.33            |
| CCDC181      | coiled-coil domain-containing protein 181                     | 1 27347873 27379086    | 0.095149              | 1.45             | 0.975123              | 1.02             | 0.672550              | -1.13            |
| C13H2orf42   | uncharacterized protein C2orf42 homolog 1                     | 13 39725504 39753063   | 0.095149              | 1.39             | 0.550383              | -1.25            | 0.306090              | 1.27             |
| LOC102145632 | zinc finger protein 761                                       | 19 54221593 54234290   | 0.095149              | 1.29             | 0.879449              | 1.06             | 0.730034              | 1.07             |

| Gene symbol  | Gene name                                                         | chr_start_end          | Day3 adjusted P-value | Day3 fold change | Day5 adjusted P-value | Day5 fold change | Day7 adjusted P-value | Day7 fold change |
|--------------|-------------------------------------------------------------------|------------------------|-----------------------|------------------|-----------------------|------------------|-----------------------|------------------|
| GLMN         | glomulin isoform X1                                               | 1 134681765 134740243  | 0.095149              | -1.40            | 0.735662              | 1.16             | 0.716089              | 1.10             |
| LOC102116978 | galactoside-binding soluble lectin 13                             | 19 40070958 40075823   | 0.095217              | 2.79             | 0.774694              | 1.50             | 0.659545              | -1.43            |
| LOC102135442 | tyrosine-protein kinase ZAP-70 isoform X1                         | 13 1861922 1875946     | 0.095217              | 1.34             | 0.039849              | -1.71            | 0.427999              | 1.18             |
| RCSL1        | capZ-interacting protein isoform X1                               | 1 25596199 25671074    | 0.095217              | 1.22             | 0.608322              | -1.13            | 0.583858              | 1.09             |
| LOC102118651 |                                                                   | 8 102498278 102529598  | 0.095246              | 2.09             | 0.830080              | -1.25            | 0.542628              | 1.40             |
| RPE          | ribose-phosphate 3-epimerase isoform X1                           | 12 99493929 99510792   | 0.095246              | -1.33            | 0.269302              | 1.38             | 0.222323              | 1.27             |
| MYBPC1       | myosin-binding protein C, slow-type isoform X1                    | 11 105337650 105436424 | 0.095387              | 11.29            | 0.415897              | 10.32            | 0.654169              | 2.36             |
| LOC102147318 |                                                                   | 14 161806 166624       | 0.095387              | 2.14             | 0.635513              | 1.76             | 0.789492              | -1.22            |
| DRD2         | D(2) dopamine receptor                                            | 14 109410651 109424822 | 0.095476              | 2.82             | 0.589490              | 1.92             | 0.498446              | 1.63             |
| XRCC4        | X-ray repair complementing defective replication 4                | 6 81376877 81640420    | 0.095476              | -1.35            | 0.874086              | 1.07             | 0.920994              | -1.03            |
| FBXO36       |                                                                   | 12 119802434 119821706 | 0.095772              | 1.36             | 0.230680              | 1.49             | 0.353176              | 1.23             |
| FAM91A1      | protein FAM91A1 isoform X1                                        | 8 125114760 125160905  | 0.095772              | -1.35            | 0.474399              | 1.27             | 0.258108              | 1.27             |
| CER1         | cerberus                                                          | 15 64045032 64047611   | 0.095789              | 5.83             | 1.000000              | 11.91            | 0.589566              | 2.01             |
| SLC25A23     | calcium-binding mitochondrial carrier protein 23                  | 19 6613036 6645405     | 0.095790              | 1.44             | 0.671579              | -1.21            | 0.525053              | -1.19            |
| C12H2orf72   | uncharacterized protein C2orf72 homolog                           | 12 120845520 120854767 | 0.095859              | 8.98             | 1.000000              | 1.74             | 1.000000              | -1.14            |
| PACSIN1      | protein kinase C and casein kinase substrate-associated protein 1 | 4 136260413 136267232  | 0.095859              | 2.03             | 0.105667              | -3.07            | 0.587495              | 1.34             |
| EYA1         | eyes absent homolog 1 isoform X4                                  | 8 72392645 72716249    | 0.095859              | 1.98             | 0.516100              | -1.63            | 0.756724              | -1.18            |
| HPSE2        | inactive heparanase-2                                             | 9 97291431 98087271    | 0.095859              | 1.76             | 0.030466              | 2.95             | 0.694970              | -1.19            |
| TSPAN18      | tetraspanin-18 isoform X1                                         | 14 22661090 22691656   | 0.095859              | 1.35             | 0.924645              | -1.05            | 0.549924              | 1.15             |
| CHCHD4       | mitochondrial intermembrane space import and export protein 4     | 11 86108529 86121728   | 0.095859              | -1.22            | 0.866264              | -1.05            | 0.537439              | -1.10            |
| CCNL1        | cyclin-L1 isoform X2                                              | 2 59530320 59542188    | 0.095859              | -1.31            | 0.859712              | 1.07             | 0.295978              | -1.22            |
| RENBP        | N-acylglucosamine 2-epimerase isoform X1                          | X 150926630 150936099  | 0.095859              | -1.34            | 0.230660              | -1.43            | 0.217201              | -1.29            |
| CBLL1        | E3 ubiquitin-protein ligase Hakai isoform X1                      | 3 140226027 140240422  | 0.095859              | -1.37            | 0.352169              | 1.37             | 0.403924              | 1.21             |
| FBXL17       | F-box/LRR-repeat protein 17                                       | 6 106592018 107144799  | 0.095859              | -1.42            | 0.283045              | 1.47             | 0.476280              | 1.20             |
| CTSH         | pro-cathepsin H                                                   | 7 57384077 57404798    | 0.095981              | -1.35            | 0.284331              | -1.39            | 0.117801              | -1.36            |
| PKN2         | serine/threonine-protein kinase N2 isoform X1                     | 1 138439983 138602687  | 0.096033              | -1.41            | 0.268391              | 1.48             | 0.230057              | 1.33             |
| SMAD3        | mothers against decapentaplegic homolog 3                         | 7 44711142 44838444    | 0.096115              | 1.18             | 0.944531              | -1.02            | 0.579219              | 1.07             |
| E1F4A3       | eukaryotic initiation factor 4A-III                               | 16 77688148 77702773   | 0.096166              | 1.13             | 0.771069              | -1.05            | 0.939484              | -1.01            |
| PTRH2        | peptidyl-tRNA hydrolase 2, mitochondrial                          | 16 45256071 45265358   | 0.096166              | -1.35            | 0.928719              | 1.04             | 0.584227              | -1.13            |
| UBLCP1       | ubiquitin-like domain-containing CTD phosphatase 1                | 6 158720838 158736274  | 0.096206              | -1.47            | 0.328383              | 1.49             | 0.139423              | 1.47             |
| PSMA4        | proteasome subunit alpha type-4                                   | 7 56883303 56890456    | 0.096245              | -1.19            | 0.568505              | -1.12            | 0.680740              | 1.06             |
| HNRNPA2B1    | heterogeneous nuclear ribonucleoproteins A2/B1                    | 3 94577515 94585610    | 0.096258              | -1.17            | 0.795515              | 1.06             | 0.806824              | 1.03             |
| LOC102115743 | T-cell receptor beta chain V region CTL-1                         | 3 175394872 175395353  | 0.096329              | 2.39             | 0.518077              | 1.56             | 0.742345              | 1.25             |
| ING3         | inhibitor of growth protein 3 isoform X1                          | 3 153724845 153752411  | 0.096349              | -1.22            | 0.194824              | 1.30             | 0.454563              | 1.12             |
| NUMB         | protein numb homolog isoform X4                                   | 7 137967698 138048913  | 0.096435              | 1.17             | 0.070565              | 1.31             | 0.978231              | 1.00             |
| RANBP6       | ran-binding protein 6 isoform X1                                  | 15 72996292 72999609   | 0.096435              | -1.38            | 0.551212              | 1.25             | 0.568664              | 1.15             |
| TRAPPC2      | trafficking protein particle complex subunit 2                    | X 11474386 11479921    | 0.096528              | -1.22            | 0.147519              | 1.32             | 0.364968              | 1.14             |
| PUS10        | putative tRNA pseudouridine synthase PUS10                        | 13 49098405 49179539   | 0.096528              | -1.37            | 0.847318              | 1.09             | 0.625004              | -1.12            |
| PCDH15       | protocadherin-15 isoform X1                                       | 9 81524059 82404252    | 0.096536              | 2.29             | 0.594451              | 1.68             | 0.730623              | -1.25            |
| LALNT9       | polypeptide N-acetylglucosaminyltransferase 9                     | 11 136748966 136860905 | 0.096576              | 1.74             | 0.052232              | -2.79            | 0.000277              | 3.67             |
| LRRN1        | leucine-rich repeat neuronal protein 1                            | 2 134735723 134737873  | 0.096576              | 1.69             | 0.933568              | -1.07            | 0.174294              | 1.61             |
| CNTN3        | contactin-3                                                       | 2 129924812 130174012  | 0.096716              | 1.65             | 0.733772              | -1.23            | 0.330730              | 1.40             |
| TRPS1        | zinc finger transcription factor Trps1 isoform X1                 | 8 116646403 116902720  | 0.096734              | -1.37            | 0.858257              | 1.09             | 0.261264              | 1.28             |
| LOC102140594 | NADH dehydrogenase [ubiquinone] iron-sulfur domain subunit 1      | 2 98810767 98811399    | 0.096758              | -1.28            | 0.946496              | -1.03            | 0.099470              | -1.31            |
| DTNB         | dystrobrevin beta isoform X8                                      | 13 85274006 85523037   | 0.096758              | -1.33            | 0.513177              | -1.24            | 0.370553              | -1.20            |
| LOC107130565 | LOW QUALITY PROTEIN: endogenous                                   | 1 90109228 90111227    | 0.096765              | -3.52            | 0.716288              | -1.77            | 0.763640              | -1.30            |
| PGM1         | phosphoglucomutase-1                                              | 1 163755318 163820538  | 0.096776              | -1.29            | 0.386219              | -1.26            | 0.722259              | -1.07            |
| NEK5         | serine/threonine-protein kinase Nek5 isoform X1                   | 17 31315781 31389356   | 0.096804              | 1.99             | 0.061996              | 4.44             | 0.498623              | 1.52             |
| CDC42EP3     | cdc42 effector protein 3 isoform X1                               | 13 73024361 73025125   | 0.096831              | 1.22             | 0.157309              | 1.32             | 0.187414              | 1.20             |
| LOC107129320 | T-cell receptor beta chain V region PHDS3                         | 3 175880709 175881328  | 0.096834              | 2.11             | 0.898232              | -1.17            | 0.083354              | 2.19             |
| FZD1         | frizzled-1                                                        | 3 120727253 120729208  | 0.097144              | 1.35             | 0.315574              | 1.37             | 0.238654              | 1.28             |
| FBXO41       | F-box only protein 41                                             | 13 36581041 36594207   | 0.097164              | 1.62             | 0.289491              | -1.64            | 0.613472              | 1.19             |
| BTBD10       | BTB/POZ domain-containing protein 10 isoform X1                   | 14 54272861 54323378   | 0.097176              | -1.21            | 0.434068              | 1.18             | 0.426156              | 1.12             |
| PLA2G2C      | putative inactive group IIC secretory phospholipase A2 group 2C   | 1 208240156 208254620  | 0.097181              | 3.86             | 0.751819              | 1.87             | 0.413109              | -2.08            |
| GOLT1A       | vesicle transport protein GOT1A isoform X1                        | 1 62675583 62692090    | 0.097257              | -1.63            | 0.550531              | -1.38            | 0.295978              | -1.41            |
| ABCC6        | multidrug resistance-associated protein 6 isoform X1              | 20 16205372 16272233   | 0.097281              | 2.65             | 0.139308              | 6.26             | 0.727472              | -1.28            |
| EPSL1        | epidermal growth factor receptor kinase subunit 1                 | 19 55880418 55891507   | 0.097286              | 1.55             | 0.564257              | 1.34             | 0.079288              | -1.66            |
| SLC29A1      | equilibrative nucleoside transporter 1 isoform X1                 | 4 126290255 126304607  | 0.097358              | 1.19             | 0.864904              | 1.05             | 0.434450              | -1.10            |
| STOM         | erythrocyte band 7 integral membrane protein                      | 15 15925250 15956658   | 0.097427              | -1.27            | 0.677313              | -1.13            | 0.270009              | 1.20             |
| LOC102130328 | uncharacterized protein LOC102130328                              | 10 82085925 82089062   | 0.097427              | -1.54            | 0.969025              | 1.03             | 0.452138              | -1.27            |
| ECM1         | extracellular matrix protein 1                                    | 1 101559529 101564790  | 0.097427              | -1.68            | 0.296898              | -1.76            | 0.699682              | -1.17            |
| PPP2CB       | serine/threonine-protein phosphatase 2A catalytic subunit         | 8 31377260 31404543    | 0.097447              | -1.26            | 0.173609              | 1.36             | 0.693697              | 1.07             |
| LOC107127086 |                                                                   | 13 22731567 22746292   | 0.097578              | 2.04             | 0.045442              | 4.27             | 0.719167              | 1.24             |
| CYSLTR1      | cysteinyl leukotriene receptor 1                                  | X 75194919 75195932    | 0.097656              | 1.49             | 0.112633              | 1.83             | 0.618523              | 1.16             |
| LOC102127258 | histamine N-methyltransferase                                     | 12 26317706 26366975   | 0.097656              | -1.33            | 0.489195              | 1.24             | 0.774221              | 1.07             |
| SGCB         | beta-sarcoglycan                                                  | 5 82483746 82492879    | 0.097810              | 1.33             | 0.046929              | 1.68             | 0.442388              | 1.18             |
| LOC102122845 | LOW QUALITY PROTEIN: butyrophilin                                 | 9 17797864 17799468    | 0.097819              | -4.41            | 0.934916              | 1.19             | 0.827501              | -1.24            |
| CEP78        | centrosomal protein of 78 kDa isoform X1                          | 15 88956411 88991520   | 0.097827              | -1.24            | 0.264771              | -1.27            | 0.691570              | 1.07             |
| RTN4         | reticulon-4 isoform X1                                            | 13 55010976 55089716   | 0.097872              | -1.31            | 0.722419              | 1.13             | 0.272346              | 1.23             |
| LOC107131026 | Ig lambda chain V-II region MGC-like                              | 10 28649104 28649725   | 0.097873              | 2.26             | 0.937104              | 1.11             | 0.477123              | -1.52            |
| MCPH1        | microcephalin isoform X1                                          | 8 6621606 6859798      | 0.097873              | 1.24             | 0.219202              | 1.30             | 0.133941              | -1.24            |
| DDX54        | ATP-dependent RNA helicase DDX54 isoform X1                       | 11 116878652 116905536 | 0.097873              | 1.55             | 0.232372              | -1.18            | 0.873547              | -1.02            |
| TCF23        | transcription factor 23 isoform X2                                | 13 83716213 83719931   | 0.097897              | 3.57             | 0.169762              | 6.56             | 0.762695              | -1.35            |
| LRRIQ3       | leucine-rich repeat and IQ domain-containing protein 3            | 1 153084203 153238670  | 0.097913              | -1.58            | 0.763245              | 1.20             | 0.851787              | 1.07             |
| SEC14L5      | SEC14-like protein 5                                              | 20 5254808 5313060     | 0.097940              | 1.93             | 0.014941              | 5.90             | 0.192389              | -1.84            |
| CST5         | cystatin-D                                                        | 10 38435954 38439607   | 0.097940              | -2.21            | 0.410217              | -1.69            | 0.009369              | -2.58            |
| TTC24        | tetratricopeptide repeat protein 24 isoform X1                    | 1 95127723 95133162    | 0.097942              | 1.50             | 0.014408              | -2.42            | 0.895476              | -1.05            |
| LOC102121517 | uncharacterized protein LOC102121517 isoform X1                   | 0 42 707               | 0.097942              | -1.47            | 0.973196              | -1.02            | 0.965116              | 1.02             |
| FZD8         | frizzled-8                                                        | 9 36303744 36306479    | 0.097942              | 1.30             | 0.207187              | 1.39             | 0.456860              | 1.15             |
| TRIM41       | E3 ubiquitin-protein ligase TRIM41 isoform X1                     | 6 181284556 181298251  | 0.097942              | 1.17             | 0.474410              | -1.13            | 0.837388              | -1.03            |
| TRPT1        | tRNA 2'-phosphotransferase 1 isoform X1                           | 14 10326536 10328657   | 0.097957              | 1.52             | 0.003177              | -2.80            | 0.707769              | 1.13             |
| LOC102122537 | coiled-coil domain-containing protein 88E                         | 0 5480 10365           | 0.097957              | 1.33             | 0.951768              | 1.03             | 0.825602              | 1.05             |
| LOC102129879 |                                                                   | 1 152470484 152477732  | 0.097957              | -2.37            | 0.288399              | 2.61             | 0.720441              | -1.30            |
| LOC101925630 |                                                                   | 19 53054683 53102907   | 0.098060              | 1.20             | 0.234771              | 1.24             | 0.795686              | 1.04             |
| LOC102132452 | cholesterol 7-alpha-monooxygenase                                 | 8 59605615 59614264    | 0.098172              | -1.52            | 0.015991              | 2.39             | 0.746312              | 1.12             |
| PEX13        | peroxisome biogenesis factor 13                                   | 13 49060534 49094066   | 0.098194              | -1.24            | 0.879644              | 1.05             | 0.723407              | 1.06             |
| FAM46C       | protein FAM46C isoform X1                                         | 1 109118926 109135904  | 0.098216              | 1.53             | 0.881958              | -1.10            | 0.518952              | 1.22             |

| Gene symbol  | Gene name                                                     | chr_start_end          | Day3 adjusted P-value | Day3 fold change | Day5 adjusted P-value | Day5 fold change | Day7 adjusted P-value | Day7 fold change |
|--------------|---------------------------------------------------------------|------------------------|-----------------------|------------------|-----------------------|------------------|-----------------------|------------------|
| SYTL2        | synaptotagmin-like protein 2 isoform X16                      | 14 81265853 81329031   | 0.098216              | 1.25             | 0.130360              | -1.37            | 0.624738              | 1.09             |
| PLEKHM3      | pleckstrin homology domain-containing family class 3 member 3 | 12 97458581 97604017   | 0.098305              | 1.25             | 0.944153              | 1.03             | 0.640140              | 1.09             |
| SLC9A3R1     | Na(+)/H(+) exchange regulatory cofactor                       | 16 71995327 72014270   | 0.098305              | 1.20             | 0.099046              | -1.32            | 0.505648              | -1.09            |
| MIOS         | WD repeat-containing protein mio isoform 1                    | 3 113478316 113510112  | 0.098359              | -1.24            | 0.492464              | -1.18            | 0.819819              | 1.04             |
| LOC102178013 |                                                               | 17 71287583 71313229   | 0.098359              | -3.33            | 0.876264              | -1.38            | 0.837933              | -1.21            |
| ZKSCAN1      | zinc finger protein with KRAB and SCAN domain                 | 3 44373357 44385509    | 0.098563              | 1.30             | 0.900320              | -1.05            | 0.140176              | 1.30             |
| CAPZA2       | F-actin-capping protein subunit alpha-2                       | 3 149367884 149422685  | 0.098563              | -1.46            | 0.283412              | 1.52             | 0.578268              | 1.17             |
| AMOT         | angiominin isoform X1                                         | X 109852126 109897607  | 0.098687              | 1.25             | 0.551171              | -1.17            | 0.922723              | -1.02            |
| AMZ2         | archaemycin-2 isoform X1                                      | 16 65404937 65412850   | 0.098695              | 1.11             | 0.058322              | -1.20            | 0.360228              | -1.07            |
| LOC102122289 | uncharacterized protein LOC102122289                          | 20 72974313 72976272   | 0.098757              | 1.18             | 0.778099              | -1.06            | 0.437127              | 1.10             |
| GATA1        | erythroid transcription factor                                | X 47325234 47328271    | 0.098786              | 2.38             | 0.332591              | 2.34             | 0.777670              | -1.20            |
| LOC102136130 | uncharacterized serine/threonine-protein kinase               | 16 24849556 24853355   | 0.098811              | -1.48            | 0.855754              | 1.11             | 0.602992              | 1.17             |
| LOC102126815 |                                                               | 7 158951627 158958173  | 0.098903              | 3.01             | 0.300820              | 3.99             | 0.232214              | -3.28            |
| ARMC9        | lisH domain-containing protein ARMC9 isoform 1                | 12 121023627 121201503 | 0.098903              | 1.24             | 0.207596              | -1.31            | 0.405131              | -1.14            |
| TBC1D7       | TBC1 domain family member 7                                   | 4 157485846 157507397  | 0.098903              | -1.24            | 0.676324              | -1.12            | 0.972620              | 1.01             |
| KRBA1        | protein KRBA1 isoform X6                                      | 3 182763397 182782358  | 0.098903              | -1.34            | 0.094146              | -1.58            | 0.307274              | -1.24            |
| RAP2A        | ras-related protein Rap-2a                                    | 17 80073419 80123490   | 0.098903              | -1.56            | 0.284323              | 1.64             | 0.471239              | 1.27             |
| SH2D5        | SH2 domain-containing protein 5 isoform 1                     | 1 207662961 207669919  | 0.098903              | -2.73            | 0.935150              | 1.15             | 0.167979              | -2.64            |
| PSD2         | PH and SEC7 domain-containing protein                         | 6 138939240 138972973  | 0.098908              | -2.33            | 0.185180              | -2.29            | 0.970768              | 1.02             |
| MAF          | transcription factor Maf                                      | 20 67869699 67877388   | 0.098940              | -1.51            | 0.511202              | 1.36             | 0.474235              | 1.24             |
| XPO6         | exportin-6 isoform X2                                         | 20 27034748 27151213   | 0.099071              | 1.16             | 0.866557              | 1.04             | 0.624396              | 1.06             |
| CIART        | circadian-associated transcriptional repressor                | 1 101795634 101799661  | 0.099134              | 1.78             | 0.896775              | -1.12            | 0.484870              | -1.34            |
| ACTR10       | actin-related protein 10 isoform X1                           | 7 122471766 122512098  | 0.099624              | -1.12            | 0.023982              | 1.25             | 0.731193              | 1.03             |
| FGD1         | FYVE, RhoGEF and PH domain-containing protein 1               | X 53553682 53606051    | 0.099633              | 1.29             | 0.371135              | -1.27            | 0.762449              | -1.06            |
| TTC4         | tetratricopeptide repeat protein 4 isoform 1                  | 1 172665742 172694100  | 0.099633              | -1.22            | 0.691084              | -1.10            | 0.381179              | -1.13            |
| UTP11L       | probable U3 small nucleolar RNA-associated protein 1          | 1 189797740 189812819  | 0.099633              | -1.26            | 0.906596              | 1.04             | 0.650678              | 1.08             |
| TMCC2        | transmembrane and coiled-coil domains protein 2               | 1 63734619 63777506    | 0.099671              | 1.40             | 0.929420              | -1.05            | 0.660853              | -1.12            |
| MOSPDI       | motile sperm domain-containing protein 1                      | X 131814688 131825706  | 0.099671              | -1.26            | 0.503167              | 1.19             | 0.663223              | 1.09             |
| LOC107128764 |                                                               | 2 256859 276791        | 0.099671              | -1.93            | 0.822896              | -1.24            | 0.595329              | -1.30            |
| NCAN         | neurocan core protein isoform X1                              | 19 19704162 19742102   | 0.099671              | -3.29            | 1.000000              | 2.37             | 0.601603              | -1.89            |
| RELL1        | uncharacterized protein LOC101926041                          | 5 37248146 37302576    | 0.099739              | 1.25             | 0.857309              | -1.06            | 0.931300              | 1.02             |
| LOC102144577 | LOW QUALITY PROTEIN: uncharacterized protein                  | 1 93629039 93629665    | 0.099770              | 1.37             | 0.387262              | -1.34            | 0.601182              | 1.13             |
| USP14        | ubiquitin carboxyl-terminal hydrolase 14 isoform 1            | 18 61417243 61470339   | 0.099770              | -1.27            | 0.974592              | 1.01             | 0.551381              | 1.11             |
| ACAN         | aggrecan core protein                                         | 7 69042075 69081001    | 0.099859              | 5.73             | 0.210275              | -2.52            | 0.719026              | -1.20            |
| IQCH         | IQ domain-containing protein H isoform 2                      | 7 44909564 45167566    | 0.099859              | 2.62             | 0.802222              | -1.59            | 0.528260              | -0.98            |
| LCORL        | ligand-dependent nuclear receptor corepressor 1               | 5 17016642 17192440    | 0.099903              | -1.35            | 0.848538              | 1.09             | 0.616339              | 1.12             |
| POP1         | ribonucleases P/MRP protein subunit POF1                      | 8 99279189 99317145    | 0.099925              | -1.39            | 0.829475              | -1.11            | 0.951641              | 1.02             |
| TET2         | methylcytosine dioxygenase TET2 isoform 1                     | 5 104668036 104710328  | 0.099997              | -1.25            | 0.474399              | 1.20             | 0.076973              | 1.30             |
| DOCK1        | dedicator of cytokinesis protein 1 isoform 1                  | 9 126232015 126832385  | 0.100058              | 1.28             | 0.886286              | 1.06             | 0.382741              | 1.17             |
| BAX          | apoptosis regulator BAX isoform X1                            | 19 49779996 49785391   | 0.100138              | -1.22            | 0.075685              | -1.39            | 0.238510              | -1.18            |
| LOC102118733 | putative V-set and immunoglobulin domain-containing protein   | 0 1330 1988            | 0.100213              | 2.47             | 0.399171              | -2.21            | 0.725505              | -1.27            |
| LOC102137841 |                                                               | 19 59085952 59089902   | 0.100254              | 1.24             | 0.944531              | 1.03             | 0.978457              | 1.01             |
| SLCO2A1      | uncharacterized protein LOC101926486                          | 2 36117222 36213494    | 0.100359              | 1.63             | 0.057346              | 2.34             | 0.733130              | 1.14             |
| SLCO3A1      | solute carrier organic anion transporter family 3 member 1    | 7 72411378 72730489    | 0.100479              | 1.12             | 0.007677              | -1.28            | 0.079923              | -1.14            |
| ASTN1        | astrotactin-1 isoform X2                                      | 1 34823941 35126658    | 0.100495              | 3.14             | 0.153816              | -4.72            | 0.985542              | -1.02            |
| YBX3         | Y-box-binding protein 3 isoform X8                            | 11 11018696 11040632   | 0.100495              | -1.24            | 0.035119              | 1.50             | 0.083465              | -1.28            |
| SYT13        | synaptotagmin-13                                              | 14 22307477 22349949   | 0.100530              | 2.84             | 0.967343              | -1.08            | 0.283867              | 2.38             |
| LOC102141943 |                                                               | 20 8246185 8335233     | 0.100806              | 7.08             | 1.000000              | 5.25             | 1.000000              | -1.20            |
| SLC1A2       | excitatory amino acid transporter 2 isoform 1                 | 14 32016559 32179195   | 0.100920              | -1.82            | 0.208268              | -2.14            | 0.871485              | 1.09             |
| ETNK2        | ethanolamine kinase 2 isoform X4                              | 1 62610538 62629919    | 0.100927              | 1.31             | 1.000000              | -1.00            | 0.537126              | 1.13             |
| UBC          | polyubiquitin-C                                               | 11 129294893 129296722 | 0.100927              | 1.16             | 0.861003              | -1.04            | 0.626975              | -1.20            |
| LOC107128773 |                                                               | 2 3800700 3803108      | 0.100967              | 4.00             | 1.000000              | -1.49            | 0.484110              | -1.77            |
| PRDX3        | uncharacterized protein LOC101864898                          | 9 118397383 118407513  | 0.100967              | -1.26            | 0.492393              | 1.20             | 0.441385              | 1.14             |
| FER1L5       | fer-1-like protein 5                                          | 13 1377033 1445690     | 0.101096              | 1.32             | 0.130960              | -1.50            | 0.693588              | 1.09             |
| EEF1A1       | uncharacterized protein LOC101925273                          | 4 100399695 100401918  | 0.101096              | 1.20             | 0.882966              | -1.04            | 0.825585              | 1.03             |
| LOC102125088 | cytochrome c-like                                             | 4 90357545 90357862    | 0.101157              | -4.23            | 0.070565              | 16.44            | 0.093251              | -5.35            |
| LOC102135951 | neuroblastoma breakpoint family member 1                      | 1 54899 58287          | 0.101376              | -1.79            | 0.221333              | -2.06            | 0.439367              | -1.39            |
| PRCD         | progressive rod-cone degeneration protein                     | 16 73923621 73926056   | 0.101420              | 2.04             | 0.741342              | 1.37             | 0.367261              | -1.60            |
| LOC102141023 |                                                               | 20 44672323 44673437   | 0.101497              | 1.81             | 0.083071              | -2.60            | 0.045735              | -2.30            |
| PRKAR2B      | cAMP-dependent protein kinase type II-beta regulatory subunit | 3 139519226 139631944  | 0.101497              | 1.48             | 0.402006              | 1.43             | 0.236244              | 1.39             |
| PDCL         | phosducin-like protein                                        | 15 13227253 13233911   | 0.101497              | -1.31            | 0.129551              | 1.49             | 0.251714              | 1.25             |
| HMOX1        | uncharacterized protein LOC101926565                          | 10 15905251 15918174   | 0.101497              | -2.29            | 0.990128              | -1.02            | 0.495650              | -1.53            |
| MYCN         | N-myc proto-oncogene protein isoform X1                       | 13 94998835 95005258   | 0.101638              | -1.44            | 0.472598              | -1.29            | 0.923619              | 1.03             |
| DDX58        | probable ATP-dependent RNA helicase DDX58                     | 15 46348339 46420261   | 0.101639              | -1.51            | 0.311528              | 1.56             | 0.356051              | 1.32             |
| LOC107128593 |                                                               | 4 214968 215678        | 0.101644              | 3.06             | 0.995062              | -1.01            | 0.027239              | -4.93            |
| LOC102118121 |                                                               | 6 117442216 117544439  | 0.101644              | 2.35             | 0.273206              | 2.78             | 0.720820              | -1.29            |
| STAMBP       | STAM-binding protein                                          | 13 36077625 36111888   | 0.101644              | -1.11            | 0.480212              | 1.08             | 0.484112              | 1.05             |
| LOC102119175 |                                                               | 9 74259319 74295468    | 0.101644              | -1.84            | 0.993669              | -1.01            | 0.626811              | 1.26             |
| CRLF1        | cytokine receptor-like factor 1                               | 19 19055077 19073879   | 0.101842              | 1.97             | 0.643516              | 1.49             | 0.184407              | -1.85            |
| COX3         | cytochrome c oxidase subunit III                              | MT 9205 9988           | 0.101871              | -1.30            | 0.291181              | -1.34            | 0.549839              | -1.13            |
| SPINK8       | serine protease inhibitor Kazal-type 8 isoform 1              | 2 103398160 103428368  | 0.101983              | 5.12             | 1.000000              | -2.95            | 0.917662              | -1.18            |
| DDC2C        | doublecortin domain-containing protein 2                      | 4 146219536 146408409  | 0.101983              | 1.69             | 0.250908              | -1.79            | 0.535309              | -1.26            |
| FAM118A      | protein FAM118A isoform X5                                    | 10 5632422 5650692     | 0.101983              | 1.23             | 0.674364              | 1.11             | 0.505194              | -1.11            |
| ZDHHC9       | palmitoyltransferase ZDHHC9 isoform X1                        | X 126687389 126723961  | 0.102115              | -1.62            | 0.970871              | 1.03             | 0.791858              | -1.11            |
| TTL9         | probable tubulin polyglutamylase TTL9                         | 10 63202651 63270378   | 0.102501              | 4.34             | 0.956287              | 1.17             | 0.890939              | -1.21            |
| LOC107127712 |                                                               | 16 5413123 5416810     | 0.102544              | 2.48             | 0.243967              | 3.01             | 0.993613              | 1.01             |
| PCBD1        | pterin-4-alpha-carbinolamine dehydratase                      | 9 64785370 64789612    | 0.102544              | -1.22            | 0.432771              | -1.19            | 0.125909              | -1.23            |
| VAMP7        | vesicle-associated membrane protein 7 isoform 1               | X 152716362 152767713  | 0.102544              | -1.34            | 0.249370              | 1.42             | 0.334756              | 1.23             |
| LOC107127445 |                                                               | 14 110425467 110427753 | 0.102544              | -2.75            | 0.553499              | 2.15             | 0.465407              | 1.83             |
| PLGRKT       | plasminogen receptor (KT)                                     | 15 73596252 73668217   | 0.102759              | -1.27            | 0.084854              | -1.48            | 0.973325              | -1.01            |
| RP55         | 40S ribosomal protein S5                                      | 19 58988792 58996239   | 0.102861              | 1.22             | 0.387726              | -1.21            | 0.905833              | -1.02            |
| ACTN2        | alpha-actinin-2 isoform X1                                    | 1 12715982 12791845    | 0.102971              | 1.86             | 0.066504              | 2.91             | 0.722233              | -1.19            |
| SNPH         | synthaphilin isoform X2                                       | 10 61294542 61303429   | 0.102971              | 1.67             | 0.638796              | 1.35             | 0.626639              | 1.21             |
| BCAS2        | uncharacterized protein LOC101865363                          | 1 112177280 112191353  | 0.102991              | -1.15            | 0.733157              | 1.07             | 0.774598              | 1.03             |
| LOC102141681 | adenylate kinase 9                                            | 4 13403401 13479378    | 0.103021              | 1.54             | 0.777657              | -1.18            | 0.963154              | -1.02            |
| TMEM71       | transmembrane protein 71 isoform X6                           | 8 134076687 134127585  | 0.103021              | 1.51             | 0.730253              | -1.20            | 0.877174              | 1.06             |
| AMIGO1       | amphoterin-induced protein 1                                  | 1 117244144 117245625  | 0.103055              | 1.61             | 0.351804              | 1.62             | 0.884135              | 1.06             |



| Gene symbol  | Gene name                                               | chr_start_end          | Day3 adjusted P-value | Day3 fold change | Day5 adjusted P-value | Day5 fold change | Day7 adjusted P-value | Day7 fold change |
|--------------|---------------------------------------------------------|------------------------|-----------------------|------------------|-----------------------|------------------|-----------------------|------------------|
| GPR25        | probable G-protein coupled receptor 25                  | 1 59228446 59229531    | 0.103076              | 1.83             | 0.009113              | -3.42            | 0.996598              | 1.00             |
| BCL2L2       | bcl-2-like protein 2                                    | 7 87029149 87030349    | 0.103222              | 1.27             | 0.244182              | 1.33             | 0.679130              | -1.08            |
| UBE2D3       | ubiquitin-conjugating enzyme E2 D3 isoform 3            | 5 102118255 102147639  | 0.103222              | -1.31            | 0.404976              | 1.28             | 0.651711              | 1.10             |
| OTX1         | homeobox protein OTX1                                   | 13 46988551 46991928   | 0.103392              | 3.89             | 0.848552              | -1.49            | 0.639227              | 1.74             |
| UBE2W        | ubiquitin-conjugating enzyme E2 W isoform 2             | 8 74975801 75046363    | 0.103392              | -1.46            | 0.411047              | 1.41             | 0.542522              | 1.19             |
| ZNF555       | zinc finger protein 555 isoform X1                      | 19 2770209 2783660     | 0.103409              | 1.22             | 0.775061              | 1.08             | 0.431010              | 1.12             |
| LOC102146479 |                                                         | 16 42235296 42252683   | 0.103532              | 3.04             | 0.128646              | -4.46            | 0.455919              | -1.62            |
| MTOR         | serine/threonine-protein kinase mTOR                    | 1 216883963 217029737  | 0.103532              | 1.17             | 0.917945              | -1.03            | 0.917642              | 1.01             |
| SERF2        | small EDRK-rich factor 2 isoform X1                     | 7 20744450 20746046    | 0.103532              | -1.27            | 0.573089              | -1.18            | 0.081590              | -1.32            |
| KIAA0825     | uncharacterized protein KIAA0825 homolog 1              | 6 92554083 92982443    | 0.103532              | -1.34            | 0.417555              | 1.30             | 0.310932              | 1.24             |
| UBA5         | uncharacterized protein LOC101867126                    | 2 34888722 34905115    | 0.103532              | -1.36            | 0.965744              | -1.03            | 0.817276              | 1.06             |
| QKI          | protein quaking isoform X3                              | 4 7366206 7486349      | 0.103532              | -1.37            | 0.017946              | 1.93             | 0.272275              | 1.28             |
| RNF11        | RING finger protein 11                                  | 1 176273982 176308341  | 0.103532              | -1.55            | 0.112633              | 1.95             | 0.458372              | 1.27             |
| SEC23A       | protein transport protein Sec23A                        | 7 103002765 103078319  | 0.103532              | -1.66            | 0.258955              | 1.81             | 0.814366              | 1.10             |
| LOC102138600 | EF-hand calcium-binding domain-containing protein 1     | 3 138019596 138035070  | 0.103825              | 4.11             | 0.979974              | -1.07            | 0.905144              | -1.18            |
| LOC102144231 | aldo-keto reductase family 1 member C2-like protein 1   | 9 5655859 5667927      | 0.103937              | 3.08             | 0.694214              | 1.67             | 0.856990              | 1.20             |
| LOC102130961 | dedicator of cytokinesis protein 6                      | 19 11542146 11552311   | 0.103937              | 1.42             | 0.512265              | 1.30             | 0.697582              | 1.12             |
| NANP         | N-acylneuraminate-9-phosphatase                         | 10 36689910 36697791   | 0.103937              | -1.32            | 0.715842              | 1.14             | 0.590413              | 1.12             |
| SRD5A3       | polyprenol reductase isoform X4                         | 5 79096266 79137198    | 0.103962              | -1.21            | 0.428144              | -1.18            | 0.154468              | -1.20            |
| CDK15        | cyclin-dependent kinase 15 isoform X1                   | 12 91225363 91313100   | 0.104063              | 1.57             | 0.809541              | 1.17             | 0.731903              | -1.13            |
| TCIRG1       | V-type proton ATPase 116 kDa subunit a                  | 14 6641914 6653271     | 0.104067              | -1.30            | 0.184778              | -1.42            | 0.638928              | -1.10            |
| FGFR1OP      | FGFR1 oncogene partner isoform X5                       | 4 3682582 3724858      | 0.104130              | -1.27            | 0.742915              | -1.11            | 0.678291              | 1.08             |
| LOC107131100 | uncharacterized protein LOC107131100                    | 10 64648043 64648651   | 0.104165              | 6.09             | 1.000000              | -1.06            | 0.996126              | -1.01            |
| IGSF9        | protein turtle homolog A isoform X1                     | 1 91730184 91746324    | 0.104312              | 1.58             | 0.514306              | -1.41            | 0.115838              | -1.62            |
| LOC102118879 |                                                         | 14 47594594 47597776   | 0.104434              | 2.79             | 0.724832              | -2.13            | 0.391624              | 2.13             |
| LOC101925321 | noelin                                                  | 15 3241773 3279987     | 0.104434              | 1.30             | 0.872618              | 1.07             | 0.968056              | 1.01             |
| NEK4         | serine/threonine-protein kinase Nek4 isoform 1          | 2 108009481 108081877  | 0.104434              | 1.21             | 0.615211              | 1.12             | 0.901243              | -1.02            |
| PC           | pyruvate carboxylase, mitochondrial isoform 1           | 14 7563012 7625138     | 0.104434              | -1.31            | 0.023024              | -1.72            | 0.287742              | -1.23            |
| POLR3G       | DNA-directed RNA polymerase III subunit 3               | 6 88890363 88917650    | 0.104434              | -1.57            | 0.709084              | 1.24             | 0.604891              | -1.20            |
| TMOD2        | tropomodulin-2 isoform X1                               | 7 28757478 28798487    | 0.104535              | 1.51             | 0.279617              | 1.60             | 0.260180              | 1.40             |
| SASS6        | spindle assembly abnormal protein 6 homolog 1           | 1 126712784 126759625  | 0.104535              | -1.66            | 0.966279              | 1.04             | 0.326892              | 1.43             |
| HAUS7        | HAUS augmin-like complex subunit 7                      | X 150418716 150438756  | 0.105082              | 1.17             | 0.984610              | -1.01            | 0.806210              | 1.03             |
| SRSF6        | serine/arginine-rich splicing factor 6                  | 10 75150997 75155105   | 0.105230              | -1.26            | 0.940765              | 1.03             | 0.482542              | -1.13            |
| MSANTD4      | myb/SANT-like DNA-binding domain-containing protein 4   | 14 102044348 102045725 | 0.105278              | -1.29            | 0.156378              | 1.43             | 0.483406              | 1.14             |
| TMEM63B      | CSC1-like protein 2 isoform X2                          | 4 126365686 126387665  | 0.105453              | 1.28             | 0.047093              | -1.57            | 0.140149              | -1.29            |
| ZNF532       | zinc finger protein 532 isoform X6                      | 18 21531709 21621801   | 0.105453              | 1.26             | 0.453775              | 1.22             | 0.455130              | 1.14             |
| EEF2K        | eukaryotic elongation factor 2 kinase                   | 20 21063835 21126722   | 0.105453              | -1.28            | 0.487849              | -1.22            | 0.369789              | 1.18             |
| PLEKHA3      | pleckstrin homology domain-containing family A member 3 | 12 67473366 67497034   | 0.105453              | -1.29            | 0.449048              | 1.25             | 0.336347              | 1.20             |
| YTHDF3       | YTH domain-containing family protein 3                  | 8 64266129 64305200    | 0.105453              | -1.34            | 0.167735              | 1.50             | 0.553696              | 1.14             |
| LOC107127626 |                                                         | 15 40308772 40311437   | 0.105453              | -2.10            | 0.738595              | -1.40            | 0.617891              | -1.32            |
| ZNF778       | LOW QUALITY PROTEIN: zinc finger protein 778            | 0 11209 22377          | 0.105493              | 1.46             | 0.838896              | -1.13            | 0.848046              | -1.07            |
| TCF7         | transcription factor 7 isoform X7                       | 6 133132536 133167124  | 0.105537              | 1.37             | 0.993973              | -1.00            | 0.857193              | 1.05             |
| LOC101926401 | uncharacterized protein C10orf68 homolog 1              | 9 33257216 33486639    | 0.105537              | -1.97            | 0.974592              | 1.04             | 0.362168              | -1.59            |
| LOC102121103 | xxa-Pro dipeptidase isoform X1                          | 19 33811138 33883660   | 0.105602              | 1.36             | 0.238623              | -1.45            | 0.810252              | 1.06             |
| PTOV1        | prostate tumor-overexpressed gene 1 protein             | 19 50733612 50743271   | 0.105602              | 1.27             | 0.657091              | -1.14            | 0.230726              | -1.23            |
| ALDH7A1      | alpha-aminoacidic semialdehyde dehydrogenase 7          | 6 125489912 125540927  | 0.105602              | 1.22             | 0.067371              | -1.40            | 0.230640              | -1.18            |
| WDR25        | WD repeat-containing protein 25                         | 7 165597186 165744876  | 0.105602              | 1.19             | 0.567865              | -1.13            | 0.857760              | 1.03             |
| CNTD2        | CyN-terminal domain-containing protein 2                | 19 40700407 40704907   | 0.105602              | -3.65            | 1.000000              | -3.19            | 0.445745              | -2.47            |
| KCNK10       | potassium channel subfamily K member 10                 | 7 153104348 153249354  | 0.105662              | 1.71             | 0.960055              | -1.05            | 0.514015              | 1.31             |
| WNK2         | LOW QUALITY PROTEIN: serine/threonine kinase 2          | 15 107299915 107372119 | 0.105690              | 1.86             | 0.781775              | 1.29             | 0.320845              | 1.67             |
| NQO1         | NAD(P)H dehydrogenase [quinone] 1                       | 20 58020001 58038088   | 0.105773              | -1.45            | 0.831558              | 1.12             | 0.565261              | -1.18            |
| LOC102118051 | leucine zipper putative tumor suppressor 3              | 10 59345928 59349302   | 0.105796              | 1.50             | 0.935150              | 1.06             | 0.287784              | -1.36            |
| NCBP2        | nuclear cap-binding protein subunit 2                   | 2 1240337 1246531      | 0.105796              | -1.21            | 0.791630              | -1.07            | 0.862128              | -1.03            |
| AMBP         | protein AMBP                                            | 15 23504039 23521891   | 0.105803              | 6.54             | 1.000000              | -3.17            | 0.723472              | -1.57            |
| ZC3H18       | zinc finger CCCH domain-containing protein 18           | 20 77004534 77066137   | 0.105803              | 1.17             | 0.307972              | -1.19            | 0.736816              | 1.04             |
| HNL1         | hematological and neurological expressed protein 1      | 20 1733958 1752491     | 0.105803              | -1.21            | 0.941795              | -1.02            | 0.833535              | 1.03             |
| SPOLP        | speckle-type POZ protein-like isoform X1                | 12 26909808 26928590   | 0.105803              | -1.39            | 0.201112              | 1.54             | 0.356582              | 1.25             |
| PTBP3        | polypyrimidine tract-binding protein 3 isoform 1        | 15 25231597 25342075   | 0.106063              | -1.42            | 0.450529              | 1.34             | 0.446080              | 1.22             |
| BTN3A2       | butyrophilin subfamily 3 member A2 isoform 4            | 4 144200097 144206000  | 0.106462              | 1.39             | 0.757402              | 1.15             | 0.549660              | 1.16             |
| LOC102120721 | LOW QUALITY PROTEIN: cocaine esterase 1                 | 20 55109151 55120611   | 0.106540              | 1.88             | 0.310780              | 2.22             | 0.645272              | -1.29            |
| CCNDBP1      | cyclin-D1-binding protein 1                             | 7 20171182 20181374    | 0.106615              | 1.17             | 0.362880              | -1.17            | 0.646006              | -1.06            |
| SMS          | spermine synthase isoform X1                            | X 19874023 19938398    | 0.106622              | -1.28            | 0.832759              | -1.08            | 0.398085              | -1.17            |
| CARD19       | bcl10-interacting CARD protein isoform 1                | 15 107159550 107177342 | 0.106622              | -1.23            | 0.107128              | -1.38            | 0.543034              | -1.10            |
| LOC102145943 | putative fatty acid desaturase 2-like protein 1         | 14 16616175 16653400   | 0.106761              | 2.43             | 0.009345              | -7.32            | 0.560601              | -1.49            |
| LOC102124488 | RNA polymerase-associated protein LEO1                  | 7 28890446 28916682    | 0.106761              | -1.81            | 0.955892              | 1.06             | 0.400981              | -1.44            |
| ACKR4        | atypical chemokine receptor 4                           | 2 34830942 34831994    | 0.106775              | -1.87            | 0.724920              | 1.34             | 0.882032              | -1.08            |
| C15H9orf47   | LOW QUALITY PROTEIN: uncharacterized protein C15orf47   | 15 99630428 99632501   | 0.106984              | 1.96             | 0.020636              | 4.43             | 0.978327              | -1.02            |
| ANKRD33B     | ankyrin repeat domain-containing protein 33B            | 6 10668666 10754554    | 0.106984              | 1.49             | 0.895927              | 1.09             | 0.953739              | 1.02             |
| C14H1orf73   | protein Hkeshi isoform X1                               | 14 81878470 81918905   | 0.106984              | -1.12            | 0.919489              | -1.02            | 0.295320              | -1.09            |
| LOC102130554 | zinc finger protein 25-like protein 1                   | 9 37426324 37427430    | 0.106984              | -4.41            | 0.184552              | -7.95            | 0.004076              | 18.04            |
| PAFAH1B2     | platelet-activating factor acetylhydrolase 1B isoform 2 | 14 113105572 113126496 | 0.107097              | -1.20            | 0.236097              | 1.25             | 0.236181              | 1.17             |
| LOC107126592 |                                                         | 10 67574374 67577235   | 0.107108              | 3.66             | 0.915946              | -1.26            | 0.495554              | -2.10            |
| SHF          | SH2 domain-containing adapter protein F                 | 7 22081372 22113897    | 0.107195              | 1.37             | 0.973924              | 1.02             | 0.450963              | -1.19            |
| CNN3         | calponin-3 isoform X2                                   | 1 131992286 132028065  | 0.107342              | -1.26            | 0.991317              | 1.00             | 0.920710              | 1.02             |
| MANBAL       | protein MANBAL                                          | 10 68872024 68887965   | 0.107624              | 1.18             | 0.767140              | 1.07             | 0.098683              | -1.21            |
| GOLGA2       | golgin subfamily A member 2 isoform X1                  | 15 10929117 10948319   | 0.107671              | 1.11             | 0.190971              | -1.15            | 0.811880              | -1.02            |
| CDC73        | parafibromin                                            | 1 51305921 51443667    | 0.107671              | -1.38            | 0.196674              | 1.53             | 0.375647              | 1.24             |
| SLC16A13     | monocarboxylate transporter 13                          | 16 7065392 7068437     | 0.107671              | -1.42            | 0.305527              | -1.48            | 0.261345              | 1.34             |
| TRIM2        | tripartite motif-containing protein 2 isoform 1         | 5 152434205 152564925  | 0.107671              | -1.49            | 0.560492              | 1.32             | 0.472629              | 1.24             |
| LOC107129091 |                                                         | 3 31370062 31378464    | 0.107671              | -1.75            | 0.966516              | 1.05             | 0.557490              | -1.30            |
| LOC102132592 | leucine-rich repeat-containing protein 37A              | 16 57521949 57558940   | 0.107781              | 1.97             | 0.735924              | -1.38            | 0.707769              | -1.25            |
| ARHGEF33     | rho guanine nucleotide exchange factor 33               | 13 71653339 71750583   | 0.107781              | 1.39             | 0.775051              | -1.13            | 0.808987              | 1.07             |
| DDHD1        | phospholipase DDHD1 isoform X7                          | 7 117251678 117375880  | 0.107781              | -1.21            | 0.289491              | 1.24             | 0.105099              | 1.24             |
| ZYX          | zyxin isoform X2                                        | 3 176564733 176574466  | 0.108167              | 1.18             | 0.623775              | 1.11             | 0.941476              | 1.01             |
| GPR107       | protein GPR107                                          | 15 8933091 9022171     | 0.108167              | 1.14             | 0.887889              | 1.03             | 0.336135              | 1.10             |
| KLHL9        | kelch-like protein 9                                    | 15 57451274 57453127   | 0.108277              | -1.19            | 0.233423              | 1.24             | 0.100876              | 1.21             |
| RORA         | nuclear receptor ROR-alpha isoform X1                   | 7 37855556 38042501    | 0.108277              | -1.44            | 0.473932              | 1.35             | 0.954015              | 1.02             |

| Gene symbol  | Gene name                                    | chr_start_end          | Day3 adjusted P-value | Day3 fold change | Day5 adjusted P-value | Day5 fold change | Day7 adjusted P-value | Day7 fold change |
|--------------|----------------------------------------------|------------------------|-----------------------|------------------|-----------------------|------------------|-----------------------|------------------|
| CLCNKB       | chloride channel protein CIC-Kb isoform      | 1 212356368 212369141  | 0.108332              | 3.63             | 0.885919              | -1.27            | 0.285153              | -2.31            |
| CFBF         | core-binding factor subunit beta isoform X   | 20 55176220 55250919   | 0.108332              | -1.55            | 0.453500              | 1.45             | 0.492448              | 1.26             |
| NT5C3B       | 7-methylguanosine phosphate-specific 5'-     | 16 53509318 53525086   | 0.108358              | 1.29             | 0.851741              | -1.08            | 0.857760              | -1.04            |
| SRD5A2       | 3-oxo-5-alpha-steroid 4-dehydrogenase 2      | 13 79145698 79200410   | 0.108588              | 5.34             | 1.000000              | -4.25            | 0.590153              | 1.98             |
| NAP1L5       | nucleosome assembly protein 1-like 5         | 5 87839123 87839671    | 0.108588              | -1.36            | 0.322796              | 1.39             | 0.373545              | 1.22             |
| NDRG2        | protein NDRG2 isoform X2                     | 7 84569867 84575575    | 0.108711              | 1.67             | 0.725521              | 1.27             | 0.891672              | -1.06            |
| RS1          | retinoschisin                                | X 16527122 16555439    | 0.108763              | 2.65             | 0.020592              | 8.87             | 0.581343              | -1.50            |
| CR2          | complement receptor type 2 isoform X1        | 1 66033851 66067850    | 0.108763              | 2.42             | 0.134806              | -3.76            | 0.628434              | 1.40             |
| POLR3B       | DNA-directed RNA polymerase III subun        | 11 110071506 110256956 | 0.108763              | -1.20            | 0.932714              | 1.03             | 0.703750              | 1.06             |
| MSLN         | mesothelin isoform X1                        | 20 789881 797459       | 0.109125              | 3.73             | 0.370091              | 3.64             | 0.509168              | -1.94            |
| CFAP43       | cilia- and flagella-associated protein 43 is | 9 103206650 103314272  | 0.109125              | 2.62             | 0.805191              | 1.41             | 0.264479              | -2.19            |
| TXNIP        | thioredoxin-interacting protein              | 1 104332853 104335285  | 0.109125              | 1.54             | 0.130360              | 1.90             | 0.612569              | 1.19             |
| LOC102115683 |                                              | 8 82512483 82528546    | 0.109138              | -1.63            | 0.368241              | 1.61             | 0.783561              | 1.12             |
| SKAP1        | src kinase-associated phosphoprotein 1 iso   | 16 33475270 33784108   | 0.109152              | 1.35             | 0.061236              | -1.68            | 0.898225              | -1.03            |
| IDH3A        | isocitrate dehydrogenase [NAD] subunit a     | 7 56482754 56502944    | 0.109152              | -1.23            | 0.649778              | 1.13             | 0.904890              | 1.02             |
| C2H3orf38    | uncharacterized protein C3orf38 homolog      | 2 180013662 180021897  | 0.109152              | -1.35            | 0.404865              | 1.33             | 0.467237              | 1.18             |
| MOB1B        | MOB kinase activator 1B isoform X2           | 5 63581680 63657285    | 0.109152              | -1.49            | 0.498976              | 1.36             | 0.473801              | 1.24             |
| C3H21orf62   | uncharacterized protein C21orf62 homolo      | 3 13968253 13968912    | 0.109375              | 2.40             | 0.830283              | 1.30             | 0.297738              | -1.89            |
| LOC102143922 | LOW QUALITY PROTEIN: leukocyte in            | 19 7290 13938          | 0.109431              | 1.87             | 0.677006              | 1.40             | 0.167756              | 1.84             |
| BCAT2        | branched-chain-amino-acid aminotransfer      | 19 49620608 49639998   | 0.109464              | 1.37             | 0.982229              | 1.01             | 0.295163              | -1.27            |
| GTF2H5       | general transcription factor IIIH subunit 5  | 4 64587694 64598029    | 0.109464              | -1.26            | 0.645472              | -1.14            | 0.462139              | -1.13            |
| LSM5         | U6 snRNA-associated Sm-like protein LS       | 3 88183628 88186725    | 0.109671              | -1.34            | 0.495550              | -1.26            | 0.474043              | 1.19             |
| PTN          | pleiotrophin isoform X2                      | 3 170200249 170297442  | 0.109679              | 1.85             | 0.956488              | 1.06             | 0.834287              | 1.11             |
| SNCA         | alpha-synuclein                              | 5 88891926 88999677    | 0.109679              | 1.55             | 0.026600              | 2.81             | 0.210026              | -1.52            |
| PRPF6        | pre-mRNA-processing factor 6                 | 10 96193794 96252625   | 0.109679              | 1.14             | 0.334193              | -1.15            | 0.175972              | -1.14            |
| LOC107126578 |                                              | 10 89609493 89611750   | 0.109780              | 2.18             | 0.463607              | -1.95            | 0.626276              | -1.31            |
| LOC102117077 | uracase isoform X1                           | 1 142859109 142892010  | 0.109782              | -2.21            | 0.688332              | -1.51            | 0.678291              | -1.29            |
| NRIP2        | nuclear receptor-interacting protein 2 iso   | 11 3002660 3012055     | 0.109789              | 1.54             | 0.567942              | 1.35             | 0.382539              | 1.03             |
| TESPA1       | protein TESPA1 isoform X2                    | 11 53874646 53888028   | 0.109814              | 1.36             | 0.272419              | -1.43            | 0.854950              | 1.05             |
| OSBP2        | oxysterol-binding protein-related protein 2  | 10 94230219 94267633   | 0.109814              | 1.11             | 0.360379              | -1.11            | 0.101930              | -1.12            |
| LOC101926125 | uncharacterized protein LOC101926125         | 18 64470316 64475663   | 0.109814              | -1.12            | 0.951229              | -1.01            | 0.119738              | -1.13            |
| GJC2         | gap junction gamma-2 protein                 | 1 87011825 87013250    | 0.109977              | 1.79             | 0.672886              | 1.38             | 0.241016              | -1.64            |
| CHORDC1      | cysteine and histidine-rich domain-contair   | 14 85924023 85945067   | 0.110051              | -1.37            | 0.349160              | 1.38             | 0.753431              | 1.08             |
| LOC102130358 | Ig heavy chain V-I region V35-like           | 0 220752 221213        | 0.110103              | 2.09             | 0.584741              | 1.54             | 0.935033              | 1.05             |
| CX3CR1       | uncharacterized protein LOC101925250         | 2 94187313 94189805    | 0.110103              | 1.67             | 0.796842              | 1.21             | 0.223512              | 1.57             |
| AGBL4        | cytosolic carboxypeptidase 6 isoform X2      | 1 177547335 179003884  | 0.110103              | 1.62             | 0.849353              | -1.15            | 0.969193              | -1.02            |
| POLM         | DNA-directed DNA/RNA polymerase mu           | 3 76436886 76450511    | 0.110103              | 1.44             | 0.580749              | -1.28            | 0.266865              | -1.34            |
| LOC102137606 | ovostatin-like isoform X2                    | 11 9596014 9744504     | 0.110103              | 1.29             | 0.208125              | -1.40            | 0.861243              | 1.04             |
| LOC102140788 | 60S ribosomal protein L26                    | 5 107777888 107778325  | 0.110103              | 1.16             | 0.729994              | -1.07            | 0.871016              | -1.02            |
| RPS6KB1      | uncharacterized protein LOC101925564         | 16 45463156 45521546   | 0.110103              | -1.24            | 0.271883              | 1.29             | 0.605487              | 1.09             |
| LIMA1        | LIM domain and actin-binding protein 1 i     | 11 49037300 49111182   | 0.110103              | -1.41            | 0.533939              | -1.29            | 0.353176              | 1.27             |
| ALDH8A1      | aldehyde dehydrogenase family 8 membe        | 4 39214870 39245375    | 0.110103              | -1.80            | 0.591341              | -1.43            | 0.568664              | -1.28            |
| LOC107128440 |                                              | X 49303831 49307377    | 0.110103              | -2.77            | 0.766439              | -1.48            | 0.818370              | 1.21             |
| ABCA4        | retinal-specific ATP-binding cassette trans  | 1 132826711 132952600  | 0.110426              | -1.75            | 0.959039              | 1.06             | 0.837933              | 1.10             |
| GPATCH1      | G patch domain-containing protein 1 isofo    | 19 33433941 33475420   | 0.110461              | 1.23             | 0.463260              | -1.20            | 0.585283              | 1.09             |
| ZBED8        | protein ZBED8                                | 6 159830863 159832644  | 0.110461              | -1.22            | 0.048507              | 1.43             | 0.027175              | 1.33             |
| KIZ          | centrosomal protein kizuna isoform X4        | 10 41040534 41162339   | 0.110478              | 1.16             | 0.197299              | -1.22            | 0.643441              | -1.06            |
| WIPI2        | uncharacterized protein LOC101865895         | 3 40882215 40895183    | 0.110478              | -2.15            | 0.217498              | -2.45            | 0.404874              | -1.57            |
| ADAT1        | tRNA-specific adenosine deaminase 1          | 20 63769518 63793176   | 0.110570              | 1.61             | 0.631084              | -1.32            | 0.101980              | 1.70             |
| HSD3B7       | 3 beta-hydroxysteroid dehydrogenase type     | 20 29637074 29640187   | 0.110570              | 1.29             | 0.744961              | -1.12            | 0.847658              | -1.04            |
| MBTPS2       | membrane-bound transcription factor site-    | X 19772455 19830566    | 0.110570              | -1.28            | 0.968189              | 1.02             | 0.225169              | 1.25             |
| ABCC5        | multidrug resistance-associated protein 5    | 2 88592810 88687037    | 0.110570              | -1.29            | 0.821908              | -1.09            | 0.266288              | -1.23            |
| ARL14EP      | ARL14 effector protein                       | 14 37090939 37096753   | 0.110623              | -1.22            | 0.583450              | 1.14             | 0.489799              | 1.11             |
| DIMT1        | probable dimethyladenosine transferase       | 6 61991275 62004725    | 0.110623              | -1.34            | 0.477699              | 1.28             | 0.427836              | 1.19             |
| JOSD2        | josephin-2                                   | 19 51342290 51345961   | 0.110623              | -1.36            | 0.447654              | -1.31            | 0.951721              | 1.02             |
| LOC107126913 |                                              | 12 64153868 64160551   | 0.110623              | -2.07            | 0.838045              | 1.28             | 0.733941              | -1.24            |
| SLC37A4      | uncharacterized protein LOC101867441         | 14 115054050 115058539 | 0.110684              | 1.30             | 0.519426              | -1.22            | 0.442544              | 1.16             |
| RAP1B        | ras-related protein Rap-1b isoform X1        | 11 67694608 67704250   | 0.110708              | -1.45            | 0.500861              | 1.34             | 0.701902              | 1.12             |
| ABCA10       |                                              | 16 66289155 66372237   | 0.110709              | 1.43             | 0.422254              | -1.38            | 0.121908              | 1.51             |
| FAM160A1     | protein FAM160A1                             | 0 62015 154244         | 0.111401              | 1.54             | 0.899803              | -1.10            | 0.517925              | -1.23            |
| AGPAT1       | 1-acyl-sn-glycerol-3-phosphate acyltransf    | 4 138718619 138725866  | 0.111487              | 1.15             | 0.887333              | -1.03            | 0.998128              | -1.00            |
| SUZ12        | polycomb protein SUZ12 isoform X1            | 16 28166563 28237494   | 0.111487              | -1.47            | 0.369296              | 1.46             | 0.401971              | 1.27             |
| LOC102125710 | LOW QUALITY PROTEIN: kin of IRRE             | 19 36334752 36345872   | 0.111522              | 4.80             | 1.000000              | 1.00             | 0.028581              | 14.84            |
| CACNA2D2     | voltage-dependent calcium channel subun      | 2 105613750 105725498  | 0.111522              | 2.23             | 0.737033              | 1.44             | 0.973808              | 1.03             |
| LOC102139186 | LOW QUALITY PROTEIN: tumor necro             | 8 23302603 23321615    | 0.111522              | 1.77             | 0.888859              | -1.14            | 0.114478              | 1.88             |
| LRRCS8       | leucine-rich repeat-containing protein 58 i  | 2 151806401 151823860  | 0.111522              | -1.55            | 0.262806              | 1.69             | 0.434295              | 1.30             |
| JDP2         | jun dimerization protein 2                   | 7 140143794 140175662  | 0.111588              | -1.20            | 0.292378              | 1.23             | 0.341788              | -1.14            |
| LOC102114965 | LOW QUALITY PROTEIN: sialic acid-b           | 19 50841131 50857087   | 0.111634              | -1.41            | 0.014243              | -2.18            | 0.153633              | 1.44             |
| VPS72        | vacuolar protein sorting-associated protein  | 1 100814155 100831509  | 0.111759              | 1.14             | 0.921266              | 1.02             | 0.377048              | -1.09            |
| LOC102129023 | LOW QUALITY PROTEIN: supervillin-l           | 9 31282043 31323012    | 0.111784              | 1.47             | 0.106950              | -1.77            | 0.963605              | 1.02             |
| DVL2         | segment polarity protein dishevelled hom     | 16 7283104 7291580     | 0.111836              | 1.24             | 0.369764              | -1.24            | 0.838111              | -1.04            |
| KANSL1       | KAT8 regulatory NSL complex subunit 1        | 16 58393320 58355693   | 0.111836              | 1.15             | 0.527283              | -1.11            | 0.515656              | 1.07             |
| RAB13        | ras-related protein Rab-13 isoform X2        | 1 97881440 97885518    | 0.111878              | -1.20            | 0.010077              | -1.51            | 0.718302              | -1.06            |
| LOC102118724 | protein BEX2 isoform X1                      | X 100135221 100136231  | 0.111952              | 1.57             | 0.807442              | -1.17            | 0.790941              | -1.11            |
| SORCS3       | VPS10 domain-containing receptor SorCS       | 9 103726393 104337533  | 0.112087              | 1.62             | 0.011145              | 3.07             | 0.921540              | 1.04             |
| C16H17orf58  | UPF0450 protein C17orf58 homolog             | 16 65209518 65210722   | 0.112106              | -1.24            | 0.319962              | 1.26             | 0.039472              | 1.33             |
| LOC102145268 |                                              | 11 16958067 17030031   | 0.112331              | -4.70            | 1.000000              | -1.60            | 0.338703              | -2.38            |
| LOC102121395 |                                              | 6 151350981 151644508  | 0.112410              | -5.66            | 1.000000              | -1.42            | 1.000000              | -2.23            |
| C1H1orf27    | protein odr-4 homolog isoform X1             | 1 44297527 44336249    | 0.113037              | -1.20            | 0.517871              | 1.15             | 0.419921              | 1.12             |
| OSBP2        | oxysterol-binding protein 2 isoform X1       | 10 20513201 20734010   | 0.113099              | 1.85             | 0.751034              | 1.26             | 0.663130              | -1.21            |
| LMNTD1       | lamin tail domain-containing protein 1 iso   | 11 26152095 26198594   | 0.113156              | 9.04             | 1.000000              | 1.00             | 0.904471              | 1.27             |
| SERPINF7     | serpin B7                                    | 18 16530638 16552516   | 0.113156              | 3.30             | 0.966449              | 1.13             | 0.959352              | -1.07            |
| LOC102145067 | ETS domain-containing transcription fact     | 0 1873 3803            | 0.113156              | 3.07             | 0.444652              | -2.55            | 0.668755              | -1.39            |
| PRPS1        | ribose-phosphate pyrophosphokinase 1         | X 104724270 104745915  | 0.113156              | 1.19             | 0.094114              | 1.34             | 0.564773              | 1.08             |
| C20H16orf91  | protein CCSMST1                              | 20 1442774 1443341     | 0.113156              | -1.18            | 0.904043              | -1.03            | 0.643038              | -1.06            |
| AGPS         | alkylldihydroxyacetonephosphate synthase     | 12 66337346 66495228   | 0.113156              | -1.28            | 0.298708              | 1.32             | 0.308749              | 1.21             |
| CCDC126      | coiled-coil domain-containing protein 126    | 3 97119720 97145452    | 0.113156              | -1.41            | 0.030744              | 1.98             | 0.146657              | 1.42             |

| Gene symbol  | Gene name                                                 | chr_start_end          | Day3 adjusted P-value | Day3 fold change | Day5 adjusted P-value | Day5 fold change | Day7 adjusted P-value | Day7 fold change |
|--------------|-----------------------------------------------------------|------------------------|-----------------------|------------------|-----------------------|------------------|-----------------------|------------------|
| POGLUT1      | protein O-glucosyltransferase 1                           | 2 152700777 152724268  | 0.113276              | -1.17            | 0.663597              | 1.09             | 0.074489              | 1.20             |
| LAYN         | laylin isoform X1                                         | 14 107505517 107525477 | 0.113540              | 1.23             | 0.243551              | 1.29             | 0.509767              | -1.11            |
| DCLRE1B      | 5' exonuclease Apollo                                     | 1 112850172 112856686  | 0.113540              | -1.31            | 0.900598              | -1.06            | 0.548174              | -1.14            |
| TSGA13       | testis-specific gene 13 protein                           | 3 163404243 163419897  | 0.113769              | 1.64             | 0.917946              | -1.09            | 0.336188              | 1.42             |
| NDC1         | nucleoporin NDC1                                          | 1 173638276 173663718  | 0.113825              | -1.33            | 0.584157              | 1.21             | 0.745641              | 1.08             |
| TCTEX1D1     | tcetx1 domain-containing protein 1                        | 1 160576889 160599713  | 0.113845              | 3.12             | 0.979974              | -1.07            | 0.616956              | 1.67             |
| HSPA1L       | heat shock 70 kDa protein 1-like                          | 4 139053540 139055465  | 0.113845              | 1.77             | 0.516751              | 1.55             | 0.910996              | -1.06            |
| ZNF418       | zinc finger protein 418 isoform X2                        | 19 58527549 58534385   | 0.113845              | 1.69             | 0.429526              | -1.60            | 0.246524              | 1.56             |
| SLC35E2B     | solute carrier family 35 member E2B isoform X1            | 1 226723021 226740104  | 0.113845              | 1.27             | 0.473941              | -1.22            | 0.416031              | 1.16             |
| GMEB2        | glucocorticoid modulatory element-binding protein 2       | 10 95791244 95812428   | 0.113845              | 1.17             | 0.960153              | -1.01            | 0.616339              | -1.07            |
| LOC102123956 | ankyrin repeat and KH domain-containing protein 1         | 6 139548703 139688480  | 0.113845              | 1.13             | 0.956645              | -1.01            | 0.075303              | -1.16            |
| LOC107128607 |                                                           | 7 32074 38449          | 0.113845              | -1.80            | 0.859712              | 1.18             | 0.439881              | -1.42            |
| CA6          | carbonic anhydrase 6 isoform X2                           | 1 219301263 219339903  | 0.113936              | 2.47             | 0.713277              | -1.58            | 0.831355              | 1.18             |
| SPATA25      | spermatogenesis-associated protein 25                     | 10 77556362 77557436   | 0.113936              | 1.68             | 0.310349              | -1.80            | 0.382741              | -1.42            |
| WNT5B        | protein Wnt-5b isoform X1                                 | 11 1737158 1759911     | 0.113936              | 1.59             | 0.816069              | -1.17            | 0.129051              | 1.61             |
| MGARP        | protein MGARP                                             | 5 138580302 138592750  | 0.113944              | -1.94            | 0.808004              | 1.33             | 0.958003              | -1.03            |
| MUC20        | mucin-20 isoform X2                                       | 2 36259 48105          | 0.114316              | 1.64             | 0.297322              | -1.74            | 0.076047              | -1.81            |
| CSTF1        | cleavage stimulation factor subunit 1                     | 10 88235003 88243226   | 0.114345              | -1.27            | 0.863478              | 1.06             | 0.558480              | 1.11             |
| CLEC17A      | C-type lectin domain family 17, member 1                  | 19 14978217 15002235   | 0.114393              | 2.10             | 0.550394              | -1.74            | 0.747667              | 1.22             |
| AZGP1        | zinc-alpha-2-glycoprotein                                 | 3 44307453 44316370    | 0.114581              | 8.34             | 1.000000              | 5.22             | 1.000000              | 1.27             |
| METTL7A      | methyltransferase-like protein 7A                         | 11 49824853 49830003   | 0.114649              | 1.35             | 0.973853              | 1.02             | 0.168188              | 1.35             |
| XPA          | DNA repair protein complementing XP-A                     | 15 40081594 40104088   | 0.114665              | -1.26            | 0.469081              | -1.21            | 0.226002              | -1.23            |
| RDH11        | retinol dehydrogenase 11 isoform X3                       | 7 132202512 132224212  | 0.114733              | 1.29             | 0.929363              | 1.04             | 0.226264              | 1.25             |
| CDC42EP1     | cdc42 effector protein 1                                  | 10 13693840 13696480   | 0.114812              | 1.33             | 0.958820              | -1.03            | 0.400290              | -1.20            |
| LAGE3        | EKC/KEOPS complex subunit LAGE3                           | X 151379454 151380451  | 0.114820              | -1.32            | 0.419725              | -1.29            | 0.561912              | -1.14            |
| IMPA1        |                                                           | 8 82842517 82866221    | 0.114871              | -1.30            | 0.485373              | 1.24             | 0.474043              | 1.15             |
| LOC102124595 |                                                           | 12 80501873 80519357   | 0.114901              | 1.63             | 0.021740              | 2.68             | 0.272998              | 1.46             |
| ISCA1        | iron-sulfur cluster assembly 1 homolog, nuclear           | 15 96945072 96959752   | 0.114901              | -1.15            | 0.245817              | 1.19             | 0.425458              | 1.09             |
| SLC39A10     | zinc transporter ZIP10 isoform X1                         | 12 84855871 84932743   | 0.114901              | -1.41            | 0.741584              | 1.17             | 0.513479              | 1.19             |
| LOC102140350 | DNA-directed RNA polymerase III subunit 3                 | 3 56307762 56336475    | 0.114963              | -3.01            | 0.879240              | -1.30            | 0.641767              | -1.50            |
| PSMG3        | proteasome assembly chaperone 3                           | 3 36472440 36474064    | 0.115003              | -1.23            | 0.492464              | -1.18            | 0.230726              | -1.19            |
| FBXO22       | F-box only protein 22                                     | 7 54167590 54197062    | 0.115104              | -1.17            | 0.379215              | -1.16            | 0.378254              | -1.11            |
| LOC102131845 |                                                           | 19 6920838 6932028     | 0.115239              | 2.14             | 0.981655              | 1.04             | 0.782917              | -1.21            |
| C4H6orf89    | bombesin receptor-activated protein C6orf89               | 4 133810186 133842664  | 0.115239              | 1.10             | 0.076458              | -1.17            | 0.861994              | -1.01            |
| LOC101864946 |                                                           | 16 5537000 5538968     | 0.115251              | 1.68             | 0.940181              | 1.07             | 0.292244              | -1.44            |
| MASIL        | mas-related G-protein coupled receptor M                  | 4 141312634 141313614  | 0.115264              | 5.09             | 1.000000              | 1.13             | 0.143168              | 3.33             |
| RIPPLY1      | protein ripply1                                           | X 104023363 104025909  | 0.115264              | 1.83             | 0.950140              | -1.07            | 0.442045              | -1.40            |
| LOC102135242 | heparan sulfate glucosamine 3-O-sulfotransferase 1        | 16 14485166 14485720   | 0.115264              | 1.53             | 0.827938              | -1.13            | 0.886454              | 1.05             |
| LOC102140916 | tyrosine-protein kinase Lck isoform X4                    | 0 368 3033             | 0.115264              | 1.48             | 0.331145              | -1.51            | 0.366641              | 1.30             |
| CCDC59       | thyroid transcription factor 1-associated protein 59      | 11 81552399 81558070   | 0.115264              | -1.15            | 0.954772              | 1.02             | 0.737895              | -1.04            |
| ATOX1        | copper transport protein ATOX1 isoform X1                 | 6 151066254 151078447  | 0.115264              | -1.28            | 0.479791              | -1.22            | 0.051288              | -1.38            |
| LOC107130753 |                                                           | 9 7254887 7412911      | 0.115264              | -1.87            | 0.110948              | -2.22            | 0.816647              | 1.11             |
| LOC102127618 |                                                           | 4 43816666 43855496    | 0.115299              | 2.34             | 0.966449              | -1.06            | 0.666172              | 1.35             |
| COL23A1      | collagen alpha-1(XXIII) chain isoform X2                  | 6 178082527 178453688  | 0.115334              | 1.67             | 0.219574              | 1.94             | 0.451729              | 1.35             |
| LOC102143601 | anthrax toxin receptor-like                               | 9 48260325 48265477    | 0.115347              | 13.62            | 1.000000              | 6.63             | 1.000000              | -5.49            |
| LOC107131039 | Ig lambda chain V region 4A-like                          | 10 29164130 29164606   | 0.115347              | 4.25             | 0.282103              | 3.75             | 0.567870              | 1.39             |
| RNFR         | ciliary neurotrophic factor receptor subunit 1            | 15 44558627 44583659   | 0.115347              | 1.74             | 0.767733              | 1.26             | 0.939361              | 1.04             |
| RHOA         | uncharacterized protein LOC101865630                      | 2 104550600 104599834  | 0.115347              | -1.14            | 0.822309              | 1.04             | 0.254668              | -1.12            |
| NT5C3A       | cytosolic 5'-nucleotidase 3A isoform X1                   | 3 87520067 87568751    | 0.115376              | -1.24            | 0.575340              | 1.16             | 0.299583              | 1.18             |
| ZBTB33       | transcriptional regulator Kaiso                           | X 116931106 116933124  | 0.115443              | -1.44            | 0.608322              | 1.26             | 0.249703              | 1.36             |
| TAB1         | TGF-beta-activated kinase 1 and MAP3K1                    | 10 11758335 11792360   | 0.115635              | 1.17             | 0.768039              | -1.07            | 0.911163              | -1.02            |
| ZC3H15       | uncharacterized protein LOC101925486                      | 12 75526797 75549403   | 0.115746              | -1.33            | 0.458135              | 1.27             | 0.454831              | 1.17             |
| ZNF528       | zinc finger protein 528 isoform X1                        | 19 53116152 53130659   | 0.115907              | 1.19             | 0.652908              | 1.11             | 0.458051              | -1.11            |
| SPRNT        | sprT-like domain-containing protein Sprnt                 | 1 18204246 18219125    | 0.115907              | -1.29            | 0.643263              | 1.16             | 0.108147              | 1.33             |
| LOC107126415 | olfactory receptor 4A15                                   | 14 17353849 17354802   | 0.115907              | -4.96            | 0.087087              | 28.87            | 0.003074              | -35.96           |
| ZNF57        | zinc finger protein 57 isoform X1                         | 19 2841077 2870036     | 0.115955              | -1.22            | 0.310316              | -1.24            | 0.369021              | -1.14            |
| KIAA0101     | PCNA-associated factor isoform X2                         | 7 41801096 41820017    | 0.116095              | -1.75            | 0.660928              | -1.37            | 0.806846              | 1.13             |
| SENP2        | sentrin-specific protease 2 isoform X2                    | 2 90310222 90357136    | 0.116237              | 1.14             | 0.846643              | -1.04            | 0.331686              | 1.10             |
| LOC102130839 | cytochrome P450 4F12-like                                 | 19 15969741 15986891   | 0.116356              | 5.17             | 1.000000              | -1.60            | 0.235866              | -3.62            |
| PLCG1        | 1-phosphatidylinositol 4,5-bisphosphate phosphatase 1     | 10 72773860 72810877   | 0.116394              | 1.32             | 0.918326              | -1.05            | 0.938718              | -1.02            |
| MUC15        | mucin-15                                                  | 14 40932317 40937056   | 0.116460              | 2.53             | 0.914234              | 1.18             | 0.424202              | -1.77            |
| CRYZ         | quinone oxidoreductase                                    | 1 152543512 152562399  | 0.116460              | -1.29            | 0.747179              | 1.12             | 0.274299              | 1.23             |
| DUOX2        | dual oxidase 2                                            | 7 22007089 22026145    | 0.116651              | 7.09             | 0.959668              | 1.18             | 0.118738              | -7.01            |
| PIM2         | uncharacterized protein LOC101864924                      | X 47443454 47447832    | 0.116651              | 1.67             | 0.936886              | 1.07             | 0.962947              | -1.02            |
| PSMD14       | proteasome (prosome, macropain) 26S subunit 14            | 12 50037240 50136095   | 0.116651              | -1.34            | 0.791347              | -1.12            | 0.624738              | 1.12             |
| OASL         | 2'-5'-oligoadenylate synthase-like protein 1              | 11 124979721 124998201 | 0.116651              | -1.67            | 0.948945              | 1.06             | 0.651411              | 1.21             |
| C12H2orf47   | uncharacterized protein C2orf47 homolog 2                 | 12 89156479 89164775   | 0.116715              | -1.19            | 0.875953              | -1.04            | 0.629393              | -1.07            |
| GPT2         | alanine aminotransferase 2 isoform X1                     | 20 34565027 34610309   | 0.116843              | 1.72             | 0.390027              | -1.71            | 0.366199              | 1.45             |
| GJD3         | gap junction delta-3 protein                              | 16 52012831 52013712   | 0.116843              | 1.41             | 0.480028              | 1.33             | 0.243201              | 1.35             |
| FAM172A      | protein FAM172A isoform X8                                | 6 92034496 92478448    | 0.116843              | -1.29            | 0.184658              | 1.42             | 0.214327              | 1.26             |
| RHBDD2       | rhomboid domain-containing protein 2 isoform X1           | 3 47480127 47489495    | 0.116886              | 1.28             | 0.589854              | -1.18            | 0.536513              | -1.13            |
| MIER1        | mesoderm induction early response protein 1               | 1 160374568 160436250  | 0.116886              | -1.38            | 0.265374              | 1.47             | 0.380188              | 1.24             |
| LOC102117528 |                                                           | 15 65633020 65646207   | 0.116910              | 8.17             | 1.000000              | 1.00             | 1.000000              | -3.79            |
| NADK2        | NAD kinase 2, mitochondrial isoform X3                    | 6 36602823 36645759    | 0.116910              | -1.33            | 0.469422              | 1.27             | 0.530836              | 1.15             |
| LOC107129707 |                                                           | 5 14757698 14772671    | 0.116910              | -1.62            | 0.557811              | -1.41            | 0.966592              | -1.02            |
| LOC102141014 | putative serine protease 29                               | 20 1249995 1252009     | 0.116922              | 4.20             | 0.566235              | -2.74            | 0.923819              | -1.13            |
| MFAP4        | microfibril-associated glycoprotein 4 isoform X1          | 16 19376286 19378978   | 0.116922              | 1.71             | 0.140985              | 2.22             | 0.759199              | 1.15             |
| LOC107129565 |                                                           | 4 136532164 136570706  | 0.116922              | -1.45            | 0.890289              | -1.09            | 0.144596              | -1.47            |
| SLC9B1       | sodium/hydrogen exchanger 9B1 isoform X1                  | 5 102211837 102340321  | 0.116922              | -1.91            | 0.692200              | -1.42            | 0.117711              | -2.12            |
| LOC102145131 |                                                           | 2 164947398 165072179  | 0.116922              | -2.20            | 0.968117              | -1.06            | 0.457935              | -1.53            |
| DEAF1        | deformed epidermal autoregulatory factor 1                | 14 471355 521465       | 0.116933              | 1.24             | 0.171751              | -1.35            | 0.460375              | -1.13            |
| QRFRP        | pyroglutamylated Rfamid peptide receptor 1                | 5 120308856 120364153  | 0.116933              | -2.57            | 0.519426              | 2.18             | 0.538806              | -1.70            |
| TEX28        | testis-specific protein TEX28                             | X 151168602 151189263  | 0.116950              | -7.43            | 0.696010              | 3.26             | 0.095553              | -14.86           |
| IFB30        | gamma-interferon-inducible lysosomal thiol reductase 30   | 19 18559233 18563626   | 0.117097              | -1.50            | 0.268192              | -1.62            | 0.624776              | -1.17            |
| CAMKK2       | calcium/calmodulin-dependent protein kinase II isoform X1 | 11 125241169 125277526 | 0.117168              | 1.15             | 0.075514              | 1.28             | 0.969193              | 1.01             |
| LOC107129714 |                                                           | 5 32695103 32706018    | 0.117211              | 5.68             | 1.000000              | 9.67             | 0.723481              | 1.49             |
| PRDX2        | peroxiredoxin 2                                           | 19 13018051 13022713   | 0.117211              | 1.21             | 0.149463              | -1.32            | 0.090514              | -1.24            |



| Gene symbol  | Gene name                                      | chr_start_end          | Day3 adjusted P-value | Day3 fold change | Day5 adjusted P-value | Day5 fold change | Day7 adjusted P-value | Day7 fold change |
|--------------|------------------------------------------------|------------------------|-----------------------|------------------|-----------------------|------------------|-----------------------|------------------|
| SULT2B1      | sulfotransferase family cytosolic 2B mem       | 19 49384580 49431141   | 0.117400              | -1.58            | 0.612103              | 1.35             | 0.247301              | -1.49            |
| HDHD3        | haloacid dehalogenase-like hydrolase dom       | 15 24200640 24201395   | 0.117481              | -1.30            | 0.155395              | -1.46            | 0.951198              | 1.02             |
| VIPR2        | vasoactive intestinal polypeptide receptor     | 3 191977200 192087609  | 0.117493              | 3.80             | 0.399747              | 3.57             | 0.699781              | -1.52            |
| SLC25A40     | solute carrier family 25 member 40 isoform     | 3 124195503 124217559  | 0.117493              | -1.43            | 0.479791              | 1.34             | 0.416031              | 1.25             |
| C6H5orf24    | UPF0461 protein C5orf24 homolog isofo          | 6 133928267 133930759  | 0.117493              | -1.48            | 0.224480              | 1.66             | 0.332584              | 1.33             |
| LGMN         | legumain                                       | 7 157697080 157725826  | 0.117564              | -1.61            | 0.284079              | -1.74            | 0.464337              | -1.31            |
| LOC102117850 |                                                | 12 19646493 19649767   | 0.117623              | 2.20             | 0.047644              | 6.58             | 0.161653              | -2.60            |
| NUDT18       | LOW QUALITY PROTEIN: 8-oxo-dGD                 | 8 22243929 22252163    | 0.117634              | -1.30            | 0.888754              | -1.06            | 0.935262              | -1.02            |
| PTPRZ1       | receptor-type tyrosine-protein phosphatase     | 3 154652169 154848499  | 0.117744              | 2.37             | 0.724486              | -1.52            | 0.215013              | -2.23            |
| PDE9A        | high affinity cGMP-specific 3',5'-cyclic pl    | 3 3987260 4115159      | 0.117744              | 1.62             | 0.893543              | 1.11             | 0.495554              | -1.29            |
| PLEKHH1      | pleckstrin homology domain-containing f        | 7 132062714 132108499  | 0.117744              | 1.47             | 0.138327              | -1.73            | 0.509031              | 1.20             |
| GRIK5        | glutamate receptor ionotropic, kainate 5 is    | 19 42499732 42585090   | 0.117744              | 1.30             | 0.000375              | -2.15            | 0.139423              | -1.32            |
| LOC101867133 | uncharacterized protein LOC101867133           | 11 128072617 128093095 | 0.117790              | -1.23            | 0.510828              | 1.18             | 0.517200              | -1.11            |
| CD22         | B-cell receptor CD22 isoform X1                | 19 35794610 35808461   | 0.117887              | 1.44             | 0.919352              | 1.07             | 0.447502              | 1.24             |
| LOC102125480 | LOW QUALITY PROTEIN: zinc finger p             | 20 29324407 29324958   | 0.118082              | 1.60             | 0.619074              | -1.35            | 0.310524              | -1.45            |
| FOXO4        | forkhead box protein O4                        | X 68095940 68102207    | 0.118082              | 1.41             | 0.566217              | 1.27             | 0.477968              | -1.21            |
| SCARF2       | scavenger receptor class F member 2            | 10 30971614 30984559   | 0.118185              | 1.30             | 0.774694              | 1.11             | 0.255674              | 1.25             |
| ARF6         | ADP-ribosylation factor 6                      | 7 114102804 114103331  | 0.118185              | -1.27            | 0.733606              | 1.12             | 0.660406              | 1.09             |
| LOC102146589 | putative golgin subfamily A member 6C i        | 7 57088741 57111761    | 0.118197              | -2.54            | 0.298814              | -2.66            | 0.278634              | -1.97            |
| SERPINB11    | serpin B11 isoform X2                          | 18 16620157 16633363   | 0.118207              | 6.26             | 0.928305              | 1.33             | 0.826923              | -1.42            |
| LOC102140357 |                                                | 3 138333110 138364815  | 0.118207              | 1.98             | 0.472918              | 1.77             | 0.033381              | -2.76            |
| LOC102123710 | uncharacterized protein LOC102123710           | 16 18739037 18739972   | 0.118335              | 2.45             | 0.002080              | -62.30           | 0.340794              | 1.98             |
| NAT14        | N-acetyltransferase 14                         | 19 56332191 56332739   | 0.118579              | 1.66             | 0.622958              | -1.37            | 0.173916              | -1.64            |
| TFDP2        | transcription factor Dp-2 isoform X4           | 2 44083022 44230257    | 0.118735              | 1.34             | 0.678861              | -1.17            | 0.807605              | -1.06            |
| DPY19L1      | probable C-mannosyltransferase DPY19L          | 3 85488116 85574984    | 0.118735              | -1.30            | 0.302541              | 1.35             | 0.334241              | 1.21             |
| MYO1C        | unconventional myosin-1c isoform X3            | 16 1336880 1366753     | 0.118750              | 1.31             | 0.255521              | 1.39             | 0.821301              | 1.06             |
| IKZF4        | zinc finger protein Eos isoform X2             | 11 54928314 54945588   | 0.118750              | 1.19             | 0.792304              | -1.07            | 0.366096              | 1.13             |
| LOC102129308 | T-cell receptor beta chain V region CTL-I      | 3 175492955 175493740  | 0.118750              | -1.62            | 0.612583              | -1.36            | 0.967947              | -1.02            |
| RNF39        | RING finger protein 39                         | 4 140882397 140887078  | 0.118750              | 1.51             | 0.764573              | 1.19             | 0.000078              | -2.56            |
| SPINK5       | serine protease inhibitor Kazal-type 5 isoform | 6 147305830 147379463  | 0.119113              | 12.63            | 1.000000              | -3.92            | 0.990516              | -1.03            |
| NCKAP5       | nck-associated protein 5 isoform X1            | 12 19055600 19892544   | 0.119113              | 1.96             | 0.358519              | 2.00             | 0.813728              | 1.15             |
| PTPN13       | tyrosine-protein phosphatase non-receptor      | 5 85712915 85897572    | 0.119113              | -1.31            | 0.001155              | -2.08            | 0.167225              | 1.31             |
| CCDC138      | coiled-coil domain-containing protein 138      | 13 13317569 13411464   | 0.119134              | -1.58            | 0.231342              | 1.79             | 0.623647              | 1.20             |
| CTNND1       | catenin delta-1 isoform X6                     | 14 15785673 15812935   | 0.119187              | 1.17             | 0.647096              | 1.09             | 0.265925              | 1.13             |
| CSNK1A1      | casein kinase I isoform alpha isoform X8       | 6 148826551 148882695  | 0.119306              | -1.23            | 0.567026              | 1.16             | 0.654569              | 1.08             |
| DCBLD1       | discoidin, CUB and LCCL domain-contain         | 4 21463036 21528472    | 0.119444              | -1.32            | 0.934798              | -1.04            | 0.567317              | 1.14             |
| LOC102119036 |                                                | 2 74159803 74168793    | 0.119444              | -1.58            | 0.055215              | 2.37             | 0.439011              | -1.31            |
| LRRC18       | leucine-rich repeat-containing protein 18      | 9 46134789 46138738    | 0.119506              | 2.19             | 0.923964              | 1.14             | 0.731138              | 1.26             |
| GMEB1        | glucocorticoid modulatory element-bindin       | 1 199422373 199467017  | 0.119533              | 1.27             | 0.736979              | -1.12            | 0.442221              | 1.16             |
| DNM1L        | dynamins-like protein isoform X1               | 11 33254601 33318645   | 0.119813              | -1.21            | 0.601300              | 1.14             | 0.400485              | 1.13             |
| AVIL         | advillin isoform X2                            | 11 56793918 56812758   | 0.119819              | 1.55             | 0.817061              | 1.17             | 0.071481              | 1.73             |
| CFAP65       | coiled-coil domain-containing protein 108      | 12 108687696 108724842 | 0.119872              | 5.78             | 0.992863              | -1.03            | 0.563394              | -2.27            |
| SNX29        | sorting nexin-29 isoform X1                    | 20 12293626 12889733   | 0.119872              | 1.24             | 0.501468              | 1.19             | 0.320312              | -1.18            |
| ECT2         | protein ECT2 isoform X3                        | 2 77018301 77084207    | 0.119872              | -1.71            | 0.874543              | -1.15            | 0.564870              | 1.28             |
| ADAM19       | disintegrin and metalloproteinase domain-      | 6 156872575 156969488  | 0.120072              | 1.68             | 0.915207              | -1.10            | 0.217075              | 1.60             |
| PRELID3B     | PRELI domain containing protein 3B             | 10 90929165 90932779   | 0.120072              | -1.35            | 0.755091              | 1.14             | 0.593831              | 1.14             |
| RAB10        | ras-related protein Rab-10                     | 13 84742733 84850263   | 0.120072              | -1.43            | 0.689897              | 1.21             | 0.656938              | 1.14             |
| GALNT1       | polypeptide N-acetylgalactosaminyltransf       | 18 46294833 46351251   | 0.120072              | -1.44            | 0.990701              | 1.01             | 0.634810              | 1.15             |
| SYNPO        | synaptopodin isoform X1                        | 6 149961981 150003158  | 0.120110              | 1.27             | 0.152830              | 1.43             | 0.902315              | -1.03            |
| STXBP1       | syntaxin-binding protein 1 isoform X2          | 15 101083070 101164790 | 0.120151              | 1.20             | 0.139778              | -1.31            | 0.378875              | -1.13            |
| ANKRD12      | ankyrin repeat domain-containing protein       | 18 70356768 70450775   | 0.120151              | -1.31            | 0.419652              | 1.28             | 0.617761              | 1.11             |
| MMGT1        | membrane magnesium transporter 1               | X 132723222 132732652  | 0.120154              | -1.27            | 0.307913              | 1.31             | 0.773869              | 1.06             |
| IDE          | insulin-degrading enzyme isoform X2            | 9 90951153 91059297    | 0.120224              | -1.24            | 0.744956              | 1.10             | 0.790607              | 1.05             |
| BRCC3        | lys-63-specific deubiquitinase BRCC36 is       | X 151964749 152001069  | 0.120240              | -1.16            | 0.264775              | -1.19            | 0.324994              | 1.12             |
| DENND6A      | protein DENND6A isoform X3                     | 2 112919379 113006261  | 0.120269              | -1.30            | 0.233369              | 1.39             | 0.187585              | 1.28             |
| LOC102127289 | proline-rich protein 33-like                   | 14 1859036 1860451     | 0.120347              | -2.89            | 0.857590              | -1.33            | 0.973235              | 1.04             |
| TMEM69       | transmembrane protein 69                       | 1 181836062 181839187  | 0.120418              | -1.36            | 0.775051              | 1.14             | 0.589759              | 1.14             |
| LOC102129655 |                                                | 5 1393649 1397492      | 0.120756              | -1.26            | 0.430881              | 1.25             | 0.077697              | 1.34             |
| C2H3orf52    | TPA-induced transmembrane protein              | 2 160076844 160107853  | 0.120794              | -1.37            | 0.765963              | -1.14            | 0.954188              | 1.02             |
| IL1RN        | interleukin-1 receptor antagonist protein is   | 13 17266591 17281107   | 0.120794              | -1.39            | 0.392726              | 1.37             | 0.346606              | -1.26            |
| TAP1         | antigen peptide transporter 1                  | 4 137976843 137984464  | 0.120877              | 1.26             | 0.960120              | 1.02             | 0.071591              | 1.33             |
| LOC102136286 |                                                | 2 95185661 95253339    | 0.120877              | -1.49            | 0.199469              | -1.76            | 0.557252              | 1.21             |
| CEP104       | centrosomal protein of 104 kDa isoform X       | 1 224611214 224649443  | 0.120899              | 1.13             | 0.986000              | -1.00            | 0.694970              | -1.04            |
| SCN2B        | sodium channel subunit beta-2 isoform X        | 14 114144658 114154280 | 0.120989              | 1.72             | 0.862375              | 1.16             | 0.791267              | 1.13             |
| NNMT         | nicotinamide N-methyltransferase               | 14 110322969 110339077 | 0.120999              | -1.96            | 0.080646              | 3.24             | 0.764458              | 1.19             |
| IL6R         | interleukin-6 receptor subunit alpha isofo     | 1 97355890 97415860    | 0.121044              | 1.20             | 0.763245              | 1.08             | 0.011233              | 1.34             |
| CFAP52       | cilia- and flagella-associated protein 52 is   | 16 9731215 9805777     | 0.121057              | -1.31            | 0.602073              | -1.19            | 0.892587              | 1.03             |
| AICDA        | single-stranded DNA cytosine deaminase         | 11 8890977 8899397     | 0.121123              | 5.80             | 1.000000              | -4.81            | 0.895007              | -1.21            |
| CXHXorf56    | UPF0428 protein CXorf56 homolog                | X 116244348 116269122  | 0.121123              | 1.31             | 0.966616              | -1.02            | 0.444015              | -1.17            |
| USH1C        | harmonin isoform X2                            | 14 50184223 50233967   | 0.121170              | 2.52             | 0.057545              | 5.38             | 0.679422              | 1.37             |
| LOC102146012 | leucine-rich repeat extensin-like protein 5    | 19 18668564 18673995   | 0.121281              | -1.63            | 0.352060              | -1.66            | 0.148820              | -1.65            |
| SEC14L3      | SEC14-like protein 3 isoform X2                | 10 20985823 20997914   | 0.121440              | 4.40             | 0.369151              | 4.49             | 0.432132              | -2.45            |
| LOC102127136 | Ig kappa chain V-III region VG-like            | 13 18868913 18869645   | 0.121440              | 2.33             | 0.628642              | 1.63             | 0.915152              | -1.08            |
| LOC102129741 | mitogen-activated protein kinase kinase ki     | 1 16204377 16256618    | 0.121440              | -1.39            | 0.541281              | 1.27             | 0.348774              | 1.26             |
| RNF34        | E3 ubiquitin-protein ligase RNF34 isoform      | 11 125410588 125436005 | 0.121702              | -1.14            | 0.566219              | -1.10            | 0.983852              | 1.00             |
| C1QTNF9      | complement C1q and tumor necrosis facto        | 17 4638530 4644317     | 0.121774              | 1.86             | 0.351999              | -1.90            | 0.000224              | -3.75            |
| GDPD5        | glycerophosphodiester phosphodiesterase        | 14 70745233 70786519   | 0.121804              | 1.65             | 0.937480              | 1.07             | 0.513865              | -1.29            |
| SEMA6A       | semaphorin-6A isoform X3                       | 6 115396817 115457016  | 0.121826              | 1.64             | 0.248609              | 1.84             | 0.807312              | -1.11            |
| SLC9A2       | sodium/hydrogen exchanger 2 isoform X1         | 13 6979349 7068627     | 0.122022              | 2.58             | 0.635207              | 1.87             | 0.077471              | -3.63            |
| MYO3B        | myosin-IIIB                                    | 12 59036422 59578564   | 0.122022              | 1.73             | 0.187260              | 2.26             | 0.000004              | -4.08            |
| LOC102147047 |                                                | 12_131491388 131513196 | 0.122022              | 1.67             | 0.919141              | 1.09             | 0.219277              | 1.59             |
| KANSL3       | KAT8 regulatory NSL complex subunit 3          | 13 1287174 1372385     | 0.122022              | 1.19             | 0.944909              | -1.02            | 0.294281              | -1.15            |
| RPL26L1      | 60S ribosomal protein L26-like 1               | 6 17260514 172613244   | 0.122022              | -1.19            | 0.012043              | -1.49            | 0.678379              | -1.06            |
| NUDT13       | nucleoside diphosphate-linked moiety X n       | 9 62410630 62447559    | 0.122022              | -1.25            | 0.781775              | 1.09             | 0.173736              | -1.25            |
| LOC102124317 | histone H2A type 1-C                           | 4 144450193 144450585  | 0.122043              | -1.31            | 0.337135              | 1.33             | 0.167502              | 1.31             |
| C1GALT1C1    | C1GALT1-specific chaperone 1                   | X 117303024 117303980  | 0.122485              | -1.18            | 0.800876              | 1.06             | 0.341177              | 1.23             |
| SEMA3G       | semaphorin-3G                                  | 2 107715172 107726441  | 0.122743              | 1.87             | 0.276040              | 2.10             | 0.563105              | 1.34             |

| Gene symbol  | Gene name                                                            | chr_start_end          | Day3 adjusted P-value | Day3 fold change | Day5 adjusted P-value | Day5 fold change | Day7 adjusted P-value | Day7 fold change |
|--------------|----------------------------------------------------------------------|------------------------|-----------------------|------------------|-----------------------|------------------|-----------------------|------------------|
| CDK5R1       | cyclin-dependent kinase 5 activator 1 isoform 1                      | 16 28867797 28869737   | 0.122981              | 1.27             | 0.925561              | 1.04             | 0.320813              | 1.20             |
| ANKIB1       | ankyrin repeat and IBR domain-containing protein 1                   | 3 119603832 119686666  | 0.122992              | -1.29            | 0.676324              | 1.15             | 0.184160              | 1.28             |
| FAM171A2     | protein FAM171A2                                                     | 16 56152487 56161609   | 0.123130              | 1.44             | 0.144842              | -1.68            | 0.100093              | 1.48             |
| NRDE2        | protein NRDE2 homolog isoform X1                                     | 7 155224592 155275221  | 0.123232              | 1.19             | 0.616626              | -1.11            | 0.978257              | 1.00             |
| ZMYM1        | zinc finger MYM-type protein 1 isoform 1                             | 1 192793766 192816967  | 0.123318              | -1.39            | 0.105010              | 1.71             | 0.139423              | 1.43             |
| LOC102146679 |                                                                      | 19 30399 33935         | 0.123475              | 6.13             | 1.000000              | 2.18             | 0.606800              | -1.93            |
| LOC102138541 | collagen alpha-1(X) chain-like                                       | 1 79668846 79669343    | 0.123565              | 1.79             | 0.621380              | 1.45             | 0.451870              | -1.41            |
| UNC45B       | protein unc-45 homolog B                                             | 16 31537991 31575598   | 0.123673              | 2.41             | 0.073984              | 4.99             | 0.801674              | 1.22             |
| CAPZA1       | F-actin-capping protein subunit alpha-1 isoform 1                    | 1 114122736 114171042  | 0.123673              | -1.34            | 0.900320              | 1.06             | 0.352281              | 1.23             |
| LOC107129231 |                                                                      | 3 94268532 94319934    | 0.123673              | -1.83            | 0.576398              | -1.77            | 0.549616              | -1.49            |
| DLG5         | disks large homolog 5 isoform X1                                     | 9 57749968 57827569    | 0.123676              | 1.29             | 0.645485              | -1.16            | 0.561590              | 1.12             |
| FRZB         | secreted frizzled-related protein 3                                  | 12 71840782 71872313   | 0.123701              | 1.98             | 0.030023              | 4.00             | 0.612012              | -1.32            |
| LOC107127959 |                                                                      | 17 30498148 30536303   | 0.123729              | 2.71             | 0.735919              | -1.50            | 0.409708              | 1.79             |
| GABPB2       | GA-binding protein subunit beta-2 isoform 1                          | 1 100876859 100925005  | 0.123898              | 1.32             | 0.464675              | 1.27             | 0.522544              | -1.15            |
| SNX33        | sorting nexin-33                                                     | 7 53840776 53848964    | 0.123898              | 1.27             | 0.833275              | -1.08            | 0.313997              | -1.20            |
| LOC102147067 | histone H3.3-like                                                    | 14 120156174 120156584 | 0.123937              | 1.23             | 0.724454              | -1.11            | 0.572727              | 1.10             |
| ALG8         | probable dolichyl pyrophosphate Glc1ManNAc transferase 8             | 14 73463138 73500896   | 0.124000              | -1.34            | 0.872336              | 1.08             | 0.917700              | -1.03            |
| LRRC74B      | leucine-rich repeat-containing protein 74B                           | 10 30647086 30662315   | 0.124042              | 4.98             | 0.842721              | -1.99            | 0.585283              | -2.23            |
| LIN54        | protein lin-54 homolog isoform X1                                    | 5 51412785 51496894    | 0.124181              | -1.34            | 0.761276              | 1.14             | 0.165817              | 1.35             |
| MYOG         | myogenin                                                             | 1 61541180 61543291    | 0.124303              | -3.79            | 0.980772              | -1.06            | 0.186110              | -3.70            |
| TFEC         | transcription factor EC isoform X2                                   | 3 148482836 148635789  | 0.124441              | -1.49            | 0.929188              | -1.06            | 0.560487              | 1.20             |
| LOC107127165 |                                                                      | 13 92447145 92612388   | 0.124441              | 5.25             | 0.986184              | -1.07            | 0.043496              | -10.11           |
| LOC107127429 |                                                                      | 14 107268513 107271046 | 0.124596              | 1.68             | 0.046324              | -2.60            | 0.913941              | -1.05            |
| RPTOR        | regulatory-associated protein of mTOR isoform 1                      | 16 78118444 78539664   | 0.124596              | 1.14             | 0.872158              | -1.03            | 0.921476              | 1.01             |
| PHF6         | PHD finger protein 6 isoform X1                                      | X 131293657 131341582  | 0.124596              | -1.52            | 0.449048              | 1.45             | 0.387353              | 1.32             |
| FUK          | L-fucose kinase isoform X3                                           | 20 62159563 62177397   | 0.124770              | 1.40             | 0.577449              | -1.26            | 0.092702              | -1.49            |
| CACFD1       | calcium channel flower homolog isoform 1                             | 15 5193523 5202551     | 0.124770              | -1.28            | 0.016230              | -1.72            | 0.341788              | -1.19            |
| C4H6orf120   | UPF0669 protein C6orf120 homolog                                     | 4 1034866 1035726      | 0.124782              | -1.35            | 0.321766              | 1.39             | 0.402860              | 1.21             |
| GTPBP3       | tRNA modification GTPase GTPBP3, mitochondrial                       | 19 17661756 17669074   | 0.124814              | 1.26             | 0.938898              | 1.03             | 0.319399              | 1.20             |
| ERCC2        | TFIIH basal transcription factor complex 1                           | 19 46123199 46153903   | 0.124814              | 1.23             | 0.063227              | -1.46            | 0.255895              | -1.19            |
| ZFYVE19      | LOW QUALITY PROTEIN: abscission/Nucleo-1                             | 7 17670260 17677189    | 0.124814              | -1.31            | 0.681923              | -1.16            | 0.137330              | -1.33            |
| SEMA4G       | semaphorin-4G isoform X1                                             | 9 99920066 99931653    | 0.124866              | 1.44             | 0.122077              | -1.73            | 0.571853              | -1.18            |
| SPPLC2       | serine palmitoyltransferase 2                                        | 7 142257334 142367254  | 0.124866              | 1.35             | 0.493075              | 1.28             | 0.445710              | 1.20             |
| AR           | androgen receptor                                                    | X 64484790 64648431    | 0.124978              | 1.83             | 0.982409              | -1.02            | 0.666159              | 1.24             |
| PHC1         | polyhomeotic-like protein 1 isoform X1                               | 11 9205503 9228351     | 0.124978              | 1.23             | 0.582575              | -1.15            | 0.896263              | -1.03            |
| LOC102140139 | Ig kappa chain V-II region TEW-like                                  | 13 18220521 18221344   | 0.124986              | 3.64             | 0.949931              | -1.14            | 0.529020              | 1.75             |
| LOC102134301 | phytylquinone omega-hydroxylase CYP4B1                               | 19 16140555 16158704   | 0.125026              | 2.78             | 0.919838              | 1.18             | 0.004894              | 5.72             |
| TRIM54       | tripartite motif-containing protein 54 isoform 1                     | 13 83552126 83576162   | 0.125026              | 2.61             | 0.954800              | 1.13             | 0.759528              | 1.25             |
| NCALD        | neurocalcin-delta isoform X1                                         | 8 102830981 102858086  | 0.125026              | 1.64             | 0.493722              | 1.50             | 0.958003              | 1.03             |
| LOC102145189 | protocadherin beta-7                                                 | 6 140300786 140303173  | 0.125026              | 1.46             | 0.922796              | 1.07             | 0.095093              | 1.56             |
| ST8SIA6      | alpha-2,8-sialyltransferase 8F                                       | 9 17874151 17884741    | 0.125026              | 1.27             | 0.941408              | -1.03            | 0.939484              | 1.02             |
| GAS8         | growth arrest-specific protein 8 isoform X1                          | 20 78472912 78500734   | 0.125026              | 1.20             | 0.607490              | -1.13            | 0.972620              | -1.01            |
| ITGB1BP1     | integrin beta-1-binding protein 1                                    | 13 101594244 101606315 | 0.125026              | -1.14            | 0.980154              | 1.01             | 0.685453              | -1.05            |
| AK6          | adenylate kinase isoenzyme 6                                         | 6 69189841 69211329    | 0.125026              | -1.25            | 0.890126              | 1.05             | 0.756369              | 1.06             |
| ARPC5        | uncharacterized protein LOC101866570                                 | 1 41588007 41596059    | 0.125026              | -1.39            | 0.859958              | 1.10             | 0.525839              | 1.18             |
| LOC107129096 |                                                                      | 3 33566349 33594558    | 0.125026              | -1.97            | 0.863478              | -1.20            | 0.040909              | -2.55            |
| LOC107128091 |                                                                      | 18 74115335 74119268   | 0.125026              | -5.16            | 1.000000              | 1.88             | 0.627960              | -1.76            |
| SCNN1G       | amiloride-sensitive sodium channel subunit 1                         | 20 22098435 22130326   | 0.125036              | -1.29            | 0.019273              | 1.72             | 0.978587              | -1.01            |
| ACKR2        | atypical chemokine receptor 2                                        | 2 97794682 97795836    | 0.125064              | 1.72             | 0.568641              | 1.47             | 0.935670              | 1.04             |
| CELF1        | CUGBP Elav-like family member 1 isoform 1                            | 14 20041236 20071449   | 0.125064              | -1.22            | 0.484821              | 1.18             | 0.926941              | 1.02             |
| ZBTB39       | zinc finger and BTB domain-containing protein 39                     | 11 55954286 55956424   | 0.125103              | 1.20             | 0.947458              | 1.02             | 0.094298              | 1.24             |
| SPNS2        | protein spinster homolog 2                                           | 16 4512788 4552805     | 0.125188              | 1.34             | 0.813035              | -1.11            | 0.185636              | -1.33            |
| TAPBP        | tapasin isoform X2                                                   | 4 137470847 137483401  | 0.125257              | 1.31             | 0.984500              | -1.01            | 0.043554              | 1.45             |
| PURA         | transcriptional activator protein Pur-alpha                          | 6 139249912 139252484  | 0.125301              | -1.22            | 0.234427              | 1.30             | 0.059616              | 1.30             |
| CCDC28B      | coiled-coil domain-containing protein 28B                            | 1 195807943 195812601  | 0.125304              | 1.39             | 0.277480              | -1.49            | 0.067648              | 1.51             |
| TEX14        | inactive serine/threonine-protein kinase TLK1                        | 16 44078747 44201435   | 0.125304              | 1.32             | 0.407774              | -1.29            | 0.216341              | -1.28            |
| ZFYVE9       | zinc finger FYVE domain-containing protein 9                         | 1 175170336 175296533  | 0.125304              | 1.24             | 0.452878              | 1.21             | 0.835697              | -1.04            |
| NAA60        | N-alpha-acetyltransferase 60 isoform X1                              | 20 3728450 3737669     | 0.125304              | 1.15             | 0.811321              | -1.05            | 0.941288              | -1.01            |
| 5-Mar        | #N/A                                                                 | #N/A                   | 0.125304              | -1.36            | 0.659552              | 1.19             | 0.455298              | 1.19             |
| SETD9        | SET domain-containing protein 9 isoform 1                            | 6 56387326 56416824    | 0.125422              | -1.26            | 0.781393              | -1.10            | 0.679130              | 1.09             |
| AIDA         | axin interactor, dorsalization-associated protein 1                  | 1 81510705 81551611    | 0.125515              | -1.23            | 0.174953              | 1.34             | 0.310446              | 1.17             |
| PRUNE2       | protein prune homolog 2 isoform X3                                   | 15 87390934 87681794   | 0.125552              | -1.74            | 0.001036              | 4.70             | 0.016625              | -2.38            |
| LOC102117707 | 25-hydroxyvitamin D-1 alpha hydroxylase                              | 11 56760425 56764294   | 0.125598              | -1.68            | 0.672461              | -1.35            | 0.537439              | -1.30            |
| LOC102131217 | poliovirus receptor homolog isoform X1                               | 19 45306094 45312535   | 0.125624              | -1.35            | 0.963542              | 1.03             | 0.052417              | -1.49            |
| LOC102131088 |                                                                      | 19 48822106 48827210   | 0.125781              | -2.89            | 0.630763              | 1.87             | 0.683166              | -1.42            |
| LOC107130489 |                                                                      | 1 197868245 197878463  | 0.125823              | 6.26             | 1.000000              | 5.23             | 0.274868              | 3.44             |
| ADH7         | alcohol dehydrogenase class 4 mu/sigma class 4                       | 5 98709395 98727740    | 0.126009              | 1.82             | 0.973217              | 1.04             | 0.904471              | 1.07             |
| LRGUK        | leucine-rich repeat and guanylate kinase domain-containing protein 1 | 3 166960863 167092246  | 0.126009              | 1.81             | 0.846842              | -1.22            | 0.200447              | -1.81            |
| NCOA6        | nuclear receptor coactivator 6 isoform X4                            | 10 66133917 66205948   | 0.126009              | 1.15             | 0.991759              | -1.00            | 0.917055              | -1.01            |
| TMEM128      | transmembrane protein 128                                            | 5 8778877 8789386      | 0.126009              | -1.20            | 0.216611              | 1.28             | 0.071591              | 1.26             |
| ZNF22        | zinc finger protein 22                                               | 9 43653083 43653757    | 0.126073              | -1.26            | 0.503576              | 1.20             | 0.187678              | 1.25             |
| FGFR4        | fibroblast growth factor receptor 4 isoform 1                        | 6 176887684 176895602  | 0.126275              | 1.86             | 0.655084              | 1.44             | 0.800089              | -1.15            |
| LOC107127536 | sperm head and tail associated protein-like 1                        | 1 181148887 181151181  | 0.126320              | 2.18             | 0.541939              | 2.04             | 0.525381              | 1.53             |
| SLC52A1      | solute carrier family 52, riboflavin transporter 1                   | 16 5116773 5118419     | 0.126571              | 1.28             | 0.323485              | -1.31            | 0.439883              | 1.16             |
| IER5L        | immediate early response gene 5-like protein 1                       | 15 9963255 9964936     | 0.126728              | -1.55            | 0.912532              | 1.08             | 0.910296              | 1.05             |
| ARID1A       | AT-rich interactive domain-containing protein 1A                     | 1 201502511 201588055  | 0.126751              | 1.12             | 0.614011              | -1.08            | 0.090787              | 1.15             |
| LOC102121092 | phosphoserine phosphatase-like                                       | 3 64478351 64512692    | 0.126809              | 1.16             | 0.722154              | 1.08             | 0.518082              | 1.08             |
| TNNT3        | tropomyosin T, fast skeletal muscle isoform X1                       | 14 1871640 1886998     | 0.126826              | 1.96             | 0.882728              | 1.22             | 0.624264              | 1.31             |
| EFS          | embryonal Fyn-associated substrate isoform 1                         | 7 87077329 87085220    | 0.126826              | 1.50             | 0.602073              | -1.31            | 0.807000              | -1.09            |
| EIF4E        | eukaryotic translation initiation factor 4E isoform 1                | 5 98099110 98146823    | 0.126826              | -1.42            | 0.456277              | 1.36             | 0.661588              | 1.13             |
| ABCG1        | ATP-binding cassette sub-family G member 1                           | 3 4476231 4552903      | 0.126830              | 1.46             | 0.801728              | 1.15             | 0.591473              | -1.18            |
| SNX15        | sorting nexin-15                                                     | 14 9499767 9512119     | 0.126830              | 1.20             | 0.956172              | 1.02             | 0.109846              | -1.23            |
| C11H1orf122  | uncharacterized protein C11orf122 homolog 1                          | 1 190003238 190003626  | 0.126830              | -1.28            | 0.814522              | -1.09            | 0.329721              | -1.20            |
| C14H1orf65   | uncharacterized protein C11orf65 homolog 1                           | 14 104355431 104491022 | 0.126830              | -2.26            | 0.962413              | 1.07             | 0.877588              | 1.12             |
| LOC107128344 |                                                                      | 20 3926525 3929036     | 0.126830              | 1.84             | 0.696839              | -1.38            | 0.433940              | -1.44            |
| LOC107130440 |                                                                      | 7 133333279 133338916  | 0.126835              | 3.37             | 1.000000              | 1.10             | 0.549369              | 2.16             |
| MKL2         | MKL/myocardin-like protein 2 isoform X1                              | 20 14507782 14659760   | 0.126954              | 1.37             | 0.174605              | 1.57             | 0.657041              | 1.12             |

| Gene symbol  | Gene name                                    | chr_start_end          | Day3 adjusted P-value | Day3 fold change | Day5 adjusted P-value | Day5 fold change | Day7 adjusted P-value | Day7 fold change |
|--------------|----------------------------------------------|------------------------|-----------------------|------------------|-----------------------|------------------|-----------------------|------------------|
| LOC102146448 | WAS/WASL-interacting protein family m        | 7 7916869 7920668      | 0.127032              | 1.96             | 0.349160              | -2.05            | 0.042499              | -2.56            |
| SLC15A1      | solute carrier family 15 member 1            | 17 81304182 81373551   | 0.127132              | -1.63            | 0.034619              | -2.79            | 0.041487              | 2.17             |
| PDZD7        | PDZ domain-containing protein 7 isoform      | 9 99958596 99980935    | 0.127226              | 1.46             | 0.791453              | -1.16            | 0.005738              | -1.93            |
| P2RX2        | P2X purinoceptor 2 isoform X1                | 11 137168159 137171231 | 0.127276              | 2.50             | 0.369087              | 2.60             | 0.864170              | -1.16            |
| PRSS35       | inactive serine protease 35                  | 4 90340796 90342034    | 0.127276              | 1.69             | 0.430354              | 1.62             | 0.330660              | 1.48             |
| LOC102132406 | putative V-set and immunoglobulin doma       | 0 120472 121601        | 0.127389              | 2.33             | 0.773068              | 1.40             | 0.915406              | 1.08             |
| LOC102141548 |                                              | 3 56659980 56673712    | 0.127389              | -1.50            | 0.593839              | 1.32             | 0.294579              | -1.38            |
| TPPP3        | tubulin polymerization-promoting protein     | 20 55545587 55546522   | 0.127564              | 1.92             | 0.925296              | -1.11            | 0.060891              | -2.33            |
| CAMK2D       | calcium/calmodulin-dependent protein kin     | 5 112855659 113159947  | 0.127663              | -1.29            | 0.398789              | 1.28             | 0.457384              | 1.16             |
| NEURL1B      | E3 ubiquitin-protein ligase NEURL1B          | 6 172270759 172316165  | 0.127937              | 1.23             | 0.879782              | -1.05            | 0.383452              | 1.15             |
| STAT2        | signal transducer and activator of transcrip | 11 55289109 55304304   | 0.127974              | 1.23             | 0.772415              | 1.09             | 0.487677              | 1.12             |
| LOC102136579 | carcinoembryonic antigen-related cell adh    | 19 42147984 42155813   | 0.128012              | 3.65             | 0.116826              | 13.98            | 0.945358              | -1.09            |
| ALKBH8       | alkylated DNA repair protein alkB homol      | 14 103549008 103615977 | 0.128012              | -1.31            | 0.833594              | 1.09             | 0.492094              | 1.16             |
| ANKUB1       | protein ANKUB1                               | 2 51986614 52018052    | 0.128071              | 7.24             | 0.863752              | 1.87             | 0.993228              | -1.02            |
| YWHAZ        | 14-3-3 protein zeta/delta                    | 8 102073222 102101721  | 0.128071              | -1.28            | 0.444652              | 1.25             | 0.930592              | -1.02            |
| PALM         | paralemin-1 isoform X1                       | 19 472920 504133       | 0.128103              | 1.28             | 0.591341              | 1.18             | 0.987187              | 1.00             |
| LOC107127655 |                                              | 15 57743068 57747879   | 0.128103              | -1.95            | 0.652271              | 1.50             | 0.747399              | 1.21             |
| LOC102132662 | HLA class II histocompatibility antigen, D   | 4 57135 66292          | 0.128186              | 1.48             | 0.272419              | -1.61            | 0.050030              | 1.70             |
| RFX7         | DNA-binding protein RFX7                     | 7 33168614 33326183    | 0.128228              | -1.39            | 0.959668              | 1.03             | 0.067384              | 1.52             |
| RNF152       | E3 ubiquitin-protein ligase RNF152           | 18 18561900 18562511   | 0.128251              | 1.47             | 0.042192              | 2.16             | 0.036709              | 1.74             |
| FBXO30       | F-box only protein 30                        | 4 51598930 51605168    | 0.128259              | -1.27            | 0.227416              | 1.37             | 0.425643              | 1.16             |
| LOC107127620 |                                              | 1 182906615 182917093  | 0.128285              | 1.43             | 0.964845              | -1.03            | 0.959841              | 1.02             |
| LOC102144168 |                                              | 5 19147140 19165822    | 0.128313              | -7.76            | 0.866137              | -1.53            | 0.760763              | 1.54             |
| PLEKHG4      | puratrophin-1 isoform X3                     | 20 55435294 55452480   | 0.128409              | 1.63             | 0.927320              | -1.08            | 0.491021              | -1.30            |
| SIDT2        | SID1 transmembrane family member 2 iso       | 14 113132747 113150090 | 0.128409              | 1.19             | 0.986913              | 1.01             | 0.442221              | 1.11             |
| ATP2C1       | calcium-transporting ATPase type 2C mem      | 2 33103097 33267884    | 0.128409              | -1.28            | 0.704718              | 1.14             | 0.301037              | 1.21             |
| TBCA         | uncharacterized protein LOC101865951         | 6 75958880 76042249    | 0.128409              | -1.33            | 0.580044              | -1.22            | 0.561827              | 1.14             |
| SLC16A3      | monocarboxylate transporter 4 isoform X      | 16 79914003 79917014   | 0.128409              | -1.60            | 0.541281              | -1.43            | 0.775618              | 1.13             |
| LOC107130368 | T-cell receptor alpha chain V region 2B4-    | 7 85640106 85640698    | 0.128409              | -2.89            | 0.891226              | -1.29            | 0.764717              | 1.30             |
| XCL1         | lymphotactin isoform X1                      | 1 26548330 26552757    | 0.128463              | 1.70             | 0.774796              | 1.28             | 0.811494              | 1.12             |
| C8Horf33     | UPF0488 protein C8orf33 homolog isofo        | 8 146726889 146728552  | 0.128463              | -1.19            | 0.862681              | -1.05            | 0.944448              | -1.01            |
| LOC102144665 |                                              | 12 86591234 86591645   | 0.128582              | 1.30             | 0.830732              | -1.09            | 0.933292              | 1.02             |
| LOC107130060 |                                              | 6 121909168 121940733  | 0.128669              | -1.86            | 0.965551              | 1.05             | 0.905667              | 1.07             |
| VIMP         | selenoprotein S                              | 7 82241142 82245768    | 0.128773              | -1.17            | 0.443206              | -1.15            | 0.618719              | -1.07            |
| CDC42BPB     | serine/threonine-protein kinase MRCK be      | 7 168203357 168339297  | 0.128781              | 1.20             | 0.499526              | 1.16             | 0.751394              | -1.05            |
| PARN         | poly(A)-specific ribonuclease PARN isofo     | 20 14840212 15047001   | 0.129116              | 1.13             | 0.768315              | -1.05            | 0.661620              | 1.05             |
| ARNT2        | aryl hydrocarbon receptor nuclear transloc   | 7 58897906 59096082    | 0.129232              | 1.46             | 0.956697              | 1.04             | 0.768647              | 1.10             |
| TGFBRI       | TGF-beta receptor type-1 isoform X2          | 15 38616486 38639905   | 0.129232              | -1.42            | 0.364392              | 1.44             | 0.566441              | 1.18             |
| GPR21        | probable G-protein coupled receptor 21       | 15 13004588 13005637   | 0.129233              | -1.80            | 0.397533              | 1.83             | 0.958180              | -1.03            |
| FSD1         | uncharacterized protein LOC101865139         | 19 4326528 4340762     | 0.129236              | 2.02             | 0.505304              | -1.69            | 0.985071              | 1.01             |
| KCNA5        | potassium voltage-gated channel subfamil     | 11 5243964 5245781     | 0.129305              | 1.50             | 0.863714              | -1.11            | 0.337383              | 1.32             |
| PDPK1        | uncharacterized protein LOC101866379         | 20 2673935 2940095     | 0.129305              | 1.19             | 0.993669              | 1.00             | 0.935343              | 1.01             |
| LOC102118253 | protein NipSnap homolog 3A                   | 15 32958291 32969746   | 0.129358              | -1.21            | 0.677554              | 1.11             | 0.661646              | 1.07             |
| FUT7         | alpha-(1-3)-fucosyltransferase 7 isoform X   | 15 1265824 1266993     | 0.129503              | 1.35             | 0.579805              | -1.24            | 0.310728              | 1.28             |
| TMEM203      | transmembrane protein 203                    | 15 1073321 1073731     | 0.129503              | -1.16            | 0.905371              | 1.03             | 0.221729              | -1.15            |
| CLCN5        | H(+)/Cl(-) exchange transporter 5 isoform    | X 48249993 48413594    | 0.129503              | -1.27            | 0.608255              | -1.17            | 0.438502              | -1.16            |
| HSPBAP1      | HSPB1-associated protein 1 isoform X1        | 2 149404858 149452521  | 0.129503              | -1.32            | 0.912161              | -1.05            | 0.962947              | 1.01             |
| SGPL1        | sphingosine-1-phosphate lyase 1 isoform      | 9 64796190 64843205    | 0.129503              | -1.56            | 0.781141              | -1.19            | 0.867228              | -1.07            |
| ADRA1A       | alpha-1A adrenergic receptor isoform X2      | 8 27191477 27300094    | 0.129507              | 1.50             | 0.736745              | -1.21            | 0.303187              | 1.37             |
| PCIF1        | phosphorylated CTD-interacting factor 1      | 10 77612950 77621380   | 0.129507              | 1.18             | 0.526715              | -1.14            | 0.959165              | -1.01            |
| CDON         | cell adhesion molecule-related/down-regu     | 14 121779748 121879440 | 0.129782              | 1.60             | 0.971004              | 1.03             | 0.392451              | -1.37            |
| LOC102142133 |                                              | 7 48252789 48254858    | 0.129822              | 2.09             | 0.388781              | -2.07            | 0.005296              | -3.96            |
| ELL3         | RNA polymerase II elongation factor ELL      | 7 20720964 20725045    | 0.129822              | 1.36             | 0.002863              | -2.18            | 0.832421              | -1.06            |
| LOC102121644 |                                              | 16 122681 127899       | 0.129822              | -1.41            | 0.584157              | 1.27             | 0.578897              | -1.17            |
| PARBPB       | PCNA-interacting partner isoform X1          | 11 105891712 105953252 | 0.129822              | -1.97            | 0.724563              | -1.39            | 0.608592              | 1.33             |
| LOC102137053 | uncharacterized protein LOC102137053 i       | 10 8395553 8426831     | 0.129859              | 1.21             | 0.724486              | 1.10             | 0.679422              | 1.07             |
| SDF4         | 45 kDa calcium-binding protein isoform X     | 1 227187458 227198680  | 0.129902              | 1.14             | 0.402511              | -1.13            | 0.913241              | 1.01             |
| PARL         | uncharacterized protein LOC101926657         | 2 88506263 88560284    | 0.129902              | -1.14            | 0.991767              | 1.00             | 0.194499              | -1.14            |
| LOC107127637 |                                              | 15 44365212 44470933   | 0.129902              | -1.91            | 0.703636              | -1.40            | 0.569639              | -1.35            |
| PPIH         | peptidyl-prolyl cis-trans isomerase H isofo  | 1 185017733 185026816  | 0.130064              | -1.18            | 0.734349              | -1.08            | 0.585021              | -1.08            |
| ZNF304       | zinc finger protein 304                      | 19 58008841 58014535   | 0.130074              | 1.16             | 0.836301              | 1.05             | 0.428634              | 1.10             |
| METRNL       | meteorin-like protein                        | 16 80823555 80835344   | 0.130074              | -1.21            | 0.416781              | 1.20             | 0.040638              | -1.31            |
| TYK2         | non-receptor tyrosine-protein kinase TYK     | 19 10635251 10667388   | 0.130133              | 1.14             | 0.084996              | -1.25            | 0.749562              | -1.04            |
| COP55        | COP9 signalosome complex subunit 5 iso       | 8 68288599 68306516    | 0.130133              | -1.12            | 0.972407              | -1.01            | 0.867780              | -1.02            |
| C6H5orf15    | uncharacterized protein LOC101865511         | 6 132957441 132970448  | 0.130133              | -1.34            | 0.423538              | 1.31             | 0.724059              | 1.09             |
| LOC102145007 |                                              | 3 1466574 1471230      | 0.130133              | -2.58            | 0.662401              | -1.91            | 0.280441              | -2.59            |
| KIAA1522     | uncharacterized protein KIAA1522 homo        | 1 195192496 195213673  | 0.130138              | 1.22             | 0.040297              | -1.47            | 0.265281              | -1.18            |
| TMEM135      | transmembrane protein 135 isoform X1         | 14 82594183 82852693   | 0.130138              | -1.20            | 0.675303              | 1.11             | 0.684166              | -1.07            |
| DUSP14       | dual specificity protein phosphatase 14 iso  | 16 48958846 48959442   | 0.130156              | -1.50            | 0.924840              | 1.07             | 0.587274              | -1.19            |
| EPX          | eosinophil peroxidase                        | 16 43709415 43720023   | 0.130206              | 2.36             | 0.064481              | 3.77             | 0.048859              | 2.59             |
| LOC102120372 | small integral membrane protein 10-like p    | X 132044938 132045174  | 0.130228              | 1.47             | 0.079040              | 1.95             | 0.694933              | 1.13             |
| CARD9        | caspace recruitment domain-containing pr     | 15 1981725 1991886     | 0.130228              | -1.47            | 0.968876              | 1.03             | 0.326222              | 1.34             |
| TIMM21       | mitochondrial import inner membrane tra      | 18 5971788 5980799     | 0.130234              | -1.16            | 0.616456              | 1.10             | 0.944217              | 1.01             |
| ADGRD1       | adhesion G-protein coupled receptor D1 i     | 11 135369183 135556578 | 0.130251              | 1.91             | 0.338075              | 2.03             | 0.397547              | -1.53            |
| CORIN        | atrial natriuretic peptide-converting enzym  | 5 47617735 47919437    | 0.130251              | 1.67             | 0.769498              | 1.24             | 0.496073              | -1.32            |
| RAB8B        | ras-related protein Rab-8B                   | 7 40549937 40624922    | 0.130459              | -1.52            | 0.368855              | 1.54             | 0.258380              | 1.43             |
| CFDP1        | craniofacial development protein 1           | 20 63471663 63609245   | 0.130525              | -1.14            | 0.905577              | 1.03             | 0.330730              | -1.10            |
| EFHD1        | uncharacterized protein LOC101867418         | 12 122459868 122509887 | 0.130678              | 2.32             | 0.302130              | 2.80             | 0.791169              | 1.23             |
| RARS2        | probable arginine--tRNA ligase, mitochon     | 4 86342667 86414071    | 0.130678              | -1.21            | 0.912228              | -1.04            | 0.913709              | 1.02             |
| KIF1C        | kinesin-like protein KIF1C                   | 16 5083917 5108006     | 0.130720              | 1.30             | 0.308296              | 1.35             | 0.398829              | -1.19            |
| WDR36        | WD repeat-containing protein 36              | 6 109798736 109833720  | 0.130720              | -1.33            | 0.244245              | 1.44             | 0.536393              | 1.15             |
| YEATS4       | YEATS domain-containing protein 4            | 11 68420612 68444224   | 0.130720              | -1.35            | 0.922796              | -1.05            | 0.944673              | 1.02             |
| LOC107127464 |                                              | 14 121675809 121700382 | 0.130756              | -2.04            | 0.985599              | -1.02            | 0.240860              | -1.83            |
| LOC107129131 |                                              | 3 186691598 186692799  | 0.131159              | 2.21             | 0.474410              | 1.99             | 0.497080              | -1.55            |
| RAP1GDS1     | rap1 GTPase-GDP dissociation stimulator      | 5 97493034 97464385    | 0.131159              | -1.20            | 0.083913              | -1.38            | 0.328134              | 1.15             |
| ZNF283       | zinc finger protein 283 isoform X2           | 19 44598031 44610355   | 0.131159              | -1.44            | 0.924667              | -1.06            | 0.184407              | -1.43            |
| LOC107129314 | T-cell receptor beta chain V region A20.2    | 3 175442891 175443534  | 0.131189              | 1.68             | 0.491702              | -1.45            | 0.017287              | -2.02            |



| Gene symbol  | Gene name                                                                | chr_start_end          | Day3 adjusted P-value | Day3 fold change | Day5 adjusted P-value | Day5 fold change | Day7 adjusted P-value | Day7 fold change |
|--------------|--------------------------------------------------------------------------|------------------------|-----------------------|------------------|-----------------------|------------------|-----------------------|------------------|
| KCNE3        | potassium voltage-gated channel subfamily A member 3                     | 14 69746413 69746724   | 0.131189              | 1.36             | 0.457314              | -1.31            | 0.996126              | -1.00            |
| SFXN1        | sideroflexin-1 isoform X1                                                | 6 175191569 175237367  | 0.131189              | -1.28            | 0.935150              | 1.04             | 0.382372              | 1.18             |
| MROH6        | maestro heat-like repeat-containing protein 6                            | 8 145199967 145207350  | 0.131379              | 1.75             | 0.701400              | -1.34            | 0.594363              | -1.25            |
| ATF6B        | cyclic AMP-dependent transcription factor 6                              | 4 138765505 138777355  | 0.131458              | 1.14             | 0.372812              | -1.15            | 0.983475              | 1.00             |
| FIBIN        | fin bud initiation factor homolog                                        | 14 40504902 40505537   | 0.131580              | 1.50             | 0.214446              | 1.73             | 0.321756              | 1.37             |
| SGCD         | delta-sarcoglycan isoform X1                                             | 6 155717531 156131430  | 0.131580              | 1.50             | 0.745240              | 1.20             | 0.758921              | -1.11            |
| SNRPA1       | U2 small nuclear ribonucleoprotein A'                                    | 7 82249722 82263660    | 0.131580              | -1.22            | 0.601698              | -1.14            | 0.824848              | 1.04             |
| LOC10129819  |                                                                          | 5 122528142 122805505  | 0.131629              | 1.80             | 0.736198              | 1.31             | 0.746541              | 1.17             |
| KPNA5        | importin subunit alpha-6 isoform X2                                      | 4 20700890 20750408    | 0.131666              | -1.59            | 0.369296              | 1.61             | 0.677607              | 1.17             |
| FABP3        | fatty acid-binding protein, heart                                        | 1 196661318 196668304  | 0.131710              | 1.58             | 0.075977              | -2.02            | 0.113287              | -1.58            |
| RNASEH2B     | ribonuclease H2 subunit B isoform X3                                     | 17 30126614 30189567   | 0.131856              | -1.23            | 0.279617              | -1.29            | 0.672205              | 1.08             |
| DGAT2        | diacylglycerol O-acyltransferase 2                                       | 14 71068598 71100756   | 0.131942              | -1.33            | 0.116062              | 1.60             | 0.180693              | -1.34            |
| MME          | neprilysin isoform X1                                                    | 2 57490129 57573632    | 0.132077              | 1.85             | 0.886910              | -1.15            | 0.838443              | 1.12             |
| CXCL10       | C-X-C motif chemokine 10                                                 | 5 58454822 58456342    | 0.132083              | 1.63             | 0.047410              | 2.58             | 0.000121              | 3.04             |
| LOC102117303 | cytochrome b-c1 complex subunit 7                                        | 8 97402494 97407756    | 0.132288              | -1.15            | 0.846266              | -1.04            | 0.004903              | -1.29            |
| EP300        | histone acetyltransferase p300 isoform X3                                | 10 9953619 10043796    | 0.132417              | 1.24             | 0.928719              | 1.03             | 0.479733              | 1.13             |
| ISYNA1       | inositol-3-phosphate synthase 1 isoform X1                               | 19 18872364 18877927   | 0.132428              | 1.36             | 0.991729              | 1.01             | 0.501531              | -1.18            |
| GRK6         | G protein-coupled receptor kinase 6 isoform X1                           | 6 177252052 177268026  | 0.132442              | 1.17             | 0.253058              | -1.22            | 0.966458              | 1.01             |
| CDC7         | cell division cycle 7-related protein kinase                             | 1 135446730 135471783  | 0.132442              | -1.32            | 0.825050              | 1.10             | 0.570819              | 1.14             |
| KLHL24       | kelch-like protein 24                                                    | 2 88324572 88348079    | 0.132505              | 1.40             | 0.193593              | -1.59            | 0.433573              | -1.23            |
| MFSD3        | major facilitator superfamily domain-containing protein 3                | 8 146202616 146204490  | 0.132505              | -1.25            | 0.130012              | -1.42            | 0.391188              | -1.16            |
| ZFP42        | zinc finger protein 42 homolog                                           | 5 187463624 187464601  | 0.132575              | 3.18             | 0.457865              | 2.82             | 0.575194              | -1.54            |
| ADAM22       | disintegrin and metalloproteinase domain-containing protein 22           | 3 123859878 124101777  | 0.132575              | 1.57             | 0.455762              | 1.51             | 0.138322              | 1.63             |
| LOC102141410 | 60S ribosomal protein L12                                                | 19 52565133 52565630   | 0.132575              | -1.29            | 0.827549              | -1.09            | 0.643473              | -1.10            |
| VAV2         | guanine nucleotide exchange factor VAV2                                  | 15 4653345 4690820     | 0.132695              | 1.18             | 0.909241              | 1.03             | 0.914864              | -1.02            |
| TM2D1        | TM2 domain-containing protein 1                                          | 1 165666113 165704548  | 0.132717              | -1.18            | 0.525333              | 1.14             | 0.618523              | 1.07             |
| ZNF384       | zinc finger protein 384 isoform X7                                       | 11 6964901 6972727     | 0.132738              | 1.13             | 0.388985              | -1.13            | 0.838398              | 1.02             |
| PDDC1        | Parkinson disease 7 domain-containing protein 1                          | 14 595944 602387       | 0.132746              | 1.22             | 0.966279              | -1.02            | 0.615187              | 1.09             |
| CSE1L        | exportin-2                                                               | 10 80799200 80835216   | 0.132746              | -1.16            | 0.926864              | 1.02             | 0.231484              | 1.14             |
| LOC102121760 | LOW QUALITY PROTEIN: olfactory receptor neuron marker 1                  | 4 142832564 142833905  | 0.132757              | -2.64            | 0.444652              | -2.31            | 0.731272              | 1.27             |
| LOC102128092 | homeobox protein TGIF1-like isoform X1                                   | 18 64641616 64641972   | 0.132803              | 1.93             | 0.757402              | -1.32            | 0.999780              | -1.00            |
| LY96         | lymphocyte antigen 96 isoform X2                                         | 8 75164962 75277360    | 0.132823              | -1.32            | 0.982353              | 1.01             | 0.505648              | 1.16             |
| RLTPR        | leucine-rich repeat-containing protein 16C                               | 20 55827552 55840158   | 0.132852              | 1.37             | 0.270271              | -1.47            | 0.988368              | 1.00             |
| MTHFD2       | bifunctional methylenetetrahydrofolate dehydrogenase 2                   | 13 35702085 35723295   | 0.133174              | -1.59            | 0.852646              | 1.15             | 0.994007              | 1.00             |
| LOC107131034 | Ig lambda chain V-III region SH-like                                     | 10 28785176 28785754   | 0.133466              | 5.33             | 0.858597              | -1.46            | 0.076262              | -5.08            |
| LOC102123686 | putative golgin subfamily A member 6-like                                | 7 1550960 1560010      | 0.133466              | 2.68             | 0.886923              | -1.25            | 0.625111              | -1.46            |
| CACNA1E      | voltage-dependent R-type calcium channel subunit 1E                      | 1 39295980 39693490    | 0.133466              | 2.41             | 0.825364              | -1.35            | 0.040638              | -3.28            |
| DERL3        | derlin-3 isoform X3                                                      | 0 264274 268384        | 0.133466              | 1.55             | 0.295473              | -1.67            | 0.599951              | 1.20             |
| LOC101864788 | type II inositol 1,4,5-trisphosphate 5-phosphatase 2                     | 1 189918012 189947449  | 0.133466              | 1.11             | 0.990005              | 1.00             | 0.705258              | -1.03            |
| MRPS7        | 28S ribosomal protein S7, mitochondrial                                  | 16 72538519 72542837   | 0.133466              | -1.15            | 0.505454              | -1.12            | 0.838912              | -1.03            |
| VTA1         | vacuolar protein sorting-associated protein 1                            | 4 46638569 46715474    | 0.133466              | -1.17            | 0.714831              | 1.09             | 0.454385              | 1.10             |
| USP33        | ubiquitin carboxyl-terminal hydrolase 33                                 | 1 149471700 149518766  | 0.133466              | -1.22            | 0.329312              | 1.25             | 0.068555              | 1.30             |
| CAMK2N1      | calcium/calmodulin-dependent protein kinase 2 gamma                      | 1 207928457 207930156  | 0.133694              | 1.66             | 0.297373              | 1.82             | 0.867191              | 1.08             |
| 4-Mar        | #N/A                                                                     | #N/A                   | 0.133776              | 4.59             | 0.836845              | -1.97            | 0.631821              | 1.82             |
| LOC102124837 |                                                                          | 4 164282297 164302070  | 0.133810              | 1.66             | 0.652908              | 1.38             | 0.472654              | 1.37             |
| TUB          | tubby protein homolog isoform X2                                         | 14 59738339 59822402   | 0.133810              | 1.63             | 0.900496              | 1.11             | 0.603858              | -1.23            |
| COLEC11      | collectin-11 isoform X3                                                  | 13 107994983 108042098 | 0.133810              | 1.60             | 0.662700              | -1.33            | 0.939484              | 1.04             |
| ZNF423       | zinc finger protein 423 isoform X3                                       | 20 37253299 37627397   | 0.133810              | 1.50             | 0.444870              | 1.45             | 0.891520              | -1.05            |
| CCDC102A     | coiled-coil domain-containing protein 102                                | 20 45535626 45551346   | 0.133810              | 1.45             | 0.803847              | -1.15            | 0.599130              | -1.17            |
| FBXO18       | F-box DNA helicase 1 isoform X3                                          | 9 6254115 6282141      | 0.133810              | 1.17             | 0.944805              | -1.02            | 0.289956              | -1.13            |
| LOC102131151 | NADH-cytochrome b5 reductase 1 isoform X1                                | 1 61356315 61360983    | 0.133810              | -1.12            | 0.966170              | -1.01            | 0.268199              | -1.10            |
| SRI          | sorcin isoform X1                                                        | 3 123830186 123849621  | 0.133810              | -1.16            | 0.797063              | 1.06             | 0.127330              | -1.18            |
| BRWD1        | bromodomain and WD repeat-containing protein 1                           | 3 7459932 7591097      | 0.133810              | -1.17            | 0.446744              | 1.15             | 0.581437              | 1.07             |
| CNOT6        | CCR4-NOT transcription complex subunit 6                                 | 6 180553499 180603462  | 0.133810              | -1.23            | 0.235680              | 1.31             | 0.954015              | 1.01             |
| ENPP5        | ectonucleotide pyrophosphatase/phosphodiesterase 5                       | 4 124359317 124364777  | 0.133810              | -1.37            | 0.412877              | 1.35             | 0.039809              | -1.56            |
| CKB          | creatine kinase B-type isoform X2                                        | 7 168862332 168864967  | 0.133817              | 1.30             | 0.629019              | 1.18             | 0.066805              | -1.40            |
| CLMP         | CXADR-like membrane protein                                              | 14 119054385 119176449 | 0.133822              | 1.51             | 0.901081              | 1.09             | 0.110423              | 1.61             |
| SCN1B        | sodium channel subunit beta-1 isoform X1                                 | 19 35455837 35465006   | 0.133895              | -1.28            | 0.993219              | -1.00            | 0.906574              | 1.03             |
| C7H15orf41   | uncharacterized protein C15orf41 homolog                                 | 7 13346240 13383108    | 0.133929              | -1.22            | 0.927608              | 1.03             | 0.822811              | -1.04            |
| AP5M1        | AP-5 complex subunit mu-1 isoform X1                                     | 7 121529714 121550387  | 0.133929              | -1.28            | 0.755129              | 1.12             | 0.360661              | 1.19             |
| LOC102122986 | DEP domain-containing protein 5                                          | 10 19578685 19620262   | 0.134037              | 1.32             | 0.266220              | -1.42            | 0.574625              | 1.14             |
| TSC22D4      | TSC22 domain family protein 4                                            | 3 44719999 44731469    | 0.134037              | 1.17             | 0.203473              | -1.24            | 0.594476              | -1.07            |
| ND1          | NADH dehydrogenase subunit 1                                             | MT 3269 4223           | 0.134037              | -1.28            | 0.252594              | -1.36            | 0.671881              | -1.09            |
| SNRPF        | small nuclear ribonucleoprotein F                                        | 11 99565365 99572335   | 0.134037              | -1.32            | 0.658921              | -1.18            | 0.922429              | -1.03            |
| AOX2         | aldehyde oxidase 2                                                       | 12 90077514 90151959   | 0.134037              | -1.49            | 0.328383              | -1.57            | 0.419947              | -1.28            |
| LOC107129333 | T-cell receptor beta chain V region PHDS                                 | 3 175826764 175827295  | 0.134077              | 2.05             | 0.396724              | -1.84            | 0.054956              | 2.31             |
| ADAMTS17     | A disintegrin and metalloproteinase with thrombospondin type 1 motifs 17 | 7 80967115 81323620    | 0.134077              | 1.45             | 0.079845              | 2.06             | 0.418217              | 1.26             |
| C7           | complement component C7                                                  | 6 41396433 41477554    | 0.134077              | 1.34             | 0.260647              | 1.44             | 0.620663              | 1.13             |
| MAP4K1       | mitogen-activated protein kinase kinase kinase 1                         | 19 39070959 39082877   | 0.134077              | 1.33             | 0.350754              | -1.36            | 0.395247              | 1.21             |
| ANKRD27      | ankyrin repeat domain-containing protein 27                              | 19 32937036 33000165   | 0.134077              | 1.14             | 0.636002              | -1.09            | 0.179339              | -1.15            |
| CENPU        | centromere protein U isoform X2                                          | 5 184085919 184128822  | 0.134077              | -1.43            | 0.277657              | -1.54            | 0.304288              | 1.33             |
| HES6         | transcription cofactor HES-6 isoform X1                                  | 12 128087159 128088719 | 0.134077              | -1.73            | 0.214634              | -2.19            | 0.390600              | -1.45            |
| PCDH14       | protocadherin beta-14                                                    | 6 140349217 140351613  | 0.134184              | 1.37             | 0.692995              | 1.18             | 0.493383              | 1.19             |
| MMRN2        | multimerin-2 isoform X1                                                  | 9 48767359 48786704    | 0.134184              | 1.28             | 0.019859              | 1.71             | 0.471037              | 1.15             |
| MPP1         | 55 kDa erythrocyte membrane protein isoform X1                           | X 151650895 151676771  | 0.134184              | -1.47            | 0.651759              | -1.26            | 0.676818              | -1.15            |
| ZMAT3        | zinc finger matrin-type protein 3 isoform X1                             | 2 83483474 83535772    | 0.134236              | -1.46            | 0.714110              | 1.21             | 0.674607              | 1.14             |
| LOC102118498 | L-lactate dehydrogenase A chain                                          | 14 49277547 49282277   | 0.134283              | -1.67            | 0.958975              | -1.05            | 0.639907              | 1.22             |
| SLC33A1      | uncharacterized protein LOC101864853                                     | 2 4254 18229           | 0.134368              | -1.33            | 0.615515              | 1.20             | 0.651846              | 1.11             |
| RWD3         | RWD domain-containing protein 3 isoform X1                               | 1 131665838 131679860  | 0.134512              | -1.44            | 0.813831              | 1.14             | 0.650980              | 1.15             |
| LOC107127613 |                                                                          | 15 25536145 25546777   | 0.134669              | 1.30             | 0.945534              | 1.03             | 0.300259              | 1.23             |
| SLC25A32     | mitochondrial folate transporter/carrier                                 | 8 104565110 104579496  | 0.134697              | -1.43            | 0.219956              | 1.62             | 0.672395              | 1.14             |
| PEX3         | peroxisomal biogenesis factor 3 isoform X1                               | 4 47977942 48015675    | 0.134733              | -1.29            | 0.737099              | 1.13             | 0.709969              | -1.08            |
| EFR3A        | protein EFR3 homolog A isoform X2                                        | 8 133288847 133388495  | 0.134733              | -1.31            | 0.631386              | 1.19             | 0.433230              | 1.18             |
| TMEM190      | transmembrane protein 190                                                | 19 56219276 56220752   | 0.134889              | 2.80             | 0.833594              | -1.42            | 0.854580              | -1.19            |
| SMARCD2      | SWI/SNF-related matrix-associated actin-binding protein 2                | 16 61129581 61134325   | 0.135025              | 1.13             | 0.885953              | -1.03            | 0.403924              | 1.08             |
| LIPC         | hepatic triacylglycerol lipase isoform X1                                | 7 35566264 35709308    | 0.135177              | 1.60             | 0.872880              | 1.13             | 0.493425              | 1.28             |
| SMIM6        | small integral membrane protein 6                                        | 16 72954613 72955345   | 0.135353              | 1.74             | 0.240963              | 2.24             | 0.986042              | -1.01            |

| Gene symbol  | Gene name                                    | chr_start_end          | Day3 adjusted P-value | Day3 fold change | Day5 adjusted P-value | Day5 fold change | Day7 adjusted P-value | Day7 fold change |
|--------------|----------------------------------------------|------------------------|-----------------------|------------------|-----------------------|------------------|-----------------------|------------------|
| CREB3L4      | cyclic AMP-responsive element-binding p      | 1 97893409 97898203    | 0.135353              | -1.17            | 0.350736              | -1.19            | 0.474204              | -1.10            |
| ZNF576       | zinc finger protein 576 isoform X1           | 19 44328743 44331322   | 0.135531              | 1.18             | 0.596562              | 1.12             | 0.806607              | -1.04            |
| CETP         | cholesterol ester transfer protein isoform X | 20 44984328 45009535   | 0.136650              | 1.98             | 0.530150              | -1.71            | 0.631387              | -1.31            |
| AS3MT        | arsenite methyltransferase                   | 9 101907030 101935302  | 0.135681              | 1.25             | 0.008279              | -1.77            | 0.184407              | -1.25            |
| LGR5         | leucine-rich repeat-containing G-protein c   | 11 70507555 70652165   | 0.135693              | 2.25             | 0.012227              | 34.17            | 0.020717              | 4.12             |
| TAIF2        | transcription initiation factor TFIIID subun | 1 199529784 199547429  | 0.135700              | -1.20            | 0.955351              | -1.02            | 0.910990              | 1.02             |
| TIPIN        | TIMELESS-interacting protein isoform X       | 7 43923674 43945434    | 0.135761              | -1.48            | 0.417941              | -1.46            | 0.071591              | 1.65             |
| TTL          | tubulin-acetylation ligase isoform X1        | 13 16622910 16664823   | 0.135839              | 1.19             | 0.385822              | 1.19             | 0.420820              | 1.12             |
| NAA16        | N-alpha-acetyltransferase 16, NatA auxilli   | 17 20559493 20624352   | 0.135839              | -1.28            | 0.444709              | 1.26             | 0.883057              | 1.04             |
| SEC11A       | signal peptidase complex catalytic subuni    | 7 65069512 65113976    | 0.135839              | -1.15            | 0.802412              | -1.06            | 0.807197              | 1.03             |
| USP43        | ubiquitin carboxyl-terminal hydrolase 43     | 16 9807821 9899764     | 0.135931              | 1.32             | 0.765297              | -1.13            | 0.198886              | -1.31            |
| TCTN1        | tectonic-1 isoform X4                        | 11 114234770 114284879 | 0.135931              | 1.25             | 0.085808              | 1.47             | 0.442221              | 1.14             |
| LOC102144021 | leukocyte immunoglobulin-like receptor s     | 19 55611279 55616084   | 0.135931              | -2.08            | 0.869944              | -1.23            | 0.213318              | -2.17            |
| DYNCH1H      |                                              | 7 167190601 167285474  | 0.135985              | 1.12             | 0.858895              | -1.03            | 0.698932              | -1.04            |
| KLHL31       | kelch-like protein 31                        | 4 117055491 117059157  | 0.136063              | 2.42             | 0.376012              | 2.71             | 0.015553              | -5.98            |
| SLC36A1      | proton-coupled amino acid transporter 1 i    | 6 150768778 150800574  | 0.136099              | -1.39            | 0.781853              | -1.14            | 0.722237              | 1.11             |
| SLC17A5      | sialin isoform X1                            | 4 100267106 100327337  | 0.136188              | -1.20            | 0.440153              | -1.19            | 0.910996              | -1.02            |
| LOC102140779 |                                              | 12 96893403 96923106   | 0.136232              | -3.73            | 1.000000              | 1.90             | 0.318123              | 4.36             |
| BHMT         | betaine--homocysteine S-methyltransferas     | 6 77402754 77422768    | 0.136246              | 2.97             | 0.209232              | 4.51             | 0.917700              | -1.11            |
| LOC102135060 |                                              | 12 106351422 106907455 | 0.136246              | 2.66             | 0.864965              | -1.33            | 0.429531              | -1.76            |
| LOC102121669 |                                              | 1 37200659 37224838    | 0.136246              | 1.28             | 0.966983              | -1.02            | 0.715942              | -1.08            |
| ITPR1PL2     | inositol 1,4,5-trisphosphate receptor-inter  | 20 18474824 18476431   | 0.136246              | 1.20             | 0.928186              | 1.03             | 0.751032              | -1.05            |
| ERMARD       | endoplasmic reticulum membrane-associat      | 4 954134 985430        | 0.136246              | -1.13            | 0.018407              | -1.33            | 0.547072              | -1.07            |
| RAD18        | E3 ubiquitin-protein ligase RAD18 isofo      | 2 139852732 139933356  | 0.136246              | -1.19            | 0.974056              | -1.01            | 0.547372              | 1.09             |
| TRIM33       | E3 ubiquitin-protein ligase TRIM33 isofo     | 1 112252378 112369811  | 0.136246              | -1.34            | 0.360606              | 1.41             | 0.261264              | 1.29             |
| PFKP         | ATP-dependent 6-phosphofructokinase, p       | 9 3368192 3440049      | 0.136246              | -1.59            | 0.903712              | -1.10            | 0.641584              | 1.20             |
| LOC107129687 |                                              | 5 79213949 79217118    | 0.136246              | -7.90            | 1.000000              | 3.29             | 1.000000              | 6.51             |
| LOC102132686 | LOW QUALITY PROTEIN: folate recep            | 14 67323308 67328523   | 0.136246              | -19.59           | 1.000000              | 1.00             | 1.000000              | -4.01            |
| C5H4orf47    | UPF0602 protein C4orf47 homolog              | 5 184843835 184863815  | 0.136246              | 2.20             | 0.747864              | -1.46            | 0.699781              | 1.31             |
| LOC107128728 |                                              | 0 3343 6719            | 0.136246              | -1.38            | 0.368285              | -1.41            | 0.998900              | -1.00            |
| CARD6        | caspase recruitment domain-containing pr     | 6 41321812 41335520    | 0.136252              | 1.31             | 0.983292              | 1.01             | 0.400573              | 1.20             |
| LOC102145552 | protocadherin beta-17 isoform X1             | 6 140284228 140286618  | 0.136510              | 1.41             | 0.779038              | 1.14             | 0.111994              | 1.49             |
| LOC102117738 | DNA-directed RNA polymerase II subuni        | 0 1728 3424            | 0.136510              | 1.40             | 0.886381              | -1.08            | 0.231776              | 1.36             |
| 1-Sep        | #N/A                                         | #N/A                   | 0.136510              | 1.33             | 0.040718              | -1.77            | 0.523257              | 1.16             |
| ZNF557       | zinc finger protein 557 isoform X3           | 19 7271349 7286411     | 0.136510              | 1.24             | 0.414458              | -1.24            | 0.393141              | 1.16             |
| LOC107130231 |                                              | 7 41440933 41451604    | 0.136510              | -2.17            | 0.329105              | 2.51             | 0.234313              | 2.11             |
| PRELP        | prolargin                                    | 1 61958200 61961900    | 0.136790              | 1.47             | 0.394108              | 1.48             | 0.585309              | 1.19             |
| EID1         | EP300-interacting inhibitor of differentiat  | 7 25826413 25826979    | 0.136790              | -1.38            | 0.048507              | 1.88             | 0.424357              | 1.23             |
| LYPLAL1      | lysophospholipase-like protein 1 isoform     | 1 77865159 77902992    | 0.136790              | -1.45            | 0.947158              | 1.05             | 0.519687              | -1.22            |
| LOC102132822 |                                              | 7 114246068 114263697  | 0.136790              | -1.59            | 0.199566              | -1.82            | 0.184387              | -1.53            |
| LOC102128143 | leukocyte immunoglobulin-like receptor s     | 19 55196274 55201156   | 0.136790              | -1.96            | 0.821157              | -1.27            | 0.944732              | 1.05             |
| TPPP         | tubulin polymerization-promoting protein     | 6 433202 464262        | 0.136798              | 1.86             | 0.996095              | -1.00            | 0.651418              | -1.27            |
| LOC102119520 | T-cell receptor alpha chain V region HPB     | 7 85593589 85594354    | 0.136897              | 2.37             | 0.061549              | -4.73            | 0.001112              | 4.83             |
| CD5          | T-cell surface glycoprotein CD5              | 14 13165522 13173342   | 0.136962              | 1.53             | 0.084996              | -2.08            | 0.779243              | 1.11             |
| TRA2B        | uncharacterized protein LOC101864908         | 2 90671909 90691843    | 0.136962              | -1.26            | 0.556086              | 1.19             | 0.509790              | 1.13             |
| PNO1         | uncharacterized protein LOC101867387         | 13 41780008 41797038   | 0.137255              | -1.24            | 0.458142              | 1.21             | 0.621127              | 1.09             |
| UPP1         | uridine phosphorylase 1 isoform X1           | 3 72494643 72508551    | 0.137341              | -1.60            | 0.820079              | 1.18             | 0.280431              | -1.48            |
| ERICH6       | glutamate-rich protein 6 isoform X2          | 2 52903851 52950038    | 0.137413              | 1.71             | 0.146236              | 2.28             | 0.499915              | 1.34             |
| LOC102132869 |                                              | 3 9721459 9730021      | 0.137498              | -1.33            | 0.259311              | -1.46            | 0.213887              | 1.32             |
| SULF1        | extracellular sulfatase Sulf-1 isoform X1    | 8 70762519 70856930    | 0.137535              | 1.97             | 0.337761              | 2.12             | 0.902192              | 1.08             |
| PPP1R13B     | apoptosis-stimulating of p53 protein 1 iso   | 7 169080037 169206089  | 0.137611              | 1.23             | 0.873471              | 1.06             | 0.713970              | -1.07            |
| LOC107127937 |                                              | 17 20544749 20552661   | 0.137650              | 2.33             | 0.545993              | -1.93            | 0.988773              | -1.01            |
| STAT3        | signal transducer and activator of transcrip | 16 54032272 54127216   | 0.137650              | 1.24             | 0.992986              | -1.00            | 0.827726              | 1.04             |
| TMEM14B      | transmembrane protein 14B                    | 4 160102079 160109101  | 0.137650              | -1.28            | 0.298754              | 1.34             | 0.185533              | -1.28            |
| SMAD5        | mothers against decapentaplegic homolog      | 6 135263293 135287206  | 0.137650              | -1.39            | 0.199505              | 1.58             | 0.287784              | 1.31             |
| LOC107127956 |                                              | 17 29280430 29296322   | 0.137650              | -1.56            | 0.630206              | 1.32             | 0.972054              | -1.02            |
| LOC102130576 |                                              | 10 24784461 24824790   | 0.137787              | 1.66             | 0.032131              | -3.06            | 0.895506              | -1.07            |
| TNFSF14      | tumor necrosis factor (ligand) superfamily   | 19 6851561 6856690     | 0.137787              | 1.62             | 0.613947              | -1.39            | 0.107394              | 1.75             |
| RRAGA        | uncharacterized protein LOC101865186         | 15 59729793 59730668   | 0.137787              | -1.11            | 0.944129              | -1.01            | 0.493176              | 1.06             |
| ZNF691       | LOW QUALITY PROTEIN: zinc finger p           | 1 184825376 184827523  | 0.137823              | 1.24             | 0.950491              | -1.03            | 0.324994              | -1.18            |
| LOC102114946 | actin, cytoplasmic 2-like                    | 2 133012197 133013195  | 0.137823              | -1.45            | 0.346635              | -1.51            | 0.779709              | -1.10            |
| LOC107126711 |                                              | 11 54546868 54561282   | 0.137823              | -3.04            | 0.663848              | 1.77             | 0.148820              | -4.68            |
| LOC107130290 | Ig heavy chain V-III region 23-like          | 7 171751860 171752260  | 0.137933              | 2.19             | 0.303510              | 2.30             | 0.369391              | 1.63             |
| NOSTRIN      | nostrin isoform X1                           | 12 57676272 57740091   | 0.137933              | 1.67             | 0.151630              | 2.20             | 0.857637              | -1.09            |
| CHMP2B       | charged multivesicular body protein 2b       | 2 180916407 180942156  | 0.137933              | -1.31            | 0.484202              | 1.26             | 0.690063              | 1.10             |
| LOC107129311 | T-cell receptor beta chain V region CTL-1    | 3 175763397 175764079  | 0.138064              | 5.70             | 0.024010              | -40.60           | 0.137694              | 5.29             |
| LOC102145691 | olfactory receptor 5D13-like                 | 14 17240822 17241901   | 0.138261              | -2.25            | 0.619023              | 1.71             | 0.790415              | -1.22            |
| MBNL2        | muscleblind-like protein 2                   | 17 79978545 80032338   | 0.138326              | -1.49            | 0.178482              | 1.78             | 0.399739              | 1.30             |
| RARA         | retinoic acid receptor alpha isoform X1      | 16 51979812 52006446   | 0.138401              | 1.21             | 0.578960              | 1.14             | 0.926306              | -1.02            |
| DNAAF1       |                                              | 20 72424932 72459809   | 0.138567              | 5.70             | 0.936995              | 1.29             | 0.571853              | -2.31            |
| NEO1         | neogenin                                     | 7 50891319 51200602    | 0.138643              | 1.25             | 0.688082              | 1.13             | 0.224250              | -1.24            |
| PPP2R5D      | serine/threonine-protein phosphatase 2A 5    | 4 127565536 127591864  | 0.138690              | 1.96             | 0.458135              | -1.15            | 0.984477              | -1.00            |
| LOC107130648 |                                              | 8 91819695 91839715    | 0.138906              | -3.92            | 1.000000              | 2.81             | 0.507787              | 1.39             |
| PLEKHG7      | pleckstrin homology domain-containing f      | 11 96361213 96430968   | 0.138964              | 2.55             | 0.279617              | -3.56            | 0.959604              | -1.05            |
| ANXA6        | annexin A6 isoform X1                        | 6 150388144 150436421  | 0.138975              | 1.21             | 0.248150              | -1.28            | 0.096547              | 1.26             |
| RNF141       | RING finger protein 141                      | 14 57269558 57288744   | 0.139014              | -1.27            | 0.083541              | 1.52             | 0.369021              | 1.18             |
| HNRNPH1      | heterogeneous nuclear ribonucleoprotein h    | 6 179542265 179550460  | 0.139014              | -1.26            | 0.479475              | 1.22             | 0.850822              | 1.04             |
| TNFAlP8      | tumor necrosis factor alpha-induced prote    | 6 118297645 118419603  | 0.139147              | -1.53            | 0.961300              | -1.04            | 0.588327              | 1.21             |
| FAM170A      | protein FAM170A isoform X4                   | 6 118635395 118641391  | 0.139147              | -2.21            | 0.662901              | -1.59            | 0.382741              | -1.83            |
| SIGLEC6      | sialic acid-binding Ig-like lectin 6         | 19 52269145 52284243   | 0.139210              | 1.93             | 0.454438              | 1.84             | 0.112789              | 2.13             |
| IL17RA       | interleukin-17 receptor A                    | 10 33709958 33736057   | 0.139210              | 1.32             | 0.982409              | 1.01             | 0.271206              | 1.27             |
| TSPEAR       | thrombospondin-type laminin G domain a       | 3 2178206 2258388      | 0.139217              | -2.00            | 0.001892              | -6.49            | 0.150324              | -2.06            |
| C2CD2        | C2 domain-containing protein 2 isoform X     | 3 4821293 4887122      | 0.139245              | 1.34             | 0.387726              | 1.35             | 0.903664              | -1.03            |
| SYT5         | uncharacterized protein LOC101865680         | 19 55991109 55997158   | 0.139283              | 4.72             | 0.982681              | -1.07            | 0.262060              | -3.91            |
| PIPOX        | peroxisomal sarcosine oxidase                | 16 25323657 25336919   | 0.139283              | 1.22             | 0.024796              | -1.51            | 0.400981              | 1.14             |
| MAPK1IP1L    | MAPK-interacting and spindle-stabilizing     | 7 119278390 119281341  | 0.139283              | -1.31            | 0.441226              | 1.28             | 0.710680              | 1.09             |
| SLC35A3      | UDP-N-acetylglucosamine transporter iso      | 1 126809455 126875423  | 0.139531              | -1.22            | 0.092418              | 1.40             | 0.354330              | -1.16            |

| Gene symbol  | Gene name                                                                      | chr_start_end          | Day3 adjusted P-value | Day3 fold change | Day5 adjusted P-value | Day5 fold change | Day7 adjusted P-value | Day7 fold change |
|--------------|--------------------------------------------------------------------------------|------------------------|-----------------------|------------------|-----------------------|------------------|-----------------------|------------------|
| ISLR         | immunoglobulin superfamily containing 1                                        | 7 52195831 52197117    | 0.139602              | 1.32             | 0.775989              | -1.12            | 0.266714              | 1.27             |
| CCDC65       | coiled-coil domain-containing protein 65                                       | 11 47731010 47747769   | 0.139664              | 3.57             | 0.943369              | 1.20             | 0.571342              | -1.91            |
| OPHN1        | oligophrenin-1 isoform X3                                                      | X 65066483 65442864    | 0.139664              | 1.34             | 0.820432              | 1.11             | 0.756426              | -1.08            |
| RAB11FIP3    | rab11 family-interacting protein 3 isoform X1                                  | 20 495107 533276       | 0.139664              | 1.31             | 0.773095              | 1.12             | 0.586517              | -1.13            |
| VPS41        | vacuolar protein sorting-associated protein 41                                 | 3 81584509 81771928    | 0.139664              | 1.31             | 0.936735              | 1.04             | 0.493550              | 1.16             |
| RPL6         | 60S ribosomal protein L6                                                       | 11 116110142 116113542 | 0.139664              | 1.19             | 0.911867              | -1.03            | 0.569612              | -1.09            |
| SLC22A31     | putative solute carrier family 22 member 31                                    | 20 77651241 77656756   | 0.139664              | -1.44            | 0.042636              | -2.07            | 0.004676              | -1.96            |
| GRIN1        | glutamate receptor ionotropic, NMDA 1 isoform X1                               | 15 1110568 1139187     | 0.139795              | 2.13             | 0.971004              | 1.06             | 0.925824              | -1.07            |
| LOC107128199 |                                                                                | 19 15332093 15349672   | 0.139810              | -12.99           | 1.000000              | -2.07            | 0.505648              | 3.64             |
| NID2         | nidogen-2 isoform X4                                                           | 7 116184910 116247290  | 0.139823              | 2.06             | 0.928165              | -1.12            | 0.249085              | 1.90             |
| VIM          | vimentin                                                                       | 9 17783456 17791221    | 0.139920              | -1.28            | 0.468755              | -1.25            | 0.030073              | -1.46            |
| LOC102143328 |                                                                                | 8 91018299 91032354    | 0.140007              | -2.25            | 0.712998              | 1.49             | 0.852944              | 1.15             |
| ADCK3        | atypical kinase ADCK3, mitochondrial                                           | 1 85820456 85845233    | 0.140146              | 1.30             | 0.909241              | -1.05            | 0.191881              | -1.30            |
| PODNL1       | podocan-like protein 1 isoform X1                                              | 19 14269054 14275332   | 0.140303              | 1.58             | 0.557873              | -1.41            | 0.010386              | 2.13             |
| CCNG1        | cyclin-G1                                                                      | 6 162865832 162869125  | 0.140416              | -1.39            | 0.743442              | 1.17             | 0.312854              | 1.30             |
| TEKT1        | tektin-1 isoform X1                                                            | 16 6817461 6844049     | 0.140593              | 5.72             | 0.954800              | 1.22             | 0.511042              | -2.58            |
| DARS         | aspartate--tRNA ligase, cytoplasmic isoform X1                                 | 12 22307754 22390524   | 0.140593              | -1.28            | 0.810966              | 1.10             | 0.435594              | 1.17             |
| PHYHD1       | phytanoyl-CoA dioxygenase domain-containing protein 1                          | 15 10213985 10233541   | 0.140710              | -1.65            | 0.660265              | 1.36             | 0.584065              | -1.26            |
| LRRC40       | leucine-rich repeat-containing domain 40                                       | 1 157143885 157206585  | 0.140815              | -1.45            | 0.351804              | 1.50             | 0.708481              | 1.13             |
| FAM84A       | protein FAM84A                                                                 | 13 96384820 96385698   | 0.140858              | 1.57             | 0.809094              | -1.18            | 0.040758              | 1.88             |
| LOC102134080 | uncharacterized protein LOC102134080 isoform X1                                | 7 11163681 11169399    | 0.140957              | -5.85            | 1.000000              | 13.62            | 0.116915              | 6.53             |
| PPP3CC       | serine/threonine-protein phosphatase 2B catalytic subunit 3                    | 8 22602815 22703909    | 0.140958              | -1.20            | 0.494989              | 1.17             | 0.857193              | -1.03            |
| ATR          | serine/threonine-protein kinase ATR isoform X1                                 | 2 44567318 44689063    | 0.141009              | -1.17            | 0.687552              | 1.09             | 0.589014              | 1.07             |
| FBXL3        | F-box/LRR-repeat protein 3                                                     | 17 59513327 59528328   | 0.141009              | -1.32            | 0.073948              | 1.66             | 0.464380              | 1.18             |
| ADRB1        | beta-1 adrenergic receptor                                                     | 9 113232192 113233801  | 0.141016              | 1.70             | 0.719174              | 1.31             | 0.301105              | -1.54            |
| ZNF551       | zinc finger protein 551 isoform X1                                             | 19 58321147 58327410   | 0.141022              | 1.34             | 0.000207              | 2.60             | 0.535327              | 1.16             |
| CDC37L1      | uncharacterized protein LOC101866234                                           | 15 74391770 74418086   | 0.141161              | -1.37            | 0.150227              | 1.62             | 0.743451              | 1.09             |
| NME5         | nucleoside diphosphate kinase homolog 5                                        | 6 137187583 137218890  | 0.141415              | 1.69             | 0.986197              | 1.02             | 0.555193              | -1.29            |
| PHF3         | PHD finger protein 3 isoform X1                                                | 4 110120135 110194892  | 0.141545              | 1.20             | 0.836007              | -1.06            | 0.602729              | 1.08             |
| GPA33        | cell surface A33 antigen                                                       | 1 25007175 25045777    | 0.141654              | 3.77             | 1.000000              | -2.67            | 0.464622              | -2.20            |
| CECR1        | adenosine deaminase CECR1 isoform X1                                           | 10 33597335 33632835   | 0.141660              | 1.48             | 0.903712              | 1.09             | 0.962579              | 1.02             |
| ARFIP1       | arfapin-1 isoform X1                                                           | 5 152057884 152132720  | 0.141971              | -1.31            | 0.254944              | 1.41             | 0.599341              | 1.13             |
| LOC102120126 | Ig heavy chain V-III region 23-like                                            | 0 717465 718014        | 0.142011              | 3.65             | 0.069848              | 11.57            | 0.864170              | -1.22            |
| GFI1         | zinc finger protein Gfi-1                                                      | 1 134496711 134504860  | 0.142011              | 1.43             | 0.360937              | -1.45            | 0.290849              | 1.33             |
| DUSP26       | dual specificity protein phosphatase 26 isoform X1                             | 8 34265486 34270648    | 0.142019              | 1.96             | 0.159392              | 2.94             | 0.902353              | 1.09             |
| STL7L        | suppressor of tumorigenicity 7 protein-like 7                                  | 1 114171227 114270758  | 0.142158              | -1.17            | 0.939283              | 1.02             | 0.248535              | -1.15            |
| CMC4         | cx9C motif-containing protein 4                                                | X 151954900 151957128  | 0.142158              | -1.21            | 0.979469              | 1.01             | 0.384550              | -1.14            |
| MTCP1        | protein p13 MTCP-1                                                             | X 151958605 151959125  | 0.142158              | -1.21            | 0.979469              | 1.01             | 0.384550              | -1.14            |
| NECAP2       | adaptin ear-binding coat-associated protein 2                                  | 1 211953759 211970755  | 0.142253              | -1.15            | 0.700065              | 1.08             | 0.636190              | -1.06            |
| LOC102127214 |                                                                                | 18 36380189 36393011   | 0.142347              | 1.92             | 0.020553              | -4.35            | 0.294579              | 1.64             |
| GPR68        | ovarian cancer G-protein coupled receptor 68                                   | 7 156198725 156199852  | 0.142388              | 1.34             | 0.341234              | -1.39            | 0.066379              | 1.47             |
| AP5B1        | AP-5 complex subunit beta-1                                                    | 14 8743391 8746126     | 0.142655              | -1.27            | 0.346880              | -1.31            | 0.403142              | 1.18             |
| KHDRBS2      | KH domain-containing, RNA-binding, signal sequence domain-containing protein 2 | 4 111574437 112147780  | 0.142740              | 2.29             | 0.471328              | 2.11             | 0.230341              | -2.19            |
| COL25A1      | collagen alpha-1(XV) chain isoform X4                                          | 5 108193627 108707855  | 0.142893              | 5.01             | 0.115418              | 5.47             | 0.977740              | -1.03            |
| ANTXR1       | anthrax toxin receptor-like isoform X2                                         | 9 44909464 44955012    | 0.142901              | 3.39             | 0.140357              | 7.81             | 0.642842              | -1.55            |
| ARL6         | ADP-ribosylation factor-like protein 6 isoform X1                              | 2 174180954 174212186  | 0.142910              | -1.34            | 0.982409              | -1.01            | 0.485238              | 1.18             |
| FAM150B      | protein FAM150B isoform X2                                                     | 13 110922053 110929664 | 0.142910              | -1.67            | 0.205126              | -2.11            | 0.007394              | -2.49            |
| DLG2         | disks large homolog 2 isoform X2                                               | 14 78939639 81195891   | 0.142991              | 1.43             | 0.555357              | 1.30             | 0.095274              | 1.52             |
| PTPN3        | tyrosine-protein phosphatase non-receptor type 3                               | 15 28216332 28302840   | 0.143423              | 1.14             | 0.257743              | -1.19            | 0.069693              | -1.19            |
| EHF          | ETS homologous factor isoform X3                                               | 14 32769160 32795706   | 0.143437              | 1.45             | 0.909241              | -1.08            | 0.322448              | 1.34             |
| FAM19A2      | uncharacterized protein LOC101925244                                           | 11 60857208 61027415   | 0.143773              | -1.36            | 0.985686              | -1.01            | 0.503095              | 1.18             |
| SLC6A16      | orphan sodium- and chloride-dependent transporter 16                           | 19 50102711 50133617   | 0.143819              | 1.77             | 0.917199              | 1.11             | 0.183258              | -1.77            |
| MTFR1        | mitochondrial fission regulator 1 isoform X1                                   | 8 66876085 66925572    | 0.143969              | -1.27            | 0.553833              | 1.20             | 0.698625              | 1.08             |
| CDHR3        | LOW QUALITY PROTEIN: cadherin-related 3                                        | 3 138395915 138486889  | 0.144072              | 4.15             | 1.000000              | 1.88             | 0.060657              | -11.32           |
| LTK          | leukocyte tyrosine kinase receptor isoform X1                                  | 7 18409501 18419539    | 0.144072              | 2.20             | 0.298814              | 2.61             | 0.548381              | -1.49            |
| FARS2        | phenylalanine--tRNA ligase, mitochondrial                                      | 4 165204134 165604099  | 0.144072              | 1.13             | 0.988371              | 1.00             | 0.019672              | -1.22            |
| SMIM10L1     | small integral membrane protein 10-like protein 1                              | 11 11800663 11800869   | 0.144072              | -1.13            | 0.583227              | 1.09             | 0.563394              | -1.06            |
| ZBTB24       | zinc finger and BTB domain-containing protein 24                               | 4 13374950 13391650    | 0.144260              | 1.27             | 0.703314              | -1.14            | 0.197109              | 1.27             |
| LOC102142652 |                                                                                | 1 44350549 44354908    | 0.144526              | -2.48            | 0.910549              | -1.24            | 0.413868              | -2.07            |
| LOC102145618 |                                                                                | 3 20006094 20010824    | 0.144657              | 3.05             | 0.750612              | -1.66            | 0.584477              | 1.57             |
| GSG1L        | germ cell-specific gene 1-like protein isoform X1                              | 20 26721320 26997829   | 0.144692              | 2.06             | 0.638905              | 1.58             | 0.639630              | -1.34            |
| LYPD1        | uncharacterized protein LOC101865037                                           | 12 19022408 19052505   | 0.144735              | 2.21             | 0.556829              | -1.80            | 0.604891              | 1.40             |
| LOC102125561 |                                                                                | 9 17768479 17771145    | 0.144735              | -1.53            | 0.996692              | 1.00             | 0.074775              | -1.72            |
| MIR205HG     | uncharacterized protein MIR205HG                                               | 1 67983161 67986196    | 0.144979              | 5.68             | 0.906731              | 1.48             | 0.583122              | -2.31            |
| LOC107129728 |                                                                                | 5 59737162 59917761    | 0.144979              | -2.33            | 0.714334              | 1.56             | 0.018328              | -3.58            |
| MED12L       | mediator of RNA polymerase II transcription subunit 12L                        | 2 53355020 53690730    | 0.145144              | 1.46             | 0.971894              | -1.03            | 0.437508              | -1.28            |
| GFRA3        | GDNF family receptor alpha-3                                                   | 6 137339476 137361369  | 0.145177              | 2.10             | 0.644248              | -1.61            | 0.868817              | 1.12             |
| ZNF786       | zinc finger protein 786 isoform X1                                             | 3 182114152 182134225  | 0.145177              | 1.40             | 0.512912              | 1.32             | 0.563394              | 1.18             |
| FBXW4        | F-box/WD repeat-containing protein 4 isoform X1                                | 9 100561167 100648445  | 0.145177              | 1.31             | 0.933568              | 1.04             | 0.251407              | -1.28            |
| KANK1        | KN motif and ankyrin repeat domain-containing protein 1                        | 15 78431786 78499214   | 0.145177              | 1.30             | 0.993669              | 1.00             | 0.939361              | -1.02            |
| PLXNB2       | plexin-B2                                                                      | 10 564768 579699       | 0.145177              | 1.20             | 0.124709              | -1.35            | 0.819865              | 1.04             |
| TP53I1       | tumor protein p53-inducible protein 11                                         | 14 22652126 22655542   | 0.145177              | 1.19             | 0.134509              | -1.32            | 0.747624              | 1.05             |
| GTF3C1       | general transcription factor 3C polypeptide 1                                  | 20 26390625 26476400   | 0.145177              | 1.13             | 0.379215              | -1.14            | 0.670915              | -1.05            |
| TPRG1L       | tumor protein p63-regulated gene 1-like protein 1                              | 1 224854664 224857949  | 0.145177              | 1.10             | 0.982531              | -1.00            | 0.668883              | 1.04             |
| SNX11        | sorting nexin-11                                                               | 16 33453881 33462322   | 0.145177              | -1.15            | 0.808004              | -1.05            | 0.811988              | -1.03            |
| PSMD6        | 26S proteasome non-ATPase subunit 6                                            | 2 119374954 119387561  | 0.145177              | -1.16            | 0.917233              | -1.03            | 0.547908              | 1.08             |
| MRPL38       | 39S ribosomal protein L38, mitochondrial                                       | 16 73224727 73230771   | 0.145177              | -1.17            | 0.351804              | -1.20            | 0.107981              | -1.21            |
| NLK          | serine/threonine-protein kinase NLK isoform X1                                 | 16 24250311 24399925   | 0.145177              | -1.19            | 0.022951              | 1.46             | 0.561351              | 1.09             |
| ARHGAP12     | rho GTPase-activating protein 12 isoform X1                                    | 9 32396353 32494460    | 0.145177              | -1.32            | 0.900404              | 1.06             | 0.795686              | 1.07             |
| KDM4A        | lysine-specific demethylase 4A                                                 | 1 183907793 183960742  | 0.145203              | 1.18             | 0.360379              | -1.20            | 0.921476              | 1.02             |
| PVRL4        | nectin-4 isoform X1                                                            | 1 90562766 90579964    | 0.145337              | 1.34             | 0.130012              | -1.59            | 0.748744              | -1.09            |
| RAD51AP1     | RAD51-associated protein 1 isoform X1                                          | 11 4712576 4733515     | 0.145337              | -1.74            | 0.972407              | -1.04            | 0.355333              | 1.51             |
| TTBK1        | tau-tubulin kinase 1 isoform X3                                                | 4 127281572 127320929  | 0.145512              | 1.48             | 0.204721              | 1.88             | 0.824848              | 1.09             |
| LOC102145107 | myosin-1                                                                       | 16 10666769 10691081   | 0.145531              | 2.28             | 0.011806              | 4.79             | 0.126424              | -2.09            |
| KIF12        | kinesin-like protein KIF12 isoform X3                                          | 15 23482817 23490843   | 0.145556              | 1.91             | 0.304036              | -2.13            | 0.889359              | 1.09             |
| NAA20        | N-alpha-acetyltransferase 20                                                   | 10 42236612 42253034   | 0.145630              | -1.11            | 0.517571              | 1.09             | 0.946262              | -1.06            |
| HABP2        | hyaluronan-binding protein 2 isoform X1                                        | 9 112731696 112766810  | 0.145703              | 6.18             | 1.000000              | 4.37             | 0.950717              | 1.11             |



| Gene symbol  | Gene name                                                                             | chr_start_end          | Day3 adjusted P-value | Day3 fold change | Day5 adjusted P-value | Day5 fold change | Day7 adjusted P-value | Day7 fold change |
|--------------|---------------------------------------------------------------------------------------|------------------------|-----------------------|------------------|-----------------------|------------------|-----------------------|------------------|
| PRPF4B       | serine/threonine-protein kinase PRP4 homolog 10 kDa heat shock protein, mitochondrial | 4 166986380 167025780  | 0.145849              | -1.24            | 0.604950              | 1.16             | 0.568628              | 1.11             |
| LOC102114836 |                                                                                       | 11 3677345 3677653     | 0.145980              | -1.42            | 0.875533              | -1.10            | 0.931054              | 1.03             |
| KRT3         | keratin, type II cytoskeletal 3 isoform X1                                            | 11 51623798 51629835   | 0.146576              | 5.80             | 0.729546              | -1.83            | 0.798266              | -1.30            |
| NPM2         | nucleoplasm-2 isoform X1                                                              | 8 22158022 22173917    | 0.146692              | 3.32             | 1.000000              | 2.83             | 0.220689              | -2.89            |
| LOC107129603 | uncharacterized protein LOC107129603                                                  | 4 144304858 144305211  | 0.146692              | 1.61             | 0.860892              | 1.15             | 0.800762              | 1.12             |
| ZFX2         | zinc finger homeobox protein 2                                                        | 7 87240443 87253817    | 0.146692              | 1.41             | 0.703205              | -1.19            | 0.605452              | -1.15            |
| FAT2         | protocadherin Fat 2                                                                   | 6 150819083 150882971  | 0.146693              | 4.59             | 0.601688              | -3.20            | 0.489139              | -2.43            |
| FAM92B       | protein FAM92B                                                                        | 20 73425911 73442428   | 0.146739              | 6.24             | 0.925485              | 1.38             | 0.561607              | -2.47            |
| DLL3         | delta-like protein 3                                                                  | 19 40012412 40022294   | 0.146739              | 2.47             | 0.760138              | 1.45             | 0.828839              | 1.17             |
| DUSP7        | dual specificity protein phosphatase 7                                                | 2 107312001 107317545  | 0.146739              | -1.12            | 0.336148              | 1.13             | 0.000585              | 1.27             |
| IL7          | interleukin-7                                                                         | 8 79888440 79950303    | 0.146739              | -1.48            | 1.000000              | 1.00             | 0.624738              | 1.18             |
| NOC3L        | nucleolar complex protein 3 homolog isoform X1                                        | 9 92860713 92907472    | 0.146743              | -1.29            | 0.600706              | 1.19             | 0.612599              | 1.12             |
| HDHC2        | HD domain-containing protein 2                                                        | 4 29348583 29376147    | 0.146755              | -1.14            | 0.949552              | 1.02             | 0.273648              | -1.12            |
| TAP2         | antigen peptide transporter 2                                                         | 4 137991892 138003621  | 0.146777              | 1.20             | 0.812352              | 1.07             | 0.017414              | 1.35             |
| LOC102119031 |                                                                                       | 16 75580031 75591955   | 0.146795              | 2.19             | 0.778065              | 1.38             | 0.874845              | 1.12             |
| WIPF2        | WAS/WASL-interacting protein family member 2                                          | 16 51894464 51923943   | 0.146795              | 1.19             | 0.953682              | -1.02            | 0.586517              | 1.08             |
| TRIM68       | E3 ubiquitin-protein ligase TRIM68                                                    | 14 66172856 66178070   | 0.146815              | 1.20             | 0.766127              | -1.09            | 0.004244              | 1.41             |
| LOC107128201 |                                                                                       | 19 7185524 7189553     | 0.146816              | 6.00             | 1.000000              | -1.06            | 1.000000              | -1.94            |
| LOC102137822 | protein FRA10AC1 isoform X3                                                           | 9 92184880 92218845    | 0.146816              | -1.19            | 0.327647              | 1.22             | 0.604891              | 1.08             |
| LOC102133124 | symplesin isoform X2                                                                  | 19 46720991 46754968   | 0.146843              | 1.38             | 0.771774              | -1.15            | 0.543199              | 1.18             |
| LACC1        | laccase domain-containing protein 1                                                   | 17 23062514 23071748   | 0.146843              | -1.58            | 0.851229              | -1.15            | 0.778236              | 1.12             |
| TMEM199      | transmembrane protein 199 isoform X1                                                  | 16 24579769 24583439   | 0.146847              | -1.11            | 0.121460              | -1.19            | 0.328273              | -1.09            |
| LOC102125377 | phosphatidylinositol 3,4,5-trisphosphate 5-phosphatase 1                              | 0 18213 89753          | 0.146848              | 1.35             | 0.834460              | 1.11             | 0.238251              | 1.32             |
| LOC102122663 |                                                                                       | 13 6889477 6894797     | 0.146936              | 1.84             | 0.801126              | 1.27             | 0.000002              | -5.59            |
| FXYP1        | phospholemmann                                                                        | 19 35582689 35588339   | 0.146936              | 1.84             | 0.499075              | 1.68             | 0.995875              | 1.00             |
| MYOZ3        | myozenin-3 isoform X1                                                                 | 6 150008963 150024238  | 0.146936              | 1.61             | 0.600387              | 1.39             | 0.666368              | -1.19            |
| PIK3C2B      | phosphatidylinositol 4-phosphate 3-kinase type II beta isoform X1                     | 1 62904653 62950277    | 0.146936              | 1.30             | 0.754553              | 1.13             | 0.443076              | 1.18             |
| LOC102122033 | cytosolic beta-glucosidase isoform X1                                                 | 5 21840695 21964886    | 0.146937              | 2.63             | 0.029761              | 28.92            | 0.756724              | 1.31             |
| MFAP1        | microfibrillar-associated protein 1                                                   | 7 20757443 20778624    | 0.146961              | 1.17             | 0.811777              | 1.06             | 0.381179              | 1.12             |
| TMEM87B      | transmembrane protein 87B isoform X1                                                  | 13 16236423 16305287   | 0.146961              | -1.18            | 0.988366              | 1.00             | 0.538429              | 1.09             |
| LRRC8C       | volume-regulated anion channel subunit LRRC8C                                         | 1 137591176 137625706  | 0.146961              | -1.27            | 0.038674              | 1.65             | 0.405393              | 1.18             |
| OSGIN2       | oxidative stress-induced growth inhibitor 2                                           | 8 91057968 91080012    | 0.146961              | -1.31            | 0.492921              | 1.26             | 0.896628              | 1.03             |
| PSPN         | persephin                                                                             | 19 6549559 6550261     | 0.146961              | -1.79            | 0.879651              | 1.15             | 0.063908              | -2.00            |
| LOC101865442 | uncharacterized protein LOC101865442                                                  | 12 19021398 19021805   | 0.147260              | 2.17             | 0.565443              | -1.77            | 0.592098              | 1.40             |
| ABCB4        | phosphatidylcholine translocator ABCB4                                                | 3 124583851 124653659  | 0.147260              | 1.72             | 0.824723              | 1.21             | 0.636003              | 1.23             |
| LOC107126954 |                                                                                       | 12 109282315 109296506 | 0.147394              | 2.92             | 0.922796              | -1.19            | 0.914864              | -1.12            |
| TSPYL2       | testis-specific Y-encoded-like protein 2                                              | X 52142166 52147755    | 0.147641              | 1.33             | 0.972407              | 1.02             | 0.408555              | -1.21            |
| IGIP         | IgA-inducing protein homolog                                                          | 6 139265798 139265959  | 0.147641              | -1.27            | 0.040075              | 1.64             | 0.388448              | 1.20             |
| LOC107127173 |                                                                                       | 13 100825931 100835341 | 0.147641              | -1.85            | 0.791655              | 1.27             | 0.140176              | -1.99            |
| ASF1B        | histone chaperone ASF1B                                                               | 19 14476026 14490371   | 0.147795              | -1.31            | 0.279752              | -1.41            | 0.486899              | 1.17             |
| LOC102144796 |                                                                                       | 14 12428 16870         | 0.147886              | 1.59             | 0.692227              | -1.30            | 0.626811              | -1.24            |
| FAM32A       | protein FAM32A                                                                        | 19 16443557 16449055   | 0.148069              | 1.18             | 0.485668              | -1.16            | 0.814839              | -1.04            |
| LACTB2       | beta-lactamase-like protein 2                                                         | 8 71874255 71904055    | 0.148232              | -1.27            | 0.778065              | 1.11             | 0.921500              | 1.02             |
| LOC102146320 | V-set and transmembrane domain-containing protein 1                                   | 0 1289 2673            | 0.148303              | 2.45             | 0.093987              | -5.73            | 0.846819              | -1.18            |
| MPP4         | MAGUK p55 subfamily member 4                                                          | 12 91058493 91111586   | 0.148303              | -2.07            | 0.976880              | 1.04             | 0.178570              | -2.16            |
| TADA2B       | transcriptional adapter 2-beta                                                        | 5 5896809 5908011      | 0.148424              | 1.16             | 0.861920              | 1.04             | 0.167451              | 1.17             |
| TBC1D13      | TBC1 domain family member 13 isoform X1                                               | 15 10347549 10369044   | 0.148424              | 1.14             | 0.439869              | -1.14            | 0.679130              | 1.05             |
| ACAD8        | isobutyryl-CoA dehydrogenase, mitochondrial                                           | 14 129974042 129985239 | 0.148445              | 1.20             | 0.866137              | 1.05             | 0.933708              | 1.02             |
| LOC102124550 | myosin regulatory light chain 12A isoform X1                                          | 18 64450417 64453928   | 0.148445              | -1.17            | 0.111973              | 1.30             | 0.855975              | -1.03            |
| PHGDH        | D-3-phosphoglycerate dehydrogenase isoform X1                                         | 1 106980450 107010385  | 0.148708              | 1.26             | 0.706672              | -1.13            | 0.421583              | 1.16             |
| CCAR1        | cell division cycle and apoptosis regulator 1                                         | 9 67064557 67227244    | 0.148766              | -1.14            | 0.863789              | 1.04             | 0.981474              | -1.00            |
| CEBPG        | CCAAT/enhancer-binding protein gamma                                                  | 19 33744387 33744839   | 0.148766              | -1.15            | 0.491465              | 1.13             | 0.503481              | -1.08            |
| SEMA3A       | semaphorin-3A                                                                         | 3 127895989 128115586  | 0.148766              | -1.28            | 0.047093              | 1.63             | 0.146688              | 1.30             |
| FPR1         | fMet-Leu-Phe receptor                                                                 | 19 52468806 52469864   | 0.148766              | -1.39            | 0.663957              | 1.22             | 0.119468              | -1.47            |
| LOC102130401 | uncharacterized protein LOC102130401 isoform X1                                       | 7 71558736 71561168    | 0.148766              | -1.54            | 0.625616              | -1.31            | 0.900170              | 1.05             |
| C14H11orf94  | uncharacterized protein C14orf94 homolog 1                                            | 14 21696544 21697218   | 0.148791              | 1.78             | 0.816727              | -1.22            | 0.783259              | -1.17            |
| F2RL1        | proteinase-activated receptor 2                                                       | 6 75026139 75040429    | 0.148791              | -1.39            | 0.505371              | -1.07            | 0.310401              | 1.31             |
| MAGI2        | membrane-associated guanylate kinase, with multiple catalytic domains 2               | 3 132738803 134229153  | 0.148894              | -1.36            | 0.878605              | 1.08             | 0.648087              | 1.13             |
| GTF2A1       | transcription initiation factor IIA subunit 1                                         | 7 146041239 146081982  | 0.148898              | -1.43            | 0.565845              | 1.31             | 0.321313              | 1.33             |
| GTF3C6       | general transcription factor 3C polypeptide 6                                         | 4 14866978 14876780    | 0.149071              | -1.27            | 0.571155              | -1.20            | 0.882032              | -1.04            |
| ADCY9        | adenylate cyclase type 9 isoform X2                                                   | 20 4242443 4287134     | 0.149095              | 1.36             | 0.958714              | -1.03            | 0.583398              | -1.15            |
| LOC102124883 | 26S protease regulatory subunit 10B                                                   | 7 116892745 116893914  | 0.149096              | -1.31            | 0.960750              | 1.03             | 0.666172              | 1.11             |
| CRB2         | protein crumbs homolog 2 isoform X2                                                   | 15 12667456 12688272   | 0.149296              | 2.34             | 0.889585              | -1.23            | 0.219277              | -2.25            |
| OAZ2         | ornithine decarboxylase antizyme 2 isoform X1                                         | 7 42154944 42169655    | 0.149296              | 1.19             | 0.805241              | -1.07            | 0.530344              | -1.00            |
| PSD4         | PH and SEC7 domain-containing protein 4                                               | 13 17321725 17350161   | 0.149296              | 1.19             | 0.369585              | -1.20            | 0.079288              | 1.24             |
| ALG9         | alpha-1,2-mannosyltransferase ALG9 isoform X1                                         | 14 107761564 107851506 | 0.149296              | -1.17            | 0.965551              | 1.01             | 0.259530              | 1.15             |
| TMTC4        | transmembrane and TPR repeat-containing protein 4                                     | 17 83210390 83274789   | 0.149296              | -1.27            | 0.966616              | 1.02             | 0.896916              | 1.03             |
| RNF217       | probable E3 ubiquitin-protein ligase RNF217                                           | 4 29012817 29142165    | 0.149296              | -1.35            | 0.678997              | 1.19             | 0.687967              | 1.11             |
| UNC13C       | protein unc-13 homolog C isoform X1                                                   | 7 31003982 31667651    | 0.149449              | 7.00             | 0.199014              | 9.13             | 0.791326              | -1.47            |
| NFXL1        | NF-X1-type zinc finger protein NFXL1 isoform X1                                       | 5 47927624 47993861    | 0.149678              | -1.19            | 0.682774              | 1.10             | 0.260698              | 1.17             |
| NMRAL1       | nmrA-like family domain-containing protein 1                                          | 20 4716350 4730615     | 0.149846              | 1.37             | 0.913439              | -1.06            | 0.282286              | -1.31            |
| PVRL1        | nectin-1                                                                              | 14 115726110 115789869 | 0.149937              | 1.34             | 0.151139              | 1.58             | 0.952706              | -1.02            |
| SEC22B       | vesicle-trafficking protein SEC22b                                                    | 1 106538435 106558709  | 0.149937              | -1.37            | 0.985600              | 1.01             | 0.631066              | 1.14             |
| REEP1        | receptor expression-enhancing protein 1                                               | 13 23162274 23207874   | 0.150002              | 1.54             | 0.456518              | 1.48             | 0.537203              | -1.25            |
| RDH14        | retinol dehydrogenase 14                                                              | 13 92434536 92439990   | 0.150002              | -1.18            | 0.549740              | 1.14             | 0.848895              | -1.03            |
| PELI1        | E3 ubiquitin-protein ligase pellico homolog 1                                         | 13 45907983 45922475   | 0.150002              | -1.31            | 0.649648              | 1.19             | 0.622242              | 1.12             |
| ISOC2        | isochorismatase domain-containing protein 2                                           | 19 56298302 56305430   | 0.150173              | 1.50             | 0.810782              | -1.16            | 0.257529              | -1.44            |
| SP2          | transcription factor Sp2 isoform X1                                                   | 16 33219497 33253412   | 0.150173              | 1.16             | 0.995128              | 1.00             | 0.695355              | 1.05             |
| OSTM1        | osteopetrosis-associated transmembrane protein 1                                      | 4 11955192 11988454    | 0.150173              | -1.23            | 0.411047              | 1.23             | 0.372789              | 1.16             |
| NRC2CAP      | nuclear receptor 2C2-associated protein 1                                             | 19 19687472 19688602   | 0.150173              | -1.33            | 0.944206              | -1.04            | 0.853442              | 1.05             |
| MFSD11       | UNC93-like protein MFSD11 isoform X1                                                  | 16 74119473 74157340   | 0.150247              | -1.13            | 0.615357              | -1.08            | 0.368476              | -1.09            |
| ITGA2        | integrin alpha-2                                                                      | 6 52379312 52480739    | 0.150459              | -1.97            | 0.728077              | 1.41             | 0.700817              | 1.26             |
| AP3M2        | AP-3 complex subunit mu-2 isoform X3                                                  | 8 43145717 43161003    | 0.150585              | 1.24             | 0.385822              | 1.25             | 0.646875              | -1.09            |
| FASLG        | tumor necrosis factor ligand superfamily member 1                                     | 1 30635867 30642669    | 0.150595              | 1.43             | 0.975410              | -1.02            | 0.260698              | 1.36             |
| PRDX1        | peroxiredoxin-1 isoform X1                                                            | 1 182003834 182010950  | 0.150595              | -1.30            | 0.343356              | -1.35            | 0.369173              | -1.21            |
| C19H1orf24   | uncharacterized membrane protein C19orf24                                             | 19 1051565 1054754     | 0.150675              | -1.26            | 0.496440              | -1.22            | 0.448740              | -1.15            |
| LOC102123120 | napsin-A isoform X2                                                                   | 19 51178169 51184839   | 0.150675              | -2.32            | 0.574779              | -1.87            | 0.871675              | -1.14            |

| Gene symbol  | Gene name                                                      | chr_start_end         | Day3 adjusted P-value | Day3 fold change | Day5 adjusted P-value | Day5 fold change | Day7 adjusted P-value | Day7 fold change |
|--------------|----------------------------------------------------------------|-----------------------|-----------------------|------------------|-----------------------|------------------|-----------------------|------------------|
| CLDN2        | claudin-2 isoform X1                                           | X 104051226 104121208 | 0.150792              | -2.39            | 0.700694              | -1.61            | 0.971565              | 1.03             |
| LOC102130439 | zinc finger protein 788-like isoform X1                        | 19 12382831 12402198  | 0.150849              | 1.53             | 0.241704              | -1.76            | 0.863133              | 1.07             |
| FGFR3        | fibroblast growth factor receptor 3 isoform X1                 | 5 1808151 1821018     | 0.150849              | 1.51             | 0.464965              | 1.46             | 0.823012              | -1.09            |
| POLR3A       | DNA-directed RNA polymerase III subunit alpha                  | 9 57579244 57630875   | 0.150849              | 1.21             | 0.917016              | 1.04             | 0.010902              | 1.38             |
| ZNF516       | zinc finger protein 516 isoform X1                             | 18 3662854 3743548    | 0.150849              | 1.10             | 0.904043              | 1.02             | 0.921476              | 1.01             |
| CCT2         | T-complex protein 1 subunit beta                               | 11 68641583 68657135  | 0.150849              | -1.24            | 0.831479              | 1.08             | 0.834287              | 1.04             |
| PI3          | elafin                                                         | 10 76891419 76892625  | 0.150849              | -1.79            | 0.798468              | -1.26            | 0.627614              | -1.28            |
| LOC107130531 | uncharacterized protein LOC107130531                           | 8 8785773 8853844     | 0.150849              | -1.89            | 0.017278              | -5.76            | 0.814839              | 1.17             |
| LOC107128281 | uncharacterized protein LOC107128281                           | 19 53634056 53640670  | 0.150849              | -1.98            | 0.830736              | -1.27            | 0.020727              | 3.07             |
| C4H6orf118   | uncharacterized protein C6orf118 homolog                       | 4 5619537 5641076     | 0.150888              | 5.56             | 0.788804              | 2.34             | 0.967163              | 1.08             |
| HIPK3        | homeodomain-interacting protein kinase 3                       | 14 34091204 34190664  | 0.150888              | -1.46            | 0.196564              | 1.72             | 0.600285              | 1.18             |
| SPEF2        | sperm flagellar protein 2 isoform X7                           | 6 36013390 36204120   | 0.150961              | 1.73             | 0.083913              | 2.72             | 0.932087              | -1.05            |
| LOC102139649 | leydig cell tumor 10 kDa protein homolog                       | 13 29197139 29197438  | 0.150961              | 1.37             | 0.765399              | -1.17            | 0.354834              | -1.27            |
| RPL24        | 60S ribosomal protein L24                                      | 2 170467792 170473267 | 0.150961              | 1.15             | 0.630370              | -1.10            | 0.331400              | -1.12            |
| BCL10        | B-cell lymphoma/leukemia 10                                    | 1 141972271 141981046 | 0.150961              | -1.21            | 0.929494              | 1.03             | 0.922723              | -1.02            |
| RPF2         | ribosome production factor 2 homolog isoform X1                | 4 14888761 14932890   | 0.151068              | -1.45            | 0.885953              | 1.10             | 0.973338              | 1.01             |
| QRICH1       | glutamine-rich protein 1                                       | 2 104199665 104238615 | 0.151305              | 1.10             | 0.872607              | -1.03            | 0.415197              | 1.07             |
| HERC4        | probable E3 ubiquitin-protein ligase HERC4                     | 9 67902284 68058550   | 0.151446              | -1.22            | 0.677945              | 1.12             | 0.681690              | -1.07            |
| PCGF5        | polycomb group RING finger protein 5 isoform X1                | 9 89768229 89840447   | 0.151446              | -1.30            | 0.057545              | 1.68             | 0.367045              | 1.21             |
| C2H3orf18    | uncharacterized protein LOC101866674                           | 2 105809219 105812049 | 0.151530              | 1.89             | 0.350857              | 2.05             | 0.645272              | -1.29            |
| IQCC         | IQ domain-containing protein C isoform X1                      | 1 195805186 195807618 | 0.151530              | 1.33             | 0.808446              | 1.12             | 0.589882              | -1.14            |
| FARP1        | FERM, RhoGEF and pleckstrin domain-containing protein 1        | 17 80835449 81070992  | 0.151530              | 1.26             | 0.307476              | 1.32             | 0.973730              | -1.01            |
| DNAL4        | dynein light chain 4, axonemal                                 | 10 12434119 12437681  | 0.151530              | 1.20             | 0.585067              | -1.14            | 0.551381              | -1.10            |
| TRERF1       | transcriptional-regulating factor 1 isoform X1                 | 4 12834344 128384965  | 0.151530              | 1.19             | 0.310650              | 1.24             | 0.034043              | 1.31             |
| CYP2C76      | cytochrome P450 2C3-like precursor                             | 9 8229 20419          | 0.151701              | 2.59             | 0.879354              | -1.27            | 0.063631              | -3.93            |
| EIF2S3       | eukaryotic translation initiation factor 2 subunit 3           | X 22032683 22056377   | 0.151740              | -1.14            | 0.330840              | -1.17            | 0.807312              | -1.03            |
| TLCD2        | TLC domain-containing protein 2                                | 16 1595367 1597781    | 0.151740              | -1.38            | 0.745066              | 1.17             | 0.283353              | -1.32            |
| EHMT2        | histone-lysine N-methyltransferase EHMT2                       | 4 138958225 138976594 | 0.151791              | 1.17             | 0.438694              | -1.16            | 0.917055              | -1.02            |
| BDP1         | transcription factor TFIIIB component B"                       | 6 69600214 69711595   | 0.152206              | -1.24            | 0.108600              | 1.45             | 0.488982              | 1.13             |
| HAVCR2       | hepatitis A virus cellular receptor 2                          | 6 156473929 156495807 | 0.152237              | -1.62            | 0.831558              | -1.18            | 0.989847              | 1.01             |
| LOC107130080 | protocadherin gamma-A7                                         | 6 140504608 140507061 | 0.152325              | 1.58             | 0.404759              | 1.58             | 0.238926              | 1.50             |
| NOP9         | nucleolar protein 9 isoform X1                                 | 7 88085200 88090370   | 0.152325              | 1.08             | 0.061392              | 1.17             | 0.495225              | 1.05             |
| KCTD9        | BTB/POZ domain-containing protein KCTD9                        | 8 25825947 25854495   | 0.152325              | -1.20            | 0.411140              | 1.21             | 0.918276              | 1.02             |
| CCTD109B     | uncharacterized protein LOC101925331                           | 5 108976930 109083020 | 0.152325              | -1.25            | 0.817959              | 1.08             | 0.640056              | 1.09             |
| FPGT         | fucose-1-phosphate guanylyltransferase                         | 1 153061520 153069191 | 0.152325              | -1.33            | 0.975411              | 1.02             | 0.027171              | 1.57             |
| ATF5         | cyclic AMP-dependent transcription factor 5                    | 19 50812979 50815300  | 0.152325              | -1.34            | 0.221559              | -1.50            | 0.898222              | -1.04            |
| NDFV2        | NADH dehydrogenase [ubiquinone] flavoprotein 2                 | 18 70278994 70312716  | 0.152354              | -1.16            | 0.650995              | -1.10            | 0.479109              | -1.09            |
| COLGALT1     | procollagen galactosyltransferase 1                            | 19 17904120 17917177  | 0.152354              | -1.28            | 0.240963              | -1.39            | 0.977740              | -1.01            |
| GRHL2        | grainyhead-like protein 2 homolog isoform X1                   | 8 102639730 102821352 | 0.152360              | 1.32             | 0.119070              | -1.59            | 0.301105              | -1.26            |
| PCBP2        | poly(rC)-binding protein 2 isoform X1                          | 11 52322844 52348623  | 0.152392              | 1.09             | 0.318215              | -1.11            | 0.268498              | -1.08            |
| LOC102141543 | Ig lambda chain V region 4A-like                               | 10 29678374 29678842  | 0.152468              | 1.64             | 0.025506              | 2.78             | 0.482120              | -1.31            |
| MTMR12       | myotubularin-related protein 12 isoform X1                     | 6 32921550 33007480   | 0.152596              | 1.25             | 0.800876              | 1.09             | 0.908879              | 1.03             |
| ATP6V1C1     | V-type proton ATPase subunit C 1 isoform X1                    | 8 104205732 104233368 | 0.152630              | -1.28            | 0.922796              | 1.04             | 0.869342              | 1.04             |
| USPL1        | SUMO-specific isopeptidase USPL1 isoform X1                    | 17 10215841 10251988  | 0.152639              | -1.16            | 0.074030              | 1.32             | 0.617468              | 1.07             |
| RTN3         | reticulon-3 isoform X4                                         | 14 10831962 10936187  | 0.152659              | -1.09            | 0.840235              | 1.03             | 0.651732              | -1.04            |
| LOC107126395 | uncharacterized protein LOC107126395                           | 8 37833973 37837147   | 0.152964              | 5.13             | 1.000000              | 3.50             | 0.966206              | 1.06             |
| ANXA2        | annexin A2                                                     | 7 37687868 37724686   | 0.153059              | -1.23            | 0.663338              | -1.13            | 0.042695              | -1.35            |
| ISCA2        | iron-sulfur cluster assembly 2 homolog, nuclear                | 7 139177470 139178692 | 0.153137              | -1.32            | 0.057346              | -1.71            | 0.093960              | -1.41            |
| SLC35E4      | solute carrier family 35 member E4                             | 10 20793406 20802843  | 0.153137              | -1.33            | 0.451097              | -1.30            | 0.115053              | -1.40            |
| IDO1         | indoleamine 2,3-dioxygenase 1                                  | 8 40871221 40887337   | 0.153308              | -1.82            | 0.126510              | -2.69            | 0.901031              | -1.08            |
| SLC38A7      | putative sodium-coupled neutral amino acid transporter 7       | 20 46737118 46755797  | 0.153326              | -1.27            | 0.156802              | -1.45            | 0.119204              | -1.32            |
| LOC102126529 | uncharacterized protein LOC102126529                           | 12 70092229 70117320  | 0.153419              | 2.21             | 0.757815              | -1.34            | 0.563641              | 1.34             |
| KDELR2       | ER lumen protein-retaining receptor 2 isoform X1               | 3 41788096 41810582   | 0.153419              | -1.35            | 0.833594              | 1.11             | 0.696092              | 1.11             |
| LOC102128802 | tubulin alpha-1C chain                                         | 11 48116980 48124740  | 0.153523              | -1.61            | 0.653806              | -1.35            | 0.969129              | 1.02             |
| H3F3A        | histone H3.3                                                   | 1 84878796 84887692   | 0.153523              | 1.17             | 0.192548              | -1.26            | 0.670720              | 1.06             |
| PLCB2        | 1-phosphatidylinositol 4,5-bisphosphate phospholipase C beta 2 | 7 17093637 17112775   | 0.153547              | 1.27             | 0.813035              | -1.09            | 0.592595              | 1.12             |
| POLR2A       | DNA-directed RNA polymerase II subunit alpha                   | 16 7545756 7586045    | 0.153547              | 1.22             | 0.447201              | -1.21            | 0.413969              | 1.14             |
| LOC102127873 | uncharacterized protein LOC102127873                           | 20 31892212 31893834  | 0.153547              | -1.59            | 0.022984              | 2.80             | 0.000001              | -3.82            |
| PABPC4       | polyadenylate-binding protein 4 isoform X1                     | 1 188204520 188219296 | 0.153605              | -1.10            | 0.185636              | -1.16            | 0.380960              | -1.07            |
| FKTN         | fukutin isoform X4                                             | 15 32078003 32131353  | 0.153605              | -1.22            | 0.945534              | -1.03            | 0.498446              | 1.12             |
| LOC102120828 | uncharacterized protein LOC102120828                           | 17 9352224 9378190    | 0.153605              | -1.53            | 0.358831              | -1.60            | 0.122481              | -1.66            |
| ENO2         | gamma-enolase                                                  | 11 7227858 7235112    | 0.153612              | -1.39            | 0.820558              | 1.13             | 0.980993              | -1.01            |
| PAPOLA       | poly(A) polymerase alpha isoform X1                            | 7 161602628 161665893 | 0.153695              | -1.23            | 0.563634              | 1.17             | 0.415201              | 1.15             |
| RBM38        | RNA-binding protein 38 isoform X1                              | 10 89275149 89290792  | 0.153819              | 1.25             | 0.297373              | -1.32            | 0.971841              | 1.01             |
| FAM65A       | protein FAM65A isoform X3                                      | 20 55707570 55716388  | 0.153819              | 1.21             | 0.331155              | 1.24             | 0.966458              | -1.01            |
| PHLDA2       | pleckstrin homology-like domain family A member 2              | 14 2892437 2892972    | 0.153819              | -1.98            | 0.976880              | -1.04            | 0.827658              | -1.15            |
| RINL         | ras and Rab interactor-like protein isoform X1                 | 19 39345038 39354655  | 0.153828              | 1.30             | 0.112620              | -1.55            | 0.502934              | 1.16             |
| DDX20        | probable ATP-dependent RNA helicase DDX20                      | 1 115015109 115026112 | 0.153828              | -1.14            | 0.513366              | 1.12             | 0.378930              | 1.10             |
| MYNN         | myoneurin isoform X1                                           | 2 73970480 73983826   | 0.153953              | -1.19            | 0.414433              | 1.19             | 0.566235              | 1.09             |
| DEDD2        | DNA-binding death effector domain-containing protein 2         | 19 42712549 42731843  | 0.153968              | 1.13             | 0.993669              | -1.00            | 0.021718              | -1.23            |
| MPDU1        | mannose-6-phosphate utilization defect 1                       | 16 7653759 7657456    | 0.153968              | -1.19            | 0.326649              | -1.23            | 0.219818              | -1.18            |
| RRAGC        | ras-related GTP-binding protein C isoform X1                   | 1 188964404 188984669 | 0.153968              | -1.20            | 0.830080              | -1.07            | 0.914191              | 1.02             |
| NFU1         | NFU1 iron-sulfur cluster scaffold homolog                      | 13 40527317 40573384  | 0.153968              | -1.20            | 0.830732              | 1.07             | 0.757252              | -1.05            |
| LOC102117378 | uncharacterized protein LOC102117378                           | 0 13008 14139         | 0.153968              | -3.52            | 1.000000              | 1.41             | 0.826537              | -1.28            |
| LOC107128396 | uncharacterized protein LOC107128396                           | 20 77299300 77302326  | 0.154077              | 5.24             | 1.000000              | -2.54            | 0.185457              | -5.14            |
| LOC107127425 | uncharacterized protein LOC107127425                           | 14 99851095 99864734  | 0.154100              | 2.28             | 0.395223              | 2.66             | 0.912894              | -1.11            |
| LOC102122664 | alcohol dehydrogenase 1A                                       | 5 98548370 98562752   | 0.154362              | 2.12             | 0.777740              | -1.39            | 0.867804              | -1.13            |
| FITM2        | fat storage-inducing transmembrane protein 2                   | 10 76010125 76013669  | 0.154362              | 1.26             | 0.968746              | -1.02            | 0.412241              | 1.17             |
| SLC25A53     | solute carrier family 25 member 53 isoform X1                  | X 101018698 101047295 | 0.154362              | 1.23             | 0.550792              | 1.18             | 0.862371              | 1.04             |
| LOC107129476 | uncharacterized protein LOC107129476                           | 4 126450913 126469811 | 0.154362              | -6.07            | 1.000000              | -1.06            | 0.420910              | 2.42             |
| C7H14orf159  | UPF0317 protein C14orf159 homolog, mouse                       | 7 156128293 156189435 | 0.154478              | 1.21             | 0.968272              | -1.02            | 0.822828              | 1.04             |
| PPA2         | uncharacterized protein LOC101925247                           | 5 104799161 104961409 | 0.154478              | -1.27            | 0.876045              | -1.07            | 0.581171              | 1.12             |
| TACR1        | substance-P receptor                                           | 13 34696979 34843851  | 0.154507              | 1.63             | 0.807519              | 1.21             | 0.304797              | 1.49             |
| EIF4B        | eukaryotic translation initiation factor 4B                    | 11 51841960 51876804  | 0.154507              | 1.22             | 0.674906              | -1.13            | 0.572727              | 1.10             |
| CIH1orf167   | LOW QUALITY PROTEIN: uncharacterized protein LOC101925247      | 1 216332791 216359805 | 0.154597              | 1.79             | 0.236037              | 2.51             | 0.338238              | 1.59             |
| LOC102131950 | uncharacterized protein LOC102131950                           | 1 184101354 184108388 | 0.154740              | 5.88             | 0.484636              | -2.89            | 0.007394              | -21.00           |
| LOC107130976 | uncharacterized protein LOC107130976                           | 10 8264365 8269890    | 0.154740              | 1.88             | 0.137512              | 3.36             | 0.562534              | -1.43            |

| Gene symbol  | Gene name                                   | chr_start_end          | Day3 adjusted P-value | Day3 fold change | Day5 adjusted P-value | Day5 fold change | Day7 adjusted P-value | Day7 fold change |
|--------------|---------------------------------------------|------------------------|-----------------------|------------------|-----------------------|------------------|-----------------------|------------------|
| LOC107129914 |                                             | 6 17889650 17931473    | 0.154825              | 8.73             | 1.000000              | 1.43             | 1.000000              | 3.18             |
| RSPO2        | R-spondin-2 isoform X2                      | 8 109021274 109188129  | 0.154825              | 1.77             | 0.491246              | 1.65             | 0.618434              | 1.28             |
| SLC6A13      | sodium- and chloride-dependent GABA t       | 11 222771 260242       | 0.154850              | -1.23            | 0.278977              | 1.30             | 0.457384              | 1.14             |
| DLD          | dihydropyridol dehydrogenase, mitochondr    | 3 140360463 140390197  | 0.154850              | -1.33            | 0.377565              | 1.36             | 0.496552              | 1.18             |
| CCDC39       | coiled-coil domain-containing protein 39    | 2 85181911 85245355    | 0.154858              | 1.70             | 0.631878              | -1.42            | 0.958180              | 1.03             |
| CIH1orf74    | UPF0739 protein C1orf74 homolog             | 1 68359294 68360106    | 0.154858              | -1.18            | 0.632347              | 1.11             | 0.821606              | -1.04            |
| RBKS         | ribokinase isoform X4                       | 13 82932499 83064184   | 0.154858              | -1.37            | 0.898299              | -1.07            | 0.560487              | -1.17            |
| NAP1L3       | nucleosome assembly protein 1-like 3        | X 90780605 90782134    | 0.154858              | -1.42            | 0.686975              | 1.22             | 0.762836              | 1.10             |
| PLPP2        | lipid phosphate phosphohydrolase 2 isofo    | 19 15736 30098         | 0.154914              | -1.29            | 0.540336              | -1.23            | 0.005203              | -1.62            |
| FCRLA        | Fc receptor-like A isoform X2               | 1 90029552 90036033    | 0.154938              | 1.87             | 0.264775              | -2.29            | 0.567317              | 1.36             |
| SLC6A15      |                                             | 11 84094808 84167154   | 0.154956              | 4.27             | 1.000000              | -7.66            | 1.000000              | 1.78             |
| RIT1         | GTP-binding protein Rit1 isoform X1         | 1 95865523 95876189    | 0.154956              | -1.20            | 0.803911              | 1.08             | 0.621570              | 1.08             |
| LOC102126330 | LOW QUALITY PROTEIN: importin sub           | 16 62086630 62098647   | 0.154956              | -1.41            | 0.083990              | -1.89            | 0.108160              | -1.51            |
| LOC107127953 |                                             | 17 29019796 29029477   | 0.154965              | 1.94             | 0.980965              | 1.03             | 0.476477              | 1.52             |
| LOC102116036 |                                             | 14 6404703 6409241     | 0.154965              | 1.60             | 0.427833              | -1.64            | 0.778888              | 1.14             |
| LAMP2        | lysosome-associated membrane glycoprot      | X 117100634 117140782  | 0.155086              | -1.36            | 0.394453              | 1.38             | 0.394200              | 1.24             |
| ASIC2        | acid-sensing ion channel 2 isoform X1       | 16 29391017 30525172   | 0.155148              | 1.62             | 0.452694              | 1.46             | 0.638720              | -1.17            |
| GNAI3        | guanine nucleotide-binding protein G(k) s   | 1 117157603 117203135  | 0.155148              | -1.31            | 0.585103              | 1.22             | 0.400485              | 1.21             |
| SLC19A1      | folate transporter 1                        | 3 1218063 1239147      | 0.155221              | 1.49             | 0.005911              | -2.81            | 0.314404              | -1.38            |
| LOC102133232 | LOW QUALITY PROTEIN: X-ray repair           | 9 91725680 91728839    | 0.155641              | 2.38             | 0.180135              | 3.91             | 0.801101              | -1.23            |
| C11H12orf75  | overexpressed in colon carcinoma 1 prote    | 11 109050161 109088172 | 0.155732              | 1.27             | 0.011296              | -1.75            | 0.300361              | -1.21            |
| SMIM14       | small integral membrane protein 14          | 5 39193048 39237290    | 0.155737              | -1.30            | 0.992863              | 1.00             | 0.880697              | -1.04            |
| RBFOX2       | RNA binding protein fox-1 homolog 2 iso     | 10 15233393 15523685   | 0.155840              | 1.20             | 0.655388              | 1.12             | 0.448532              | 1.12             |
| CENPA        | histone H3-like centromere protein A        | 13 84092325 84099054   | 0.155895              | -1.48            | 0.090823              | -2.01            | 0.995563              | 1.00             |
| C18H18orf25  | uncharacterized protein C18orf25 homolo     | 18 35617325 35666091   | 0.155931              | -1.18            | 0.399826              | 1.19             | 0.554515              | 1.09             |
| CIB2         | calcium and integrin-binding family mem     | 7 56440398 56465222    | 0.155973              | 1.34             | 0.777541              | -1.14            | 0.621839              | -1.13            |
| CADPS        | calcium-dependent secretion activator 1 is  | 2 11777910 118264016   | 0.155981              | 1.94             | 0.601410              | 1.58             | 0.460714              | -1.49            |
| PATZ1        | POZ-, AT hook-, and zinc finger-containi    | 10 20050637 20070159   | 0.156011              | 1.20             | 0.663957              | -1.12            | 0.788802              | 1.05             |
| FAM81A       | protein FAM81A isoform X1                   | 7 36652727 36719381    | 0.156041              | 1.49             | 0.804441              | 1.17             | 0.547411              | 1.22             |
| KLF1         | Kruppel-like factor 1                       | 19 13112921 13115182   | 0.156123              | -2.04            | 0.686010              | -1.51            | 0.597790              | -1.39            |
| PHF5A        | PHD finger-like domain-containing protei    | 10 9637242 9646118     | 0.156205              | -1.18            | 0.581775              | -1.13            | 0.833657              | -1.03            |
| EID3         | EP300-interacting inhibitor of differentiat | 0 33243 34358          | 0.156350              | -1.49            | 0.484550              | -1.42            | 0.325546              | -1.37            |
| TTC21A       | tetratricopeptide repeat protein 21A isofo  | 2 94028425 94059641    | 0.156731              | 1.36             | 0.738507              | -1.17            | 0.006078              | -1.77            |
| FOPNL        | lisH domain-containing protein FOPNL is     | 20 15913290 15935841   | 0.156754              | -1.19            | 0.495563              | 1.17             | 0.533079              | 1.10             |
| CRB1         | protein crumbs homolog 1 isoform X1         | 1 55543326 55753374    | 0.156767              | 2.17             | 0.965578              | -1.07            | 0.978704              | -1.02            |
| LOC102118920 |                                             | 2 90012154 90022294    | 0.156767              | -1.18            | 0.092917              | 1.35             | 0.551718              | 1.09             |
| LOC102133674 | NKG2-C type II integral membrane prote      | 11 5 658               | 0.156782              | 1.63             | 0.077201              | -3.96            | 0.000292              | 3.60             |
| LOC107126507 | supervillin-like                            | 9 31328387 31345530    | 0.156844              | 1.22             | 0.973196              | 1.01             | 0.730623              | -1.06            |
| LOC107127234 |                                             | 14 3079672 3082683     | 0.156888              | 3.10             | 0.144398              | 7.95             | 0.411417              | 2.34             |
| DISP3        | patched domain-containing protein 2         | 1 216592803 216630402  | 0.156888              | 2.65             | 0.797388              | 1.47             | 0.991360              | 1.01             |
| BHLHA15      | class A basic helix-loop-helix protein 15   | 3 42414152 42414727    | 0.156888              | 1.55             | 0.942662              | -1.06            | 0.316854              | 1.41             |
| NKD1         | protein naked cuticle homolog 1             | 20 38361673 38445788   | 0.156888              | 1.47             | 0.226211              | 1.71             | 0.215363              | 1.47             |
| KBTBD8       | kelch repeat and BTB domain-containing      | 2 122600063 122610021  | 0.156888              | -1.37            | 0.308406              | 1.46             | 0.408762              | 1.24             |
| SEMA6B       | semaphorin-6B                               | 19 4616055 4625242     | 0.156888              | -1.50            | 0.151498              | 1.91             | 0.839147              | -1.08            |
| NEUROD6      | neurogenic differentiation factor 6         | 3 89329561 89330574    | 0.156986              | 5.02             | 0.240963              | -15.58           | 0.070804              | -14.82           |
| PNRC1        | uncharacterized protein LOC101867275        | 4 84910375 84913654    | 0.156986              | -1.25            | 0.900115              | 1.05             | 0.736636              | 1.07             |
| BLOC1S6      | uncharacterized protein LOC101866235        | 7 22526204 22542077    | 0.156986              | -1.29            | 0.727784              | 1.14             | 0.272170              | 1.25             |
| HTR5A        | 5-hydroxytryptamine receptor 5A             | 3 187996056 188007959  | 0.156986              | -1.43            | 0.480146              | 1.36             | 0.006078              | 1.99             |
| LOC107127182 |                                             | 13 106117990 106124772 | 0.157011              | -2.64            | 0.118421              | 4.80             | 0.168584              | -2.89            |
| LOC102120636 |                                             | 14 88814689 88828829   | 0.157504              | 3.48             | 0.265374              | 6.15             | 0.841031              | -1.27            |
| PM20D2       | peptidase M20 domain-containing protein     | 4 84837749 84858046    | 0.157504              | -1.22            | 0.862392              | -1.06            | 0.469896              | -1.13            |
| AK4          | adenylate kinase 4, mitochondrial           | 1 162138971 16222006   | 0.157521              | -1.88            | 0.861920              | 1.21             | 0.673564              | 1.26             |
| ACSL5        |                                             | 9 111512760 111590508  | 0.157858              | -1.42            | 0.732539              | -1.20            | 0.705258              | 1.13             |
| SPDYA        | speedy protein A isoform X3                 | 13 81955809 81989348   | 0.157932              | -2.12            | 0.830639              | 1.30             | 0.026672              | -3.16            |
| LOC101925576 |                                             | 4 36299107 36303613    | 0.158011              | 5.64             | 1.000000              | 2.63             | 1.000000              | 3.63             |
| ARHGAP28     | rho GTPase-activating protein 28 isoform    | 18 67917248 68111679   | 0.158013              | 1.46             | 0.774694              | 1.18             | 0.992051              | -1.00            |
| UBE2E2       | ubiquitin-conjugating enzyme E2 E2          | 2 23903887 24287109    | 0.158118              | -1.27            | 0.299648              | 1.34             | 0.990618              | 1.00             |
| RRAS2        | ras-related protein R-Ras2 isoform X1       | 14 53388193 53468085   | 0.158118              | -1.29            | 0.245392              | 1.41             | 0.787438              | 1.07             |
| NRIP1        | nuclear receptor-interacting protein 1      | 3 32319128 32322595    | 0.158118              | -1.37            | 0.580749              | 1.26             | 0.806828              | 1.08             |
| GRIN2D       | glutamate receptor ionotropic, NMDA 2D      | 19 49214594 49234291   | 0.158187              | -2.01            | 0.731508              | -1.38            | 0.638174              | 1.31             |
| CLEC4D       | C-type lectin domain family 4 member D      | 11 8750479 8757609     | 0.158236              | -1.78            | 0.904210              | 1.14             | 0.051735              | 2.40             |
| KIF25        |                                             | 4 2689239 2760057      | 0.158236              | -2.16            | 0.765740              | -1.49            | 0.736838              | -1.29            |
| LOC102126451 | tumor necrosis factor receptor superfamily  | 16 17249915 17280695   | 0.158382              | 1.90             | 0.595577              | -1.56            | 0.563394              | 1.35             |
| IQCA1        | IQ and AAA domain-containing protein 1      | 12 126168200 126335218 | 0.158451              | 1.54             | 0.171679              | 1.95             | 0.397439              | -1.35            |
| GBA          | glucosylceramidase isoform X1               | 1 96581318 96587770    | 0.158522              | -1.31            | 0.492464              | -1.27            | 0.738113              | -1.09            |
| LOC102132176 | Ig heavy chain V-I region 5-like            | 13 18266539 18268269   | 0.158800              | 2.00             | 0.801126              | 1.31             | 0.009369              | 2.91             |
| LOC102147238 |                                             | 3 1651635 1669247      | 0.158800              | 1.35             | 0.427648              | -1.36            | 0.644091              | 1.13             |
| IFNGR2       | interferon gamma receptor 2                 | 3 13322146 13362490    | 0.158800              | -1.20            | 0.341577              | -1.24            | 0.959320              | 1.01             |
| GCFC2        | GC-rich sequence DNA-binding factor 2       | 13 34115118 34163690   | 0.158800              | -1.25            | 0.858388              | -1.07            | 0.663013              | 1.09             |
| LOC107129261 |                                             | 3 120177684 120182126  | 0.158800              | -3.51            | 1.000000              | -2.49            | 0.853210              | 1.28             |
| EBPL         | emopamil-binding protein-like               | 17 28863305 28904412   | 0.158821              | -1.24            | 0.115476              | -1.44            | 0.085517              | -1.32            |
| LOC102145999 | uncharacterized protein C10orf12 isoform    | 9 95711165 95783117    | 0.159219              | -1.33            | 0.373742              | 1.36             | 0.638605              | 1.12             |
| BLZF1        | golgin-45 isoform X1                        | 1 27322211 27339848    | 0.159219              | -1.34            | 0.158686              | 1.58             | 0.605023              | 1.14             |
| GSTM2        | glutathione S-transferase Mu 2              | 1 117074054 117079786  | 0.159249              | 1.54             | 0.877513              | -1.12            | 0.468043              | -1.30            |
| UNK          | RING finger protein unknempt homolog is     | 16 73102692 73147102   | 0.159345              | 1.15             | 0.735943              | -1.07            | 0.723014              | -1.05            |
| CIQL3        | complement C1q-like protein 3               | 9 17033352 17039910    | 0.159345              | -2.01            | 0.343862              | 2.31             | 0.836387              | -1.14            |
| ZBTB1        | zinc finger and BTB domain-containing p     | 7 128864931 128875332  | 0.159482              | -1.20            | 0.852904              | 1.06             | 0.829031              | 1.04             |
| CD37         | leukocyte antigen CD37 isoform X1           | 19 50137689 50142544   | 0.159529              | 1.23             | 0.760039              | -1.10            | 0.742717              | -1.06            |
| LOC107127802 |                                             | 16 33902032 33904798   | 0.159567              | 1.64             | 0.726964              | 1.31             | 0.796250              | -1.13            |
| RBM45        | RNA-binding protein 45 isoform X1           | 12 67090885 67104818   | 0.159567              | -1.16            | 0.004103              | -1.50            | 0.119493              | 1.20             |
| VDAC1        | uncharacterized protein LOC101864983        | 6 132974948 132996547  | 0.159567              | -1.19            | 0.787740              | -1.08            | 0.913663              | 1.02             |
| PHF7         | PHD finger protein 7 isoform X1             | 2 107690256 107701723  | 0.159646              | -1.27            | 0.996330              | 1.00             | 0.363937              | -1.20            |
| LOC102144707 | calcium-binding mitochondrial carrier pro   | 1 118698919 118752038  | 0.159710              | -1.42            | 0.536457              | 1.33             | 0.441385              | 1.25             |
| KIAA1524     | protein CIP2A isoform X1                    | 2 163614644 163653079  | 0.159710              | -1.52            | 0.855131              | -1.14            | 0.498446              | 1.27             |
| G2E3         | G2/M phase-specific E3 ubiquitin-protein    | 7 94459110 94495476    | 0.159710              | -1.55            | 0.271093              | 1.76             | 0.422000              | 1.34             |
| SNED1        | sushi, nidogen and EGF-like domain-cont     | 12 130942646 131029165 | 0.159754              | 1.58             | 0.655543              | -1.33            | 0.138322              | -1.69            |
| LOC102142175 |                                             | 9 120255492 120289148  | 0.159774              | 1.94             | 0.306259              | -2.27            | 0.271206              | -1.83            |



| Gene symbol  | Gene name                                                  | chr_start_end          | Day3 adjusted P-value | Day3 fold change | Day5 adjusted P-value | Day5 fold change | Day7 adjusted P-value | Day7 fold change |
|--------------|------------------------------------------------------------|------------------------|-----------------------|------------------|-----------------------|------------------|-----------------------|------------------|
| C9H10orf95   | LOW QUALITY PROTEIN: uncharacterized                       | 9 101455104 101456057  | 0.159774              | 1.78             | 0.695370              | -1.44            | 0.492448              | -1.42            |
| CSTF3        | cleavage stimulation factor subunit 3                      | 14 34282440 34361559   | 0.159774              | -1.18            | 0.516909              | 1.15             | 0.946097              | 1.01             |
| GNPDA2       | glucosamine-6-phosphate isomerase 2 isoform                | 5 44579934 44599189    | 0.159774              | -1.36            | 0.388442              | 1.38             | 0.236241              | 1.34             |
| HES1         | transcription factor HES-1                                 | 2 3406151 3408011      | 0.159807              | 1.29             | 0.390165              | 1.31             | 0.628419              | 1.11             |
| DGKA         | diacylglycerol kinase alpha isoform X1                     | 11 54839459 54857035   | 0.159807              | 1.25             | 0.160249              | -1.42            | 0.983311              | -1.00            |
| MRPS30       | 28S ribosomal protein S30, mitochondrial                   | 6 45576881 45583113    | 0.159807              | -1.20            | 0.714613              | 1.10             | 0.341441              | 1.15             |
| EXOG         | nuclease EXOG, mitochondrial isoform X1                    | 2 93399838 93426429    | 0.159807              | -1.21            | 0.741684              | 1.10             | 0.994367              | 1.00             |
| PRKCI        | protein kinase C iota type                                 | 2 74442108 74524976    | 0.159807              | -1.25            | 0.860222              | 1.07             | 0.943942              | -1.02            |
| LOC102121606 | galactoside 2-alpha-L-fucosyltransferase 2                 | 19 49533725 49534846   | 0.159838              | 4.54             | 1.000000              | 1.83             | 0.732063              | 1.38             |
| LOC107127804 |                                                            | 16 33930962 33943400   | 0.159838              | 2.42             | 0.796878              | 1.37             | 0.616218              | -1.43            |
| ARHGAP23     | rho GTPase-activating protein 23                           | 16 49903197 49989482   | 0.159838              | 1.32             | 0.086271              | 1.67             | 0.802958              | -1.07            |
| LOC102132042 | multivesicular body subunit 12A-like isoform               | 0 766 1755             | 0.159838              | 1.19             | 0.088755              | -1.37            | 0.434960              | 1.12             |
| BRD7         | bromodomain-containing protein 7 isoform                   | 20 38126355 38176710   | 0.159838              | 1.11             | 0.950491              | -1.01            | 0.670846              | -1.04            |
| ANKRD10      | ankyrin repeat domain-containing protein 10                | 17 93267620 93302810   | 0.159838              | -1.31            | 0.812352              | 1.11             | 0.718562              | -1.09            |
| RAD54L       | DNA repair and recombination protein RAD54L                | 1 181219709 181251014  | 0.159838              | -1.53            | 0.297373              | -1.69            | 0.892061              | 1.06             |
| LOC102125719 |                                                            | 11 66516625 66606899   | 0.159838              | -2.97            | 0.701667              | 1.88             | 0.773059              | -1.32            |
| HNRNPA3      | heterogeneous nuclear ribonucleoprotein A3                 | 12 66165178 66171341   | 0.159848              | -1.20            | 0.954060              | 1.02             | 0.514270              | 1.11             |
| IQCG         | IQ domain-containing protein G isoform 2                   | 0 82148 138175         | 0.160042              | 1.27             | 0.564636              | -1.21            | 0.863309              | 1.04             |
| GTF2E2       | transcription initiation factor IIE subunit beta           | 8 31150873 31232064    | 0.160042              | -1.15            | 0.141819              | -1.26            | 0.378202              | -1.11            |
| LOC102140483 | zinc finger protein 83 isoform X2                          | 19 53286367 53317641   | 0.160042              | -1.15            | 0.973924              | -1.01            | 0.148557              | 1.18             |
| CHD6         | chromodomain-helicase-DNA-binding protein 6                | 10 73045030 73192282   | 0.160119              | 1.19             | 0.923603              | 1.03             | 0.721109              | 1.06             |
| CYS1         | cystin-1                                                   | 13 100888466 100912748 | 0.160159              | 1.78             | 0.329247              | 1.97             | 0.622939              | -1.28            |
| TSR2         | pre-rRNA-processing protein TSR2 homolog                   | X 53547989 53552130    | 0.160248              | 1.13             | 0.613163              | -1.09            | 0.316988              | -1.11            |
| LOC102135544 |                                                            | 4 68853784 68916498    | 0.160248              | -2.89            | 0.729637              | -1.88            | 0.573876              | -1.75            |
| EEFSEC       | selenocysteine-specific elongation factor isoform          | 11 88791797 89045666   | 0.160360              | 1.13             | 0.651172              | -1.09            | 0.681090              | -1.05            |
| LOC107127466 |                                                            | 14 126156330 126169370 | 0.160362              | 2.25             | 0.907411              | -1.19            | 0.350402              | -1.87            |
| DNAIL1       | dynein intermediate chain 1, axonemal isoform              | 15 44607355 44673148   | 0.160371              | 5.01             | 0.935829              | -1.29            | 0.424357              | -2.97            |
| LENG9        | LOW QUALITY PROTEIN: leukocyte recombination               | 19 55378796 55380220   | 0.160588              | 1.24             | 0.935376              | -1.03            | 0.308068              | 1.20             |
| STX1B        | syntaxin-1B                                                | 20 29649985 29668988   | 0.160660              | 1.94             | 0.764208              | 1.38             | 0.464788              | -1.52            |
| HHEX         | hematopoietically-expressed homeobox protein               | 9 91188902 91193658    | 0.160769              | -1.14            | 0.221333              | 1.21             | 0.136814              | 1.17             |
| SLC16A10     | monocarboxylate transporter 10                             | 4 14997015 15134824    | 0.160769              | -3.03            | 0.924840              | 1.21             | 0.372789              | -2.26            |
| LOC102116067 | protein SCO1 homolog, mitochondrial                        | 16 10859045 10873164   | 0.160892              | -1.10            | 0.359450              | -1.12            | 0.079288              | 1.14             |
| NHLRC3       | NHL repeat-containing protein 3                            | 17 18333982 18343258   | 0.160922              | -1.31            | 0.736234              | 1.15             | 0.277797              | 1.27             |
| DTYMK        | thymidylate kinase isoform X4                              | 12 131656905 131667967 | 0.160922              | -1.37            | 0.299648              | -1.48            | 0.904319              | -1.04            |
| LOC102129453 | cancer/testis antigen family 45 member A                   | X 132700849 132705033  | 0.160922              | -2.76            | 1.000000              | 1.07             | 0.378526              | -2.23            |
| LOC102132668 |                                                            | 5 137570354 138121172  | 0.160974              | 2.22             | 0.967343              | 1.07             | 0.985102              | 1.02             |
| RTKN         | rhotekin isoform X1                                        | 13 35470516 35485974   | 0.161021              | -1.38            | 0.746508              | -1.17            | 0.387353              | -1.26            |
| ZMIZ1        | zinc finger MIZ domain-containing protein 1                | 9 56313409 56489409    | 0.161130              | 1.15             | 0.893715              | 1.03             | 0.928154              | -1.01            |
| IKZF2        | zinc finger protein Helios isoform X4                      | 12 102542281 102689778 | 0.161130              | -1.37            | 0.889183              | 1.08             | 0.297705              | 1.30             |
| KRT8         | keratin, type II cytoskeletal 8                            | 11 51733869 51741366   | 0.161232              | -1.68            | 0.991729              | 1.01             | 0.427354              | -1.41            |
| ZSCAN10      | zinc finger and SCAN domain-containing protein 10          | 20 3354021 3357875     | 0.161256              | 2.62             | 0.979788              | 1.05             | 0.061554              | -4.02            |
| HEPHE1       | hephaestin-like protein 1 isoform X2                       | 14 89906769 89986403   | 0.161326              | 3.30             | 0.601688              | 2.00             | 0.345608              | 2.11             |
| LOC102145847 | lipoygenase homology domain-containing protein             | 8 55663371 55808197    | 0.161326              | 2.95             | 0.795948              | 1.61             | 0.814672              | -1.28            |
| PDE4B        | cAMP-specific 3',5'-cyclic phosphodiesterase 4B            | 1 160988172 161436461  | 0.161326              | 1.31             | 0.157309              | 1.53             | 0.267232              | 1.27             |
| DCLRE1A      | DNA cross-link repair 1A protein                           | 9 113010754 113028393  | 0.161326              | -1.17            | 0.943943              | -1.02            | 0.322448              | 1.14             |
| PPTC7        | protein phosphatase PTC7 homolog                           | 11 114154001 114198951 | 0.161326              | -1.25            | 0.448294              | 1.24             | 0.852254              | 1.04             |
| PIRT         | phosphoinositide-interacting protein                       | 16 11002091 11002504   | 0.161398              | 3.42             | 0.297373              | 5.85             | 0.769091              | -1.40            |
| LOC102138090 | ribosomal RNA-processing protein 7 homolog                 | 10 8465282 8472233     | 0.161583              | -1.18            | 0.598634              | -1.13            | 0.965144              | -1.01            |
| RNF225       | LOW QUALITY PROTEIN: RING finger protein                   | 19 58997551 58999212   | 0.161674              | 6.50             | 1.000000              | -1.08            | 1.000000              | 2.26             |
| ICAM4        | intercellular adhesion molecule 4                          | 19 10563775 10564866   | 0.161786              | 1.63             | 0.205450              | 2.03             | 0.050002              | -2.03            |
| GFM2         | ribosome-releasing factor 2, mitochondrial                 | 6 72934840 72979469    | 0.161786              | -1.14            | 0.874543              | 1.04             | 0.454421              | -1.09            |
| ELOVL1       | elongation of very long chain fatty acids protein 1        | 1 184254284 184255972  | 0.161853              | -1.17            | 0.557839              | -1.13            | 0.117250              | -1.21            |
| RAB21        | ras-related protein Rab-21                                 | 11 70834385 70866185   | 0.161853              | -1.29            | 0.242505              | 1.41             | 0.476332              | 1.16             |
| SETD4        | SET domain-containing protein 4 isoform                    | 3 10719419 10743069    | 0.162027              | -1.21            | 0.286869              | -1.27            | 0.397547              | -1.14            |
| GDE1         | glycerophosphodiester phosphodiesterase 1                  | 20 18869112 18890648   | 0.162303              | -1.14            | 0.338577              | -1.17            | 0.851904              | -1.02            |
| METTL21A     | protein N-lysine methyltransferase METTL21A                | 12 97185739 97230802   | 0.162303              | -1.34            | 0.917974              | 1.06             | 0.544684              | 1.16             |
| HOXA9        | homeobox protein Hox-A9                                    | 3 93562798 93564664    | 0.162303              | -1.70            | 0.447947              | -1.66            | 0.925871              | 1.06             |
| BTN3A1       | LOW QUALITY PROTEIN: butyrophilin 3 class 1 member A1      | 4 144131551 144140721  | 0.162386              | 1.27             | 1.000000              | -1.00            | 0.493550              | 1.15             |
| SPP1         | osteopontin                                                | 5 87082940 87088968    | 0.162715              | 3.16             | 0.169282              | -5.97            | 0.462395              | 2.04             |
| NTRK1        | high affinity nerve growth factor receptor tyrosine kinase | 1 94819451 94840644    | 0.163071              | 1.72             | 0.152351              | -2.37            | 0.511042              | 1.33             |
| ALDH1L1      | cytosolic 10-formyltetrahydrofolate dehydrogenase          | 2 146166932 146224379  | 0.163071              | 1.59             | 0.141144              | -2.12            | 0.180751              | -1.63            |
| KIAA1328     | protein hinderin isoform X2                                | 18 44815572 45200676   | 0.163071              | 1.20             | 0.451097              | 1.19             | 0.849649              | -1.03            |
| GLTP         | glycolipid transfer protein isoform X3                     | 11 33580 63725         | 0.163071              | -1.18            | 0.966516              | -1.02            | 0.767818              | -1.05            |
| LOC102119106 |                                                            | 5 109219157 109276489  | 0.163071              | -3.48            | 1.000000              | 2.36             | 0.761511              | -1.36            |
| ZNF644       | zinc finger protein 644 isoform X1                         | 1 136296313 136361998  | 0.163377              | -1.29            | 0.414334              | 1.30             | 0.367045              | 1.21             |
| GGACT        | gamma-glutamylaminocyclotransferase isoform                | 17 83136059 83181728   | 0.163417              | -1.18            | 0.458307              | 1.17             | 0.023581              | -1.31            |
| GPRC5D       | G-protein coupled receptor family C group 5 member D       | 11 13540888 13551412   | 0.163419              | -1.96            | 0.901660              | 1.17             | 0.566852              | -1.40            |
| CUL5         | LOW QUALITY PROTEIN: cullin-5                              | 14 104047536 104153768 | 0.163535              | -1.34            | 0.329312              | 1.41             | 0.446146              | 1.21             |
| LOC102125109 | aspartate-rich protein 1-like                              | 10 13560 23153         | 0.163631              | 3.47             | 1.000000              | -1.32            | 0.979515              | -1.03            |
| LOC102139757 |                                                            | X 71095570 71126114    | 0.163737              | -1.28            | 0.640338              | 1.17             | 0.828839              | -1.05            |
| VANGL2       | vang-like protein 2                                        | 1 91240255 91249921    | 0.163781              | 1.36             | 0.965551              | -1.03            | 0.783638              | 1.08             |
| DPH6         | diphthine--ammonia ligase                                  | 7 12152703 12333138    | 0.164163              | -1.16            | 0.950616              | 1.02             | 0.826952              | 1.03             |
| MFAP3L       | microfibrillar-associated protein 3-like isoform           | 5 169196727 169232898  | 0.164163              | -1.39            | 0.968970              | -1.03            | 0.993285              | -1.00            |
| TMEM202      | transmembrane protein 202 isoform X2                       | 7 50230831 50241997    | 0.164441              | 1.83             | 0.651878              | 1.43             | 0.705058              | -1.20            |
| E2F6         | E2F transcription factor 6                                 | 13 99518910 99537158   | 0.164537              | -1.22            | 0.386040              | 1.25             | 0.605589              | -1.10            |
| PAK6         | serine/threonine-protein kinase PAK 6 isoform              | 7 17068514 17080769    | 0.164752              | 1.87             | 0.352499              | -2.04            | 0.170171              | -1.99            |
| LOC107127362 |                                                            | 1 168825735 168829163  | 0.164771              | 1.31             | 0.359450              | 1.35             | 0.387118              | -1.21            |
| GUCY1A2      | guanylate cyclase soluble subunit alpha-2                  | 14 102727406 103055285 | 0.164806              | -1.41            | 0.613389              | 1.27             | 0.110915              | 1.52             |
| PSMA7        | proteasome subunit alpha type-7                            | 10 94106248 94113037   | 0.164951              | -1.18            | 0.533051              | -1.15            | 0.945867              | 1.01             |
| RHOQ         | rho-related GTP-binding protein RhoQ isoform               | 13 63801876 63839860   | 0.165154              | -1.42            | 0.897619              | 1.08             | 0.990548              | 1.00             |
| PPP1R14B     | protein phosphatase 1 regulatory subunit 14B               | 14 10306587 10308474   | 0.165255              | -1.48            | 0.811935              | -1.16            | 0.799839              | 1.10             |
| GP2          | glycerol-3-phosphate dehydrogenase, mitochondrial          | 12 45245740 45352603   | 0.165726              | -1.31            | 0.835443              | 1.10             | 0.566174              | 1.14             |
| LOC102134495 |                                                            | 1 38476054 38507358    | 0.165921              | -1.55            | 0.271883              | -1.79            | 0.034076              | -1.98            |
| LOC107130973 |                                                            | 10 6829917 6860829     | 0.165921              | -3.55            | 1.000000              | -2.49            | 0.191881              | -3.01            |
| LOC102144615 |                                                            | 17 56687706 56718388   | 0.166007              | 2.37             | 0.207297              | -4.41            | 0.814839              | -1.23            |
| RPL5         | 60S ribosomal protein L5 isoform X1                        | 1 134127603 134137914  | 0.166183              | 1.13             | 0.518077              | -1.11            | 0.749562              | -1.04            |
| CKS2         | cyclin-dependent kinases regulatory subunit 2              | 15 99986357 99991447   | 0.166183              | -1.57            | 0.560019              | -1.42            | 0.961943              | 1.02             |

| Gene symbol  | Gene name                                                 | chr_start_end          | Day3 adjusted P-value | Day3 fold change | Day5 adjusted P-value | Day5 fold change | Day7 adjusted P-value | Day7 fold change |
|--------------|-----------------------------------------------------------|------------------------|-----------------------|------------------|-----------------------|------------------|-----------------------|------------------|
| ZNF608       | zinc finger protein 608 isoform X5                        | 6 123538359 123653615  | 0.166253              | 1.29             | 0.502844              | -1.25            | 0.761252              | -1.08            |
| KLHL38       | kelch-like protein 38                                     | 8 124988389 124996315  | 0.166260              | 2.30             | 0.950140              | 1.12             | 0.485801              | 1.89             |
| BEND5        | BEN domain-containing protein 5 isoform                   | 1 178744636 178793455  | 0.166260              | 1.59             | 0.846842              | -1.16            | 0.777400              | 1.13             |
| ARID1B       | AT-rich interactive domain-containing protein             | 4 63125163 63574044    | 0.166260              | 1.08             | 0.818934              | 1.03             | 0.182868              | 1.09             |
| LOC101730657 |                                                           | 8 96953189 96965517    | 0.166355              | 2.61             | 0.309562              | 4.69             | 0.713879              | 1.31             |
| HAUS3        | HAUS augmin-like complex subunit 3                        | 5 2276699 2286284      | 0.166355              | -1.36            | 0.948177              | -1.04            | 0.317837              | 1.29             |
| BEND6        | BEN domain-containing protein 6                           | 4 113642357 113680389  | 0.166442              | 1.48             | 0.205170              | 1.76             | 0.066045              | -1.72            |
| MAPK10       | mitogen-activated protein kinase 10 isoform               | 5 85093361 85398034    | 0.166465              | 1.80             | 0.166985              | -2.58            | 0.057351              | -2.33            |
| DPYSL5       | dihydropyrimidinase-related protein 5                     | 13 83937701 83989763   | 0.166471              | 4.09             | 1.000000              | -3.16            | 0.920875              | -1.13            |
| STAB1        | stabilin-1 isoform X1                                     | 2 107779844 107809791  | 0.166471              | -1.67            | 0.829475              | -1.20            | 0.382741              | 1.45             |
| NUP54        | nucleoporin p54 isoform X2                                | 5 58334375 58366765    | 0.166568              | -1.17            | 0.285818              | 1.23             | 0.177990              | 1.19             |
| ETS1         | protein C-ets-1 isoform X4                                | 14 124251145 124363792 | 0.166612              | 1.38             | 0.929337              | 1.06             | 0.470712              | 1.22             |
| RSPH4A       | radial spoke head protein 4 homolog A isoform             | 4 20641474 20657494    | 0.166653              | 5.06             | 0.823449              | -1.85            | 0.946055              | -1.13            |
| STXBPL5      | syntaxin-binding protein 5-like isoform X1                | 2 150788968 151285361  | 0.167102              | 3.24             | 1.000000              | -1.07            | 0.326564              | -2.67            |
| PACRG        | PACRG-like protein                                        | 5 19872116 19886983    | 0.167102              | -1.16            | 0.736979              | 1.08             | 0.582030              | 1.07             |
| RPRD1A       | regulation of nuclear pre-mRNA domain-rotatin isoform X1  | 18 45933259 46003616   | 0.167102              | -1.20            | 0.476013              | 1.19             | 0.682286              | 1.07             |
| RTTN         | rotatin isoform X1                                        | 18 9906277 10100946    | 0.167102              | -1.24            | 0.920707              | -1.04            | 0.531277              | 1.13             |
| B3GALNT1     | UDP-GalNAc:beta-1,3-N-acetylgalactosaminyltransferase 1   | 2 63480219 63481214    | 0.167102              | -1.30            | 0.456710              | 1.28             | 0.127117              | 1.36             |
| C10H20orf196 | uncharacterized protein C20orf196 homolog                 | 10 56633906 56748093   | 0.167215              | 1.35             | 0.691619              | 1.19             | 0.630629              | -1.14            |
| LOC102127958 | peflin                                                    | 16 36752089 36752940   | 0.167250              | 2.13             | 0.873036              | -1.23            | 0.946262              | 1.06             |
| ACLY         | ATP-citrate synthase isoform X2                           | 16 53564115 53618807   | 0.167250              | 1.15             | 0.941356              | 1.02             | 0.250377              | 1.14             |
| OPLAH        | 5-oxoprolinase                                            | 8 145687321 145701591  | 0.167360              | 1.48             | 0.954800              | 1.05             | 0.410700              | -1.31            |
| LOC102136881 | uncharacterized protein C1orf194 homolog                  | 0 365 4606             | 0.167400              | 3.78             | 0.834216              | 1.86             | 0.722259              | -1.59            |
| RMDN2        | regulator of microtubule dynamics protein 2               | 13 72666335 72728386   | 0.167400              | -1.47            | 0.321340              | -1.59            | 0.125746              | -1.58            |
| ACSL4        | long-chain-fatty-acid--CoA ligase 4 isoform               | X 106764374 106795589  | 0.167665              | -1.45            | 0.097252              | 1.96             | 0.368655              | 1.32             |
| STK36        | serine/threonine-protein kinase 36 isoform                | 12 108351289 108380455 | 0.167787              | 1.28             | 0.271539              | -1.37            | 0.282476              | -1.24            |
| ICAM2        | intercellular adhesion molecule 2                         | 16 61331837 61335822   | 0.167787              | 1.25             | 0.113334              | 1.48             | 0.367739              | 1.19             |
| PANX2        | pannexin-2 isoform X1                                     | 10 676667 684853       | 0.167787              | -1.68            | 0.956287              | -1.06            | 0.430564              | -1.43            |
| LOC102129727 | zinc finger and BTB domain-containing protein             | 0 638 7644             | 0.167823              | 1.46             | 0.903173              | -1.09            | 0.889881              | -1.05            |
| CELSR2       | cadherin EGF LAG seven-pass G-type receptor 2             | 1 117482539 117505265  | 0.167823              | 1.32             | 0.858959              | -1.09            | 0.887906              | 1.04             |
| GSPT1        | eukaryotic peptide chain release factor G1                | 20 12148498 12195824   | 0.167823              | -1.27            | 0.448753              | 1.26             | 0.783681              | -1.06            |
| CCDC18       | coiled-coil domain-containing protein 18                  | 1 133665630 133774734  | 0.167823              | -1.44            | 0.470216              | -1.40            | 0.344161              | 1.33             |
| TRAF2        | TNF receptor-associated factor 2 isoform                  | 15 1373494 1401580     | 0.167933              | 1.17             | 0.095845              | -1.33            | 0.697158              | -1.06            |
| HAPLN1       | hyaluronan and proteoglycan link protein 1                | 6 81932661 81964294    | 0.167933              | -2.05            | 0.516953              | -1.88            | 0.001112              | 4.77             |
| CCDC112      | coiled-coil domain-containing protein 112                 | 6 114059984 114086068  | 0.168074              | -1.22            | 0.679770              | 1.13             | 0.978546              | 1.01             |
| GRIK1        | glutamate receptor ionotropic, kainate 1 isoform          | 3 16991489 17397235    | 0.168095              | 2.40             | 0.856639              | -1.31            | 0.129603              | 2.79             |
| KIF4B        | chromosome-associated kinesin KIF4B                       | 6 154373028 154376732  | 0.168206              | 2.16             | 0.774796              | -1.37            | 0.260683              | 2.19             |
| UVSSA        | UV-stimulated scaffold protein A                          | 5 1349901 1388834      | 0.168206              | 1.40             | 0.613838              | -1.28            | 0.034043              | 1.70             |
| AP1S2        | AP-1 complex subunit sigma-2 isoform X1                   | X 13653451 13678426    | 0.168206              | -1.55            | 0.451097              | 1.52             | 0.186013              | 1.59             |
| LOC102123873 |                                                           | 17 90740605 90768723   | 0.168252              | -1.82            | 0.281917              | 2.15             | 0.665987              | -1.26            |
| RAMP3        | uncharacterized protein LOC101926441                      | 3 75319838 75340460    | 0.168296              | 1.77             | 0.581727              | 1.54             | 0.559266              | -1.35            |
| MRPL16       | 39S ribosomal protein L16, mitochondria                   | 14 14288464 14293068   | 0.168322              | -1.12            | 0.529876              | -1.10            | 0.556510              | 1.06             |
| HHIPL1       | HHIP-like protein 1                                       | 7 164828999 164865695  | 0.168322              | -1.42            | 0.040329              | -2.13            | 0.857296              | 1.06             |
| RGS9         | regulator of G-protein signaling 9                        | 16 62346389 62442969   | 0.168365              | 1.22             | 0.321766              | 1.28             | 0.678970              | -1.08            |
| ERICH5       | glutamate-rich protein 5 isoform X1                       | 8 99215733 99243557    | 0.168494              | 4.15             | 0.593152              | 3.43             | 0.543147              | -2.23            |
| CYP2A26      | cytochrome P450 2A13-like precursor                       | 19 41373841 41380365   | 0.168494              | 2.97             | 0.245817              | -9.56            | 0.294549              | -3.17            |
| VPS39        | vam6/Vps39-like protein isoform X2                        | 7 19100466 19145284    | 0.168494              | 1.15             | 0.901038              | -1.03            | 0.670759              | -1.05            |
| ARAF         | serine/threonine-protein kinase A-Raf                     | X 46022406 46031123    | 0.168494              | 1.14             | 0.233423              | -1.20            | 0.070717              | -1.20            |
| CD2BP2       | uncharacterized protein LOC101865010                      | 20 28943244 28946368   | 0.168494              | 1.10             | 0.978273              | 1.01             | 0.579008              | -1.05            |
| LOC102119817 |                                                           | 19 35452453 35454420   | 0.168494              | -1.75            | 0.635207              | 1.60             | 0.907667              | -1.08            |
| C20H16orf58  | RUS1 family protein C16orf58 homolog                      | 20 30166096 30183938   | 0.168540              | 1.15             | 0.001925              | -1.49            | 0.000002              | -1.49            |
| GRK5         | G protein-coupled receptor kinase 5 isoform               | 9 118438933 118697855  | 0.168544              | 1.49             | 0.235647              | 1.75             | 0.737765              | -1.13            |
| RPL39        | 60S ribosomal protein L39 isoform X1                      | X 116513847 116518943  | 0.168544              | 1.22             | 0.453986              | -1.21            | 0.131268              | -1.26            |
| SCFD1        | sec1 family domain-containing protein 1 isoform           | 7 94501350 94604166    | 0.168544              | -1.22            | 0.908262              | 1.04             | 0.369173              | 1.16             |
| SLFN13       | schlafen family member 13 isoform X2                      | 16 31810634 31815712   | 0.168549              | -1.42            | 0.732975              | -1.20            | 0.655327              | 1.15             |
| FAN1         | fanconi-associated nuclease 1 isoform X1                  | 7 7621239 7654970      | 0.168587              | 1.57             | 0.950025              | 1.06             | 0.548174              | -1.27            |
| LOC102119291 |                                                           | 16 21152841 21161938   | 0.168653              | 3.09             | 0.003161              | -67.54           | 0.804185              | -1.30            |
| CEP70        | centrosomal protein of 70 kDa isoform X1                  | 2 40636196 40735144    | 0.168653              | -1.19            | 0.140985              | -1.32            | 0.158093              | -1.21            |
| CCDC91       | coiled-coil domain-containing protein 91                  | 11 28905596 29281292   | 0.168653              | -1.25            | 0.199469              | 1.40             | 0.931369              | 1.02             |
| CAGE1        | cancer-associated gene 1 protein homolog                  | 4 163575191 163638305  | 0.168726              | 2.18             | 0.893639              | -1.21            | 0.957306              | -1.05            |
| C20H16orf54  | transmembrane protein C16orf54 homolog                    | 20 28207974 28208648   | 0.168726              | 1.32             | 0.094740              | -1.66            | 0.884135              | -1.04            |
| ALKBH3       | alpha-ketoglutarate-dependent dioxygenase                 | 14 23667797 23712889   | 0.168726              | 1.16             | 0.235647              | -1.24            | 0.623647              | -1.07            |
| SFSWAP       | splicing factor, suppressor of white-apricot              | 11 136187527 136284191 | 0.168726              | 1.15             | 0.978827              | -1.01            | 0.546746              | -1.08            |
| ERGIC1       | endoplasmic reticulum-Golgi intermediate compartment 1    | 6 172475082 172596163  | 0.168808              | -1.17            | 0.040276              | 1.40             | 0.400573              | 1.12             |
| POC1B        | POC1 centriolar protein homolog B isoform                 | 11 92992858 93093459   | 0.168808              | -1.27            | 0.543360              | 1.22             | 0.366576              | 1.20             |
| LOC102145114 |                                                           | 8 118204801 118208227  | 0.168886              | 2.38             | 0.958827              | 1.10             | 0.358504              | -1.93            |
| WDR64        | WD repeat-containing protein 64 isoform                   | 1 7643386 7803522      | 0.168893              | 2.26             | 0.173905              | 3.33             | 0.734133              | -1.27            |
| CNPY2        | protein canopy homolog 2                                  | 11 55253622 55257668   | 0.168942              | -1.17            | 0.253859              | -1.24            | 0.339448              | -1.13            |
| C2H3orf67    | uncharacterized protein C3orf67 homolog                   | 2 114126508 114424409  | 0.168974              | 1.36             | 0.000362              | -3.41            | 0.013437              | -1.74            |
| SLC25A6      | solute carrier family 25 (mitochondrial carrier) member 6 | 0 1931 6560            | 0.168977              | 1.18             | 0.496440              | -1.16            | 0.874379              | -1.03            |
| UBE2E3       | uncharacterized protein LOC101864887                      | 12 69929860 70011064   | 0.168977              | -1.19            | 0.755493              | 1.09             | 0.618523              | 1.08             |
| LOC102140927 | LOW QUALITY PROTEIN: glucose-6-phosphate dehydrogenase 1  | 6 66086390 66088064    | 0.169062              | 1.68             | 0.081238              | -2.54            | 0.174815              | -1.68            |
| GUCY2D       | retinal guanylyl cyclase 1                                | 16 8112272 8126573     | 0.169062              | 1.63             | 0.696639              | 1.31             | 0.626278              | -1.22            |
| SV2A         | synaptic vesicle glycoprotein 2A                          | 1 102201759 102210284  | 0.169256              | 1.75             | 0.432836              | 1.73             | 0.426529              | -1.46            |
| ADK          | adenosine kinase isoform X4                               | 9 60888630 61450257    | 0.169350              | -1.25            | 0.944386              | 1.03             | 0.595931              | 1.11             |
| ADGRA2       | G-protein coupled receptor 124                            | 8 38586426 38633503    | 0.169362              | 1.27             | 0.649574              | 1.17             | 0.215425              | 1.27             |
| FAM206A      | protein Simiate                                           | 15 28758583 28763723   | 0.169362              | -1.18            | 0.979696              | -1.01            | 0.753137              | 1.05             |
| LOC102126289 |                                                           | 6 82709431 82755025    | 0.169362              | -1.78            | 0.126510              | 2.71             | 0.410712              | 1.52             |
| FAM183A      | protein FAM183A                                           | 1 184452220 184460604  | 0.169379              | 6.46             | 0.732938              | -2.78            | 0.643280              | -2.18            |
| ACKR3        | atypical chemokine receptor 3                             | 12 126408617 126409705 | 0.169379              | -1.31            | 0.135988              | 1.58             | 0.172672              | -1.35            |
| CPEB4        | cytoplasmic polyadenylation element-binding protein 4     | 6 173548182 173614811  | 0.169379              | -1.40            | 0.390027              | 1.44             | 0.514117              | 1.21             |
| DCDC2B       | LOW QUALITY PROTEIN: doublecortin 2                       | 1 195798559 195804178  | 0.169427              | 1.51             | 0.888754              | 1.11             | 0.226082              | -1.52            |
| LOC102134899 | tight junction protein ZO-3                               | 19 3726527 3737013     | 0.169432              | 1.48             | 0.468030              | -1.44            | 0.203733              | -1.50            |
| NADSYN1      | glutamine-dependent NAD(+) synthetase                     | 14 3363368 3410664     | 0.169432              | -1.18            | 0.174067              | -1.29            | 0.071058              | -1.26            |
| ZNF449       | zinc finger protein 449 isoform X2                        | X 132295812 132310711  | 0.169601              | -1.29            | 0.638796              | 1.18             | 0.298707              | 1.25             |
| PGM2L1       | glucose 1,6-bisphosphate synthase isoform                 | 14 69633203 69687579   | 0.169669              | 1.54             | 0.426942              | -1.52            | 0.482542              | 1.28             |
| ZNF624       | zinc finger protein 624                                   | 16 16195742 16232718   | 0.169695              | -1.23            | 0.494657              | 1.20             | 0.863133              | -1.04            |

| Gene symbol  | Gene name                                    | chr_start_end          | Day3 adjusted P-value | Day3 fold change | Day5 adjusted P-value | Day5 fold change | Day7 adjusted P-value | Day7 fold change |
|--------------|----------------------------------------------|------------------------|-----------------------|------------------|-----------------------|------------------|-----------------------|------------------|
| B4GALNT4     | N-acetyl-beta-glucosaminyl-glycoprotein      | 14 193343 203171       | 0.169782              | 1.60             | 0.266019              | 1.92             | 0.511524              | -1.33            |
| TCF25        | transcription factor 25 isoform X1           | 20 78311411 78352263   | 0.169782              | 1.14             | 0.298708              | -1.18            | 0.260408              | -1.13            |
| LOC107128240 |                                              | 19 37209733 37217448   | 0.169917              | -1.60            | 0.024207              | -3.25            | 0.040909              | 2.13             |
| TRIM47       | tripartite motif-containing protein 47 isofo | 16 73197833 73202195   | 0.169929              | -1.36            | 0.938999              | -1.05            | 0.698878              | -1.12            |
| PRKD1        | serine/threonine-protein kinase D1 isoform   | 7 93434880 93817368    | 0.170028              | 1.31             | 0.494657              | 1.27             | 0.765996              | 1.08             |
| CYFIP1       | cytoplasmic FMR1-interacting protein 1 is    | 7 736454 8211066       | 0.170028              | -1.09            | 0.550148              | 1.07             | 0.627185              | 1.04             |
| CX3CL1       | fractalkine                                  | 0 1173 4576            | 0.170044              | 1.70             | 0.658921              | 1.40             | 0.442045              | 1.42             |
| UNC5C        | netrin receptor UNC5C isoform X2             | 5 94403372 94788635    | 0.170306              | 1.42             | 0.675744              | 1.24             | 0.388333              | 1.29             |
| POLR2D       | DNA-directed RNA polymerase II subunit       | 12 3760154 3768842     | 0.170372              | -1.09            | 0.935039              | 1.01             | 0.475327              | -1.05            |
| PLPPR1       | uncharacterized protein LOC101925474         | 15 36424395 36563720   | 0.170423              | -2.11            | 0.658745              | -1.58            | 0.017073              | 3.43             |
| LOC107129632 | N-acetyllactosaminide beta-1,6-N-acetylgl    | 4 160354652 160355593  | 0.170484              | 1.37             | 0.692619              | 1.20             | 0.418590              | 1.24             |
| TSPAN14      | tetraspanin-14 isoform X2                    | 9 55411317 55455237    | 0.170484              | -1.16            | 0.400035              | 1.17             | 0.959162              | -1.01            |
| LNP1         | leukemia NUP98 fusion partner 1              | 2 171698545 171719292  | 0.170484              | -1.30            | 0.078295              | -1.62            | 0.471239              | 1.17             |
| ZNF593       | zinc finger protein 593                      | 1 202166604 202167335  | 0.170484              | -1.36            | 0.955278              | -1.04            | 0.506967              | -1.19            |
| CARD11       | LOW QUALITY PROTEIN: caspase recr            | 3 37918175 37973595    | 0.170731              | 1.38             | 0.810627              | -1.13            | 0.458277              | 1.23             |
| MAP2K7       | dual specificity mitogen-activated protein   | 19 8407455 8416888     | 0.170735              | 1.16             | 0.885953              | -1.04            | 0.825602              | -1.03            |
| FRS2         | fibroblast growth factor receptor substrate  | 11 68624864 68631018   | 0.171004              | -1.26            | 0.331145              | 1.31             | 0.367961              | 1.19             |
| LOC107127062 | Ig heavy chain V-I region 5-like             | 13 17786289 17786790   | 0.171029              | 2.30             | 0.521792              | 1.83             | 0.224253              | 1.94             |
| PIK3IP1      | phosphoinositide-3-kinase-interacting pro    | 10 20108379 20120358   | 0.171040              | 1.53             | 0.843310              | 1.15             | 0.942478              | 1.03             |
| MIS18BP1     | mis18-binding protein 1                      | 7 109469151 109516905  | 0.171040              | -1.32            | 0.496405              | 1.28             | 0.044797              | 1.51             |
| LOC107129228 |                                              | 3 93611757 93614203    | 0.171203              | 1.50             | 0.883028              | -1.12            | 0.800139              | -1.11            |
| NFIC         | uncharacterized protein LOC101925835         | 19 3324422 3429165     | 0.171203              | 1.27             | 0.932991              | 1.04             | 0.423916              | 1.18             |
| LOC107130343 |                                              | 7 155479033 155483002  | 0.171203              | -3.23            | 0.854975              | 1.51             | 0.187678              | 3.59             |
| EMX2         | homeobox protein EMX2 isoform X1             | 9 116763927 116768889  | 0.171291              | 6.42             | 1.000000              | 6.14             | 1.000000              | -8.70            |
| SPOCD1       | SPOC domain-containing protein 1 isoform     | 1 196225872 196253332  | 0.171291              | 2.29             | 0.514296              | -2.13            | 0.617891              | -1.48            |
| BHMT2        | S-methylmethionine--homocysteine S-me        | 6 77360424 77379295    | 0.171390              | 2.01             | 0.472694              | 1.95             | 0.533119              | -1.47            |
| CD3D         | T-cell surface glycoprotein CD3 delta cha    | 14 114319611 114323875 | 0.171474              | 1.41             | 0.144319              | -1.76            | 0.731991              | 1.11             |
| FAM110B      | protein FAM110B                              | 8 59267326 59268438    | 0.171474              | 1.34             | 0.402053              | -1.36            | 0.733321              | -1.11            |
| RPS9         | 40S ribosomal protein S9                     | 19 55068603 55075022   | 0.171474              | 1.18             | 0.811472              | -1.07            | 0.936453              | 1.01             |
| FHAD1        | forkhead-associated domain-containing pr     | 1 213122056 213278711  | 0.171485              | 1.36             | 0.896962              | 1.08             | 0.391624              | -1.26            |
| CFB          | complement factor B                          | 4 138901373 138907167  | 0.171685              | 1.73             | 0.840825              | 1.21             | 0.682835              | -1.23            |
| ZNF154       | zinc finger protein 154                      | 19 58342802 58350539   | 0.171820              | 1.26             | 0.020611              | -1.74            | 0.638666              | 1.11             |
| TFB2M        | dimethyladenosine transferase 2, mitocho     | 1 2773052 2803777      | 0.171857              | -1.21            | 0.953371              | 1.02             | 0.631366              | 1.08             |
| ORC5         | origin recognition complex subunit 5 isofo   | 3 136490637 136574085  | 0.171857              | -1.14            | 0.363109              | -1.16            | 0.396987              | 1.10             |
| CCNE1        | G1/S-specific cyclin-E1 isoform X1           | 19 30027176 30037573   | 0.171857              | -1.47            | 0.350692              | -1.57            | 0.413884              | 1.31             |
| LOC102138390 | DIS3-like exonuclease 2                      | 12 22952 30927         | 0.171915              | -1.27            | 0.608576              | -1.18            | 0.014581              | -1.50            |
| SLC43A3      | solute carrier family 43 member 3            | 14 16197893 16216553   | 0.171915              | -1.41            | 0.976357              | -1.02            | 0.455829              | -1.24            |
| LOC102115630 | LOW QUALITY PROTEIN: killer cell in          | 19 432 3097            | 0.172096              | -2.32            | 0.849440              | 1.75             | 0.167502              | 3.11             |
| GBAS         | protein NipSnap homolog 2                    | 3 64256817 64295729    | 0.172366              | 1.15             | 0.986857              | 1.00             | 0.744806              | 1.04             |
| FTL          | ferritin light chain isoform X1              | 19 49789650 49791198   | 0.172379              | -1.35            | 0.325728              | -1.44            | 0.723997              | 1.10             |
| XAB2         | pre-mRNA-splicing factor SYF1                | 19 7951369 7961916     | 0.172537              | 1.17             | 0.893197              | -1.04            | 0.528623              | -1.09            |
| TRIM31       | LOW QUALITY PROTEIN: E3 ubiquitin            | 4 140851217 140860660  | 0.172561              | 2.49             | 0.979469              | 1.05             | 0.977346              | -1.03            |
| LOC107128785 |                                              | 2 24136621 24266011    | 0.172561              | -1.60            | 0.834460              | 1.18             | 0.934082              | 1.04             |
| LOC107130871 | cytochrome P450 2C3-like                     | 9 93808144 93816617    | 0.172568              | 2.66             | 0.910226              | -1.21            | 0.108160              | -3.68            |
| ICAM5        | intercellular adhesion molecule 5            | 19 10566776 10573505   | 0.172568              | 1.75             | 0.616777              | 1.48             | 0.502519              | -1.39            |
| ZMYND19      | zinc finger MYND domain-containing pro       | 15 672453 679959       | 0.172693              | -1.28            | 0.601122              | -1.20            | 0.852340              | -1.05            |
| ITM2C        | integral membrane protein 2C                 | 12 120670229 120683282 | 0.172825              | 1.31             | 0.529876              | 1.26             | 0.177865              | 1.34             |
| NR1D2        | nuclear receptor subfamily 1 group D mem     | 2 23436616 23469640    | 0.172955              | 1.38             | 0.414334              | 1.39             | 0.105798              | 1.50             |
| IGF1R        | insulin-like growth factor 1 receptor isofo  | 7 79450679 79762853    | 0.173019              | 1.29             | 0.306991              | 1.38             | 0.904319              | -1.03            |
| CCT6A        | T-complex protein 1 subunit zeta             | 3 64180126 64191338    | 0.173019              | -1.23            | 0.831479              | 1.08             | 0.520090              | 1.12             |
| DYNLT1       | dynein light chain Tctex-type 1              | 4 65051146 65058717    | 0.173019              | -1.25            | 0.861177              | -1.07            | 0.877113              | 1.03             |
| LOC102138711 |                                              | 2 159199730 159230005  | 0.173127              | -1.78            | 0.806627              | -1.42            | 0.794854              | 1.18             |
| LOC102131817 |                                              | 7 114067409 114069265  | 0.173164              | 2.68             | 0.811782              | -1.47            | 0.773059              | 1.31             |
| ZBTB8A       | zinc finger and BTB domain-containing p      | 1 195379012 195391782  | 0.173164              | 1.28             | 0.591223              | 1.20             | 0.332791              | 1.22             |
| PTRF         | polymerase I and transcript release factor   | 16 54142980 54165737   | 0.173164              | 1.25             | 0.229741              | 1.38             | 0.855197              | -1.04            |
| POFUT1       | uncharacterized protein LOC101926410         | 10 63535945 63568928   | 0.173187              | 1.16             | 0.387726              | -1.18            | 0.361389              | 1.12             |
| MLXIP        | MLX-interacting protein                      | 11 126130479 126342602 | 0.173291              | 1.17             | 0.914011              | -1.03            | 0.267232              | 1.16             |
| SLC25A26     | S-adenosylmethionine mitochondrial carri     | 2 121815586 121976579  | 0.173322              | 1.18             | 0.456277              | -1.17            | 0.081596              | -1.24            |
| GLT8D1       | glycosyltransferase 8 domain-containing p    | 2 107993191 107999192  | 0.173336              | 1.09             | 0.704442              | -1.05            | 0.845934              | -1.02            |
| CCR1         | C-C chemokine receptor type 1                | 2 101213959 101215026  | 0.173356              | -1.75            | 0.827976              | -1.23            | 0.887420              | -1.08            |
| ARHGAP25     | rho GTPase-activating protein 25 isoform     | 13 41163203 41254241   | 0.173380              | 1.25             | 0.701682              | -1.14            | 0.203285              | 1.26             |
| WDR4         | tRNA (guanine-N(7))-methyltransferase        | 3 3889942 3921610      | 0.173380              | -1.29            | 0.658413              | -1.18            | 0.380712              | 1.21             |
| LOC107130904 |                                              | 9 121310831 121315356  | 0.173474              | 1.81             | 0.886381              | 1.18             | 0.063333              | -2.44            |
| ATP8B2       | phospholipid-transporting ATPase ID isofo    | 1 97476697 97499595    | 0.173474              | 1.33             | 0.991570              | 1.01             | 0.231462              | 1.32             |
| RAB11B       | uncharacterized protein LOC101926365         | 19 8769957 8784905     | 0.173520              | 1.19             | 0.870019              | -1.05            | 0.401356              | -1.13            |
| SHFM1        | 26S proteasome complex subunit DSS1          | 3 115272104 115294019  | 0.173520              | -1.16            | 0.489437              | -1.14            | 0.400981              | -1.11            |
| ZNF474       | zinc finger protein 474                      | 6 121096234 121097328  | 0.173681              | 4.68             | 1.000000              | -3.90            | 0.638586              | -1.85            |
| LOC102133268 | ATP-binding cassette sub-family A memb       | 20 20611161 20774496   | 0.173681              | 2.87             | 0.324204              | -3.72            | 0.703870              | -1.40            |
| LOC102140330 |                                              | 2 55792665 56010766    | 0.173681              | 1.97             | 0.019803              | 5.53             | 0.714419              | -1.27            |
| RETSAT       | all-trans-retinol 13,14-reductase            | 13 24102034 24112660   | 0.173681              | 1.30             | 0.973810              | -1.02            | 0.059326              | -1.45            |
| ADCY3        | adenylate cyclase type 3 isoform X3          | 13 86002432 86116596   | 0.173681              | 1.25             | 0.889605              | 1.06             | 0.098594              | 1.33             |
| PDE7A        | high affinity cAMP-specific 3',5'-cyclic ph  | 8 66931550 67056822    | 0.173681              | -1.27            | 0.662458              | -1.16            | 0.592005              | 1.12             |
| SERPINB1     | leukocyte elastase inhibitor                 | 4 168227531 168234647  | 0.173809              | -1.62            | 0.440949              | 1.62             | 0.551381              | -1.29            |
| VCAM1        | vascular cell adhesion protein 1             | 1 126068366 126086679  | 0.173822              | 1.74             | 0.696630              | 1.38             | 0.550826              | -1.34            |
| LOC102136705 |                                              | 10 62744405 62746966   | 0.173965              | -3.10            | 1.000000              | -1.16            | 0.802868              | 1.30             |
| VWA3A        |                                              | 20 20912470 20989750   | 0.174280              | 1.31             | 0.160541              | 1.55             | 0.955020              | 1.02             |
| ZNF318       | zinc finger protein 318                      | 4 127195089 127229639  | 0.174280              | 1.11             | 0.441567              | -1.11            | 0.679130              | -1.04            |
| CAMSAP2      | calmodulin-regulated spectrin-associated     | 1 59099366 59214539    | 0.174280              | -1.30            | 0.104267              | 1.60             | 0.545004              | 1.15             |
| GZMB         | granzyme B                                   | 7 88406089 88409285    | 0.174330              | 1.30             | 0.523602              | -1.25            | 0.092135              | 1.41             |
| TBL1X        | F-box-like/WD repeat-containing protein      | X 7310172 7376125      | 0.174363              | 1.36             | 0.954085              | -1.04            | 0.935670              | -1.03            |
| NOVA2        | RNA-binding protein Nova-2                   | 19 46851088 46866463   | 0.174366              | 1.42             | 0.298708              | 1.56             | 0.782604              | -1.10            |
| DNMT3B       | DNA (cytosine-5)-methyltransferase 3B is     | 10 64152373 64182279   | 0.174422              | 1.23             | 0.425170              | -1.23            | 0.118738              | 1.28             |
| RSU1         | ras suppressor protein 1 isoform X2          | 9 17111942 17359028    | 0.174422              | -1.27            | 0.924840              | 1.04             | 0.536393              | 1.14             |
| ANPEP        | aminopeptidase N                             | 7 70041951 70064465    | 0.174422              | -1.61            | 0.755091              | 1.26             | 0.297151              | -1.52            |
| TESC         | calcineurin B homologous protein 3 isofo     | 11 120811008 120873589 | 0.174577              | 1.26             | 0.267443              | -1.36            | 0.211429              | 1.27             |
| MYO9A        | unconventional myosin-Ix isoform X5          | 7 49638668 49870519    | 0.174577              | 1.26             | 0.241345              | 1.38             | 0.776574              | -1.07            |
| NDUFB3       | NADH dehydrogenase [ubiquinone] 1 bet        | 12 90447276 90452822   | 0.174577              | -1.16            | 0.277925              | -1.21            | 0.769279              | -1.04            |



| Gene symbol  | Gene name                                     | chr_start_end          | Day3 adjusted P-value | Day3 fold change | Day5 adjusted P-value | Day5 fold change | Day7 adjusted P-value | Day7 fold change |
|--------------|-----------------------------------------------|------------------------|-----------------------|------------------|-----------------------|------------------|-----------------------|------------------|
| TMEM206      | transmembrane protein 206 isoform X4          | 1 70956721 71003473    | 0.174721              | -1.21            | 0.885953              | 1.05             | 0.819926              | -1.04            |
| SENP6        | sentrin-specific protease 6 isoform X4        | 4 98273798 98389090    | 0.174930              | -1.18            | 0.711897              | 1.09             | 0.367213              | 1.13             |
| KDM5C        | lysine-specific demethylase 5C isoform X      | X 52237125 52285869    | 0.175003              | 1.18             | 0.712257              | -1.10            | 0.467419              | 1.11             |
| CCL25        | C-C motif chemokine 25 isoform X2             | 19 8249402 8257424     | 0.175117              | 1.62             | 0.685169              | 1.32             | 0.045810              | -2.03            |
| ACER3        | alkaline ceramidase 3 isoform X1              | 14 72175997 72339382   | 0.175236              | -1.22            | 0.598308              | 1.16             | 0.564173              | 1.11             |
| NAA50        | N(alpha)-acetyltransferase 50, NatE cataly    | 2 158514388 158538391  | 0.175236              | -1.41            | 0.527283              | 1.34             | 0.750778              | 1.15             |
| CABYR        | calcium-binding tyrosine phosphorylation      | 18 58106342 58122729   | 0.175250              | -1.49            | 0.718056              | -1.24            | 0.253615              | -1.46            |
| ACRC         | acidic repeat-containing protein isoform X    | X 68614094 68651838    | 0.175250              | -1.54            | 0.859355              | 1.14             | 0.482120              | -1.30            |
| PNPLA7       | patatin-like phospholipase domain-contain     | 15 708130 799397       | 0.175261              | 1.32             | 0.596562              | 1.23             | 0.387339              | -1.22            |
| BPIFB1       | BPI fold-containing family B member 1         | 10 64635193 64658967   | 0.175403              | 6.02             | 0.810096              | 2.05             | 0.852254              | -1.39            |
| FCRL1        | Fc receptor-like protein 1 isoform X4         | 1 93904016 93927832    | 0.175403              | 1.87             | 0.367793              | -2.07            | 0.546771              | 1.40             |
| APBB1        | amyloid beta A4 precursor protein-binding     | 14 61706667 61721904   | 0.175403              | 1.34             | 0.710740              | 1.18             | 0.624487              | -1.14            |
| MARK2        | serine/threonine-protein kinase MARK2 is      | 14 10667380 10744058   | 0.175403              | 1.14             | 0.387833              | -1.15            | 0.974697              | -1.00            |
| ODF2L        | outer dense fiber protein 2-like isoform X    | 1 140907409 140946554  | 0.175422              | -1.34            | 0.668124              | 1.20             | 0.613190              | -1.14            |
| BAG4         | BAG family molecular chaperone regulato       | 8 38989149 39026508    | 0.175528              | -1.25            | 0.313417              | 1.32             | 0.376955              | 1.18             |
| HES2         | transcription factor HES-2                    | 1 221948056 221948996  | 0.175639              | 4.10             | 0.982070              | -1.06            | 0.988773              | -1.02            |
| GAR1         | H/ACA ribonucleoprotein complex subun         | 5 109191714 109200355  | 0.175694              | -1.28            | 0.732975              | 1.14             | 0.947783              | -1.02            |
| UBE3A        | ubiquitin-protein ligase E3A isoform X4       | 7 3342205 3410276      | 0.175695              | -1.19            | 0.211565              | 1.29             | 0.736696              | 1.06             |
| LOC102116649 | uncharacterized protein LOC102116649          | 0 17352 18380          | 0.175727              | -1.30            | 0.857590              | -1.09            | 0.919832              | -1.03            |
| SLC15A4      | solute carrier family 15 member 4             | 11 133172029 133204149 | 0.175734              | -1.19            | 0.805498              | -1.07            | 0.777898              | 1.05             |
| KLHL15       | kelch-like protein 15 isoform X2              | X 21961288 21984231    | 0.175838              | -1.29            | 0.158302              | 1.51             | 0.184729              | 1.31             |
| DMXL2        | dmX-like protein 2 isoform X4                 | 7 28440327 28613400    | 0.175945              | -1.59            | 0.893639              | -1.12            | 0.653054              | 1.21             |
| TGFB2        | TGF-beta receptor type-2 isoform X2           | 2 16740658 16825933    | 0.175961              | 1.21             | 0.299150              | 1.28             | 0.210626              | 1.22             |
| LOC107131116 | uncharacterized protein LOC107131116          | 10 72329680 72574552   | 0.175996              | 1.87             | 0.130360              | 3.27             | 0.045828              | -2.60            |
| UBASH3A      | ubiquitin-associated and SH3 domain-con       | 3 4319789 4356649      | 0.175996              | 1.35             | 0.027733              | -1.92            | 0.108160              | 1.43             |
| CCDC7        | coiled-coil domain-containing protein 7 is    | 9 33069608 33257093    | 0.175996              | -1.36            | 0.668137              | -1.20            | 0.524366              | -1.19            |
| MGAT5B       | alpha-1,6-mannosylglycoprotein 6-beta-N       | 16 74250917 74329499   | 0.176059              | 2.52             | 0.877408              | -1.32            | 0.670086              | 1.42             |
| KANK2        | KN motif and ankyrin repeat domain-cont       | 19 11492708 11525574   | 0.176059              | 1.19             | 0.677355              | 1.18             | 0.924796              | -1.03            |
| ZNF282       | zinc finger protein 282                       | 3 182256697 182286077  | 0.176059              | 1.16             | 0.287522              | -1.21            | 0.965138              | 1.01             |
| PBX1P1       | pre-B-cell leukemia transcription factor-in   | 1 96852574 96861886    | 0.176061              | 1.22             | 0.995971              | 1.00             | 0.379748              | -1.16            |
| SLC38A2      | sodium-coupled neutral amino acid transp      | 11 45051416 45061593   | 0.176061              | -1.34            | 0.600706              | 1.24             | 0.887420              | 1.04             |
| LRP6         | low-density lipoprotein receptor-related p    | 11 12688801 12837447   | 0.176068              | 1.42             | 0.896962              | -1.09            | 0.320483              | 1.34             |
| DNAJB12      | dnaJ homolog subfamily B member 12 iso        | 9 63271978 63302307    | 0.176068              | 1.11             | 0.816784              | -1.04            | 0.040991              | -1.18            |
| FAM217B      | protein FAM217B                               | 10 91853263 91854414   | 0.176068              | -1.19            | 0.033740              | 1.49             | 0.016451              | 1.38             |
| ZNF777       | zinc finger protein 777                       | 3 182496908 182521395  | 0.176159              | 1.15             | 0.573089              | -1.12            | 0.466061              | 1.09             |
| IGBP1        | immunoglobulin-binding protein 1              | X 67170812 67202377    | 0.176376              | 1.19             | 0.913808              | 1.04             | 0.232214              | -1.19            |
| ST8SIA2      | alpha-2,8-sialyltransferase 8B isoform X2     | 7 72969776 73042074    | 0.176398              | 2.01             | 0.087087              | 3.74             | 0.883235              | -1.10            |
| NREP         | neuronal regeneration-related protein isof    | 6 110454416 110479362  | 0.176598              | -1.28            | 0.447137              | -1.27            | 0.217173              | 1.26             |
| TCOF1        | treacle protein isoform X1                    | 6 149706802 149745368  | 0.176689              | 1.18             | 0.681168              | -1.10            | 0.471319              | 1.11             |
| STAR3D3NL    | MLN64 N-terminal domain homolog isofo         | 3 82246960 82268437    | 0.176689              | -1.16            | 0.969792              | 1.01             | 0.865985              | 1.03             |
| TOMM40       | mitochondrial import receptor subunit TO      | 19 45636778 45648858   | 0.176920              | -1.26            | 0.956009              | 1.03             | 0.978223              | -1.01            |
| ITM2A        | integral membrane protein 2A                  | X 76468828 76474933    | 0.176926              | 1.42             | 0.329870              | 1.53             | 0.143407              | 1.51             |
| SLC7A11      | cystine/glutamate transporter isoform X1      | 5 137418612 137508923  | 0.177127              | -1.50            | 0.000000              | -6.62            | 0.064678              | -1.83            |
| IL17RB       | interleukin-17 receptor B isoform X1          | 2 109182452 109202785  | 0.177149              | 2.04             | 0.326600              | -2.54            | 0.916215              | -1.08            |
| LOC107126791 | uncharacterized protein LOC107126791          | 11 121862744 121868323 | 0.177199              | 1.25             | 0.918333              | -1.04            | 0.405926              | 1.17             |
| CSRN3        | cysteine/serine-rich nuclear protein 3 isofo  | 12 54448016 54549924   | 0.177199              | -1.60            | 0.754553              | 1.26             | 0.917628              | -1.05            |
| MINA         | bifunctional lysine-specific demethylase a    | 2 174005455 174032375  | 0.177418              | -1.24            | 0.928186              | 1.04             | 0.820820              | 1.05             |
| SNX21        | sorting nexin-21 isoform X1                   | 10 77501537 77508994   | 0.177506              | -1.28            | 0.990598              | -1.01            | 0.692474              | -1.10            |
| SMIM1        | small integral membrane protein 1             | 1 224687156 224687710  | 0.177523              | 1.52             | 0.527892              | 1.45             | 0.265456              | -1.48            |
| VTGN1        | V-set domain-containing T-cell activation     | 1 109511982 109604326  | 0.177592              | 1.54             | 0.526715              | 1.45             | 0.545958              | -1.26            |
| LOC107130545 | uncharacterized protein LOC107130545          | 8 8073383 8082289      | 0.177730              | -1.57            | 0.794970              | 1.21             | 0.392606              | -1.38            |
| LOC102120029 | uncharacterized protein LOC102120029          | 7 95490949 95499393    | 0.177893              | 2.16             | 0.861904              | -1.29            | 0.999052              | 1.00             |
| LOC102140681 | uncharacterized protein LOC102140681          | 14 112082725 112444966 | 0.177893              | -2.40            | 0.366772              | -2.58            | 0.322478              | -2.11            |
| IK           | protein Red                                   | 6 139773921 139788967  | 0.177992              | 1.14             | 0.976537              | -1.01            | 0.620272              | -1.09            |
| DNAAF2       | protein kintoun isoform X1                    | 7 9542 18255           | 0.178257              | -1.23            | 0.861042              | 1.07             | 0.588378              | 1.11             |
| CAMK2A       | calcium/calmodulin-dependent protein kin      | 6 149572657 149638995  | 0.178497              | 1.43             | 0.625907              | 1.29             | 0.832721              | 1.08             |
| DCAF7        | DDB1- and CUL4-associated factor 7            | 16 60848320 60878830   | 0.178497              | 1.18             | 0.927990              | 1.03             | 0.560601              | 1.09             |
| LOC102131474 | uncharacterized protein LOC102131474          | 3 117745193 117890745  | 0.178497              | -1.83            | 0.938287              | -1.09            | 0.982195              | 1.01             |
| ASP          | uncharacterized protein LOC101926819          | 15 106640370 106655984 | 0.178497              | -2.15            | 0.436939              | 2.18             | 0.497532              | 1.57             |
| AP4E1        | AP-4 complex subunit epsilon-1                | 7 27907355 27993808    | 0.178547              | -1.25            | 0.664367              | 1.15             | 0.801507              | 1.06             |
| GAN          | gigaxonin                                     | 20 69585754 69647265   | 0.178547              | -1.48            | 0.969357              | -1.03            | 0.707321              | 1.15             |
| SERPINA1     | alpha-1-antitrypsin isoform X2                | 7 159411603 159432943  | 0.178547              | -2.09            | 0.934798              | -1.12            | 0.182759              | 2.24             |
| SLFN14       | schlafen family member 14                     | 16 31912096 31920164   | 0.178573              | 2.71             | 1.000000              | 7.01             | 0.697619              | -1.42            |
| STAT6        | signal transducer and activator of transcrip  | 11 56050040 56061725   | 0.178573              | 1.12             | 0.935150              | -1.02            | 0.210219              | -1.13            |
| SOWAHD       | ankyrin repeat domain-containing protein      | X 116482638 116483585  | 0.178573              | -1.33            | 0.453110              | -1.33            | 0.998900              | 1.00             |
| C1H1orf53    | uncharacterized protein C1orf53 homolog       | 1 56216321 56222032    | 0.178573              | -1.71            | 0.251957              | 2.04             | 0.572573              | -1.30            |
| FYTTD1       | UAP56-interacting factor isoform X2           | 19 38693 101242        | 0.178589              | -1.35            | 0.299648              | 1.46             | 0.650955              | 1.13             |
| LOC107127514 | uncharacterized protein LOC107127514          | 15 7022764 7024646     | 0.178689              | -2.57            | 0.698440              | 1.58             | 0.085500              | -3.06            |
| PDIA2        | protein disulfide-isomerase A2                | 20 275949 279817       | 0.178816              | 2.72             | 0.973217              | 1.08             | 0.213453              | -2.96            |
| TRIOBP       | TRIO and F-actin-binding protein              | 10 13473988 13512829   | 0.178986              | 1.11             | 0.785012              | 1.05             | 0.968197              | -1.00            |
| TRAF3IP3     | TRAF3-interacting JNK-activating modul        | 1 68333227 68358618    | 0.179000              | 1.25             | 0.052402              | -1.60            | 0.213242              | 1.26             |
| DNAJC30      | uncharacterized protein LOC101925092          | 3 48343346 48344026    | 0.179067              | 1.16             | 0.966170              | 1.01             | 0.076236              | 1.23             |
| LOC102131644 | uncharacterized protein LOC102131644          | 4 147941571 147973820  | 0.179134              | 2.11             | 0.552627              | 1.85             | 0.662048              | 1.35             |
| DDB1         | DNA damage-binding protein 1                  | 14 12938147 12973083   | 0.179348              | 1.15             | 0.686155              | -1.09            | 0.905165              | 1.02             |
| LOC102123683 | uncharacterized protein LOC102123683          | 6 181257846 181262648  | 0.179430              | 3.01             | 1.000000              | -1.50            | 0.419175              | -2.22            |
| THOC2        | THO complex subunit 2 isoform X6              | X 120335018 120456399  | 0.179430              | -1.15            | 0.882089              | 1.04             | 0.227009              | 1.15             |
| ZCWPW2       | zinc finger CW-type PWWP domain prot          | 2 18995143 19106330    | 0.179430              | -1.55            | 0.852788              | 1.15             | 0.854146              | 1.08             |
| SMPDL3A      | acid sphingomyelinase-like phosphodiester     | 4 26833564 26852709    | 0.179430              | -1.59            | 0.890603              | -1.12            | 0.096547              | 1.84             |
| PCMTD2       | protein-L-isoaspartate O-methyltransferas     | 10 96484619 96497654   | 0.179511              | -1.23            | 0.941565              | 1.03             | 0.832835              | -1.04            |
| LOC102122647 | putative elongation factor 1-alpha-like 3     | X 83311296 83312451    | 0.179770              | 5.04             | 1.000000              | -5.96            | 1.000000              | -1.05            |
| HYAL2        | hyaluronidase-2                               | 2 105565470 105567823  | 0.179770              | 1.30             | 0.051967              | 1.72             | 0.647245              | 1.11             |
| VGLL1        | transcription cofactor vestigial-like protein | X 133303721 133334765  | 0.179852              | 1.73             | 0.038026              | 4.23             | 0.645272              | -1.24            |
| LRRC4C       | leucine-rich repeat-containing protein 4C     | 14 27441647 27443569   | 0.179852              | 1.51             | 0.763077              | -1.21            | 0.644899              | -1.19            |
| BIN3         | bridging integrator 3                         | 8 22790823 22838723    | 0.179852              | 1.21             | 0.803978              | 1.08             | 0.591479              | -1.10            |
| GABPA        | GA-binding protein alpha chain                | 3 21216732 21244844    | 0.179852              | -1.35            | 0.103884              | 1.73             | 0.253615              | 1.33             |
| LRRC71       | leucine-rich repeat-containing protein 71 i   | 1 94767872 94779569    | 0.180038              | 4.86             | 0.965744              | -1.17            | 0.528623              | -2.46            |
| NCKAP5L      | nck-associated protein 5-like isoform X2      | 11 48652454 48664990   | 0.180328              | 1.14             | 0.185403              | -1.22            | 0.537439              | -1.07            |

| Gene symbol  | Gene name                                    | chr_start_end          | Day3 adjusted P-value | Day3 fold change | Day5 adjusted P-value | Day5 fold change | Day7 adjusted P-value | Day7 fold change |
|--------------|----------------------------------------------|------------------------|-----------------------|------------------|-----------------------|------------------|-----------------------|------------------|
| NRGN         | neurogranin                                  | 14 120537950 120543598 | 0.180357              | 1.43             | 0.618803              | 1.28             | 0.095976              | -1.59            |
| ARSL         | arylsulfatase J isoform X2                   | 5 113318982 113393944  | 0.180357              | -1.55            | 0.790546              | 1.21             | 0.696683              | 1.17             |
| LOC107130059 |                                              | 6 121055489 121089978  | 0.180414              | 6.95             | 1.000000              | 1.83             | 1.000000              | 1.02             |
| MTMR1        | myotubularin-related protein 1 isoform X     | X 147630859 147706335  | 0.180414              | 1.15             | 0.892768              | -1.03            | 0.359712              | 1.11             |
| PRDM12       | PR domain zinc finger protein 12             | 15 8350914 8374488     | 0.180414              | -2.11            | 0.643457              | -1.73            | 0.101594              | 3.91             |
| YWHAQ        | 14-3-3 protein theta                         | 13 101364587 101413681 | 0.180451              | -1.27            | 0.636800              | 1.18             | 0.470304              | 1.17             |
| ATP6V1F      | V-type proton ATPase subunit F isoform       | 3 161508929 161511786  | 0.180453              | -1.29            | 0.329754              | -1.37            | 0.154558              | -1.34            |
| PTGES3       | prostaglandin E synthase 3 isoform X3        | 11 55618419 55643772   | 0.180490              | -1.30            | 0.534867              | 1.25             | 0.576608              | 1.14             |
| RALGPS1      | ras-specific guanine nucleotide-releasing f  | 15 101562480 101823641 | 0.180515              | 1.19             | 0.941795              | 1.03             | 0.799331              | -1.04            |
| MYH9         | myosin-9                                     | 10 14938573 15004353   | 0.180583              | 1.21             | 0.879471              | -1.05            | 0.101145              | 1.28             |
| CADM1        | cell adhesion molecule 1 isoform X6          | 14 111141368 111472666 | 0.180667              | -1.21            | 0.501026              | -1.19            | 0.481701              | 1.13             |
| MKNK2        | MAP kinase-interacting serine/threonine-p    | 19 1885211 1894250     | 0.180835              | 1.21             | 0.318130              | 1.27             | 0.756680              | 1.06             |
| SUV39H2      | histone-lysine N-methyltransferase SUV3      | 9 15397818 15421246    | 0.180835              | -1.44            | 0.818118              | 1.15             | 0.967768              | -1.02            |
| LOC107128743 | uncharacterized protein LOC107128743         | 0 1175 1615            | 0.180890              | 1.82             | 0.311375              | -2.02            | 0.448125              | 1.49             |
| LOC107128926 | zinc finger protein 543                      | 2 99673486 99674100    | 0.180890              | 1.78             | 0.966170              | -1.06            | 0.699682              | 1.22             |
| ZBTB4        | zinc finger and BTB domain-containing p      | 16 7522559 7527099     | 0.180890              | 1.37             | 0.503585              | 1.33             | 0.794552              | -1.08            |
| NUDT15       | probable 8-oxo-dGTP diphosphatase NUD        | 17 27195854 27205378   | 0.180890              | -1.36            | 0.988314              | 1.01             | 0.320037              | 1.30             |
| LOC107126997 | ERV-BabFenv provirus ancestral Env po        | 12 31222579 31277814   | 0.180890              | -2.27            | 0.200018              | 6.59             | 0.078204              | -3.76            |
| KAT6B        | histone acetyltransferase KAT6B isoform      | 9 60559634 60743255    | 0.180946              | 1.27             | 0.735501              | 1.13             | 0.574716              | 1.13             |
| PCDH10       | protocadherin-10 isoform X1                  | 5 132173372 132231347  | 0.181004              | -1.67            | 0.196564              | 2.22             | 0.007394              | -2.48            |
| LOC102124188 |                                              | 12 105232359 105269294 | 0.181187              | 4.23             | 1.000000              | 1.41             | 0.950284              | -1.07            |
| DTHD1        | death domain-containing protein 1            | 5 35897048 35963239    | 0.181187              | 2.60             | 0.640388              | 2.11             | 0.403173              | -2.13            |
| HOMER1       | homer protein homolog 1 isoform X1           | 6 77675250 77810616    | 0.181208              | 1.39             | 0.366052              | 1.47             | 0.918440              | 1.04             |
| MTIF3        | translation initiation factor IF-3, mitochon | 17 7246378 7260956     | 0.181208              | -1.16            | 0.871496              | 1.05             | 0.848471              | -1.03            |
| GXYLT1       | glucoside xylosyltransferase 1               | 11 40624812 40681052   | 0.181338              | -1.26            | 0.426942              | 1.27             | 0.459492              | 1.16             |
| CECR2        | cat eye syndrome critical region protein 2   | 10 33193208 33406481   | 0.181392              | 1.45             | 0.724980              | -1.22            | 0.129350              | -1.57            |
| PAK4         | serine/threonine-protein kinase PAK 4        | 19 39663091 39671995   | 0.181392              | 1.32             | 0.596504              | 1.23             | 0.992274              | -1.00            |
| FANCG        | Fanconi anemia group G protein isoform       | 15 44073569 44079028   | 0.181392              | -1.17            | 0.175800              | -1.28            | 0.808545              | 1.04             |
| ACBD6        | acyl-CoA-binding domain-containing pro       | 1 38240638 38462917    | 0.181443              | -1.10            | 0.832551              | -1.03            | 0.528520              | 1.05             |
| LOC101925844 | uncharacterized protein LOC101925844         | 8 38528993 38529553    | 0.181487              | 1.59             | 0.173592              | 2.21             | 0.568913              | -1.29            |
| TSFM         | elongation factor Ts, mitochondrial isofor   | 11 56780079 56798952   | 0.181522              | -1.16            | 0.937184              | 1.02             | 0.837182              | -1.03            |
| CD2          | T-cell surface antigen CD2 precursor         | 1 109988106 110002704  | 0.181532              | 1.47             | 0.489049              | -1.43            | 0.501787              | 1.26             |
| APIAR        | AP-1 complex-associated regulatory prote     | 5 111591040 111628800  | 0.181609              | -1.34            | 0.086468              | 1.76             | 0.996453              | -1.00            |
| TLN1         | talin-1 isoform X1                           | 15 43385111 43413037   | 0.181669              | 1.21             | 0.888178              | 1.05             | 0.501552              | 1.12             |
| CACYBP       | calcyclin-binding protein isoform X1         | 1 32926498 32936936    | 0.181683              | -1.13            | 0.440356              | 1.13             | 0.974647              | 1.00             |
| TXNDC11      | thioredoxin domain-containing protein 11     | 20 11956456 12020796   | 0.181784              | 1.09             | 0.831558              | -1.03            | 0.760546              | -1.03            |
| ATP4A        | potassium-transporting ATPase alpha cha      | 19 36002546 36018261   | 0.181784              | -2.06            | 0.973972              | -1.05            | 0.884192              | -1.11            |
| LOC102125980 | zinc finger X-linked protein ZXDB-like       | X 56909786 56970314    | 0.181813              | -1.25            | 0.026042              | 1.70             | 0.797398              | 1.06             |
| RAB33A       | ras-related protein Rab-33A                  | X 127052925 127066662  | 0.181846              | 1.96             | 0.390807              | 2.81             | 0.883749              | -1.11            |
| TMEM63A      | CSC1-like protein 1 isoform X2               | 1 84653661 84684454    | 0.181984              | 1.18             | 0.582723              | 1.14             | 0.976671              | -1.01            |
| C15H9orf78   | uncharacterized protein C9orf78 homolog      | 15 9251779 9259121     | 0.182067              | 1.15             | 0.722039              | -1.08            | 0.737262              | 1.05             |
| ARF4         | uncharacterized protein LOC101866149         | 2 112886167 112910319  | 0.182067              | -1.42            | 0.603688              | 1.29             | 0.809976              | 1.09             |
| C4H6orf132   | uncharacterized protein C6orf132 homolo      | 4 128482227 128522739  | 0.182074              | 1.28             | 0.385822              | 1.32             | 0.012339              | -1.57            |
| C3H7orf43    | uncharacterized protein C7orf43 homolo       | 3 44525500 44528979    | 0.182124              | -1.18            | 0.452028              | -1.18            | 0.533874              | -1.10            |
| TIE1         | tyrosine-protein kinase receptor Tie-1 isof  | 1 184290824 184313578  | 0.182150              | 1.41             | 0.361871              | 1.48             | 0.817276              | 1.08             |
| DROSHA       | ribonuclease 3 isoform X8                    | 6 32034372 32172521    | 0.182225              | 1.13             | 0.767899              | 1.06             | 0.865446              | -1.02            |
| NDUFAB1      | uncharacterized protein LOC101866670         | 20 22538108 22548698   | 0.182225              | -1.16            | 0.939680              | -1.02            | 0.097883              | -1.21            |
| ATG9B        | autophagy-related protein 9B                 | 3 183703822 183712276  | 0.182488              | 1.71             | 0.533741              | -1.64            | 0.353675              | -1.53            |
| LOC102138098 | zinc finger protein 43                       | 19 21928908 21963723   | 0.182491              | -1.33            | 0.294494              | 1.45             | 0.135184              | 1.41             |
| LOC102146964 |                                              | 8 7042682 7045905      | 0.182516              | 5.46             | 1.000000              | 1.90             | 0.226264              | -3.71            |
| CEP126       | centrosomal protein of 126 kDa isoform X     | 14 97848515 97925514   | 0.182536              | 1.86             | 0.907411              | -1.17            | 0.936748              | -1.06            |
| IRX6         | iroquois-class homeodomain protein IRX       | 20 43200189 43205376   | 0.182600              | 2.28             | 0.335125              | -2.86            | 0.397557              | 1.84             |
| LOC107128271 | zinc finger protein 813-like isoform X1      | 19 54097661 54105799   | 0.182600              | 1.41             | 0.887083              | 1.09             | 0.776574              | 1.10             |
| CAMK4        | calcium/calmodulin-dependent protein kir     | 6 109937881 110211180  | 0.182600              | 1.36             | 0.240384              | -1.53            | 0.932729              | -1.03            |
| LOC102145582 |                                              | 1 209190988 209221737  | 0.182600              | 1.27             | 0.587836              | -1.21            | 0.866299              | 1.04             |
| KIAA0319L    | dyslexia-associated protein KIAA0319-lik     | 1 192340587 192464591  | 0.182600              | 1.25             | 0.579805              | -1.19            | 0.977740              | -1.01            |
| FAM8A1       | protein FAM8A1                               | 4 153029515 153037335  | 0.182600              | -1.24            | 0.534475              | 1.20             | 0.469660              | 1.14             |
| LOC102122937 |                                              | 14 113768287 113782526 | 0.182618              | 2.18             | 0.145298              | -8.44            | 0.211313              | -2.44            |
| PIGY         | phosphatidylinositol N-acetylglucosaminy     | 5 87664947 87665162    | 0.182618              | -1.08            | 0.816409              | -1.03            | 0.191881              | 1.09             |
| PYURF        | protein preY, mitochondrial                  | 5 87665258 87667073    | 0.182618              | -1.08            | 0.816409              | -1.03            | 0.191881              | 1.09             |
| DNAJC15      | dnal homolog subfamily C member 15 iso       | 17 22202744 22290465   | 0.182618              | -1.14            | 0.020340              | 1.38             | 0.748210              | -1.04            |
| GPR176       | probable G-protein coupled receptor 176      | 7 16570600 16690676    | 0.182622              | 1.49             | 0.276378              | -1.68            | 0.098673              | 1.66             |
| LOC107130229 |                                              | 7 40957040 40960075    | 0.182943              | -1.70            | 0.978502              | 1.03             | 0.877079              | 1.08             |
| SLC9A4       | sodium/hydrogen exchanger 4                  | 13 6844421 6902085     | 0.183043              | 6.47             | 0.677538              | -3.82            | 0.954015              | -1.14            |
| TRAPPC3      | trafficking protein particle complex subun   | 1 191705505 191717327  | 0.183043              | -1.14            | 0.375074              | -1.16            | 0.115838              | -1.17            |
| LOC107127417 | serine/arginine-rich splicing factor 8-like  | 14 90915746 90916558   | 0.183043              | -1.23            | 0.755802              | 1.11             | 0.790193              | -1.06            |
| LHX9         | LIM/homeobox protein Lhx9 isoform X1         | 1 56232736 56246879    | 0.183043              | -6.20            | 1.000000              | 2.62             | 1.000000              | -2.03            |
| LOC102144782 | HLA class II histocompatibility antigen, D   | 4 138123680 138129985  | 0.183093              | 1.35             | 0.905371              | 1.07             | 0.957565              | 1.02             |
| TRAPPC4      | trafficking protein particle complex subun   | 14 115047436 115052235 | 0.183157              | -1.14            | 0.861214              | -1.04            | 0.667700              | -1.05            |
| ANKRD13C     | ankyrin repeat domain-containing protein     | 1 156998708 157087297  | 0.183157              | -1.21            | 0.216487              | 1.33             | 0.169225              | 1.24             |
| GCHFR        | GTP cyclohydrolase 1 feedback regulator      | 7 17622136 17625830    | 0.183164              | 1.61             | 0.697829              | 1.32             | 0.457874              | -1.36            |
| LOC102124611 |                                              | 0 2738 3495            | 0.183164              | 1.39             | 0.775173              | 1.16             | 0.035089              | -1.70            |
| SLC22A17     | solute carrier family 22 member 17 isofor    | 7 87067117 87072683    | 0.183164              | 1.32             | 0.646108              | 1.20             | 0.968076              | -1.01            |
| TMCO4        | transmembrane and coiled-coil domain-cc      | 1 208643261 208744999  | 0.183164              | 1.14             | 0.218219              | -1.22            | 0.308763              | -1.12            |
| GPBB1L1      | vasculin-like protein 1                      | 1 181913973 181946575  | 0.183164              | 1.12             | 0.838045              | -1.04            | 0.352264              | -1.10            |
| AKIP1        | A-kinase-interacting protein 1 isoform X2    | 14 58916569 58925081   | 0.183164              | -1.17            | 0.991570              | -1.00            | 0.027981              | -1.29            |
| LOC102128824 | general transcription factor IIIH subunit 3  | 11 2059 7877           | 0.183164              | -1.21            | 0.793556              | -1.09            | 0.448740              | 1.13             |
| FAM195A      | LOW QUALITY PROTEIN: protein FAN             | 20 666175 671590       | 0.183164              | -1.40            | 0.882501              | -1.09            | 0.148820              | -1.48            |
| LOC102145495 | ral-GDS-related protein-like                 | 10 29423894 29434758   | 0.183164              | -3.55            | 1.000000              | 1.17             | 0.207200              | 2.91             |
| LOC102121171 |                                              | 1 82231106 82246694    | 0.183622              | -1.66            | 0.039604              | -2.97            | 0.031874              | -2.20            |
| LOC102142103 | pleckstrin homology-like domain family E     | 0 5367 9544            | 0.183737              | 1.55             | 0.955613              | -1.05            | 0.845812              | 1.08             |
| ZSWIM8       | zinc finger SWIM domain-containing prot      | 9 61820272 61836160    | 0.183737              | 1.13             | 0.761883              | -1.06            | 0.556510              | -1.07            |
| SP140        | nuclear body protein SP140 isoform X1        | 12 120040543 120133760 | 0.183748              | 1.53             | 0.913821              | -1.09            | 0.710680              | 1.16             |
| NAB1         | NGFI-A-binding protein 1 isoform X1          | 12 79884311 79923909   | 0.183748              | -1.30            | 0.272298              | 1.42             | 0.631387              | 1.12             |
| NXF3         | nuclear RNA export factor 3 isoform X1       | X 99896992 99942207    | 0.183748              | -1.61            | 0.093516              | -2.50            | 0.194499              | -1.68            |
| FNDC3B       | fibronectin type III domain-containing pro   | 2 76331833 76619234    | 0.183907              | -1.35            | 0.596267              | 1.26             | 0.598312              | 1.16             |
| LOC107129242 |                                              | 3 98785174 98788476    | 0.184033              | 1.64             | 0.615954              | 1.41             | 0.226264              | -1.65            |

| Gene symbol  | Gene name                                    | chr_start_end          | Day3 adjusted P-value | Day3 fold change | Day5 adjusted P-value | Day5 fold change | Day7 adjusted P-value | Day7 fold change |
|--------------|----------------------------------------------|------------------------|-----------------------|------------------|-----------------------|------------------|-----------------------|------------------|
| KLHL6        | kelch-like protein 6 isoform X2              | 2 88167518 88234271    | 0.184082              | 1.29             | 0.741311              | -1.14            | 0.151867              | 1.35             |
| HSD17B6      | 17-beta-hydroxysteroid dehydrogenase ty      | 11 55738957 55754978   | 0.184082              | -1.79            | 0.442809              | -1.79            | 0.825602              | 1.14             |
| LMTK3        | serine/threonine-protein kinase LMTK3        | 19 49312171 49344321   | 0.184156              | 1.59             | 0.211886              | 2.04             | 0.211522              | -1.63            |
| CRISP3       | cysteine-rich secretory protein 3            | 4 120870452 120879107  | 0.184156              | -3.32            | 0.035315              | 14.23            | 0.847301              | 1.26             |
| RNF40        | E3 ubiquitin-protein ligase BRE1B            | 20 29394238 29405855   | 0.184198              | 1.11             | 0.484550              | -1.11            | 0.723632              | -1.04            |
| CCDC154      | coiled-coil domain-containing protein 154    | 20 1457082 1466829     | 0.184228              | 1.97             | 0.359513              | 2.54             | 0.969224              | -1.03            |
| ACER2        | alkaline ceramidase 2 isoform X2             | 15 59293633 59332514   | 0.184228              | 1.29             | 0.047339              | 1.71             | 0.602609              | 1.13             |
| ZNF362       | LOW QUALITY PROTEIN: zinc finger p           | 1 194652478 194681690  | 0.184228              | 1.21             | 0.887889              | 1.05             | 0.975276              | 1.01             |
| LOC102146836 | collagen alpha-1(I) chain                    | 15 2100552 2103486     | 0.184238              | 1.72             | 0.724750              | -1.36            | 0.118738              | -1.97            |
| LOC102121346 | 28S ribosomal protein S36, mitochondrial     | 20 15174322 15175078   | 0.184268              | -1.92            | 0.779474              | -1.30            | 0.384571              | -1.57            |
| ETS2         | protein C-ets-2                              | 3 7947477 7960136      | 0.184425              | 1.29             | 0.061996              | 1.69             | 0.948774              | -1.02            |
| TIMP2        | metalloproteinase inhibitor 2                | 16 76201952 76203946   | 0.184425              | 1.18             | 0.754393              | 1.09             | 0.746097              | 1.05             |
| RAB32        | ras-related protein Rab-32                   | 4 52363385 52377838    | 0.184425              | -1.23            | 0.783474              | -1.10            | 0.586568              | -1.11            |
| NEURL3       | E3 ubiquitin-protein ligase NEURL3           | 13 1248579 1255300     | 0.184504              | -1.53            | 0.859754              | -1.15            | 0.641064              | -1.20            |
| NPC2         | epididymal secretory protein E1              | 7 139163810 139176972  | 0.184673              | -1.27            | 0.004028              | -1.96            | 0.186110              | -1.30            |
| LOC102136791 | transducin-like enhancer protein 4 isoform   | 15 90304904 90459037   | 0.184690              | -1.11            | 0.138742              | 1.21             | 0.053529              | 1.18             |
| ZMYM2        | zinc finger MYM-type protein 2 isoform       | 17 1407310 1501493     | 0.184690              | -1.15            | 0.671579              | 1.09             | 0.741097              | 1.05             |
| CTSG         | cathepsin G                                  | 7 88345448 88348043    | 0.184697              | 2.45             | 0.000107              | 23.20            | 0.681090              | -1.40            |
| CDRT4        | CMT1A duplicated region transcript 4 pro     | 16 15636509 15652382   | 0.184697              | 2.07             | 0.755853              | 1.42             | 0.734069              | -1.27            |
| DUSP4        | dual specificity protein phosphatase 4       | 8 29811622 29824746    | 0.184697              | 1.34             | 0.533309              | 1.29             | 0.741699              | -1.10            |
| RFC1         | replication factor C subunit 1 isoform X3    | 5 38912428 38989882    | 0.184697              | 1.16             | 0.456710              | -1.16            | 0.626128              | 1.07             |
| KCTD1        | BTB/POZ domain-containing protein KC         | 18 55652104 55852338   | 0.184753              | 1.24             | 0.865661              | -1.07            | 0.941665              | 1.02             |
| LOC107130745 |                                              | 9 1372286 1376760      | 0.184833              | 3.46             | 1.000000              | 6.60             | 0.722664              | 1.80             |
| LOC102136843 | uncharacterized protein LOC102136843         | 19 49842594 49844676   | 0.184833              | 2.98             | 0.886381              | -1.35            | 0.460375              | -2.06            |
| LOC102131786 | Ig kappa chain V-I region Walker-like        | 13 18205406 18205907   | 0.184833              | 2.66             | 0.980344              | -1.05            | 0.491856              | 1.81             |
| HPGDS        | hematopoietic prostaglandin D synthase       | 5 93540665 93570425    | 0.184833              | 2.53             | 0.701667              | 1.68             | 0.260408              | 2.19             |
| PRR18        | proline-rich protein 18                      | 4 4453887 4454771      | 0.184833              | 1.88             | 0.848083              | 1.29             | 0.281897              | 1.80             |
| LOC102127445 | putative IQ motif and ankyrin repeat dom     | 8 145370451 145431105  | 0.184833              | 1.85             | 0.440356              | -1.88            | 0.115838              | -2.19            |
| CRY2         | cryptochrome-2                               | 14 21732386 21758524   | 0.184833              | 1.44             | 0.709377              | 1.23             | 0.691497              | -1.15            |
| CMIP         | C-Maf-inducing protein isoform X1            | 20 69711135 69976246   | 0.184833              | 1.35             | 0.827275              | -1.12            | 0.766844              | 1.09             |
| EDNRA        | endothelin-1 receptor isoform X1             | 5 146639631 146696237  | 0.184833              | 1.26             | 0.319354              | 1.34             | 0.083435              | 1.37             |
| KIAA0040     | uncharacterized protein KIAA0040 homo        | 1 33125522 33125818    | 0.184833              | 1.26             | 0.329105              | 1.33             | 0.388818              | 1.19             |
| DHX32        | putative pre-mRNA-splicing factor ATP-c      | 9 125164487 125205164  | 0.184833              | -1.11            | 0.018714              | -1.28            | 0.009300              | -1.21            |
| APOOL        | MICOS complex subunit MIC27 isoform          | X 82122799 82204028    | 0.184833              | -1.18            | 0.775113              | 1.08             | 0.888348              | -1.02            |
| NCR1         | natural cytotoxicity triggering receptor 1 i | 19 55692041 55698411   | 0.185295              | 1.40             | 0.829475              | -1.15            | 0.106474              | 1.58             |
| YTHDF2       |                                              | 1 199350622 199402820  | 0.185325              | -1.16            | 0.869576              | 1.04             | 0.985794              | 1.00             |
| KANK3        | KN motif and ankyrin repeat domain-cont      | 19 8670473 8688392     | 0.185418              | -1.46            | 0.312996              | 1.62             | 0.392606              | -1.33            |
| ZBTB40       | zinc finger and BTB domain-containing p      | 1 205909993 205946700  | 0.185477              | 1.14             | 0.846842              | -1.05            | 0.310932              | -1.12            |
| SNTB1        | beta-1-syntrophin                            | 8 121818874 122093902  | 0.185477              | -1.18            | 0.054554              | 1.42             | 0.122339              | 1.23             |
| USP15        | ubiquitin carboxyl-terminal hydrolase 15     | 11 61430288 61576715   | 0.185477              | -1.20            | 0.875846              | -1.05            | 0.985210              | -1.10            |
| FBLN5        | fibulin-5 isoform X2                         | 7 156842168 156920736  | 0.185551              | 1.54             | 0.410375              | 1.59             | 0.762905              | -1.03            |
| LOC102138996 | HLA class I histocompatibility antigen, B    | 4 139500651 139503258  | 0.185601              | -1.58            | 0.383632              | -1.68            | 0.003266              | 2.57             |
| CCNF         | cyclin-F                                     | 20 2520435 2552062     | 0.185750              | -1.59            | 0.171504              | -2.12            | 0.965046              | -1.02            |
| LECT1        | leukocyte cell-derived chemotaxin 1 isofo    | 17 32041936 32077788   | 0.185827              | 4.65             | 1.000000              | -1.06            | 1.000000              | -1.99            |
| ZNF594       | LOW QUALITY PROTEIN: zinc finger p           | 16 5186746 5189973     | 0.185944              | 1.52             | 0.007677              | 3.49             | 0.052417              | 1.94             |
| RAPGEF5      | rap guanine nucleotide exchange factor 5     | 3 98416737 98411994    | 0.185944              | 1.31             | 0.028631              | 1.87             | 0.562497              | 1.15             |
| LOC107128971 |                                              | 2 140366361 140375795  | 0.185944              | -1.35            | 0.837369              | 1.11             | 0.301802              | -1.30            |
| CHIC1        | cysteine-rich hydrophobic domain-contair     | X 70812581 70927169    | 0.185944              | -1.62            | 0.097252              | 2.48             | 0.518979              | 1.32             |
| LOC107127999 |                                              | 17 57948488 57955286   | 0.185944              | -2.15            | 0.753793              | 1.57             | 0.539920              | 1.66             |
| SLC16A9      | monocarboxylate transporter 9                | 9 76402254 76435018    | 0.185998              | 1.58             | 0.777541              | 1.23             | 0.855185              | -1.09            |
| GBP7         | guanylate-binding protein 7                  | 1 138057508 138102716  | 0.185998              | -2.30            | 0.966616              | 1.10             | 0.420401              | 2.04             |
| LOC102128794 | endogenous retrovirus group V member 1       | 19 53776160 53777794   | 0.185998              | -3.89            | 0.146297              | -6.11            | 0.014061              | 15.09            |
| SYNE2        | nesprin-2 isoform X1                         | 7 128265668 128585629  | 0.186077              | 1.31             | 0.947107              | -1.04            | 0.977740              | -1.01            |
| ZSCAN25      | zinc finger and SCAN domain-containing       | 3 43886797 43896774    | 0.186077              | 1.12             | 0.442546              | 1.12             | 0.618486              | 1.80             |
| LOC102125820 |                                              | 10 23542000 23606598   | 0.186077              | -1.17            | 0.631084              | 1.12             | 0.731268              | 1.05             |
| TDG          | G/T mismatch-specific thymine DNA gly        | 11 107651790 107672451 | 0.186172              | -1.32            | 0.991575              | -1.01            | 0.834287              | 1.06             |
| DSP          | desmoplakin isoform X2                       | 4 163380166 163425081  | 0.186349              | 1.54             | 0.005415              | 3.31             | 0.030771              | -2.03            |
| LOC107129302 |                                              | 3 175324244 175339481  | 0.186459              | 5.95             | 1.000000              | -2.07            | 1.000000              | 2.72             |
| ENKUR        | uncharacterized protein LOC101865858         | 9 25501175 25516114    | 0.186585              | 3.49             | 0.186213              | -13.58           | 0.922213              | 1.15             |
| ARMCX5       | armadillo repeat-containing X-linked prot    | X 99472788 99474464    | 0.186659              | -1.18            | 0.712187              | -1.10            | 0.377776              | 1.14             |
| CLCF1        | cardiotrophin-like cytokine factor 1         | 14 7081481 7090709     | 0.186659              | -1.62            | 0.859914              | -1.16            | 0.336072              | -1.48            |
| EDC4         | enhancer of mRNA-decapping protein 4 iso     | 20 56079613 56091298   | 0.186681              | 1.12             | 0.310316              | -1.15            | 0.326224              | -1.10            |
| KLF3         | Krueppel-like factor 3 isoform X1            | 5 38317568 38335134    | 0.186681              | -1.27            | 0.021165              | 1.80             | 0.314543              | 1.23             |
| BTBD6        | BTB/POZ domain-containing protein 6          | 7 170614352 170615854  | 0.186756              | -1.24            | 0.692301              | 1.14             | 0.015500              | -1.46            |
| LSM3         | U6 snRNA-associated Sm-like protein LS       | 11 86176403 86195232   | 0.186859              | -1.13            | 0.816295              | 1.05             | 0.811482              | -1.03            |
| LOC107129271 |                                              | 3 137396922 137429398  | 0.186859              | -1.42            | 0.886150              | -1.10            | 0.666172              | -1.15            |
| SLC34A2      | sodium-dependent phosphate transport pro     | 5 24871520 24886142    | 0.187008              | 1.27             | 0.055752              | -1.66            | 0.247106              | -1.27            |
| CTSW         | cathepsin W isoform X2                       | 14 8630468 8634541     | 0.187211              | 1.38             | 0.074911              | -1.86            | 0.000871              | 2.04             |
| SH3PXD2A     | SH3 and PX domain-containing protein 2       | 9 102671209 102921955  | 0.187531              | 1.28             | 0.791453              | -1.11            | 0.266282              | 1.26             |
| LOC102136378 |                                              | 15 19544242 19643341   | 0.187596              | 1.71             | 0.970213              | -1.05            | 0.880834              | 1.09             |
| LOC102130278 | LOW QUALITY PROTEIN: arachidonate            | 16 6681096 6684729     | 0.187608              | 1.79             | 0.712945              | -1.40            | 0.416222              | -1.52            |
| SLC29A4      | equilibrative nucleoside transporter 4 isofo | 3 40818284 40834489    | 0.187614              | 1.58             | 0.664154              | -1.35            | 0.925941              | 1.04             |
| KLF7         | Krueppel-like factor 7 isoform X2            | 12 96676780 96761802   | 0.187614              | 1.17             | 0.038968              | 1.42             | 0.990086              | -1.00            |
| LOC107130695 |                                              | 8 130679603 130716610  | 0.187670              | 4.82             | 1.000000              | 1.87             | 0.747236              | 1.55             |
| LOC102142392 |                                              | 1 227507174 227514066  | 0.187720              | 1.88             | 0.931788              | -1.11            | 0.392606              | -1.61            |
| DEPDC7       | DEP domain-containing protein 7 isoform      | 14 34410582 34427930   | 0.187720              | -1.42            | 0.289491              | 1.59             | 0.984477              | -1.01            |
| HSD17B12     | very-long-chain 3-oxoacyl-CoA reductase      | 14 23740027 23909399   | 0.188108              | -1.28            | 0.261426              | 1.41             | 0.516428              | 1.16             |
| PSMG4        | proteasome assembly chaperone 4 isoform      | 4 167804605 167833452  | 0.188255              | -1.23            | 0.530134              | 1.20             | 0.651836              | -1.09            |
| C14H1orf88   | UPF0722 protein C1orf88 homolog isofo        | 14 107476244 107501236 | 0.188337              | 5.23             | 0.951651              | 1.24             | 0.665168              | -1.97            |
| LOC102124469 |                                              | 13 81685248 81704179   | 0.188337              | 3.19             | 1.000000              | -4.29            | 0.287609              | -3.81            |
| ZNF396       | LOW QUALITY PROTEIN: zinc finger p           | 18 46619617 46624350   | 0.188337              | 1.91             | 0.596555              | -1.67            | 0.403142              | 1.66             |
| BIRC5        | baculoviral IAP repeat containing 5          | 16 75592523 75604001   | 0.188337              | -1.57            | 0.419429              | -1.61            | 0.641064              | 1.22             |
| GAS2L3       | GAS2-like protein 3 isoform X2               | 11 104371961 104402805 | 0.188337              | -1.61            | 0.756266              | -1.26            | 0.809741              | 1.12             |
| DEPDC1       | DEP domain-containing protein 1A isoform     | 1 158828116 158848840  | 0.188337              | -1.86            | 0.631920              | -1.54            | 0.310155              | 1.72             |
| LOC102125614 | coiled-coil-helix-coiled-coil-helix domain   | 12 11086945 11087400   | 0.188337              | -2.53            | 0.883662              | -1.27            | 0.975530              | 1.03             |
| YWHAQ        | 14-3-3 protein gamma                         | 3 47093128 47123556    | 0.188377              | -1.35            | 0.828139              | 1.12             | 0.935508              | 1.03             |
| WBSCR17      | putative polypeptide N-acetylgalactosami     | 3 53565009 54189148    | 0.188406              | 1.82             | 0.183929              | 2.63             | 0.961943              | 1.03             |



| Gene symbol  | Gene name                                   | chr_start_end          | Day3 adjusted P-value | Day3 fold change | Day5 adjusted P-value | Day5 fold change | Day7 adjusted P-value | Day7 fold change |
|--------------|---------------------------------------------|------------------------|-----------------------|------------------|-----------------------|------------------|-----------------------|------------------|
| LOC107128563 |                                             | X 75055670 75073084    | 0.188406              | 1.71             | 0.816917              | 1.23             | 0.911912              | -1.06            |
| CCNJ         | cyclin-J isoform X1                         | 9 94710381 94724374    | 0.188406              | -1.30            | 0.657995              | 1.19             | 0.289481              | 1.27             |
| LOC102141746 | calcium-binding mitochondrial carrier pro   | 1 118553496 118623061  | 0.188406              | -1.87            | 0.837510              | -1.25            | 0.563120              | -1.41            |
| FANCF        | Fanconi anemia group F protein              | 14 44976012 44977136   | 0.188652              | -1.19            | 0.738605              | -1.10            | 0.028883              | 1.34             |
| ABCC9        | ATP-binding cassette sub-family C memb      | 11 22510348 22643890   | 0.188654              | 1.46             | 0.816518              | -1.16            | 0.081808              | 1.68             |
| CHD9         | chromodomain-helicase-DNA-binding pro       | 20 41006081 41177361   | 0.188654              | -1.22            | 0.377598              | 1.25             | 0.092702              | 1.30             |
| PPIE         | uncharacterized protein LOC101926324        | 1 188017985 188033272  | 0.188746              | 1.18             | 0.149512              | -1.32            | 0.130061              | -1.22            |
| LOC102146295 |                                             | 4 95030378 95110959    | 0.188784              | 1.32             | 0.764744              | 1.14             | 0.918273              | 1.03             |
| SLC9A1       | sodium/hydrogen exchanger 1 isoform X1      | 1 201107389 201165546  | 0.188978              | 1.15             | 0.841277              | 1.05             | 0.041487              | -1.25            |
| KAT5         | histone acetyltransferase KAT5 isoform X    | 14 87655048 8774129    | 0.189053              | 1.12             | 0.477454              | -1.12            | 0.827627              | -1.03            |
| IRX5         | iroquois-class homeodomain protein IRX      | 20 42797509 42800299   | 0.189053              | -1.36            | 0.652908              | -1.23            | 0.709969              | 1.11             |
| NIPAL3       | uncharacterized protein LOC101925184        | 1 203892117 203941234  | 0.189191              | 1.32             | 0.925158              | 1.05             | 0.957256              | -1.02            |
| LOC102141485 | 40S ribosomal protein SA-like               | 7 48177893 48178780    | 0.189528              | 1.30             | 0.777693              | 1.13             | 0.372758              | -1.23            |
| IGSF8        | immunoglobulin superfamily member 8         | 1 91567937 91574569    | 0.189528              | 1.20             | 0.499887              | -1.18            | 0.061206              | -1.30            |
| ATG4A        | cysteine protease ATG4A isoform X1          | X 105195657 105272066  | 0.189528              | -1.12            | 0.786325              | 1.05             | 0.959604              | -1.09            |
| ZDHHC2       | palmitoyltransferase ZDHHC2 isoform X       | 8 17143158 17205756    | 0.189528              | -1.28            | 0.029284              | 1.78             | 0.957701              | -1.02            |
| GABARAPL1    | gamma-aminobutyric acid receptor-associ     | 11 10554723 10564473   | 0.189569              | 1.26             | 0.675913              | 1.16             | 0.346199              | -1.21            |
| GPR182       | G-protein coupled receptor 182              | 11 55946752 55947966   | 0.189672              | 1.61             | 0.161342              | 2.21             | 0.695505              | 1.20             |
| SORL1        | sortilin-related receptor isoform X2        | 14 117495446 117672139 | 0.189672              | 1.50             | 0.875846              | -1.12            | 0.332528              | 1.41             |
| SLC28A3      | solute carrier family 28 member 3 isoform   | 15 95095244 95157375   | 0.189688              | -1.84            | 0.960153              | -1.07            | 0.288667              | -1.74            |
| CRLS1        | cardiolipin synthase (CMP-forming) isofo    | 10 56455297 56488107   | 0.189697              | -1.19            | 0.465402              | 1.18             | 0.578897              | -1.09            |
| EFCAB1       | EF-hand calcium-binding domain-contain      | 8 49598279 49608294    | 0.189742              | 3.94             | 0.719899              | -2.43            | 0.348829              | -3.23            |
| LOC102142553 |                                             | 1 116832210 116860683  | 0.190352              | -3.45            | 1.000000              | -2.15            | 0.871877              | 1.24             |
| G3BP1        | ras GTPase-activating protein-binding pro   | 6 151114289 151132242  | 0.190410              | -1.35            | 0.552627              | 1.29             | 0.478035              | 1.21             |
| RGS3         | regulator of G-protein signaling 3 isoform  | 15 23981910 24119484   | 0.190415              | 1.17             | 0.359479              | -1.21            | 0.541824              | 1.09             |
| CBR4         | carbonyl reductase family member 4 isofo    | 5 168168958 168257040  | 0.190518              | -1.21            | 0.236399              | -1.31            | 0.568664              | -1.10            |
| THAP9        | DNA topoisomerase THAP9 isoform X1          | 5 51506904 51525725    | 0.190518              | -1.22            | 0.969463              | -1.02            | 0.395345              | 1.16             |
| LOC102116690 | disintegrin and metalloproteinase domain-   | 7 135172351 135198105  | 0.190671              | -1.12            | 0.945926              | -1.02            | 0.300133              | -1.11            |
| LOC102135027 | phyloquinone omega-hydroxylase CYP4         | 19 16173259 16223048   | 0.190851              | 2.47             | 0.150662              | -7.75            | 0.657542              | 1.45             |
| RYR1         | ryanodine receptor 1                        | 19 38892018 39047010   | 0.190851              | 1.48             | 0.620138              | 1.35             | 0.747236              | 1.13             |
| RNF14        | E3 ubiquitin-protein ligase RNF14 isoform   | 6 141134572 141149870  | 0.190851              | -1.28            | 0.393299              | 1.31             | 0.309397              | 1.24             |
| LOC107129254 |                                             | 3 113375769 113384119  | 0.190851              | -1.54            | 0.712187              | 1.31             | 0.801281              | -1.12            |
| INPP4B       | type II inositol 3,4-bisphosphate 4-phosph  | 5 141381081 141777952  | 0.191496              | 1.35             | 0.859754              | -1.10            | 0.353358              | 1.27             |
| LOC107130951 | Ig lambda chain V region 4A-like            | 10 29260049 29260526   | 0.191512              | 1.79             | 0.000000              | 27.88            | 0.039165              | 2.18             |
| SLC40A1      | solute carrier family 40 member 1 isoform   | 12 78728655 78746744   | 0.191535              | 1.28             | 0.746785              | 1.14             | 0.152729              | 1.34             |
| NTN4         | netrin-4 isoform X1                         | 11 99364813 99490891   | 0.191635              | 1.32             | 0.763957              | 1.14             | 0.596227              | -1.15            |
| ZNF77        | zinc finger protein 77                      | 19 2886285 2900071     | 0.191796              | 1.19             | 0.841771              | 1.06             | 0.734809              | -1.06            |
| HOXB2        | homeobox protein Hox-B2                     | 16 33896681 33898549   | 0.191796              | -1.31            | 0.335826              | 1.39             | 0.360228              | 1.24             |
| TPST1        | protein-tyrosine sulfotransferase 1 isoform | 3 55899015 56027036    | 0.191847              | -1.30            | 0.129644              | -1.59            | 0.263957              | 1.28             |
| GALNTL5      | inactive polypeptide N-acetylgalactosamin   | 3 184675028 184730749  | 0.192506              | -2.44            | 0.981826              | -1.07            | 0.746058              | -1.44            |
| LOC102132877 |                                             | 19 36660238 36673181   | 0.192655              | 1.56             | 0.972873              | -1.04            | 0.917769              | 1.05             |
| SORBS3       | vinexin isoform X1                          | 8 22714272 22741387    | 0.192831              | 1.20             | 0.880087              | 1.05             | 0.403142              | -1.14            |
| PPP1R12A     | protein phosphatase 1 regulatory subunit 1  | 11 78969445 79130702   | 0.192837              | -1.24            | 0.164527              | 1.43             | 0.474043              | 1.15             |
| LOC101866649 | disintegrin and metalloproteinase domain-   | 8 40492533 40650151    | 0.193013              | -6.44            | 1.000000              | 10.26            | 0.577221              | 2.18             |
| TSPAN1       | tetraspanin-1 isoform X1                    | 1 181310457 181314951  | 0.193176              | 1.39             | 0.328141              | -1.51            | 0.025709              | -1.74            |
| FGF11        | fibroblast growth factor 11                 | 16 7499444 7502996     | 0.193287              | -1.65            | 0.284323              | -1.97            | 0.263188              | 1.60             |
| SPC25        | kinetochore protein Spc25                   | 12 57752018 57770514   | 0.193380              | -1.69            | 0.597348              | -1.49            | 0.536393              | 1.35             |
| RIC8A        | synembyrn-A                                 | 14 20085 25632         | 0.193417              | 1.16             | 0.521372              | -1.14            | 0.491021              | -1.10            |
| PDE6H        | retinal cone rhodopsin-sensitive cGMP 3'    | 11 15608439 15612190   | 0.193856              | 1.52             | 0.942662              | -1.07            | 0.644254              | 1.21             |
| TM2D3        | TM2 domain-containing protein 3 isoform     | 7 82614165 82623686    | 0.194059              | -1.12            | 0.417846              | 1.14             | 0.125047              | -1.16            |
| LOC107126872 | uncharacterized protein LOC107126872        | 12 22533728 22534309   | 0.194236              | 1.47             | 0.581408              | -1.37            | 0.857304              | -1.08            |
| ZNF584       | zinc finger protein 584 isoform X1          | 19 59010109 59018125   | 0.194236              | 1.40             | 0.882501              | 1.10             | 0.791805              | -1.09            |
| RNF114       | uncharacterized protein LOC101865790        | 10 81717549 81732814   | 0.194236              | 1.13             | 0.831014              | 1.05             | 0.067104              | 1.20             |
| SCYL1        | N-terminal kinase-like protein isoform X3   | 14 8952620 8967247     | 0.194236              | 1.12             | 0.195889              | -1.19            | 0.217201              | -1.12            |
| UMPS         | uridine 5'-monophosphate synthase           | 2 147384005 147398076  | 0.194236              | -1.16            | 0.885024              | -1.04            | 0.967163              | 1.01             |
| LOC107129559 |                                             | 4 133347585 133370314  | 0.194236              | -1.38            | 0.989138              | -1.01            | 0.027619              | -1.73            |
| SOCS2        | suppressor of cytokine signaling 2          | 11 97259382 97261655   | 0.194236              | -1.43            | 0.685075              | 1.25             | 0.086944              | -1.63            |
| LOC107127575 | uncharacterized protein LOC107127575 i      | 1 182024588 182028058  | 0.194236              | -1.48            | 0.025396              | -2.53            | 0.085517              | 1.72             |
| C15H9orf64   | UPF0553 protein C9orf64 homolog             | 15 94750779 94766498   | 0.194283              | 1.22             | 0.753862              | -1.11            | 0.158093              | 1.26             |
| GCGR         | glucagon receptor isoform X1                | 16 79401163 79405514   | 0.194418              | 1.78             | 0.993059              | -1.01            | 0.951616              | 1.04             |
| LOC102143756 | cytochrome c oxidase subunit 6B1            | 19 36108438 36115905   | 0.194436              | -1.18            | 0.240493              | -1.28            | 0.308842              | -1.16            |
| LOC102142765 |                                             | 7 133196587 133209160  | 0.194436              | -2.15            | 0.781775              | -1.47            | 0.217427              | 2.08             |
| HIRIP3       | HIRA-interacting protein 3 isoform X2       | 20 28478660 28481047   | 0.194486              | 1.17             | 0.915207              | -1.03            | 0.754426              | -1.05            |
| BCL2         | apoptosis regulator Bcl-2                   | 18 17014769 17213048   | 0.194678              | 1.21             | 0.886039              | 1.05             | 0.239558              | 1.22             |
| EMC1         | ER membrane protein complex subunit 1       | 1 209184061 209212632  | 0.194800              | 1.35             | 0.817766              | 1.13             | 0.316926              | 1.30             |
| SLC38A10     | putative sodium-coupled neutral amino ac    | 16 78857381 78909189   | 0.194817              | 1.10             | 0.330825              | -1.12            | 0.573876              | 1.05             |
| TSC22D2      | TSC22 domain family protein 2 isoform X     | 2 52646251 52696328    | 0.194885              | -1.25            | 0.148746              | 1.48             | 0.344161              | 1.21             |
| LOC102134257 |                                             | 16 15293010 15303525   | 0.194945              | 2.85             | 0.992072              | 1.02             | 0.559082              | 1.77             |
| MYCL         | protein L-Myc isoform X1                    | 1 187873455 187878742  | 0.194945              | 1.34             | 0.848538              | 1.11             | 0.937792              | -1.03            |
| LOC102140322 | membrane primary amine oxidase isoform      | 16 54605992 54620105   | 0.194945              | 1.25             | 0.096847              | 1.53             | 0.180038              | 1.29             |
| MKRN1        | E3 ubiquitin-protein ligase makorin-1 iso   | 3 173476179 173488215  | 0.194945              | 1.12             | 0.639478              | -1.08            | 0.944041              | -1.01            |
| RPS29        | 40S ribosomal protein S29                   | 7 113764815 113767461  | 0.194945              | -1.20            | 0.834216              | -1.07            | 0.395688              | -1.15            |
| ACRBP        | acrosin-binding protein                     | 11 6931465 6941197     | 0.194945              | -1.51            | 0.869401              | -1.13            | 0.658590              | -1.19            |
| BPTF         | nucleosome-remodeling factor subunit BP     | 16 65049531 65200654   | 0.194975              | 1.18             | 0.933568              | -1.03            | 0.298240              | 1.16             |
| ENKD1        | enkurin domain-containing protein 1         | 20 55845771 55849645   | 0.194997              | 1.39             | 0.505304              | -1.36            | 0.016451              | -1.82            |
| ZNF627       | zinc finger protein 627                     | 19 11951939 11976792   | 0.195115              | 1.15             | 0.693459              | 1.09             | 0.237031              | 1.15             |
| RAB3GAP2     | rab3 GTPase-activating protein non-cataly   | 1 78888786 79009604    | 0.195173              | -1.14            | 0.300354              | 1.19             | 0.285351              | 1.13             |
| PTPRT        | receptor-type tyrosine-protein phosphatase  | 10 73726533 74881662   | 0.195289              | 1.59             | 0.567865              | 1.44             | 0.533874              | 1.29             |
| LOC102125303 | supervillin isoform X1                      | 9 29972280 30132764    | 0.195289              | 1.34             | 0.319906              | 1.45             | 0.817276              | -1.07            |
| PEX2         | peroxisome biogenesis factor 2              | 8 78151054 78153635    | 0.195289              | -1.13            | 0.655492              | -1.09            | 0.574223              | 1.07             |
| TREML1       | trem-like transcript 1 protein isoform X1   | 4 129541001 129545704  | 0.195289              | -1.56            | 0.933024              | -1.08            | 0.533592              | -1.29            |
| SLC9A7       | sodium/hydrogen exchanger 7 isoform X2      | X 45016143 45161066    | 0.195435              | 1.27             | 0.556766              | -1.22            | 0.220665              | 1.29             |
| SMO          | smoothened homolog isoform X2               | 3 161842713 161866667  | 0.195435              | 1.24             | 0.932126              | -1.04            | 0.366576              | 1.18             |
| RRP9         | U3 small nucleolar RNA-interacting prote    | 2 107187687 107196570  | 0.195435              | -1.18            | 0.182587              | 1.32             | 0.716275              | 1.06             |
| LOC102119046 |                                             | 9 116481538 116487247  | 0.195435              | -1.85            | 0.909241              | 1.14             | 0.484771              | -1.50            |
| CTDP1        | RNA polymerase II subunit A C-terminal      | 18 523892 599083       | 0.195436              | 1.12             | 0.675495              | -1.08            | 0.825678              | 1.03             |
| SBK1         | serine/threonine-protein kinase SBK1        | 20 27204096 27277364   | 0.195529              | 1.57             | 0.444623              | -1.59            | 0.464788              | 1.33             |

| Gene symbol  | Gene name                                   | chr_start_end          | Day3 adjusted P-value | Day3 fold change | Day5 adjusted P-value | Day5 fold change | Day7 adjusted P-value | Day7 fold change |
|--------------|---------------------------------------------|------------------------|-----------------------|------------------|-----------------------|------------------|-----------------------|------------------|
| TSTD1        | thiosulfate sulfurtransferase/rhodanese-lik | 1 90617202 90618380    | 0.195531              | 1.46             | 0.915908              | -1.08            | 0.407797              | -1.32            |
| LOC102137203 |                                             | 3 131504232 131535104  | 0.195531              | -2.76            | 0.439229              | -3.91            | 0.263970              | -2.78            |
| GALNT7       | N-acetylgalactosaminyltransferase 7 isofo   | 5 172399751 172551624  | 0.195544              | -1.30            | 0.948945              | -1.04            | 0.692874              | 1.11             |
| C1GALT1      | glycoprotein-N-acetylgalactosamine 3-bet    | 3 113858146 113945793  | 0.195604              | -1.59            | 0.619331              | 1.40             | 0.801507              | 1.13             |
| CRTC3        | CREB-regulated transcription coactivator    | 7 70920996 71035075    | 0.195740              | 1.10             | 0.781775              | 1.04             | 0.953862              | -1.01            |
| C13H2orf48   | LOW QUALITY PROTEIN: uncharacteri           | 13 100763610 100841337 | 0.195825              | -1.62            | 0.712257              | 1.30             | 0.056380              | -2.05            |
| LRRC73       | leucine-rich repeat-containing protein 73   | 4 127049417 127051963  | 0.195871              | 1.58             | 0.889605              | -1.13            | 0.261345              | -1.56            |
| SPTBN1       | spectrin beta chain, non-erythrocytic 1 iso | 13 55397413 55542014   | 0.195923              | 1.34             | 0.228448              | 1.54             | 0.751424              | 1.09             |
| LOC102120146 |                                             | 6 151228470 151248062  | 0.196227              | -2.31            | 0.896310              | 1.25             | 0.181691              | -3.30            |
| USP51        | ubiquitin carboxyl-terminal hydrolase 51    | 0 3590 5947            | 0.196281              | 1.32             | 0.599498              | -1.23            | 0.479872              | 1.19             |
| OST4         | dolichyl-diphosphooligosaccharide--prote    | 13 83805596 83805709   | 0.196324              | -1.22            | 0.613489              | -1.16            | 0.968056              | 1.01             |
| DCAF5        | DDB1- and CUL4-associated factor 5 iso      | 7 133592417 133698530  | 0.196329              | 1.13             | 0.386907              | -1.15            | 0.257041              | -1.12            |
| PNN          | pinin                                       | 7 103162275 103168788  | 0.196329              | -1.16            | 0.843317              | 1.05             | 0.424357              | -1.11            |
| LOC102121743 | aldo-keto reductase family 1 member B10     | 3 167464604 167477234  | 0.196330              | -1.66            | 0.550920              | -1.50            | 0.053427              | -1.93            |
| PBK          | lymphokine-activated killer T-cell-origina  | 8 28258502 28275994    | 0.196330              | -1.85            | 0.807442              | -1.29            | 0.722327              | 1.23             |
| TMEM155      | protein TMEM155 isoform X2                  | 5 120732398 120735935  | 0.196360              | 1.81             | 0.064849              | 3.47             | 0.464491              | 1.47             |
| PSMD7        | 26S proteasome non-ATPase regulatory s      | 20 58278485 58286806   | 0.196383              | -1.14            | 0.911281              | -1.03            | 0.740794              | -1.04            |
| SMARCAD1     | SWI/SNF-related matrix-associated actin-    | 5 93454604 93536065    | 0.196518              | -1.27            | 0.751805              | 1.13             | 0.419921              | 1.19             |
| ANAPC4       | anaphase-promoting complex subunit 4 is     | 5 24571634 24612746    | 0.196778              | -1.15            | 0.760138              | 1.07             | 0.940615              | 1.01             |
| ATP13A3      | probable cation-transporting ATPase 13A     | 2 3066342 3125060      | 0.196778              | -1.56            | 0.915878              | 1.10             | 0.952706              | 1.03             |
| IQUB         | IQ and ubiquitin-like domain-containing p   | 3 156256185 156317111  | 0.196780              | 1.25             | 0.675495              | -1.15            | 0.979515              | -1.01            |
| CAMK2G       | calcium/calmodulin-dependent protein kin    | 9 61745245 61805684    | 0.196793              | 1.27             | 0.623971              | 1.19             | 0.800915              | 1.06             |
| ZFP30        | zinc finger protein 30 homolog isoform X    | 19 38045834 38059696   | 0.196793              | -1.31            | 0.966632              | -1.03            | 0.723789              | -1.10            |
| DDX11        | probable ATP-dependent RNA helicase D       | 11 9745339 9775077     | 0.196793              | -1.34            | 0.114284              | -1.71            | 0.751155              | 1.10             |
| MAATS1       | protein MAATS1                              | 2 152433855 152479311  | 0.196849              | 1.80             | 0.321793              | 2.41             | 0.479109              | -1.53            |
| LOC102130691 |                                             | 1 132105830 132257363  | 0.196849              | -1.54            | 0.132715              | -2.08            | 0.439516              | -1.32            |
| LOC102117020 | uncharacterized protein LOC102117020        | 4 142932981 142974946  | 0.196930              | -1.40            | 0.573361              | -1.29            | 0.672648              | -1.14            |
| RBM47        | RNA-binding protein 47 isoform X3           | 5 40134935 40147486    | 0.197070              | -1.18            | 0.266220              | -1.26            | 0.293822              | -1.17            |
| LOC102146102 | myosin-8                                    | 16 10564366 10594198   | 0.197098              | 3.66             | 0.889523              | 1.24             | 0.113601              | -2.94            |
| VPREB3       | pre-B lymphocyte protein 3                  | 0 185575 187068        | 0.197098              | 2.42             | 0.675303              | -1.83            | 0.817924              | 1.24             |
| LOC102129925 | LOW QUALITY PROTEIN: heat shock c           | 3 26339939 26342170    | 0.197098              | 2.30             | 0.971551              | -1.06            | 0.620711              | -1.42            |
| MUTYH        | A/G-specific adenine DNA glycosylase is     | 1 182191511 182203697  | 0.197098              | 1.31             | 0.884567              | 1.08             | 0.725799              | -1.10            |
| LOC102121276 |                                             | 0 7 2308               | 0.197098              | 1.29             | 0.223426              | -1.48            | 0.366096              | -1.22            |
| HSD11B2      | corticosteroid 11-beta-dehydrogenase iso    | 20 55588228 55595660   | 0.197098              | -1.60            | 0.030466              | 3.03             | 0.657718              | -1.22            |
| HEPACAM      | hepatocyte cell adhesion molecule isoform   | 14 120710175 120724740 | 0.197180              | 2.46             | 0.354857              | 3.22             | 0.642964              | -1.47            |
| GSTA3        | glutathione S-transferase alpha 3           | 4 117826367 117834191  | 0.197192              | 1.86             | 0.131806              | -3.03            | 0.885010              | 1.10             |
| SF3B2        | splicing factor 3B subunit 2 isoform X4     | 14 8430760 8448243     | 0.197192              | 1.13             | 0.649812              | -1.09            | 0.700377              | 1.05             |
| LOC101866390 | uncharacterized protein LOC101866390        | 3 64238757 64243619    | 0.197192              | -1.15            | 0.329312              | 1.20             | 0.855596              | 1.03             |
| CFAP161      | uncharacterized protein C15orf26 homolo     | 7 59637709 59651512    | 0.197362              | 5.64             | 0.593839              | 5.23             | 0.634038              | -2.19            |
| CD1A         | T-cell surface glycoprotein CD1a isoform    | 0 44118 59272          | 0.197365              | 2.08             | 0.136482              | 3.73             | 0.713543              | -1.30            |
| SMCO2        | single-pass membrane and coiled-coil dor    | 11 28154662 28188338   | 0.197418              | -1.64            | 0.073984              | -2.70            | 0.321587              | -1.54            |
| LOC102141107 |                                             | 17 2509935 2519159     | 0.197525              | 4.57             | 1.000000              | 1.88             | 1.000000              | -1.68            |
| LOC102131138 |                                             | 14 8121639 8157294     | 0.197560              | 2.82             | 0.972407              | -1.07            | 0.427272              | -1.90            |
| CHRNA2       | neuronal acetylcholine receptor subunit al  | 8 27903115 27912940    | 0.197560              | 1.77             | 0.005487              | -4.70            | 0.107014              | -2.08            |
| LOC102138258 | LOW QUALITY PROTEIN: fructose-bis           | X 70763829 70764924    | 0.197560              | -2.24            | 0.004275              | -10.33           | 0.217202              | -2.34            |
| C7H14orf166  | UPF0568 protein C14orf166 homolog           | 7 116169240 116183966  | 0.197826              | -1.17            | 0.649211              | -1.11            | 0.622637              | 1.07             |
| FAM216A      | protein FAM216A                             | 11 114076497 114098413 | 0.197869              | -1.30            | 0.862552              | 1.09             | 0.930928              | 1.03             |
| FOXN3        | forkhead box protein N3 isoform X8          | 7 154093025 154347607  | 0.197962              | 1.22             | 0.878397              | 1.06             | 0.309093              | 1.20             |
| PIK3CD       | phosphatidylinositol 4,5-bisphosphate 3-ki  | 1 218514794 218532450  | 0.198053              | 1.23             | 0.320123              | -1.31            | 0.159864              | 1.28             |
| TKTL1        | transketolase-like protein 1                | X 151194217 151226204  | 0.198090              | -1.79            | 0.256246              | 2.34             | 0.502621              | -1.43            |
| WFDC1        | WAP four-disulfide core domain protein      | 20 72577932 72622557   | 0.198382              | 1.71             | 0.242173              | 2.20             | 0.678291              | -1.24            |
| RHBDF2       | inactive rhomboid protein 2                 | 16 73852591 73862837   | 0.198382              | -1.34            | 0.537855              | -1.29            | 0.817975              | 1.07             |
| MFS1         | major facilitator superfamily domain-cont   | 2 61153701 61178129    | 0.198382              | -1.39            | 0.779882              | -1.17            | 0.841493              | 1.07             |
| ACSS1        | acetyl-coenzyme A synthetase 2-like, mito   | 10 37289486 37350380   | 0.198524              | 1.36             | 0.480212              | -1.34            | 0.549458              | -1.18            |
| LOC107130132 |                                             | 6 180844153 180853318  | 0.198524              | -1.62            | 0.550383              | 1.54             | 0.304877              | 1.63             |
| ISPD         | isoprenoid synthase domain-containing pr    | 3 104320409 104658532  | 0.198578              | -1.38            | 0.974729              | 1.02             | 0.982174              | -1.01            |
| LOC102120328 | CD209 antigen-like protein 2 isoform X2     | 19 8082970 8088889     | 0.198611              | -1.73            | 0.432015              | -1.79            | 0.641584              | 1.26             |
| MAP2K6       | uncharacterized protein LOC101925060        | 16 66559760 66697340   | 0.198683              | 1.30             | 0.279838              | -1.43            | 0.467419              | 1.19             |
| MBTPS1       | membrane-bound transcription factor site-   | 20 72331430 72381591   | 0.198944              | 1.13             | 0.435963              | -1.13            | 0.083435              | 1.18             |
| SLC38A3      | sodium-coupled neutral amino acid transp    | 2 105456697 105462661  | 0.199005              | 1.81             | 0.479791              | 1.81             | 0.840128              | -1.13            |
| OXR1         | oxidation resistance protein 1 isoform X2   | 8 107519940 107900456  | 0.199231              | -1.21            | 0.387262              | 1.25             | 0.190371              | 1.24             |
| LOC107127160 |                                             | 13 87347089 87347828   | 0.199260              | 4.00             | 1.000000              | 9.64             | 0.660406              | 1.71             |
| PPP1R26      | protein phosphatase 1 regulatory subunit 2  | 15 2877586 2881230     | 0.199260              | 1.25             | 0.778436              | 1.11             | 0.561082              | -1.13            |
| LOC102145850 |                                             | 16 45001502 45108863   | 0.199260              | -2.17            | 0.925485              | 1.18             | 0.892281              | 1.11             |
| RBPJ         | recombining binding protein suppressor o    | 5 25394899 25671786    | 0.199304              | -1.34            | 0.643267              | 1.23             | 0.282158              | 1.32             |
| LOC102143608 |                                             | 9 111393346 111404101  | 0.199306              | -2.12            | 0.358519              | 2.96             | 0.841757              | -1.17            |
| RBM20        | RNA-binding protein 20 isoform X2           | 9 109842652 110034457  | 0.199522              | 1.58             | 0.880406              | -1.14            | 0.670427              | -1.21            |
| TNS1         | tensin-1 isoform X8                         | 12 107427160 107632750 | 0.199608              | 1.34             | 0.177341              | 1.62             | 0.817975              | -1.07            |
| DYRK1A       | dual specificity tyrosine-phosphorylation-  | 3 9282972 9373704      | 0.199695              | -1.10            | 0.416153              | 1.11             | 0.476861              | 1.07             |
| LOC102145328 |                                             | 14 115811721 115826266 | 0.199802              | 4.19             | 1.000000              | -2.48            | 1.000000              | -4.11            |
| RAD51D       | DNA repair protein RAD51 homolog 4 is       | 16 31489897 31508380   | 0.199822              | 1.18             | 0.878302              | -1.05            | 0.416529              | 1.13             |
| KIAA1161     | uncharacterized family 31 glucosidase KI    | 15 44760047 44762191   | 0.199954              | -1.22            | 0.778436              | 1.10             | 0.867225              | 1.04             |
| PCP4L1       | Purkinje cell protein 4-like protein 1      | 1 90367634 90392089    | 0.199958              | 1.74             | 0.851142              | 1.22             | 0.665953              | 1.29             |
| ZG16B        | zymogen granule protein 16 homolog B        | 20 3007514 3009177     | 0.199982              | -1.57            | 0.783421              | -1.21            | 0.301520              | -1.45            |
| PHF10        | PHD finger protein 10 isoform X1            | 4 1017010 1033858      | 0.200016              | -1.14            | 0.704442              | 1.08             | 0.434074              | -1.10            |
| SI00A16      | protein SI00-A16                            | 1 98260155 98260771    | 0.200016              | -1.20            | 0.801728              | -1.08            | 0.290789              | -1.18            |
| POF1B        | protein POF1B isoform X3                    | X 82421323 82528197    | 0.200016              | -2.92            | 0.000362              | 43.96            | 0.582656              | 1.72             |
| TIFAB        | TRAF-interacting protein with FHA doma      | 6 134521485 134522099  | 0.200254              | -1.48            | 0.421083              | -1.55            | 0.150394              | 1.64             |
| EMC10        | ER membrane protein complex subunit 10      | 19 51312160 51317909   | 0.200359              | -1.17            | 0.040793              | -1.43            | 0.904471              | -1.02            |
| RAD17        | cell cycle checkpoint protein RAD17 isofo   | 6 69213353 69259607    | 0.200370              | -1.13            | 0.741584              | 1.07             | 0.019156              | 1.24             |
| CCDC25       | coiled-coil domain-containing protein 25    | 8 28180401 28220891    | 0.200370              | -1.14            | 0.935121              | 1.02             | 0.965116              | -1.01            |
| FMR1         | fragile X mental retardation protein 1 iso  | X 144812152 144848020  | 0.200424              | -1.29            | 0.141144              | 1.56             | 0.373958              | 1.22             |
| LOC107128950 |                                             | 2 117624692 117699497  | 0.200731              | -5.34            | 1.000000              | -3.16            | 0.995497              | -1.01            |
| LOC102129749 | putative UDP-GlcNAc:betaGal beta-1,3-N      | 15 16503028 16509821   | 0.200755              | 1.32             | 0.459293              | 1.34             | 0.231594              | -1.37            |
| BCL9L        | B-cell CLL/lymphoma 9-like protein isofo    | 14 114914005 114926061 | 0.200777              | 1.17             | 0.802412              | -1.07            | 0.139441              | 1.22             |
| LOC102134522 |                                             | 2 36642439 36643549    | 0.200827              | -1.32            | 0.852983              | 1.10             | 0.178405              | -1.38            |
| LOC102136712 |                                             | 20 985993 987481       | 0.200842              | 1.57             | 0.396822              | 1.76             | 0.491021              | -1.38            |

| Gene symbol  | Gene name                                                                | chr_start_end          | Day3 adjusted P-value | Day3 fold change | Day5 adjusted P-value | Day5 fold change | Day7 adjusted P-value | Day7 fold change |
|--------------|--------------------------------------------------------------------------|------------------------|-----------------------|------------------|-----------------------|------------------|-----------------------|------------------|
| RAD1         | cell cycle checkpoint protein RAD1 isoform 1                             | 6 35306545 35313204    | 0.200842              | -1.25            | 0.161155              | 1.45             | 0.644864              | -1.10            |
| TCTE3        | tetex1 domain-containing protein 3                                       | 4 985462 998048        | 0.200842              | -1.39            | 0.955892              | -1.04            | 0.491021              | -1.23            |
| CXHxorf21    | uncharacterized protein CXorf21 homolog 1                                | X 28684391 28685296    | 0.200842              | -1.44            | 0.811782              | 1.16             | 0.209297              | 1.49             |
| PSMD9        | 26S proteasome non-ATPase regulatory subunit 9                           | 11 125926672 125957645 | 0.200942              | -1.18            | 0.408863              | -1.20            | 0.368681              | -1.14            |
| SERTAD4      | SERTA domain-containing protein 4                                        | 1 68801253 68805636    | 0.201389              | -1.39            | 0.929363              | 1.06             | 0.713543              | 1.12             |
| ZNF501       | zinc finger protein 501                                                  | 2 99724071 99724886    | 0.201392              | -1.34            | 0.646120              | -1.23            | 0.708309              | 1.12             |
| LOC101865459 | putative uncharacterized protein encoded by LOC101865459                 | 1 69962720 69989382    | 0.201424              | 1.45             | 0.760043              | 1.19             | 0.102070              | -1.61            |
| LRFN5        | leucine-rich repeat and fibronectin type-III domain-containing protein 5 | 7 105930534 105947958  | 0.201424              | -1.65            | 0.299359              | -1.95            | 0.000182              | 3.92             |
| PARVA        | alpha-parvin isoform X1                                                  | 14 55217785 55381725   | 0.201521              | 1.16             | 0.328141              | 1.21             | 0.460379              | 1.11             |
| LOC102144008 |                                                                          | 19 16765461 16766921   | 0.201603              | 5.53             | 1.000000              | -1.34            | 1.000000              | -2.08            |
| NUDT14       | uridine diphosphate glucose pyrophosphatase 14                           | 7 170539292 170540269  | 0.201603              | -1.31            | 0.228382              | -1.49            | 0.035434              | -1.55            |
| TMEM167B     | protein kish-B                                                           | 1 117664810 117668454  | 0.201852              | -1.20            | 0.386374              | 1.24             | 0.321838              | 1.17             |
| SCN3B        | sodium channel subunit beta-3 precursor                                  | 14 119631968 119654142 | 0.202139              | 1.73             | 0.746508              | 1.32             | 0.798803              | 1.15             |
| GLIC         | transcriptional activator GLI3 isoform X1                                | 3 78300536 78562785    | 0.202183              | 1.34             | 0.875953              | 1.09             | 0.846845              | 1.06             |
| LPCAT3       | lysophospholipid acyltransferase 5 isoform 1                             | 11 7289121 7331947     | 0.202183              | -1.13            | 0.001252              | -1.46            | 0.081560              | -1.18            |
| MYSM1        | histone H2A deubiquitinase MYSM1 isoform 1                               | 1 168677412 168719307  | 0.202183              | -1.25            | 0.743442              | 1.13             | 0.811409              | 1.06             |
| LOC102130270 | neugrin-like                                                             | 15 101887712 101888998 | 0.202223              | -1.61            | 0.753713              | -1.27            | 0.568628              | -1.31            |
| COL6A5       | collagen alpha-5(VI) chain isoform X1                                    | 2 32643145 32744625    | 0.202277              | 1.40             | 0.501347              | 1.37             | 0.176766              | 1.47             |
| COMM9        | COMM domain-containing protein 9 isoform 1                               | 14 31122184 31135436   | 0.202277              | -1.21            | 0.282408              | -1.29            | 0.190371              | -1.23            |
| SZT2         | protein SZT2 isoform X7                                                  | 1 184165354 184227396  | 0.202373              | 1.22             | 0.570323              | -1.18            | 0.150142              | -1.28            |
| WNT10A       | protein Wnt-10a                                                          | 12 108564386 108577197 | 0.202391              | 1.89             | 0.703822              | 1.44             | 0.580758              | -1.33            |
| PKHD1        | LOW QUALITY PROTEIN: fibrocystin 1                                       | 4 118563730 119020742  | 0.202391              | 1.86             | 0.127667              | 3.08             | 0.601559              | 1.36             |
| LOC102132169 | NKG2-C type II integral membrane protein 2                               | 11 27055 30530         | 0.202391              | 1.54             | 0.659833              | -1.32            | 0.013924              | 2.25             |
| LOC102146578 | NADH-cytochrome b5 reductase 2 isoform 1                                 | 14 60228798 60237094   | 0.202391              | 1.30             | 0.596025              | 1.24             | 0.268374              | -1.29            |
| NRSN2        | neuritin-2                                                               | 10 62276985 62281503   | 0.202498              | 4.46             | 1.000000              | -1.06            | 0.812360              | -1.46            |
| LEKR1        | leucine-, glutamate- and lysine-rich protein 1                           | 2 59201519 59426251    | 0.202498              | 1.76             | 0.344883              | 2.26             | 0.963130              | -1.03            |
| EZR          | ezrin isoform X1                                                         | 4 65180825 65235985    | 0.202498              | -1.28            | 0.475890              | 1.28             | 0.103656              | -1.39            |
| ANXA4        | annexin A4                                                               | 13 40121556 40165350   | 0.202718              | -1.22            | 0.893639              | -1.05            | 0.906068              | -1.03            |
| FEN1         | flap endonuclease 1 isoform X1                                           | 14 12470633 12475013   | 0.202750              | -1.49            | 0.341856              | -1.65            | 0.496137              | 1.28             |
| C10H2orf85   | uncharacterized protein C20orf85 homolog 1                               | 10 90040939 90050739   | 0.202856              | 4.54             | 0.750487              | -2.50            | 0.591533              | -2.22            |
| MTL5         | tesmin isoform X1                                                        | 14 5983384 6038017     | 0.202856              | 2.06             | 0.479791              | -1.90            | 0.963202              | -1.04            |
| TTL4         | tubulin polyglutamylase TTL4 isoform X1                                  | 12 108415269 108432007 | 0.202856              | -1.20            | 0.176558              | -1.35            | 0.782640              | 1.05             |
| LOC102132540 |                                                                          | 0 30296 62528          | 0.202856              | -1.45            | 0.780462              | -1.19            | 0.728960              | 1.14             |
| MAT2B        | methionine adenosyltransferase 2 subunit 2                               | 6 162933919 162949134  | 0.202942              | -1.28            | 0.541082              | 1.24             | 0.195507              | 1.32             |
| OAS2         | 2'-5'-oligoadenylate synthase 2                                          | 11 116705311 116735925 | 0.202942              | -1.37            | 0.733157              | 1.19             | 0.085113              | 1.56             |
| 10-Mar       | #N/A                                                                     | #N/A                   | 0.203166              | 2.64             | 0.287371              | 4.07             | 0.188927              | -3.11            |
| AP3B2        | AP-3 complex subunit beta-2 isoform X1                                   | 7 63311799 63360277    | 0.203166              | 1.35             | 0.415304              | -1.41            | 0.109025              | -1.48            |
| PPM1B        | protein phosphatase 1B isoform X2                                        | 13 66164213 66207859   | 0.203166              | -1.20            | 0.855754              | 1.06             | 0.387936              | 1.15             |
| DPPA4        | developmental pluripotency-associated protein 4                          | 2 162835306 162855703  | 0.203166              | -4.94            | 1.000000              | 1.00             | 1.000000              | -14.28           |
| LOC102141705 | Ig kappa chain V-II region TEW-like                                      | 13 18029242 18030142   | 0.203196              | 2.52             | 0.032074              | 8.00             | 0.380188              | 1.78             |
| LGR6         | leucine-rich repeat-containing G-protein-coupled receptor 6              | 1 60575681 60698684    | 0.203196              | 1.78             | 0.175128              | 2.60             | 0.414810              | -1.53            |
| CLDN23       | claudin-23                                                               | 8 11999847 12000716    | 0.203196              | 1.41             | 0.654951              | -1.26            | 0.543435              | -1.21            |
| RAB2B        | ras-related protein Rab-2B                                               | 7 85035567 85051758    | 0.203196              | -1.19            | 0.780538              | 1.09             | 0.252288              | 1.19             |
| OXNAD1       | oxidoreductase NAD-binding domain-containing protein 1                   | 2 31270605 31304708    | 0.203196              | -1.20            | 0.722419              | -1.11            | 0.911372              | 1.02             |
| CA7          | carbonic anhydrase 7                                                     | 20 54981600 54991013   | 0.203242              | -2.53            | 0.195649              | -5.33            | 0.801674              | -1.27            |
| ZNF599       | zinc finger protein 599 isoform X1                                       | 19 35144464 35158548   | 0.203374              | 1.34             | 0.617237              | -1.25            | 0.566250              | 1.17             |
| CCDC115      | coiled-coil domain-containing protein 115                                | 12 1348794 1352201     | 0.203374              | -1.11            | 0.468966              | -1.11            | 0.321660              | -1.10            |
| THUMP2       | THUMP domain-containing protein 2 isoform 1                              | 13 70856922 70897193   | 0.203374              | -1.23            | 0.724563              | -1.12            | 0.602250              | -1.09            |
| SMC4         | structural maintenance of chromosomes protein 4                          | 2 62798818 62833247    | 0.203374              | -1.27            | 0.682934              | -1.16            | 0.262060              | 1.27             |
| GLDN         | gliomedin isoform X1                                                     | 7 28323371 28390707    | 0.203374              | -1.56            | 0.000003              | 8.67             | 0.188444              | 1.80             |
| FRY          | protein fury homolog isoform X2                                          | 17 11576507 11843325   | 0.203382              | 1.27             | 0.576171              | -1.21            | 0.735221              | -1.08            |
| LHFPL2       | lipoma HMGIC fusion partner-like 2 protein 2                             | 6 76802751 76830900    | 0.203428              | -1.43            | 0.955892              | -1.04            | 0.988106              | 1.01             |
| CARD16       | caspace recruitment domain-containing protein 16                         | 14 100983511 100987456 | 0.203639              | -1.24            | 0.902012              | -1.05            | 0.737262              | 1.07             |
| PLPP4        | phosphatidate phosphatase PPAPDC1A isoform 1                             | 9 119758532 119894339  | 0.203902              | 2.41             | 0.832266              | -1.47            | 0.774590              | -1.28            |
| LOC102119672 | uncharacterized protein NCBP2-AS2                                        | 2 1246655 1246954      | 0.203902              | -1.19            | 0.809330              | -1.08            | 0.326388              | -1.17            |
| DOCK8        | dedicator of cytokinesis protein 8 isoform 1                             | 15 78722736 78960958   | 0.203906              | 1.30             | 0.921938              | -1.05            | 0.510580              | 1.17             |
| RINT1        | RAD50-interacting protein 1 isoform X1                                   | 3 137971919 138019460  | 0.203938              | -1.16            | 0.608537              | 1.12             | 0.790881              | 1.04             |
| LOC107126380 | lysophospholipid acyltransferase 7-like                                  | 19 55056954 55058506   | 0.203981              | 1.43             | 0.738168              | -1.21            | 0.356989              | 1.34             |
| KRT15        | keratin, type I cytoskeletal 15                                          | 16 53169637 53174482   | 0.204055              | 2.60             | 0.991908              | -1.02            | 0.464900              | 1.89             |
| PER2         | period circadian protein homolog 2                                       | 12 128094849 128126755 | 0.204055              | 1.32             | 0.439229              | 1.34             | 0.762548              | 1.09             |
| LOC102123156 |                                                                          | 0 2197 16417           | 0.204055              | 1.30             | 0.878906              | 1.08             | 0.269933              | -1.29            |
| CEP164       | centrosomal protein of 164 kDa isoform X1                                | 14 113297277 113372090 | 0.204055              | 1.11             | 0.003177              | -1.36            | 0.670425              | -1.04            |
| TOB1         | protein Tob1                                                             | 16 36266198 36267235   | 0.204113              | 1.29             | 0.924645              | 1.05             | 0.905144              | -1.03            |
| SH3BP5L      | SH3 domain-binding protein 5-like                                        | 1 138275 150820        | 0.204391              | 1.17             | 0.410991              | -1.19            | 0.416222              | -1.12            |
| NUS1         | dehydrodolichyl diphosphate synthase component 1                         | 4 21668019 21700518    | 0.204528              | -1.35            | 0.515275              | 1.32             | 0.588161              | 1.16             |
| KRT74        | keratin, type II cytoskeletal 74                                         | 11 51410208 51416942   | 0.204683              | 4.25             | 1.000000              | 1.00             | 1.000000              | -4.26            |
| TEKT3        | tektin-3                                                                 | 16 15509713 15537889   | 0.204683              | 2.31             | 0.780639              | -1.47            | 0.985210              | 1.02             |
| FN3K         | fructosamine-3-kinase                                                    | 16 80440708 80456099   | 0.204683              | 1.72             | 0.283270              | -2.10            | 0.384458              | -1.53            |
| ESCO2        | N-acetyltransferase ESCO2 isoform X3                                     | 8 28223933 28256408    | 0.204917              | -1.74            | 0.998004              | 1.00             | 0.517445              | 1.39             |
| CPOX         | oxygen-dependent coproporphyrinogen-III synthase 2                       | 2 173567050 173579445  | 0.205089              | -1.49            | 0.612571              | 1.35             | 0.409272              | 1.35             |
| PTGS2        | prostaglandin G/H synthase 2                                             | 1 44617585 44623823    | 0.205154              | 2.06             | 0.463560              | 2.10             | 0.473621              | -1.60            |
| DUSP23       | dual specificity protein phosphatase 23                                  | 1 91893716 91894979    | 0.205154              | -1.37            | 0.672273              | -1.23            | 0.372870              | -1.29            |
| SLC22A5      | solute carrier family 22 member 5 isoform 1                              | 6 131362418 131386431  | 0.205155              | -1.27            | 0.756286              | -1.13            | 0.390600              | -1.20            |
| FAM92A1      | protein FAM92A1 isoform X2                                               | 8 94822269 94851546    | 0.205282              | -1.23            | 0.017483              | 1.71             | 0.446708              | 1.16             |
| RBP4         | retinol-binding protein 4                                                | 9 92109583 92118572    | 0.205459              | 1.78             | 0.003177              | 5.72             | 0.039207              | -2.59            |
| NOP58        | nucleolar protein 58                                                     | 12 91729898 91765813   | 0.205604              | -1.18            | 0.741311              | 1.09             | 0.870412              | 1.03             |
| 1-Mar        | #N/A                                                                     | #N/A                   | 0.205700              | -1.45            | 0.685742              | 1.27             | 0.528787              | 1.24             |
| LOC102122347 | chondroitin sulfate proteoglycan 4-like isoform 1                        | 7 53381671 53382746    | 0.205783              | 3.84             | 1.000000              | -9.84            | 0.676335              | -2.04            |
| NTSDC3       | 5'-nucleotidase domain-containing protein 3                              | 11 107459602 107523476 | 0.205783              | 1.46             | 0.107608              | 2.22             | 0.934444              | 1.04             |
| XXYL1        | xyloside xylosyltransferase 1 isoform X1                                 | 2 2255332 2451729      | 0.205783              | 1.20             | 0.880611              | 1.06             | 0.252869              | 1.21             |
| TBC1D31      | TBC1 domain family member 31 isoform 1                                   | 8 124430202 124501527  | 0.205783              | -1.22            | 0.075747              | -1.48            | 0.399653              | 1.16             |
| LOC102125956 |                                                                          | 11 5012195 5030064     | 0.205783              | -3.12            | 1.000000              | -1.59            | 0.530984              | 1.74             |
| PRRC1        | protein PRRC1                                                            | 6 126484727 126508548  | 0.205811              | -1.31            | 0.848289              | 1.10             | 0.889881              | 1.04             |
| LOC107129696 |                                                                          | 5 8772087 8778727      | 0.205853              | 1.47             | 0.456710              | -1.49            | 0.188927              | -1.56            |
| ZC2HC1C      | zinc finger C2HC domain-containing protein 1                             | 7 139761280 139769106  | 0.205935              | 1.42             | 0.445916              | -1.44            | 0.195112              | -1.49            |
| MAF1         | repressor of RNA polymerase III transcription factor 1                   | 8 145745248 145746704  | 0.205935              | 1.21             | 0.864904              | -1.06            | 0.168949              | -1.25            |
| MOXD1        | DBH-like monooxygenase protein 1 isoform 1                               | 4 36445212 36571127    | 0.205935              | -1.34            | 0.818334              | 1.12             | 0.087118              | 1.51             |



| Gene symbol  | Gene name                                     | chr_start_end          | Day3 adjusted P-value | Day3 fold change | Day5 adjusted P-value | Day5 fold change | Day7 adjusted P-value | Day7 fold change |
|--------------|-----------------------------------------------|------------------------|-----------------------|------------------|-----------------------|------------------|-----------------------|------------------|
| ITGAV        | integrin alpha-V                              | 12 75634090 75721922   | 0.205935              | -1.55            | 0.649315              | 1.36             | 0.529020              | 1.29             |
| DNAJA4       | dnaJ homolog subfamily A member 4 iso         | 7 56610252 56625916    | 0.205955              | 1.27             | 0.867881              | -1.08            | 0.206290              | -1.30            |
| MTFMT        | methionyl-tRNA formyltransferase, mitoc       | 7 42492497 42520480    | 0.205979              | -1.20            | 0.972888              | 1.01             | 0.702796              | -1.07            |
| EIF3J        | eukaryotic translation initiation factor 3 su | 7 21527069 21551578    | 0.206002              | -1.27            | 0.686010              | 1.17             | 0.660853              | 1.11             |
| AARS         | alanine-tRNA ligase, cytoplasmic              | 20 62393462 62423793   | 0.206008              | 1.12             | 0.149828              | -1.23            | 0.832721              | 1.03             |
| ARMXC1       | armadillo repeat-containing X-linked prot     | X 98689686 98692317    | 0.206008              | -1.19            | 0.433789              | 1.21             | 0.609750              | 1.09             |
| DNAH8        | dynein heavy chain 8, axonemal                | 4 131687197 131996812  | 0.206051              | 2.95             | 0.550394              | -2.39            | 0.250701              | 2.96             |
| OGFOD1       | prolyl 3-hydroxylase OGFOD1                   | 20 44422564 4449068    | 0.206051              | -1.19            | 0.158559              | 1.35             | 0.235866              | 1.20             |
| NUDT1        | 7,8-dihydro-8-oxoguanine triphosphatase       | 3 37181904 37193937    | 0.206190              | -1.23            | 0.291238              | -1.33            | 0.793938              | -1.06            |
| COL6A6       | collagen alpha-6(VI) chain                    | 2 32818434 32929298    | 0.206213              | 1.28             | 0.899208              | 1.06             | 0.567513              | 1.14             |
| CXCR6        | C-X-C chemokine receptor type 6 isoform       | 2 100954702 100958793  | 0.206271              | 1.44             | 0.197370              | -1.76            | 0.838178              | 1.08             |
| UNC5A        | netrin receptor UNC5A                         | 6 176647942 176665601  | 0.206271              | -1.91            | 0.304660              | -3.47            | 0.829577              | -1.18            |
| FBXO28       | F-box only protein 28                         | 1 82748807 82795078    | 0.206452              | -1.28            | 0.113443              | 1.59             | 0.588327              | 1.14             |
| NDP          | norrin precursor                              | X 42240809 42249664    | 0.206452              | -1.76            | 0.981215              | 1.03             | 0.117040              | 2.28             |
| TBX19        | T-box transcription factor TBX19 isoform      | 1 26243578 26272652    | 0.206701              | -1.18            | 0.674944              | 1.12             | 0.605948              | -1.09            |
| MIOX         | inositol oxygenase isoform X2                 | 10 347816 350519       | 0.206701              | -5.76            | 1.000000              | -1.06            | 0.442862              | -2.55            |
| LTBP3        | latent-transforming growth factor beta-bin    | 14 8932100 8952119     | 0.206837              | 1.30             | 0.745066              | 1.15             | 0.426791              | -1.21            |
| C14H11orf58  | small acidic protein                          | 14 50966667 50983198   | 0.206837              | -1.15            | 0.243377              | 1.23             | 0.554604              | 1.08             |
| TMSB10       | thymosin beta-10                              | 13 24563379 24563781   | 0.206837              | -1.25            | 0.653994              | -1.17            | 0.419175              | -1.18            |
| SRP14        | signal recognition particle 14 kDa protein    | 7 16859846 16862620    | 0.206839              | -1.10            | 0.857814              | -1.03            | 0.072824              | -1.15            |
| FCHS2        | F-BAR and double SH3 domains protein          | 14 68022918 68362242   | 0.207094              | 1.14             | 0.799483              | 1.06             | 0.390517              | 1.11             |
| C11H12orf4   | protein C12orf4 homolog                       | 11 4668883 4709814     | 0.207094              | -1.12            | 0.930147              | -1.02            | 0.021063              | 1.21             |
| LOC102128265 | intersectin-1-like isoform X2                 | 3 12885554 12891622    | 0.207094              | -1.71            | 0.696236              | 1.40             | 0.633015              | 1.28             |
| ELAVL2       | ELAV-like protein 2 isoform X6                | 15 54924997 55083062   | 0.207242              | 4.61             | 1.000000              | -2.13            | 1.000000              | -2.04            |
| MTRF1L       | peptide chain release factor 1-like, mitoch   | 4 59238273 59251930    | 0.207242              | -1.14            | 0.720822              | 1.08             | 0.902315              | -1.02            |
| HEXB         | beta-hexosaminidase subunit beta              | 6 72906670 72934404    | 0.207242              | -1.23            | 0.990841              | -1.01            | 0.619778              | -1.10            |
| MCOLN2       | mucoilin-2 isoform X1                         | 1 142254561 142326402  | 0.207242              | -1.30            | 0.845592              | 1.09             | 0.368758              | 1.22             |
| RNF182       | E3 ubiquitin-protein ligase RNF182 isofo      | 4 156831700 156832443  | 0.207242              | -1.62            | 0.878302              | 1.14             | 0.382539              | 1.44             |
| CD300A       | CMRF35-like molecule 8 isoform X3             | 16 71707312 71723141   | 0.207412              | -1.53            | 0.984939              | -1.02            | 0.222323              | 1.58             |
| LOC102134040 | nodal modulator 1 isoform X1                  | 20 16291511 16354059   | 0.208123              | 1.16             | 0.468599              | 1.16             | 0.908841              | 1.02             |
| LOC102144409 |                                               | X 1490379 1515436      | 0.208349              | 1.18             | 0.669163              | -1.12            | 0.219277              | -1.20            |
| SCG2         | secretogranin-2 precursor                     | 12 113355922 113357775 | 0.208481              | 1.96             | 0.156802              | 2.38             | 0.830808              | -1.11            |
| SLC25A34     | solute carrier family 25 member 34 isofo      | 1 212704066 212708231  | 0.208481              | -1.35            | 0.046124              | -2.03            | 0.278711              | 1.36             |
| ACTR2        | actin-related protein 2 isoform X2            | 13 44703386 44742406   | 0.208481              | -1.42            | 0.419367              | 1.48             | 0.430947              | 1.29             |
| PCDH9        | protocadherin-9 isoform X7                    | 17 48099231 49078974   | 0.208481              | -2.12            | 0.008362              | -8.33            | 0.716755              | 1.31             |
| PXMP4        | peroxisomal membrane protein 4                | 10 65049099 65061235   | 0.208540              | 1.19             | 0.001718              | -1.71            | 0.650305              | -1.08            |
| PHACTR1      | phosphatase and actin regulator 1 isoform     | 4 157525677 158108260  | 0.208562              | 1.16             | 0.659085              | 1.11             | 0.112442              | -1.22            |
| GNA11        | guanine nucleotide-binding protein subun      | 19 3061090 3080907     | 0.208584              | 1.13             | 0.669107              | 1.08             | 0.658524              | -1.05            |
| SOX10        | transcription factor SOX-10                   | 10 13226435 13236949   | 0.208592              | 4.64             | 1.000000              | 1.89             | 1.000000              | 3.12             |
| CFAP47       | cilia- and flagella-associated protein 47 is  | X 34367224 34798986    | 0.208592              | 4.21             | 0.987179              | -1.06            | 0.777705              | -1.57            |
| LOC102123575 | Ig lambda chain V-1 region WAH-like           | 7 85294391 85294923    | 0.208592              | 2.88             | 0.123948              | -3.30            | 0.075209              | 2.89             |
| WWP2         | NEDD4-like E3 ubiquitin-protein ligase V      | 20 58094736 58252306   | 0.208592              | 1.14             | 0.447761              | -1.15            | 0.618486              | -1.07            |
| ZNF707       | zinc finger protein 707                       | 8 145316939 145320693  | 0.208592              | 1.14             | 0.261244              | -1.22            | 0.950284              | 1.01             |
| ZNF142       | zinc finger protein 142 isoform X3            | 12 108315918 108334941 | 0.208592              | 1.13             | 0.735924              | -1.07            | 0.849007              | -1.02            |
| LAMTOR4      | regulator complex protein LAMTOR4             | 3 44523642 44524439    | 0.208592              | -1.27            | 0.208679              | -1.45            | 0.234323              | -1.28            |
| CTSZ         | cathepsin Z                                   | 10 90889409 90900710   | 0.208592              | -1.31            | 0.149734              | -1.60            | 0.316456              | -1.27            |
| SNX10        | sorting nexin-10 isoform X2                   | 3 94379329 94405762    | 0.208592              | -1.73            | 0.619720              | 1.50             | 0.733321              | 1.20             |
| GCN1         | translational activator GCN1 isoform X3       | 11 124009288 124078148 | 0.208718              | 1.12             | 0.493246              | -1.11            | 0.755081              | -1.04            |
| ZNF140       | zinc finger protein 140 isoform X3            | 11 137595146 137618668 | 0.208718              | -1.12            | 0.807226              | 1.05             | 0.819435              | -1.03            |
| CGRF1        | cell growth regulator with RING finger do     | 7 118730029 118757349  | 0.208718              | -1.22            | 0.087902              | 1.49             | 0.845059              | 1.04             |
| LOC102115611 | ubiquitin-cytochrome-c reductase comple       | 4 137104409 137118286  | 0.208718              | -1.26            | 0.483206              | -1.25            | 0.719355              | -1.08            |
| RAD23B       | uncharacterized protein LOC101866175          | 15 30361414 30405583   | 0.208718              | -1.30            | 0.580749              | 1.24             | 0.707327              | 1.10             |
| CLN6         | ceroid-lipofuscinosis neuronal protein 6      | 7 45912074 45934009    | 0.208718              | -1.30            | 0.898637              | 1.07             | 0.011476              | -1.66            |
| LOC102120093 | aldo-keto reductase family 1 member B10       | 3 167357155 167370435  | 0.208718              | -1.35            | 0.114448              | -1.79            | 0.638720              | -1.15            |
| BCAS3        | breast carcinoma-amplified sequence 3         | 16 46433875 47185762   | 0.209015              | 1.24             | 0.859712              | 1.07             | 0.709650              | -1.08            |
| TRANK1       | TPR and ankyrin repeat-containing protei      | 2 91669747 91788131    | 0.209086              | 1.29             | 0.858388              | -1.09            | 0.185747              | 1.34             |
| LOC102126870 | LOW QUALITY PROTEIN: olfactory res            | 20 3620545 3621483     | 0.209349              | 3.26             | 1.000000              | 1.56             | 0.873110              | 1.21             |
| LOC107128227 | zinc finger protein 135-like                  | 19 38078064 38078900   | 0.209686              | 3.84             | 1.000000              | 1.89             | 1.000000              | 1.30             |
| LOC102132547 |                                               | 13 110829304 110892486 | 0.209849              | 3.37             | 1.000000              | 2.62             | 0.241795              | -3.23            |
| P2RX6        | P2X purinoceptor 6 isoform X4                 | 10 30607990 30629463   | 0.209849              | 3.35             | 0.909037              | -1.43            | 0.739077              | -1.55            |
| KCNA4        | potassium voltage-gated channel subfamil      | 14 37423000 37424958   | 0.209849              | 2.77             | 0.929970              | 1.22             | 0.169103              | 3.55             |
| FLII         | protein flightless-1 homolog isoform X3       | 16 18593955 18608363   | 0.209849              | 1.13             | 0.486875              | -1.13            | 0.826537              | -1.03            |
| DHRS3        | short-chain dehydrogenase/reductase 3 iso     | 1 215464737 215518813  | 0.209849              | -1.22            | 0.761961              | 1.11             | 0.570873              | -1.11            |
| FOXA2        | hepatocyte nuclear factor 3-beta isoform X    | 10 39695853 39698282   | 0.209849              | -1.23            | 0.152178              | -1.42            | 0.430973              | -1.16            |
| TMEM37       | voltage-dependent calcium channel gamm        | 12 12751188 12761279   | 0.209850              | -1.36            | 0.088803              | -1.82            | 0.989868              | 1.00             |
| NEFL         | neurofilament light polypeptide               | 8 25334215 25338082    | 0.209953              | 3.30             | 0.141024              | 8.43             | 0.861119              | 1.24             |
| STARD5       | star-related lipid transfer protein 5         | 7 59818633 59829058    | 0.209953              | -1.17            | 0.626674              | -1.12            | 0.933179              | 1.01             |
| SSR1         | translocon-associated protein subunit alph    | 4 163653143 163676424  | 0.209953              | -1.37            | 0.624559              | 1.26             | 0.359712              | 1.30             |
| LOC102122124 | nuclear pore complex-interacting protein f    | 20 15150604 15169839   | 0.209961              | 2.03             | 0.144093              | -3.31            | 0.799393              | 1.17             |
| GDNF-AS1     | GDNF antisense RNA 1 (head to head) iso       | 6 38319767 38341429    | 0.209966              | 2.36             | 0.525333              | 2.19             | 0.622477              | -1.50            |
| MRPL34       | 39S ribosomal protein L34, mitochondria       | 19 17630989 17631730   | 0.210028              | -1.17            | 0.300893              | -1.24            | 0.387529              | -1.13            |
| MAFA-F       | mamu class I histocompatibility antigen, a    | 4 141100398 141115234  | 0.210036              | 1.42             | 0.419429              | -1.47            | 0.680550              | 1.15             |
| DHCR24       | delta(24)-sterol reductase                    | 1 172524565 172557685  | 0.210261              | 1.40             | 0.257122              | -1.64            | 0.694008              | 1.14             |
| LOC107129345 |                                               | 3 182929401 182934797  | 0.210316              | 1.67             | 0.000484              | 7.08             | 0.012689              | -2.88            |
| KIF3B        | kinesin-like protein KIF3B                    | 10 63640547 63662480   | 0.210357              | 1.20             | 0.913958              | -1.04            | 0.571561              | 1.10             |
| CLEC14A      | C-type lectin domain family 14 member A       | 7 102213227 102214702  | 0.210370              | 1.34             | 0.978777              | -1.02            | 0.364333              | 1.27             |
| PHLDA1       | pleckstrin homology-like domain family A      | 11 75220184 75224397   | 0.210370              | -1.62            | 0.910364              | -1.11            | 0.410700              | -1.44            |
| KRT4         | keratin, type II cytoskeletal 4               | 11 51641195 51648160   | 0.210494              | 2.73             | 0.919204              | -1.21            | 0.051361              | -4.94            |
| EIF3G        | eukaryotic translation initiation factor 3 su | 19 10370453 10375113   | 0.210494              | 1.18             | 0.800876              | -1.07            | 0.358387              | -1.15            |
| TADA3        | transcriptional adapter 3                     | 2 140770014 140780890  | 0.210494              | 1.13             | 0.130012              | -1.26            | 0.900546              | -1.02            |
| TRMT5        | tRNA (guanine(37)-N1)-methyltransferase       | 7 125293637 125299484  | 0.210494              | -1.16            | 0.613838              | 1.12             | 0.594363              | 1.08             |
| RBM7         | RNA-binding protein 7 isoform X1              | 14 110431040 110437685 | 0.210496              | -1.31            | 0.344883              | 1.40             | 0.580806              | 1.15             |
| LOC107129691 |                                               | 5 5935145 5936866      | 0.210729              | 1.90             | 0.469422              | 1.76             | 0.493383              | -1.57            |
| RASSF9       | ras association domain-containing protein     | 11 85095167 85142352   | 0.210729              | 1.40             | 0.977320              | 1.02             | 0.866081              | -1.06            |
| HNRNPUL2     | heterogeneous nuclear ribonucleoprotein U     | 14 11539188 11551794   | 0.210729              | 1.15             | 0.756583              | -1.07            | 0.360228              | 1.12             |
| LDHB         | L-lactate dehydrogenase B chain isoform       | 11 22336994 22356428   | 0.210729              | 1.12             | 0.629127              | -1.09            | 0.741699              | -1.04            |
| ACAP2        | arf-GAP with coiled-coil, ANK repeat and      | 2 2069677 2244980      | 0.210729              | -1.28            | 0.384718              | 1.34             | 0.421455              | 1.20             |

| Gene symbol  | Gene name                                    | chr_start_end          | Day3 adjusted P-value | Day3 fold change | Day5 adjusted P-value | Day5 fold change | Day7 adjusted P-value | Day7 fold change |
|--------------|----------------------------------------------|------------------------|-----------------------|------------------|-----------------------|------------------|-----------------------|------------------|
| CD300LF      | CMRF35-like molecule 1 isoform X2            | 16 71935167 71956441   | 0.210729              | -1.34            | 0.826050              | 1.12             | 0.973338              | 1.01             |
| GTF2IRD1     | LOW QUALITY PROTEIN: general tran            | 3 49135992 49232383    | 0.210890              | 1.21             | 0.143466              | -1.40            | 0.076437              | -1.31            |
| BMP5         | bone morphogenetic protein 5 isoform X1      | 4 114803797 114924863  | 0.211032              | 1.27             | 0.334845              | 1.35             | 0.747297              | -1.08            |
| ARID2        | AT-rich interactive domain-containing pro    | 11 44493647 44582546   | 0.211293              | -1.22            | 0.690561              | 1.13             | 0.346661              | 1.18             |
| LOC102138519 | poly(rC)-binding protein 2-like isoform X    | 6 26235478 26236536    | 0.211317              | 1.12             | 0.813325              | -1.05            | 0.990548              | 1.00             |
| ANGEL1       | protein angel homolog 1 isoform X2           | 7 141521346 141559849  | 0.211370              | 1.26             | 0.673272              | 1.17             | 0.801921              | -1.06            |
| ZNF521       | zinc finger protein 521 isoform X1           | 18 56916796 57207319   | 0.211543              | 1.27             | 0.400063              | 1.31             | 0.255674              | 1.27             |
| ANG          | angiogenin                                   | 7 84250235 84250675    | 0.211549              | 1.17             | 0.787383              | -1.07            | 0.355333              | -1.14            |
| DDX23        | probable ATP-dependent RNA helicase D        | 11 47650744 47665282   | 0.211580              | 1.13             | 0.755091              | -1.06            | 0.698932              | 1.05             |
| SP5          | transcription factor Sp5 isoform X3          | 12 59646622 59648513   | 0.211580              | -1.35            | 0.744836              | 1.17             | 0.508392              | -1.20            |
| RNF149       | E3 ubiquitin-protein ligase RNF149 isofo     | 13 5656898 5692385     | 0.211584              | -1.28            | 0.656988              | 1.18             | 0.568475              | 1.14             |
| UBA7         | ubiquitin-like modifier-activating enzyme    | 2 105047922 105056409  | 0.211646              | 1.22             | 0.530675              | -1.20            | 0.969193              | 1.01             |
| MRPS27       | 28S ribosomal protein S27, mitochondria      | 6 70369192 70468338    | 0.211646              | -1.09            | 0.668068              | -1.06            | 0.393314              | 1.07             |
| LINGO1       | leucine-rich repeat and immunoglobulin-l     | 7 55922271 55924115    | 0.211719              | 1.64             | 0.141470              | -2.48            | 0.813893              | 1.13             |
| NIPA2        | magnesium transporter NIPA2 isoform X1       | 7 824475 846243        | 0.211719              | -1.27            | 0.668957              | 1.17             | 0.410589              | 1.19             |
| PTGER4       | prostaglandin E2 receptor EP4 subtype iso    | 6 41164175 41175582    | 0.211719              | -1.33            | 0.903612              | -1.07            | 0.289956              | 1.31             |
| LOC102141246 | U8 snRNA-decapping enzyme-like               | 2 33600517 33602112    | 0.211736              | 4.44             | 1.000000              | -1.05            | 1.000000              | 1.08             |
| KPNA4        | importin subunit alpha-3                     | 2 62905755 62966692    | 0.211736              | -1.22            | 0.360878              | 1.27             | 0.317076              | 1.19             |
| LOC102140719 |                                              | 16 69762216 69805384   | 0.211870              | 3.87             | 1.000000              | 3.75             | 0.397439              | -2.19            |
| NRXN3        | neurexin 3 isoform X1                        | 7 143035214 144703031  | 0.212072              | 1.60             | 0.707064              | 1.33             | 0.895007              | 1.07             |
| NALCN        | sodium leak channel non-selective protein    | 17 83647589 84016197   | 0.212119              | 1.62             | 0.831558              | 1.20             | 0.069967              | 2.01             |
| RNF115       | E3 ubiquitin-protein ligase RNF115           | 1 104531567 104614700  | 0.212119              | -1.10            | 0.751330              | 1.05             | 0.426454              | 1.07             |
| CTDNEP1      | CTD nuclear envelope phosphatase 1 isof      | 16 7301206 7308485     | 0.212119              | -1.11            | 0.550383              | -1.10            | 0.315566              | -1.10            |
| IGLL1        | immunoglobulin lambda-like polypeptide       | 0 6502 10834           | 0.212282              | 1.83             | 0.558292              | 1.65             | 0.283651              | -1.80            |
| LOC107129405 | uncharacterized protein LOC107129405         | 4 20398144 20398761    | 0.212354              | 2.90             | 1.000000              | -1.60            | 0.936335              | 1.11             |
| RAMP1        | receptor activity-modifying protein 1 isofo  | 12 127694877 127750907 | 0.212354              | 1.35             | 0.690000              | 1.21             | 0.018497              | -1.73            |
| LOC102135056 |                                              | 4 160480396 160484346  | 0.212372              | 2.82             | 0.425291              | -4.25            | 0.428173              | 2.19             |
| GPX3         | glutathione peroxidase 3                     | 6 150307018 150314489  | 0.212392              | 1.40             | 0.117366              | 1.88             | 0.315617              | 1.35             |
| HMCES        | embryonic stem cell-specific 5-hydroxym      | 11 87866688 87895171   | 0.212392              | 1.16             | 0.556782              | -1.14            | 0.670759              | -1.06            |
| GTDCC1       | glycosyltransferase-like domain-containin    | 12 32443419 32698770   | 0.212392              | -1.15            | 0.609051              | 1.11             | 0.725375              | -1.05            |
| CD9          | CD9 antigen                                  | 11 6406325 6443906     | 0.212392              | -1.18            | 0.170513              | 1.33             | 0.025478              | -1.34            |
| DCAF4        | DDB1- and CUL4-associated factor 4 iso       | 7 137591296 137613911  | 0.212488              | 1.20             | 0.110948              | -1.43            | 0.527555              | -1.12            |
| TSPYL4       | testis-specific Y-encoded-like protein 4     | 4 20282733 20283977    | 0.212488              | 1.16             | 0.151103              | 1.30             | 0.398437              | 1.12             |
| STBD1        | starch-binding domain-containing protein     | 6 153534106 153535005  | 0.212507              | -1.20            | 0.349352              | 1.25             | 0.809665              | 1.05             |
| C1S          | complement C1s subcomponent                  | 11 7389380 7398169     | 0.212566              | 1.25             | 0.465402              | -1.26            | 0.598871              | 1.12             |
| SAP130       | histone deacetylase complex subunit SAP      | 12 3583396 3667833     | 0.212614              | 1.11             | 0.292180              | -1.16            | 0.505194              | 1.07             |
| CRTC2        | CREB-regulated transcription coactivator     | 1 97907695 97918176    | 0.212614              | 1.11             | 0.702424              | -1.07            | 0.109846              | -1.15            |
| GGNB2        | gametogenin-binding protein 2 isoform        | 16 47879995 47959983   | 0.212614              | -1.09            | 0.548874              | 1.08             | 0.259116              | 1.09             |
| TRIM16       | tripartite motif-containing protein 16 isofo | 16 15830524 15884587   | 0.212614              | -1.22            | 0.003033              | 1.83             | 0.004958              | -1.52            |
| LOC107130498 |                                              | 7 167745949 167747608  | 0.212614              | -1.46            | 0.242474              | -1.84            | 0.808799              | -1.11            |
| PURG         | purine-rich element-binding protein gamn     | 8 31592955 31629234    | 0.212645              | -1.59            | 0.332591              | 1.82             | 0.961943              | -1.03            |
| TNXB         | tenascin-X isoform X9                        | 4 138795571 138853437  | 0.212817              | 1.84             | 0.919838              | 1.13             | 0.223318              | -1.93            |
| PER1         | period circadian protein homolog 1 isofo     | 16 8264700 8275917     | 0.212817              | 1.48             | 0.157426              | 1.98             | 0.184374              | -1.58            |
| EFEMP1       | EGF-containing fibulin-like extracellular    | 13 54115581 54171164   | 0.212817              | 1.25             | 0.470139              | 1.25             | 0.083435              | -1.37            |
| SARS         | serine--tRNA ligase, cytoplasmic             | 1 117519354 117545029  | 0.212817              | 1.13             | 0.917784              | -1.03            | 0.771582              | -1.04            |
| NDUFS6       | NADH dehydrogenase [ubiquinone] iron-        | 0 41810 56560          | 0.212817              | -1.21            | 0.652908              | -1.14            | 0.094043              | -1.30            |
| API1         | AP-1 complex subunit sigma-1A isoform        | 3 45457849 45471091    | 0.212817              | -1.22            | 0.200211              | -1.38            | 0.857760              | -1.04            |
| GJB5         | gap junction beta-5 protein                  | 1 193168100 193168921  | 0.212825              | -2.39            | 0.637584              | -2.68            | 0.419201              | -2.15            |
| FAM81B       |                                              | 6 93814450 93866145    | 0.213007              | 4.90             | 0.964672              | -1.19            | 0.673282              | -1.95            |
| LOC102114865 | HLA class I histocompatibility antigen, A    | 4 157 1973             | 0.213091              | -1.28            | 0.731312              | -1.15            | 0.029207              | 1.53             |
| LOC102118988 |                                              | 6 136885797 136961951  | 0.213238              | 1.58             | 0.943868              | 1.07             | 0.783958              | -1.14            |
| STON2        | stonin-2 isoform X4                          | 7 146120999 146256005  | 0.213294              | 1.18             | 0.327931              | 1.24             | 0.944270              | -1.01            |
| LOC102144279 | elongation factor 1-delta-like               | 11 88518974 88519747   | 0.213571              | 1.14             | 0.087170              | 1.31             | 0.887366              | -1.02            |
| KLHL35       | kelch-like protein 35                        | 14 70731858 70740389   | 0.213576              | 2.35             | 0.991049              | 1.02             | 0.855596              | 1.15             |
| ENO3         | beta-enolase isoform X1                      | 16 5028270 5034927     | 0.213579              | -1.41            | 0.497349              | -1.39            | 0.096547              | -1.62            |
| FKRP         | fukutin-related protein                      | 19 47524232 47525719   | 0.213632              | -1.15            | 0.457865              | -1.16            | 0.703160              | -1.05            |
| LOC102140627 | T-cell receptor beta chain V region CTL-I    | 3 175700944 175701535  | 0.213672              | 2.24             | 0.552627              | -2.04            | 0.791208              | 1.22             |
| FASN         | fatty acid synthase                          | 16 79741184 79758790   | 0.213672              | 1.27             | 0.281211              | -1.41            | 0.249085              | -1.28            |
| LOC102130310 | IQ domain-containing protein F1              | 2 107150200 107155599  | 0.213672              | -3.18            | 1.000000              | 3.48             | 0.195507              | 3.40             |
| SEMA3F       | semaphorin-3F isoform X1                     | 2 105397832 105429641  | 0.213783              | 1.16             | 0.004922              | 1.55             | 0.354296              | 1.13             |
| MTHFR        | methylene tetrahydrofolate reductase isofo   | 1 216318398 216331523  | 0.214032              | 1.21             | 0.801473              | -1.09            | 0.864170              | -1.04            |
| LOC102122924 | olfactory receptor 4S2                       | 14 17280765 17281718   | 0.214032              | -2.84            | 0.273590              | 8.72             | 0.712788              | -1.57            |
| VAMP5        | vesicle-associated membrane protein 5 iso    | 13 23855705 23866027   | 0.214075              | -1.25            | 0.903693              | -1.06            | 0.277314              | -1.25            |
| TONSL        | tonsoku-like protein isoform X2              | 8 146116067 146131133  | 0.214075              | -1.28            | 0.108600              | -1.62            | 0.159400              | 1.36             |
| MIS18A       | protein Mis18-alpha                          | 3 14482171 14491782    | 0.214075              | -1.32            | 0.360541              | -1.42            | 0.411691              | 1.24             |
| CCDC64       | bicaudal D-related protein 1 isoform X1      | 11 123870194 123971033 | 0.214104              | 1.38             | 0.751819              | 1.19             | 0.043496              | -1.69            |
| SNTG2        | gamma-2-syntrophin                           | 13 109848312 110223876 | 0.214129              | 2.03             | 0.250632              | 2.86             | 0.935343              | -1.07            |
| MESP2        | mesoderm posterior protein 2                 | 7 70030831 70032730    | 0.214891              | 1.73             | 0.321043              | -2.07            | 0.811716              | 1.14             |
| CLEC4C       | C-type lectin domain family 4 member C       | 11 8147569 8169272     | 0.214912              | 2.47             | 0.919141              | -1.21            | 0.450335              | 1.80             |
| CXXC4        | CXXC-type zinc finger protein 4 isoform      | 5 103900608 103920112  | 0.214912              | 1.87             | 0.217904              | 2.55             | 0.372072              | 1.68             |
| SLAMF7       | SLAM family member 7 isoform X3              | 1 90874720 90888839    | 0.214912              | 1.57             | 0.061996              | -2.64            | 0.128837              | 1.79             |
| GKGYF2       | PERQ amino acid-rich with GYF domain         | 12 122566227 122692324 | 0.214912              | 1.18             | 0.964910              | 1.02             | 0.953646              | 1.01             |
| FKBP1B       | peptidyl-prolyl cis-trans isomerase FKBP     | 13 86903463 86918772   | 0.214912              | -1.32            | 0.731200              | -1.17            | 0.237031              | -1.34            |
| LOC107130257 |                                              | 7 56879271 56881747    | 0.214912              | -1.50            | 0.760138              | 1.22             | 0.220127              | -1.54            |
| LOC107127713 |                                              | 16 6430240 6439118     | 0.214912              | -2.28            | 0.451097              | 2.51             | 0.621856              | -1.50            |
| RECQL5       | ATP-dependent DNA helicase Q5 isoform        | 16 72934974 72975927   | 0.214961              | 1.18             | 0.497349              | -1.17            | 0.973338              | -1.01            |
| CDH8         | cadherin-8 isoform X2                        | 20 49677566 50049202   | 0.215036              | 2.42             | 0.095499              | 6.89             | 0.560938              | -1.61            |
| DGKI         | diacylglycerol kinase iota isoform X8        | 3 170356311 170812601  | 0.215261              | -1.91            | 0.487950              | -1.86            | 0.428261              | -1.64            |
| TNFSF9       | tumor necrosis factor ligand superfamily m   | 19 6720420 6724698     | 0.215373              | -1.56            | 0.735662              | -1.29            | 0.026678              | 2.10             |
| MTERF3       | transcription termination factor 3, mitoch   | 8 97411715 97432077    | 0.215682              | -1.22            | 0.790133              | 1.10             | 0.513300              | 1.13             |
| LXN          | latexin                                      | 2 61010097 61015916    | 0.215682              | -1.59            | 0.400084              | -1.71            | 0.616731              | -1.25            |
| HOOK1        | protein Hook homolog 1                       | 1 167504926 167570210  | 0.215775              | -1.36            | 0.987051              | 1.01             | 0.977828              | 1.01             |
| C4H6orf15    | uncharacterized protein C6orf15 homolog      | 4 139860931 139862190  | 0.215983              | 5.91             | 1.000000              | 1.83             | 0.792699              | 1.50             |
| FOXO6        | forkhead box protein O6                      | 1 186313892 186335565  | 0.215983              | 1.72             | 0.296360              | 2.07             | 0.210026              | 1.74             |
| BICD1        | protein bicaudal D homolog 1 isoform X1      | 11 32659164 32929382   | 0.215983              | -1.35            | 0.204961              | 1.63             | 0.560127              | 1.18             |
| SBDS         | ribosome maturation protein SBDS             | 3 55361117 55368186    | 0.216049              | -1.18            | 0.043532              | 1.46             | 0.779709              | 1.05             |
| RAB4A        | ras-related protein Rab-4A isoform X1        | 1 20283838 20315300    | 0.216244              | -1.13            | 0.353310              | 1.17             | 0.927991              | -1.01            |
