# Supplementary material
Source: PubMed Central journal article supplement (PMC6918093)

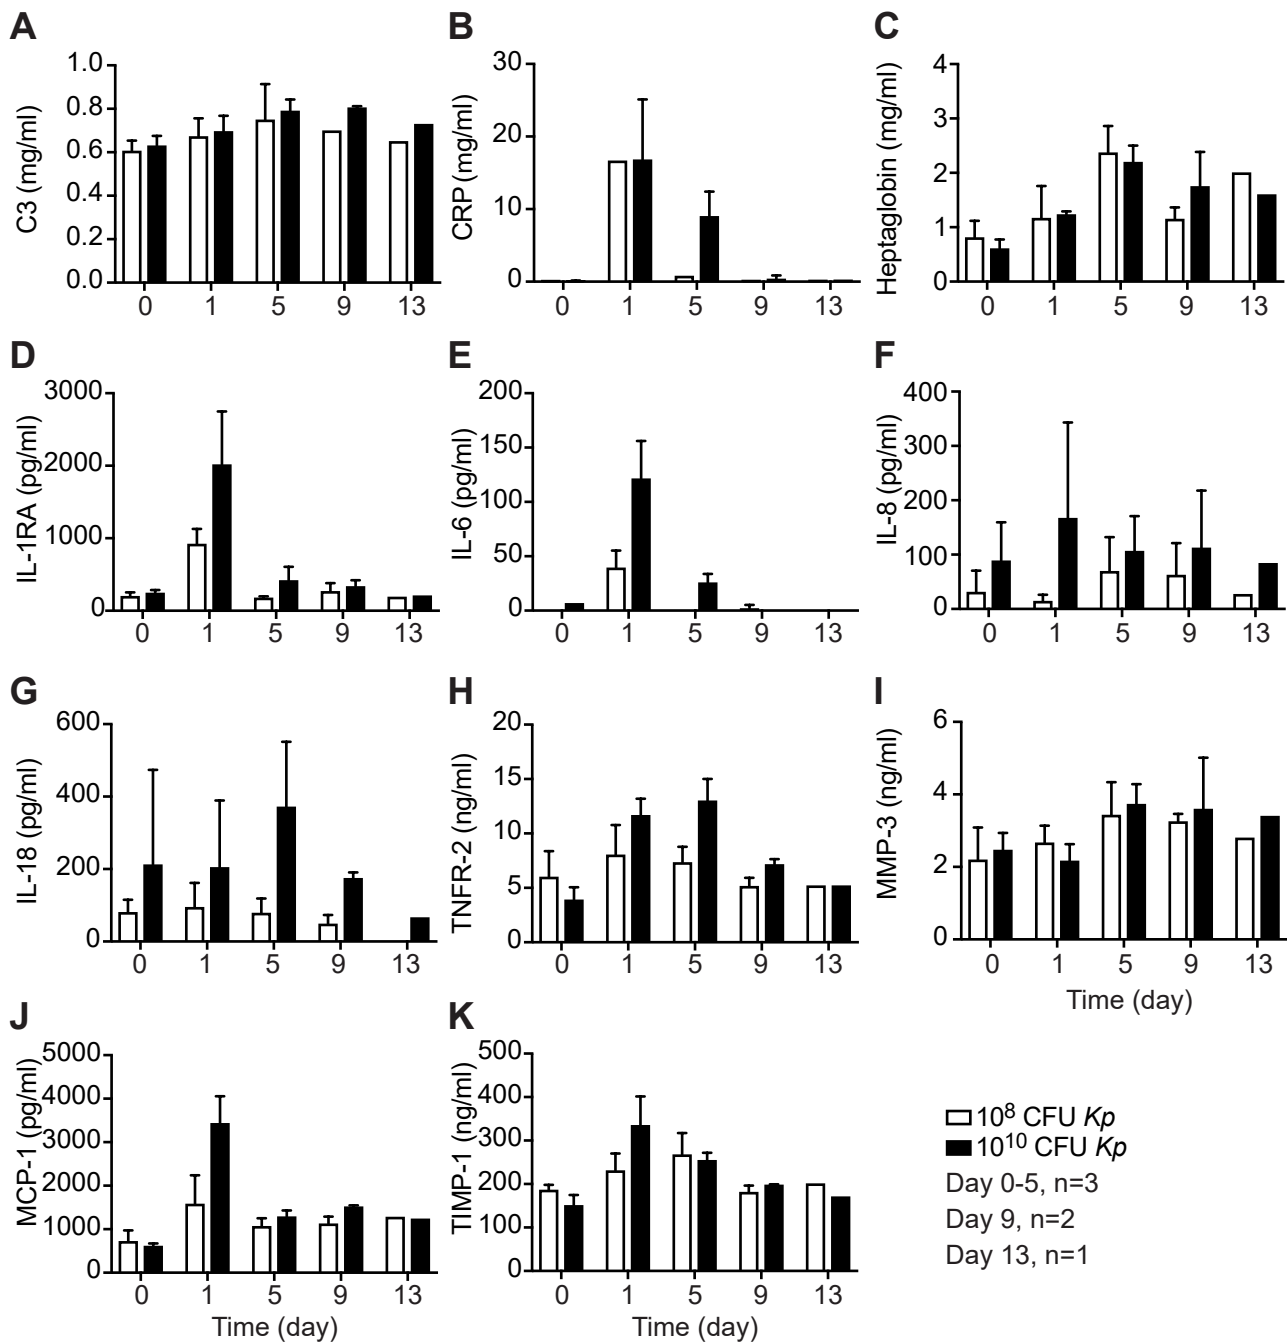

Supplement: mBio.02994-19-sf002.pdf [file mBio.02994-19-sf002.pdf]
